# Supplementary material for: Metal-free site-selective functionalization with cyclic diaryl λ3-chloranes: suppression of benzyne formation for ligand-coupling reactions
Source: Royal Society of Chemistry journal article supplement (doi:10.1039/d4sc04108a), 2024-01-01

- Electronic Supporting Information -

**Metal-Free Site-Selective Functionalization with Cyclic  
Diaryl  $\lambda^3$ -Chloranes: Suppression of Benzyne Formation  
for Ligand-Coupling reactions**

Koushik Patra, Manas Pratim Dey, and Mahiuddin Baidya\*

Department of Chemistry, Indian Institute of Technology Madras,  
Chennai 600 036, Tamil Nadu, India  
E-mail: [mbaidya@iitm.ac.in](mailto:mbaidya@iitm.ac.in)

– Table of Contents –

|                                                                                    | <b>Page</b> |
|------------------------------------------------------------------------------------|-------------|
| • General information                                                              | S3          |
| • General procedure for the synthesis of unsymmetrical biaryls ( <b>4/5/6a</b> )   | S4          |
| • Gram scale synthesis of compound <b>4c</b>                                       | S4          |
| • General procedure for the synthesis of compounds <b>8a-8p</b>                    | S13         |
| • Gram scale synthesis of compound <b>8f</b>                                       | S13         |
| • General procedure for the synthesis of compounds <b>9a-9d</b>                    | S18         |
| • General procedure for the synthesis of compounds <b>10a-10p</b>                  | S19         |
| • General procedure for the synthesis of compounds <b>11/12</b>                    | S23         |
| • Synthesis of compound <b>13</b>                                                  | S25         |
| • Ligand coupling reaction in the presence of radical quencher                     | S26         |
| • Aryne trapping experiment                                                        | S27         |
| • Investigation of aryne formation during three-component ligand coupling reaction | S27         |
| • Crystallographic experimental section                                            | S28         |
| • NMR spectra of synthesized compounds                                             | S31         |

## General information:

All non-aqueous reactions were carried out under an atmosphere of nitrogen in flame-dried glassware and were stirred using a magnetic stir plate. All reactions were carried out using commercial grade solvent unless otherwise noted. CH<sub>3</sub>CN, DCE, and CH<sub>2</sub>Cl<sub>2</sub> were dried over calcium hydride. Dry THF was prepared by distilling over sodium ketyl.

All reactions were monitored by thin layer chromatography (TLC) on WhatmanPartisil® K6F TLC plates (silica gel 60 Å, 0.25 mm thickness) and visualized using a UV lamp (366 or 254 nm) or by use of one of the following visualization reagents: PMA: 10 g phosphomolybdic acid/ 100 mL ethanol; KMnO<sub>4</sub>: 0.75 g potassium permanganate, 5 g K<sub>2</sub>CO<sub>3</sub>, / 100mL water. Products were isolated by column chromatography (Merck silica gel 100-200µm). Yields refer to chromatographically and spectroscopically homogenous materials unless noted otherwise. <sup>13</sup>C and <sup>1</sup>H NMR spectra were recorded on a Bruker400 or Bruker 500 MHz spectrometers. Chemical shift values (δ) are reported in ppm and calibrated to the residual solvent peak CDCl<sub>3</sub> δ = 7.2600 ppm for <sup>1</sup>H, δ = 77.16 for <sup>13</sup>C, DMSO-d<sub>6</sub> δ = 2.500 ppm for <sup>1</sup>H, δ = 39.500 ppm for <sup>13</sup>C; or calibrated to tetramethylsilane (δ = 0.00 ppm). All NMR spectra were recorded at ambient temperature (290 K) unless otherwise noted. <sup>1</sup>H NMR spectra are reported as follows: chemical shift (multiplicity, coupling constant, integration). The following abbreviations are used to indicate multiplicities: s, singlet; d, doublet; t, triplet; q, quartet; quint, quintet; sext, sextet; sept, septet; m, multiplet; dd, doublet of doublet; dt, doublet of triplet; dq, doublet of quartet; td, triplet of doublet; tt, triplet of triplet; dq, doublet of quartet; br, broad; app, apparent.

Mass spectra were recorded by electrospray ionization (ESI) method on a Q-TOF Micro with lock spray source. The crystal data were collected and integrated using a BrukerAxs kappa apex2 CCD diffractometer, with graphite monochromated Mo-Kα radiation.

The λ<sup>3</sup>-chloranes **1** were synthesized following literature procedures (*J. Am. Chem. Soc.* **2023**, *145*, 345).

## General procedure for the synthesis of unsymmetrical biaryls (4/5/6a):

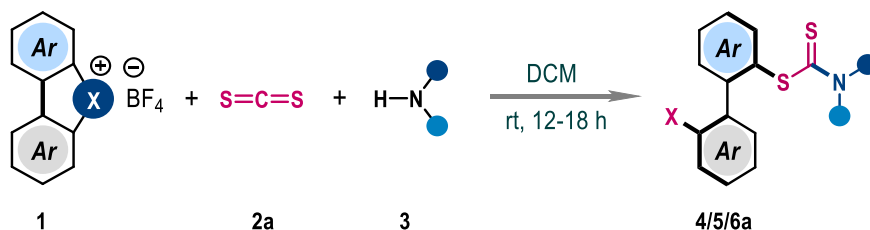

A 16x100 mm oven dried reaction tube equipped with a magnetic stir was charged with corresponding  $\lambda^3$ -chlorane/bromane/iodane **1** (0.2 mmol, 1.0 equiv),  $CS_2$  (**2a**, 0.5 mmol, 2.5 equiv), and amine **3** (0.24 mmol, 1.2 equiv) under  $N_2$  atmosphere. Then, dry DCM (1.5 mL) was added via syringe. The reaction mixture was allowed to stir at rt. After completion of the reaction (12–18 h, TLC monitored), volatiles were removed under reduced pressure and the crude product was purified by silica gel column chromatography to provide pure product **4/5**.

Compound **6a** was prepared similarly using  $\lambda^3$ -iodane (**1a''**),  $CS_2$  (**2a**) and pyrrolidine (**3a**) at 50 °C.

*To minimize potential contamination from metal impurities, we prepared the chloranes using distilled biaryl precursors (Kugelrohr distillation). Additionally, we conducted two rounds of crystallization on the synthesized  $\lambda^3$ -chloranes before employing them in the reaction.*

## Gram scale synthesis of compound **4c**:

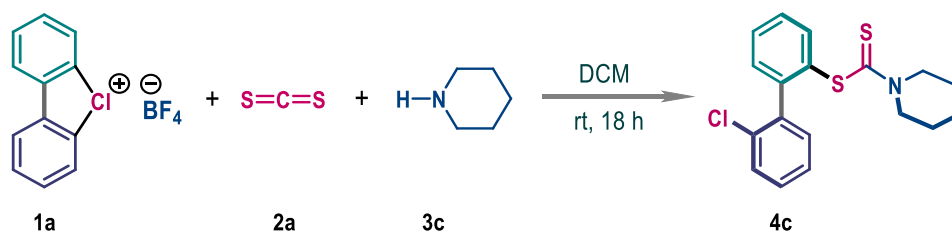

A 100 mL oven dried round bottom flask equipped with a magnetic stir was charged with  $\lambda^3$ -chlorane **1a** (3.64 mmol, 1.0 equiv),  $CS_2$  (**2a**, 2.5 equiv), and piperidine **3c** (1.2 equiv) under  $N_2$  atmosphere. Then, dry DCM (20 mL) was added via syringe. The reaction mixture was allowed to stir at rt for 18 h. After completion, volatiles were removed under reduced pressure and the crude product was purified by silica gel column chromatography to provide pure product **4c** (1.05 g, 80%).

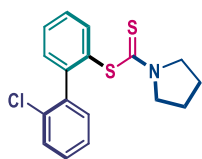

4a

Compound, **4a**: pale yellow sticky liquid; eluent (2% ethyl acetate in hexane). **Yield**: 88% (58 mg); **<sup>1</sup>H NMR (400 MHz, Chloroform-*d*)**  $\delta$ : 7.56 (d,  $J = 7.6$  Hz, 1H), 7.45 (t,  $J = 7.4$  Hz, 1H), 7.41 – 7.37 (m, 2H), 7.33 (d,  $J = 7.6$  Hz, 1H), 7.25 (d,  $J = 7.5$  Hz, 1H), 7.21 – 7.13 (m, 2H), 3.78 – 3.64 (m, 2H), 3.57 – 3.51 (m, 1H), 3.37 – 3.31 (m, 1H), 1.93 – 1.76 (m, 4H). **<sup>13</sup>C NMR (101 MHz, Chloroform-*d*)**  $\delta$ : 192.4, 144.7, 139.5, 138.5, 133.2, 131.3, 130.8, 130.7, 130.2, 128.8, 128.7, 128.6, 126.1, 55.0, 51.1, 26.1, 24.3. **HRMS (ESI/TOF-Q) m/z**: [M+H]<sup>+</sup> Calculated for C<sub>17</sub>H<sub>16</sub>ClNS<sub>2</sub>H<sup>+</sup> 334.0485; Found 334.0477.

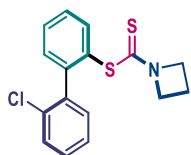

4b

Compound, **4b**: pale yellow sticky liquid; eluent (2% ethyl acetate in hexane). **Yield**: 85% (54 mg); **<sup>1</sup>H NMR (400 MHz, Chloroform-*d*)**  $\delta$ : 7.56 – 7.54 (m, 1H), 7.47 – 7.43 (m, 1H), 7.41 – 7.37 (m, 1H), 7.35 – 7.31 (m, 2H), 7.28 – 7.16 (m, 3H), 4.15 – 4.01 (m, 3H), 3.88 – 3.81 (m, 1H), 2.25 – 2.12 (m, 2H). **<sup>13</sup>C NMR (101 MHz, Chloroform-*d*)**  $\delta$ : 193.7, 144.9, 139.5, 138.4, 133.3, 131.5, 130.8, 130.3, 130.0, 129.0, 128.9, 128.8, 126.3, 54.8, 54.0, 15.0. **HRMS (ESI/TOF-Q) m/z**: [M+H]<sup>+</sup> Calculated for C<sub>16</sub>H<sub>14</sub>ClNS<sub>2</sub>H<sup>+</sup> 320.0329; Found 320.0324.

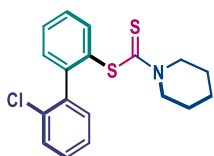

4c

Compound, **4c**: pale yellow sticky liquid; eluent (2% ethyl acetate in hexane). **Yield**: 87% (61 mg); **<sup>1</sup>H NMR (400 MHz, Chloroform-*d*)**  $\delta$ : 7.55 (d,  $J = 7.5$  Hz, 1H), 7.46 (t,  $J = 7.4$  Hz, 1H), 7.41 (d,  $J = 7.5$  Hz, 1H), 7.37 – 7.32 (m, 2H), 7.25 (d,  $J = 7.4$  Hz, 1H), 7.21 – 7.13 (m, 2H), 4.20 – 4.19 (m, 1H), 3.91 – 3.62 (m, 3H), 1.62 – 1.42 (m, 6H). **<sup>13</sup>C NMR (101 MHz, Chloroform-*d*)**  $\delta$ : 195.4, 144.8, 139.6, 138.7, 133.2, 131.4, 131.3, 130.7, 130.3, 128.79, 128.76, 128.7, 126.0, 53.1, 52.3, 25.8, 25.5, 24.2. **HRMS (ESI/TOF-Q) m/z**: [M+H]<sup>+</sup> Calculated for C<sub>18</sub>H<sub>18</sub>ClNS<sub>2</sub>H<sup>+</sup> 348.0642; Found 348.0640.

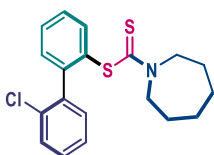

4d

Compound, **4d**: pale yellow sticky liquid; eluent (2% ethyl acetate in hexane). **Yield**: 80% (58 mg); **<sup>1</sup>H NMR (400 MHz, Chloroform-*d*)**  $\delta$ : 7.55 (d,  $J = 7.5$  Hz, 1H), 7.48 (t,  $J = 7.4$  Hz, 1H), 7.44 – 7.40 (m, 1H), 7.37 – 7.32 (m, 2H), 7.27 (d,  $J = 7.6$  Hz, 1H), 7.21 – 7.12 (m, 2H), 4.25 – 4.19 (m, 1H), 3.83 – 3.67 (m, 2H), 3.54 – 3.48 (m, 1H), 1.78 – 1.17 (m, 8H). **<sup>13</sup>C NMR (101 MHz, Chloroform-*d*)**  $\delta$ : 196.1, 145.1, 139.7, 138.9, 133.3, 131.5, 131.2, 130.7, 130.4, 128.82, 128.78, 128.75, 126.1, 55.8, 53.4, 27.1, 26.4 (2×C), 26.2. **HRMS (ESI/TOF-Q) m/z**: [M+H]<sup>+</sup> Calculated for C<sub>19</sub>H<sub>20</sub>ClNS<sub>2</sub>H<sup>+</sup> 362.0798; Found 362.0799.

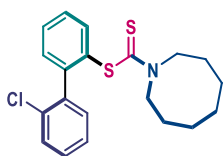

4e

Compound, **4e**: pale yellow solid; eluent (2% ethyl acetate in hexane). **Yield**: 82% (62 mg). **MP**: 112 °C; **<sup>1</sup>H NMR (400 MHz, Chloroform-*d*)**  $\delta$ : 7.55 (d,  $J = 1.5$  Hz, 1H), 7.50 – 7.46 (m, 1H), 7.44 – 7.39 (m, 1H), 7.36 – 7.32 (m, 2H), 7.27 (d,  $J = 5.9$  Hz, 1H), 7.20 – 7.11 (m, 2H), 4.21 – 4.14 (m, 1H), 3.82 – 3.76 (m, 1H), 3.67 – 3.61 (m, 1H), 3.49 – 3.43 (m, 1H), 1.85 – 1.78 (m, 1H), 1.72 – 1.51 (m, 3H), 1.37 – 1.22 (m, 6H). **<sup>13</sup>C NMR (101 MHz, Chloroform-*d*)**  $\delta$ : 196.2, 145.2, 139.7, 139.0, 133.3, 131.6, 131.2, 130.8, 130.5, 128.9, 128.79, 128.76, 126.2, 56.6, 54.3, 26.8, 26.3, 25.3 (2×C), 25.2. **HRMS (ESI/TOF-Q) m/z**: [M+H]<sup>+</sup> Calculated for C<sub>20</sub>H<sub>22</sub>ClNS<sub>2</sub>H<sup>+</sup> 376.0955; Found 376.0952.

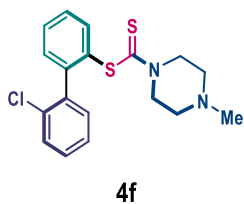

Compound, **4f**: pale yellow sticky liquid; eluent (2% ethyl acetate in hexane). **Yield**: 81% (59 mg); **<sup>1</sup>H NMR (400 MHz, Chloroform-*d*)**  $\delta$ : 7.54 (dd,  $J = 7.6, 1.4$  Hz, 1H), 7.49 – 7.45 (m, 1H), 7.42 – 7.38 (m, 1H), 7.34 – 7.31 (m, 2H), 7.25 (dd,  $J = 7.5, 1.6$  Hz, 1H), 7.22 – 7.13 (m, 2H), 4.20 – 4.02 (m, 2H), 3.76 (bs, 2H), 2.35 – 2.22 (m, 4H), 2.18 (s, 3H). **<sup>13</sup>C NMR (101 MHz, Chloroform-*d*)**  $\delta$ : 196.9, 144.9, 139.6, 138.7, 133.4, 131.5, 131.1, 130.8, 130.5, 129.0, 128.90, 128.85, 126.2, 54.4 ((2×C), 51.4, 50.8, 45.6. **HRMS (ESI/TOF-Q) m/z**: [M+H]<sup>+</sup> Calculated for C<sub>18</sub>H<sub>19</sub>ClN<sub>2</sub>S<sub>2</sub>H<sup>+</sup> 363.0751; Found 363.0752.

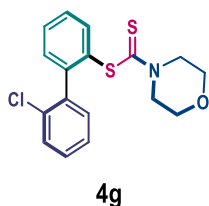

Compound, **4g**: pale yellow sticky liquid; eluent (2% ethyl acetate in hexane). **Yield**: 76% (53 mg); **<sup>1</sup>H NMR (400 MHz, Chloroform-*d*)**  $\delta$ : 7.48 (d,  $J = 7.6$  Hz, 1H), 7.41 (t,  $J = 7.4$  Hz, 1H), 7.34 (t,  $J = 7.5$  Hz, 1H), 7.26 (t,  $J = 7.4$  Hz, 2H), 7.19 (d,  $J = 7.5$  Hz, 1H), 7.20 – 7.07 (m, 2H), 3.98 – 3.36 (m, 8H). **<sup>13</sup>C NMR (101 MHz, Chloroform-*d*)**  $\delta$ : 197.3, 144.9, 139.5, 138.5, 133.3, 131.4, 130.8, 130.7, 130.5, 129.0, 128.88, 128.86, 126.1, 66.2, 51.5. **HRMS (ESI/TOF-Q) m/z**: [M+H]<sup>+</sup> Calculated for C<sub>17</sub>H<sub>16</sub>ClNOS<sub>2</sub>H<sup>+</sup> 350.0435; Found 350.0436.

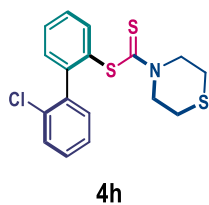

Compound, **4h**: pale yellow sticky liquid; eluent (2% ethyl acetate in hexane). **Yield**: 80% (59 mg); **<sup>1</sup>H NMR (400 MHz, Chloroform-*d*)**  $\delta$ : 7.52 (d,  $J = 7.6$  Hz, 1H), 7.47 (t,  $J = 7.1$  Hz, 1H), 7.42 – 7.38 (m, 1H), 7.33 – 7.29 (m, 2H), 7.26 – 7.13 (m, 3H), 4.60 – 3.90 (m, 4H), 2.67 – 2.07 (m, 4H). **<sup>13</sup>C NMR (101 MHz, Chloroform-*d*)**  $\delta$ : 196.8, 145.0, 139.5, 138.6, 133.3, 131.4, 130.84, 130.79, 130.6, 129.0, 128.9 (2×C), 126.0, 54.5, 54.1, 27.0 (2×C). **HRMS (ESI/TOF-Q) m/z**: [M+H]<sup>+</sup> Calculated for C<sub>17</sub>H<sub>16</sub>ClNS<sub>3</sub>H<sup>+</sup> 366.0206; Found 366.0208.

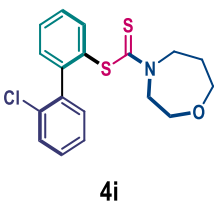

Compound, **4i**: pale yellow sticky liquid; eluent (2% ethyl acetate in hexane). **Yield**: 84% (61 mg); **<sup>1</sup>H NMR (400 MHz, Chloroform-*d*)**  $\delta$ : 7.58 – 7.54 (m, 1H), 7.54 – 7.50 (m, 1H), 7.47 – 7.43 (m, 1H), 7.38 – 7.34 (m, 2H), 7.30 (d,  $J = 7.5$  Hz, 1H), 7.26 – 7.16 (m, 2H), 4.49 – 4.30 (m, 1H), 4.01 – 3.83 (m, 2H), 3.75 – 3.24 (m, 4H), 3.23 – 3.02 (m, 1H), 2.03 – 1.67 (m, 2H). **<sup>13</sup>C NMR (101 MHz, Chloroform-*d*)**  $\delta$ : 197.5, 196.9, 145.12, 145.09, 139.7, 139.6, 138.79, 138.75, 133.4, 131.6, 131.5, 130.88, 130.85, 130.7, 129.04, 128.97, 128.90, 128.88, 128.8, 126.1, 70.1, 69.8, 69.5, 69.3, 58.6, 56.4, 53.7, 51.3, 27.8, 27.0. **HRMS (ESI/TOF-Q) m/z**: [M+H]<sup>+</sup> Calculated for C<sub>18</sub>H<sub>18</sub>ClNOS<sub>2</sub>H<sup>+</sup> 364.0591; Found 364.0598.

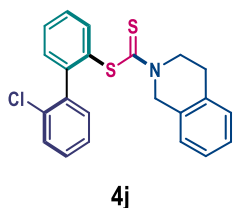

Compound, **4j**: pale yellow sticky liquid; eluent (2% ethyl acetate in hexane). **Yield**: 82% (65 mg); **<sup>1</sup>H NMR (400 MHz, Chloroform-*d*)**  $\delta$ : 7.60 (d,  $J = 7.6$  Hz, 1H), 7.51 (t,  $J = 7.5$  Hz, 1H), 7.44 (t,  $J = 7.5$  Hz, 1H), 7.37 – 7.29 (m, 3H), 7.24 – 7.01 (m, 6H), 5.25 – 4.76 (m, 2H), 4.26 – 3.90 (m, 2H), 2.97 – 2.73 (m, 2H). **<sup>13</sup>C NMR (101 MHz, Chloroform-*d*)**  $\delta$ : 196.5, 144.9, 139.5, 138.6, 135.3, 133.8, 133.2, 132.0, 131.3, 130.8, 130.4, 130.2, 129.6, 129.5, 129.0, 128.9, 128.8, 127.9, 127.4, 127.2, 126.8, 126.6, 126.1, 53.9, 52.2, 50.0, 48.7, 31.6, 29.1. **HRMS (ESI/TOF-Q) m/z**: [M+H]<sup>+</sup> Calculated for C<sub>22</sub>H<sub>18</sub>ClNS<sub>2</sub>H<sup>+</sup> 396.0642; Found 396.0652.

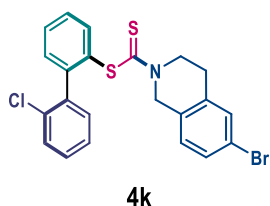

Compound, **4k**: pale yellow sticky liquid; eluent (2% ethyl acetate in hexane). **Yield**: 80% (76 mg); **<sup>1</sup>H NMR (400 MHz, Chloroform-*d*)**  $\delta$ : 7.64 (d,  $J = 7.5$  Hz, 1H), 7.59 – 7.48 (m, 2H), 7.42 – 7.31 (m, 5H), 7.26 – 6.94 (m, 3H), 5.14 – 4.81 (m, 2H), 4.35 – 3.94 (m, 2H), 2.99 – 2.75 (m, 2H). **<sup>13</sup>C NMR (101 MHz, Chloroform-*d*)**  $\delta$ : 196.8, 144.9, 139.4, 138.6, 138.5, 133.2, 131.3, 130.9, 130.5, 129.9, 129.8, 128.93, 128.85, 128.8, 128.3, 126.6, 126.1, 120.8, 53.3, 51.8, 49.4, 48.2, 31.6, 28.8. **HRMS (ESI/TOF-Q) m/z**: [M+H]<sup>+</sup> Calculated for C<sub>22</sub>H<sub>17</sub>Br<sup>81</sup>ClNS<sub>2</sub>H<sup>+</sup> 475.9747; Found 475.9742.

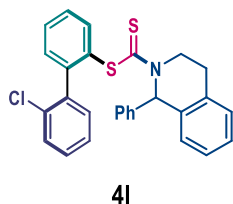

Compound, **4l**: pale yellow sticky liquid; eluent (2% ethyl acetate in hexane). **Yield**: 68% (1.5:1 dr) (64 mg); **<sup>1</sup>H NMR (400 MHz, Chloroform-*d*)**  $\delta$ : 7.96 – 7.88 (m, 1.51H), 7.73 – 7.69 (m, 1.20H), 7.63 – 7.47 (m, 7.88H), 7.45 – 7.11 (m, 28.33H), 7.04 – 6.96 (m, 2.12H), 6.91 – 6.78 (m, 2H), 6.75 – 6.68 (m, 1.46H), 5.00 – 4.83 (m, 1H), 4.22 – 4.06 (m, 1.46H), 3.61 – 3.41 (m, 2.44H), 3.12 – 2.90 (m, 2.13H), 2.74 – 2.53 (m, 3.04H). **<sup>13</sup>C NMR (101 MHz, Chloroform-*d*)**  $\delta$ : 197.34, 197.29, 196.2, 195.9, 145.2, 144.9, 140.5, 139.9, 139.6, 138.9, 138.8, 138.7, 135.3, 134.6, 133.20, 133.15, 131.5, 131.4, 131.3, 130.9, 130.8, 130.7, 130.5, 129.0, 128.92, 128.87, 128.7, 128.5, 128.3, 128.2, 128.0, 127.8, 127.6, 127.53, 127.47, 126.6, 126.4, 126.0, 65.6, 64.5, 64.3, 64.2, 47.0, 45.8, 45.2, 28.5, 28.2, 27.7. **HRMS (ESI/TOF-Q) m/z**: [M+H]<sup>+</sup> Calculated for C<sub>28</sub>H<sub>22</sub>ClNS<sub>2</sub>H<sup>+</sup> 472.0955; Found 472.0955.

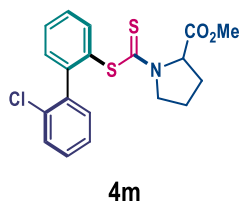

Compound, **4m**: pale yellow sticky liquid; eluent (2% ethyl acetate in hexane). **Yield**: 76% (3:1 dr) (60 mg); **<sup>1</sup>H NMR (400 MHz, Chloroform-*d*)**  $\delta$ : 7.58 – 7.52 (m, 4.77H), 7.49 – 7.26 (m, 18.52H), 7.24 – 7.11 (m, 8.46H), 4.88 – 4.78 (m, 3.05H), 4.64 – 4.40 (m, 1H), 3.97 – 3.56 (m, 18.46H), 3.48 – 3.39 (m, 2.61H), 2.39 – 1.75 (m, 15.49H). **<sup>13</sup>C NMR (101 MHz, Chloroform-*d*)**  $\delta$ : 195.13, 195.10, 194.4, 171.1, 170.9, 170.8, 170.5, 144.8, 144.7, 139.6, 139.3, 138.7, 138.6, 138.5, 138.4, 133.4, 133.1, 133.0, 132.9, 131.6, 131.4, 131.0, 130.74, 130.69, 130.6, 130.4, 130.3, 128.99, 128.95, 128.9, 128.82, 128.76, 128.7, 126.4, 126.20, 126.18, 126.1, 66.4, 66.2, 63.3, 62.8, 55.4, 55.2, 52.9, 52.6, 52.4, 52.3, 51.5, 51.4, 31.8, 31.5, 29.32, 29.27, 24.8, 22.6, 22.5. **HRMS (ESI/TOF-Q) m/z**: [M+H]<sup>+</sup> Calculated for C<sub>19</sub>H<sub>18</sub>ClNO<sub>2</sub>S<sub>2</sub>H<sup>+</sup> 392.0540; Found 392.0546.

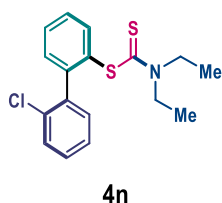

Compound, **4n**: pale yellow sticky liquid; eluent (2% ethyl acetate in hexane). **Yield**: 72% (48 mg); **<sup>1</sup>H NMR (400 MHz, Chloroform-*d*)**  $\delta$ : 7.65 – 7.45 (m, 3H), 7.43 – 7.37 (m, 2H), 7.36 – 7.31 (m, 1H), 7.30 – 7.28 (m, 1H), 7.24 – 7.19 (m, 1H), 4.01 – 3.86 (m, 2H), 3.73 – 3.49 (m, 2H), 1.35 – 1.05 (m, 6H). **<sup>13</sup>C NMR (101 MHz, Chloroform-*d*)**  $\delta$ : 195.6, 145.0, 139.7, 138.9, 133.3, 131.4, 131.3, 130.8, 130.4, 128.9, 128.84, 128.80, 126.1, 49.8, 47.4, 12.6, 11.7. **HRMS (ESI/TOF-Q) m/z**: [M+H]<sup>+</sup> Calculated for C<sub>17</sub>H<sub>18</sub>ClNS<sub>2</sub>H<sup>+</sup> 336.0642; Found 336.0647.

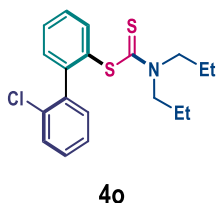

Compound, **4o**: pale yellow sticky liquid; eluent (2% ethyl acetate in hexane). **Yield**: 74% (54 mg); **<sup>1</sup>H NMR (400 MHz, Chloroform-*d*)**  $\delta$ : 7.63 (d,  $J = 7.5$  Hz, 1H), 7.56 (t,  $J = 7.6$  Hz, 1H), 7.51 – 7.47 (m, 1H), 7.43 – 7.33 (m, 3H), 7.30 – 7.18 (m, 2H), 3.96 – 3.38 (m, 4H), 1.80 – 1.41 (m, 4H), 0.97 – 0.79 (m, 6H). **<sup>13</sup>C NMR (101 MHz, Chloroform-*d*)**  $\delta$ : 196.2, 145.0, 139.7, 138.9, 133.3, 131.40, 131.35, 130.8, 130.4, 128.82, 128.78 (2×C), 126.1, 56.9, 54.8, 20.9, 19.7, 11.3, 11.2. **HRMS (ESI/TOF-Q) m/z**: [M+H]<sup>+</sup> Calculated for C<sub>19</sub>H<sub>22</sub>ClNS<sub>2</sub>H<sup>+</sup> 364.0955; Found 364.0957.

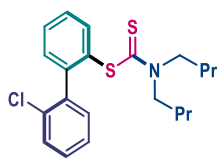

4p

Compound, **4p**: pale yellow sticky liquid; eluent (2% ethyl acetate in hexane). **Yield**: 83% (65 mg); **<sup>1</sup>H NMR (400 MHz, Chloroform-*d*)**  $\delta$ : 7.70 – 7.62 (m, 1H), 7.57 – 7.47 (m, 2H), 7.42 – 7.28 (m, 3H), 7.22 – 7.13 (m, 2H), 3.96 – 3.37 (m, 4H), 1.73 – 1.16 (m, 8H), 0.97 – 0.86 (m, 6H). **<sup>13</sup>C NMR (101 MHz, Chloroform-*d*)**  $\delta$ : 195.9, 145.1, 139.7, 138.9, 133.3, 131.4, 131.3, 130.7, 130.4, 128.81 (2×C), 128.79, 126.1, 55.1, 53.0, 29.5, 28.5, 20.1, 20.0, 14.0, 13.8. **HRMS (ESI/TOF-Q) m/z**: [M+H]<sup>+</sup> Calculated for C<sub>21</sub>H<sub>26</sub>ClNS<sub>2</sub>H<sup>+</sup> 392.1268; Found 392.1266.

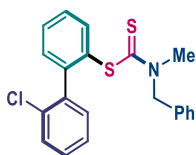

4q

Compound, **4q**: pale yellow sticky liquid; eluent (2% ethyl acetate in hexane). **Yield**: 70% (56 mg); **<sup>1</sup>H NMR (400 MHz, Chloroform-*d*)**  $\delta$ : 7.57 – 7.14 (m, 11H), 6.99 – 6.83 (m, 2H), 5.44 – 4.52 (m, 2H), 3.20 – 3.02 (m, 3H). **<sup>13</sup>C NMR (101 MHz, Chloroform-*d*)**  $\delta$ : 198.9, 197.5, 145.2, 145.1, 139.6, 138.8, 138.6, 135.6, 134.7, 133.4, 131.5, 131.4, 130.9, 130.6, 128.9, 128.8, 128.0, 127.7, 127.6, 127.3, 126.2, 126.1, 59.6, 58.2, 43.2, 39.4. **HRMS (ESI/TOF-Q) m/z**: [M+Na]<sup>+</sup> Calculated for C<sub>21</sub>H<sub>18</sub>ClNS<sub>2</sub>Na<sup>+</sup> 406.0461; Found 406.0465.

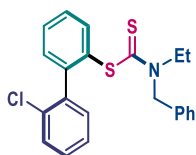

4r

Compound, **4r**: pale yellow sticky liquid; eluent (2% ethyl acetate in hexane). **Yield**: 75% (60 mg); **<sup>1</sup>H NMR (400 MHz, Chloroform-*d*)**  $\delta$ : 7.54 – 7.09 (m, 11H), 6.96 – 6.82 (m, 2H), 5.28 – 4.44 (m, 2H), 3.83 – 3.60 (m, 1H), 3.45 – 3.36 (m, 1H), 0.99 – 0.90 (m, 3H). **<sup>13</sup>C NMR (101 MHz, Chloroform-*d*)**  $\delta$ : 198.1, 196.9, 145.1, 139.7, 138.8, 135.9, 133.3, 131.5, 131.2, 130.8, 130.6, 128.91, 128.87, 128.8, 128.6, 127.6, 127.3, 126.1, 57.0, 55.4, 49.4, 46.8, 12.2, 11.2. **HRMS (ESI/TOF-Q) m/z**: [M+H]<sup>+</sup> Calculated for C<sub>22</sub>H<sub>20</sub>ClNS<sub>2</sub>H<sup>+</sup> 398.0798; Found 398.0791.

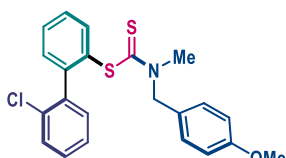

4s

Compound, **4s**: pale yellow sticky liquid; eluent (2% ethyl acetate in hexane). **Yield**: 78% (65 mg); **<sup>1</sup>H NMR (400 MHz, Chloroform-*d*)**  $\delta$ : 7.70 – 6.78 (m, 12H), 5.42 – 4.55 (m, 2H), 3.81 (s, 3H), 3.28 – 3.10 (m, 3H). **<sup>13</sup>C NMR (101 MHz, Chloroform-*d*)**  $\delta$ : 198.6, 197.2, 159.4, 159.3, 145.2, 145.1, 139.8, 139.7, 138.9, 138.7, 133.9, 133.4, 131.7, 131.5, 131.4, 130.9, 130.6, 130.08, 130.06, 129.7, 129.58, 129.55, 129.1, 129.0, 128.9, 128.8, 127.5, 127.2, 126.8, 126.7, 126.6, 126.3, 126.1, 114.3, 114.2, 59.1, 57.7, 55.4, 43.0, 39.2. **HRMS (ESI/TOF-Q) m/z**: [M+H]<sup>+</sup> Calculated for C<sub>22</sub>H<sub>20</sub>ClNOS<sub>2</sub>H<sup>+</sup> 414.0748; Found 414.0754.

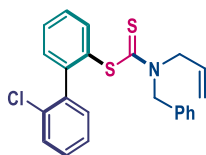

4t

Compound, **4t**: pale yellow sticky liquid; eluent (2% ethyl acetate in hexane). **Yield**: 70% (57 mg); **<sup>1</sup>H NMR (400 MHz, Chloroform-*d*)**  $\delta$ : 7.68 – 7.28 (m, 11H), 7.20 – 6.98 (m, 2H), 5.79 – 5.57 (m, 1H), 5.37 – 4.90 (m, 3H), 4.95 – 4.31 (m, 2H), 4.17 – 4.03 (m, 1H). **<sup>13</sup>C NMR (101 MHz, Chloroform-*d*)**  $\delta$ : 199.1, 198.3, 145.2, 139.7, 138.8, 135.7, 134.8, 133.4, 131.7, 131.5, 131.4, 131.2, 130.9, 130.7, 130.2, 130.1, 129.7, 129.6, 129.0, 128.94, 128.91, 128.7, 127.8, 127.7, 127.4, 126.7, 126.2, 126.1, 118.6, 118.4, 56.7, 56.2, 54.9, 53.8. **HRMS (ESI/TOF-Q) m/z**: [M+H]<sup>+</sup> Calculated for C<sub>23</sub>H<sub>20</sub>ClNS<sub>2</sub>H<sup>+</sup> 410.0798; Found 410.0797.



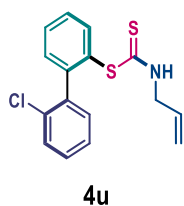

Compound, **4u**: pale yellow sticky liquid; eluent (2% ethyl acetate in hexane). **Yield**: 76% (49 mg); **<sup>1</sup>H NMR (400 MHz, Chloroform-*d*)**  $\delta$ : 7.73 (d,  $J = 7.5$  Hz, 1H), 7.62 – 7.58 (m, 1H), 7.55 – 7.51 (m, 1H), 7.47 – 7.43 (m, 2H), 7.35 – 7.28 (m, 2H), 7.20 (d,  $J = 7.1$  Hz, 1H), 6.67 (s, 1H), 5.78 – 5.69 (m, 1H), 5.12 (d,  $J = 10.3$  Hz, 1H), 5.05 (d,  $J = 17.2$  Hz, 1H), 4.32 – 4.25 (m, 1H), 4.13 – 4.06 (m, 1H). **<sup>13</sup>C NMR (101 MHz, Chloroform-*d*)**  $\delta$ : 194.7, 144.8, 138.3, 137.1, 132.9, 132.4, 131.7, 131.4 (2 $\times$ C), 129.9, 129.8, 129.7, 128.4, 126.8, 118.1, 48.6. **HRMS (ESI/TOF-Q) m/z**: [M+H]<sup>+</sup> Calculated for C<sub>16</sub>H<sub>14</sub>ClNS<sub>2</sub>H<sup>+</sup> 320.0329; Found 320.0332.

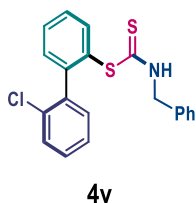

Compound, **4v**: pale yellow sticky liquid; eluent (2% ethyl acetate in hexane). **Yield**: 79% (59 mg); **<sup>1</sup>H NMR (400 MHz, Chloroform-*d*)**  $\delta$ : 7.65 (d,  $J = 7.5$  Hz, 1H), 7.50 – 7.40 (m, 2H), 7.37 – 7.32 (m, 2H), 7.30 – 7.18 (m, 5H), 7.07 – 7.01 (m, 3H), 6.79 (s, 1H), 4.86 (dd,  $J = 15.0, 6.1$  Hz, 1H), 4.57 (dd,  $J = 14.9, 5.0$  Hz, 1H). **<sup>13</sup>C NMR (101 MHz, Chloroform-*d*)**  $\delta$ : 194.9, 144.7, 138.3, 137.1, 136.0, 132.9, 132.3, 131.4, 131.3, 129.8, 129.69, 129.66, 128.9, 128.1, 127.8, 126.7, 125.6, 50.2. **HRMS (ESI/TOF-Q) m/z**: [M+H]<sup>+</sup> Calculated for C<sub>20</sub>H<sub>16</sub>ClNS<sub>2</sub>H<sup>+</sup> 370.0485; Found 370.0485.

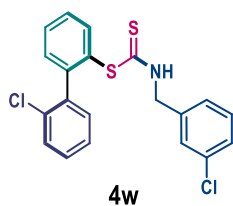

Compound, **4w**: pale yellow sticky liquid; eluent (2% ethyl acetate in hexane). **Yield**: 71% (57 mg); **<sup>1</sup>H NMR (400 MHz, Chloroform-*d*)**  $\delta$ : 7.73 (d,  $J = 7.6$  Hz, 1H), 7.60 – 7.55 (m, 1H), 7.54 – 7.49 (m, 1H), 7.43 – 7.41 (m, 2H), 7.36 – 7.28 (m, 2H), 7.25 – 7.20 (m, 2H), 7.15 – 7.13 (m, 1H), 7.09 (s, 1H), 7.01 (d,  $J = 7.0$  Hz, 1H), 6.88 (s, 1H), 4.90 – 4.85 (m, 1H), 4.70 – 4.62 (m, 1H). **<sup>13</sup>C NMR (101 MHz, Chloroform-*d*)**  $\delta$ : 195.4, 144.7, 138.2, 138.1, 137.1, 134.7, 132.8, 132.4, 131.5, 131.3, 130.1, 130.0, 129.8, 129.7, 128.22, 128.19, 127.8, 126.8, 125.9, 49.3. **HRMS (ESI/TOF-Q) m/z**: [M+H]<sup>+</sup> Calculated for C<sub>20</sub>H<sub>15</sub>Cl<sub>2</sub>NS<sub>2</sub>H<sup>+</sup> 404.0096; Found 404.0095.

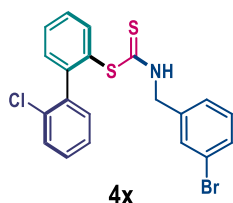

Compound, **4x**: pale yellow sticky liquid; eluent (2% ethyl acetate in hexane). **Yield**: 73% (65 mg); **<sup>1</sup>H NMR (400 MHz, Chloroform-*d*)**  $\delta$ : 7.59 – 7.57 (m, 1H), 7.47 – 7.35 (m, 2H), 7.28 – 7.24 (m, 2H), 7.21 – 7.14 (m, 2H), 7.14 – 7.10 (m, 2H), 7.04 – 6.98 (m, 2H), 6.91 (d,  $J = 7.7$  Hz, 1H), 6.75 – 6.72 (m, 1H), 4.74 – 4.69 (m, 1H), 4.54 – 4.46 (m, 1H). **<sup>13</sup>C NMR (101 MHz, Chloroform-*d*)**  $\delta$ : 195.4, 144.7, 138.4, 138.1, 137.1, 132.8, 132.4, 131.5, 131.3, 131.1, 130.6, 130.4, 130.0, 129.8, 129.7, 128.2, 126.8, 126.4, 122.8, 49.2. **HRMS (ESI/TOF-Q) m/z**: [M+H]<sup>+</sup> Calculated for C<sub>20</sub>H<sub>15</sub>BrClNS<sub>2</sub>H<sup>+</sup> 447.9591; Found 447.9591.

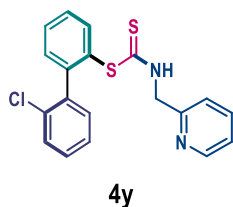

Compound, **4y**: pale yellow sticky liquid; eluent (2% ethyl acetate in hexane). **Yield**: 89% (66 mg); **<sup>1</sup>H NMR (400 MHz, Chloroform-*d*)**  $\delta$ : 8.36 (s, 1H), 8.24 (d,  $J = 4.8$  Hz, 1H), 7.73 (d,  $J = 7.5$  Hz, 1H), 7.62 – 7.57 (m, 2H), 7.51 (t,  $J = 7.6$  Hz, 1H), 7.41 (d,  $J = 7.7$  Hz, 1H), 7.37 (d,  $J = 8.1$  Hz, 1H), 7.24 – 7.22 (m, 1H), 7.18 – 7.11 (m, 4H), 4.83 – 4.77 (m, 1H), 4.72 – 4.67 (m, 1H). **<sup>13</sup>C NMR (101 MHz, Chloroform-*d*)**  $\delta$ : 194.7, 154.0, 148.7, 145.0, 138.8, 137.3, 137.0, 133.3, 131.9, 131.2, 130.9, 129.8, 129.6, 129.5, 128.6, 126.6, 122.7, 122.1, 50.2. **HRMS (ESI/TOF-Q) m/z**: [M+H]<sup>+</sup> Calculated for C<sub>19</sub>H<sub>15</sub>ClN<sub>2</sub>S<sub>2</sub>H<sup>+</sup> 371.0438; Found 371.0446.

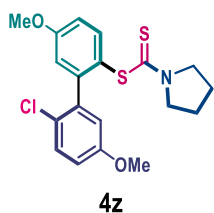

Compound, **4z**: pale yellow sticky liquid; eluent (4% ethyl acetate in hexane). **Yield**: 69% (45 mg); **<sup>1</sup>H NMR (400 MHz, Chloroform-*d*)**  $\delta$ : 7.51 (d, *J* = 8.5 Hz, 1H), 7.29 – 7.27 (m, 1H), 7.09 (d, *J* = 3.0 Hz, 1H), 7.01 (dd, *J* = 8.6, 2.7 Hz, 1H), 6.88 (d, *J* = 2.8 Hz, 1H), 6.83 (dd, *J* = 8.7, 2.9 Hz, 1H), 3.86 (s, 3H), 3.82 – 3.76 (m, 2H), 3.73 (s, 3H), 3.68 – 3.61 (m, 1H), 3.50 – 3.44 (m, 1H), 2.07 – 1.97 (m, 2H), 1.97 – 1.89 (m, 2H). **<sup>13</sup>C NMR (126 MHz, Chloroform-*d*)**  $\delta$ : 194.2, 161.1, 157.6, 146.5, 140.4, 140.1, 129.6, 124.4, 121.6, 116.3, 116.2, 115.5, 114.8, 55.9, 55.5, 55.3, 51.2, 26.3, 24.5. **HRMS (ESI/TOF-Q) *m/z***: [M+H]<sup>+</sup> Calculated for C<sub>19</sub>H<sub>20</sub>ClNO<sub>2</sub>S<sub>2</sub>H<sup>+</sup> 394.0697; Found 394.0696.

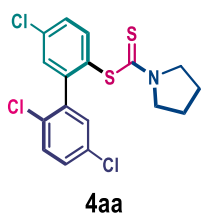

Compound, **4aa**: pale yellow sticky liquid; eluent (4% ethyl acetate in hexane). **Yield**: 78% (50 mg); **<sup>1</sup>H NMR (400 MHz, Chloroform-*d*)**  $\delta$ : 7.56 (d, *J* = 8.4 Hz, 1H), 7.48 – 7.41 (m, 2H), 7.38 – 7.28 (m, 3H), 3.82 (t, *J* = 7.2 Hz, 2H), 3.65 – 3.59 (m, 1H), 3.48 – 3.42 (m, 1H), 2.04 – 1.90 (m, 4H). **<sup>13</sup>C NMR (101 MHz, Chloroform-*d*)**  $\delta$ : 191.5, 145.0, 140.0, 139.9, 136.7, 132.2, 131.8, 131.2, 130.7, 130.1, 129.6, 129.5, 129.4, 55.3, 51.4, 26.3, 24.5. **HRMS (ESI/TOF-Q) *m/z***: [M+H]<sup>+</sup> Calculated for C<sub>17</sub>H<sub>14</sub>Cl<sub>3</sub>NS<sub>2</sub>H<sup>+</sup> 401.9706; Found 401.9702.

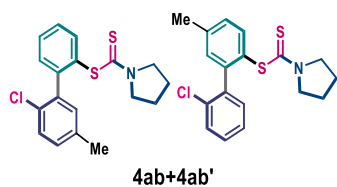

Compound, **4ab+4ab'**: pale yellow sticky liquid; eluent (3% ethyl acetate in hexane). **Yield**: 74% (2:1 rr) (52 mg); **<sup>1</sup>H NMR (400 MHz, Chloroform-*d*)**  $\delta$ : 7.63 – 7.61 (m, 2H), 7.53 – 7.38 (m, 7H), 7.31 – 7.23 (m, 9H), 7.16 – 7.12 (m, 1H), 7.08 – 7.05 (m, 2H), 3.86 – 3.79 (m, 3H), 3.78 – 3.71 (m, 3H), 3.64 – 3.58 (m, 3H), 3.47 – 3.39 (m, 3H), 2.42 (s, 3H), 2.28 (s, 6H), 2.02 – 1.85 (m, 12H). **<sup>13</sup>C NMR (101 MHz, Chloroform-*d*)**  $\delta$ : 193.2, 192.7, 144.9, 144.7, 140.6, 139.8, 139.3, 138.5, 138.4, 135.9, 133.3, 132.1, 131.6, 131.5, 131.0, 130.7, 130.3, 130.2, 129.7, 129.6, 128.8, 128.6, 128.5, 127.5, 126.2, 55.1, 55.1, 51.3, 51.2, 26.2, 24.4, 24.4, 21.6, 20.9. **HRMS (ESI/TOF-Q) *m/z***: [M+H]<sup>+</sup> Calculated for C<sub>18</sub>H<sub>18</sub>CINS<sub>2</sub>H<sup>+</sup> 348.0642; Found 348.0640.

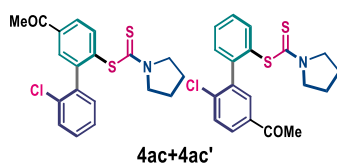

Compound, **4ac+4ac'**: pale yellow sticky liquid; eluent (3% ethyl acetate in hexane). **Yield**: 73% (6:1 rr) (54 mg); **<sup>1</sup>H NMR (400 MHz, Chloroform-*d*)**  $\delta$ : 8.12 (d, *J* = 2.2 Hz, 1H), 8.03 (dd, *J* = 8.1, 2.0 Hz, 6H), 7.93 – 7.90 (m, 7H), 7.75 (d, *J* = 8.1 Hz, 6H), 7.65 (dd, *J* = 7.6, 1.5 Hz, 1H), 7.61 – 7.57 (m, 1H), 7.54 – 7.50 (m, 2H), 7.45 – 7.42 (m, 12H), 7.38 (dd, *J* = 7.5, 1.7 Hz, 1H), 7.43 – 7.25 (m, 12H), 3.86 – 3.70 (m, 14H), 3.67 – 3.60 (m, 7H), 3.49 – 3.39 (m, 7H), 2.64 (s, 18H), 2.53 (s, 3H), 2.09 – 1.87 (m, 28H). **<sup>13</sup>C NMR (101 MHz, Chloroform-*d*)**  $\delta$ : 197.4, 191.2, 145.0, 138.9, 138.9, 138.8, 138.1, 136.6, 133.4, 132.4, 131.5, 130.8, 130.6, 129.5, 129.4, 129.4, 129.1, 128.3, 128.2, 126.5, 55.2, 55.2, 51.5, 51.3, 26.9, 26.3, 24.5, 24.5. **HRMS (ESI/TOF-Q) *m/z***: [M+H]<sup>+</sup> Calculated for C<sub>19</sub>H<sub>18</sub>CINOS<sub>2</sub>H<sup>+</sup> 376.0591; Found 376.0587.

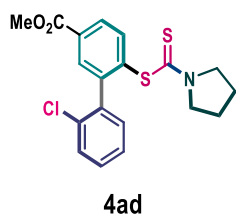

Compound, **4ad**: pale yellow sticky liquid; eluent (3% ethyl acetate in hexane). **Yield**: 71% (>20:1 rr) (55 mg); **<sup>1</sup>H NMR (400 MHz, Chloroform-*d*)**  $\delta$ : 8.12 (dd, *J* = 8.1, 1.9 Hz, 1H), 8.00 (d, *J* = 1.9 Hz, 1H), 7.72 (d, *J* = 8.1 Hz, 1H), 7.44 – 7.41 (m, 2H), 7.33 – 7.24 (m, 2H), 3.92 (s, 3H), 3.85 – 3.72 (m, 2H), 3.67 – 3.60 (m, 1H), 3.49 – 3.42 (m, 1H), 2.07 – 1.97 (m, 2H), 1.96 – 1.88 (m, 2H). **<sup>13</sup>C NMR (101 MHz, Chloroform-*d*)**  $\delta$ : 191.3, 166.5, 144.9, 138.9, 138.6, 136.4, 133.4, 131.9, 131.7, 131.5, 129.6, 129.3, 129.0, 126.4, 55.2, 52.5, 51.5, 26.3, 24.5. **HRMS (ESI/TOF-Q) *m/z***: [M+H]<sup>+</sup> Calculated for C<sub>19</sub>H<sub>18</sub>CINO<sub>2</sub>S<sub>2</sub>H<sup>+</sup> 392.0540; Found 392.0543.

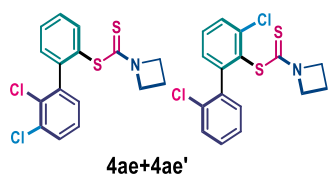

Compound, **4ae+4ae'**: pale yellow sticky liquid; eluent (3% ethyl acetate in hexane). **Yield:** 72% (1:1) (45 mg); **<sup>1</sup>H NMR (400 MHz, Chloroform-*d*)**  $\delta$ : 7.64 – 7.41 (m, 7H), 7.35 – 7.28 (m, 4H), 7.24 – 7.18 (m, 3H), 4.30 – 4.11 (m, 6H), 4.02 – 3.93 (m, 2H), 2.37 – 2.21 (m, 4H). **<sup>13</sup>C NMR (101 MHz, Chloroform-*d*)**  $\delta$ : 193.6, 191.4, 147.6, 144.8, 141.7, 141.6, 139.6, 138.6, 133.2, 132.7, 131.9, 131.3, 131.2, 130.6, 130.5, 130.1, 129.9, 129.81, 129.78, 129.7, 129.32, 129.28, 129.2, 129.0, 126.9, 126.4, 54.9 (2×C), 54.1, 54.0, 15.1, 15.0. **HRMS (ESI/TOF-Q) m/z:** [M+H]<sup>+</sup> Calculated for C<sub>16</sub>H<sub>13</sub>Cl<sub>2</sub>NS<sub>2</sub>H<sup>+</sup> 353.9939; Found 353.9947.

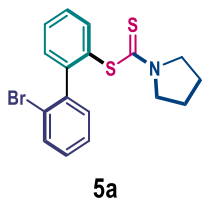

Compound, **5a**: pale yellow sticky liquid; eluent (2% ethyl acetate in hexane). **Yield:** 69% (52 mg); **<sup>1</sup>H NMR (400 MHz, Chloroform-*d*)**  $\delta$ : 7.61 – 7.52 (m, 2H), 7.46 (t, *J* = 7.4 Hz, 1H), 7.41 (d, *J* = 7.4 Hz, 1H), 7.37 (d, *J* = 8.0, 1H), 7.24 – 7.16 (m, 2H), 7.14 – 7.07 (m, 1H), 3.79 – 3.65 (m, 2H), 3.58 – 3.52 (m, 1H), 3.39 – 3.32 (m, 1H), 1.95 – 1.80 (m, 4H). **<sup>13</sup>C NMR (101 MHz, Chloroform-*d*)**  $\delta$ : 192.6, 146.5, 141.7, 138.6, 132.0, 131.3, 130.74, 130.70, 130.3, 129.1, 128.8, 126.8, 123.8, 55.1, 51.3, 26.3, 24.4. **HRMS (ESI/TOF-Q) m/z:** [M+H]<sup>+</sup> Calculated for C<sub>17</sub>H<sub>16</sub>Br<sup>81</sup>NS<sub>2</sub>H<sup>+</sup> 379.9980; Found 379.9976.

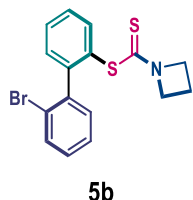

Compound, **5b**: pale yellow sticky liquid; eluent (2% ethyl acetate in hexane). **Yield:** 67% (49 mg); **<sup>1</sup>H NMR (400 MHz, Chloroform-*d*)**  $\delta$ : 7.68 – 7.61 (m, 2H), 7.58 – 7.52 (m, 1H), 7.50 – 7.46 (m, 1H), 7.41 (dd, *J* = 7.6, 1.8 Hz, 1H), 7.37 – 7.28 (m, 2H), 7.24 – 7.20 (m, 1H), 4.24 – 4.07 (m, 3H), 3.97 – 3.90 (m, 1H), 2.43 – 2.18 (m, 2H). **<sup>13</sup>C NMR (101 MHz, Chloroform-*d*)**  $\delta$ : 193.7, 146.6, 141.5, 138.4, 132.1, 131.4, 130.7, 130.4, 129.9, 129.2, 128.9, 126.9, 123.8, 54.8, 54.0, 15.1. **HRMS (ESI/TOF-Q) m/z:** [M+H]<sup>+</sup> Calculated for C<sub>16</sub>H<sub>14</sub>BrNS<sub>2</sub>H<sup>+</sup> 363.9824; Found 363.9829.

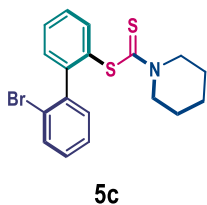

Compound, **5c**: pale yellow sticky liquid; eluent (2% ethyl acetate in hexane). **Yield:** 71% (56 mg); **<sup>1</sup>H NMR (400 MHz, Chloroform-*d*)**  $\delta$ : 7.55 (t, *J* = 8.3 Hz, 2H), 7.51 – 7.47 (m, 1H), 7.45 – 7.30 (m, 2H), 7.28 – 7.20 (m, 2H), 7.16 – 7.09 (m, 1H), 4.21 – 3.64 (m, 4H), 1.65 – 1.44 (m, 6H). **<sup>13</sup>C NMR (101 MHz, Chloroform-*d*)**  $\delta$ : 195.5, 146.6, 141.7, 138.7, 132.0, 131.4, 131.2, 130.7, 130.3, 129.0, 128.8, 126.7, 123.8, 53.2, 52.4, 25.8, 25.6, 24.3. **HRMS (ESI/TOF-Q) m/z:** [M+H]<sup>+</sup> Calculated for C<sub>18</sub>H<sub>18</sub>BrNS<sub>2</sub>H<sup>+</sup> 392.0137; Found 392.0140.

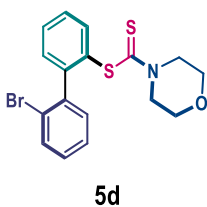

Compound, **5d**: pale yellow sticky liquid; eluent (2% ethyl acetate in hexane). **Yield:** 65% (51 mg); **<sup>1</sup>H NMR (400 MHz, Chloroform-*d*)**  $\delta$ : 7.65 – 7.53 (m, 2H), 7.51 – 7.47 (m, 1H), 7.45 – 7.39 (m, 1H), 7.34 – 7.30 (m, 1H), 7.26 – 7.19 (m, 2H), 7.16 – 7.09 (m, 1H), 3.81 – 3.31 (m, 8H). **<sup>13</sup>C NMR (101 MHz, Chloroform-*d*)**  $\delta$ : 197.4, 146.6, 141.5, 138.6, 132.0, 131.3, 130.8, 130.60, 130.57, 129.2, 128.9, 126.7, 123.8, 66.3, 51.5. **HRMS (ESI/TOF-Q) m/z:** [M+H]<sup>+</sup> Calculated for C<sub>17</sub>H<sub>16</sub>BrNOS<sub>2</sub>H<sup>+</sup> 393.9929; Found 393.9932.

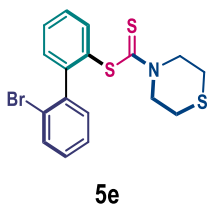

Compound, **5e**: pale yellow sticky liquid; eluent (2% ethyl acetate in hexane). **Yield:** 68% (56 mg); **<sup>1</sup>H NMR (400 MHz, Chloroform-*d*)**  $\delta$ : 7.55 – 7.48 (m, 3H), 7.45 – 7.40 (m, 1H), 7.34 – 7.31 (m, 1H), 7.26 – 7.20 (m, 2H), 7.18 – 7.13 (m, 1H), 4.63 – 3.91 (m, 4H), 2.68 – 2.09 (m, 4H). **<sup>13</sup>C NMR (101 MHz, Chloroform-*d*)**  $\delta$ : 196.8, 146.6, 141.6, 138.7, 132.3, 131.3, 130.8, 130.73, 130.69, 129.2, 128.9, 126.6, 123.9, 54.7, 54.4, 27.1 (2×C). **HRMS (ESI/TOF-Q) m/z:** [M+H]<sup>+</sup> Calculated for C<sub>17</sub>H<sub>16</sub>BrNS<sub>3</sub>H<sup>+</sup> 409.9701; Found 409.9705.

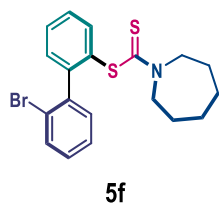

Compound, **5f**: pale yellow sticky liquid; eluent (2% ethyl acetate in hexane). **Yield**: 72% (59 mg); **<sup>1</sup>H NMR (400 MHz, Chloroform-*d*)**  $\delta$ : 7.54 (t,  $J = 8.0$  Hz, 2H), 7.48 (dd,  $J = 7.5$ , 1.4 Hz, 1H), 7.45 – 7.41 (m, 1H), 7.37 (dd,  $J = 7.5$ , 1.7 Hz, 1H), 7.25 (dd,  $J = 7.5$ , 1.5 Hz, 1H), 7.21 – 7.17 (m, 1H), 7.13 – 7.09 (m, 1H), 4.26 – 4.20 (m, 1H), 3.83 – 3.77 (m, 1H), 3.74 – 3.67 (m, 1H), 3.54 – 3.48 (m, 1H), 1.81 – 1.50 (m, 3H), 1.49 – 1.16 (m, 5H). **<sup>13</sup>C NMR (101 MHz, Chloroform-*d*)**  $\delta$ : 196.1, 146.7, 141.8, 138.9, 131.9, 131.4, 131.1, 130.7, 130.4, 129.0, 128.8, 126.7, 123.8, 55.8, 53.4, 27.2, 26.4 (2 $\times$ C), 26.2. **HRMS (ESI/TOF-Q) m/z**: [M+H]<sup>+</sup> Calculated for C<sub>19</sub>H<sub>20</sub>BrNS<sub>2</sub>H<sup>+</sup> 406.0293; Found 406.0295.

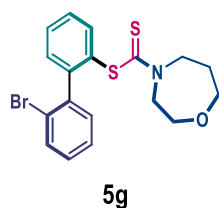

Compound, **5g**: pale yellow sticky liquid; eluent (2% ethyl acetate in hexane). **Yield**: 67% (55 mg); **<sup>1</sup>H NMR (400 MHz, Chloroform-*d*)**  $\delta$ : 7.63 – 7.48 (m, 4H), 7.43 – 7.40 (m, 1H), 7.34 – 7.26 (m, 2H), 7.23 – 7.17 (m, 1H), 4.55 – 4.36 (m, 1H), 4.07 – 3.87 (m, 2H), 3.81 – 3.06 (m, 5H), 2.07 – 1.74 (m, 2H). **<sup>13</sup>C NMR (101 MHz, Chloroform-*d*)**  $\delta$ : 197.4, 196.8, 146.74, 146.72, 141.7, 141.6, 138.79, 138.76, 132.0, 131.9, 131.5, 131.4, 130.8, 130.71, 130.68, 129.2, 129.1, 128.9, 126.7, 123.9, 70.1, 69.8, 69.6, 69.3, 58.6, 56.4, 53.7, 51.3, 27.8, 27.0. **HRMS (ESI/TOF-Q) m/z**: [M+H]<sup>+</sup> Calculated for C<sub>19</sub>H<sub>18</sub>BrNOS<sub>2</sub>H<sup>+</sup> 408.0086; Found 408.0088.

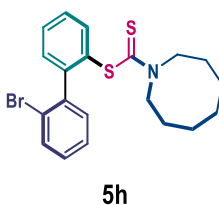

Compound, **5h**: pale yellow sticky liquid; eluent (2% ethyl acetate in hexane). **Yield**: 68% (57 mg); **<sup>1</sup>H NMR (400 MHz, Chloroform-*d*)**  $\delta$ : 7.62 – 7.58 (m, 2H), 7.55 (dd,  $J = 7.4$ , 1.4 Hz, 1H), 7.52 – 7.47 (m, 1H), 7.44 (dd,  $J = 7.6$ , 1.7 Hz, 1H), 7.33 (dd,  $J = 7.6$ , 1.5 Hz, 1H), 7.28 – 7.24 (m, 1H), 7.19 – 7.15 (m, 1H), 4.29 – 4.23 (m, 1H), 3.90 – 3.84 (m, 1H), 3.74 – 3.68 (m, 1H), 3.56 – 3.50 (m, 1H), 1.95 – 1.52 (m, 5H), 1.45 – 1.21 (m, 5H). **<sup>13</sup>C NMR (101 MHz, Chloroform-*d*)**  $\delta$ : 196.1, 146.8, 141.7, 139.0, 131.9, 131.4, 131.0, 130.7, 130.4, 129.0, 128.8, 126.7, 123.8, 56.6, 54.3, 26.8, 26.3, 25.34, 25.31, 25.2. **HRMS (ESI/TOF-Q) m/z**: [M+H]<sup>+</sup> Calculated for C<sub>20</sub>H<sub>22</sub>Br<sup>81</sup>NS<sub>2</sub>H<sup>+</sup> 422.0450; Found 422.0451.

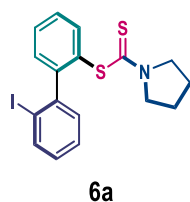

Compound, **6a**: pale yellow sticky liquid; eluent (2% ethyl acetate in hexane). **Yield**: 18% (15 mg); **<sup>1</sup>H NMR (400 MHz, Chloroform-*d*)**  $\delta$ : 7.76 (d,  $J = 8.0$  Hz, 1H), 7.51 (d,  $J = 7.6$  Hz, 1H), 7.44 – 7.30 (m, 2H), 7.32 (dd,  $J = 7.7$ , 1.5 Hz, 1H), 7.19 (t,  $J = 7.5$  Hz, 1H), 7.14 (d,  $J = 6.9$  Hz, 1H), 6.92 – 6.88 (m, 1H), 3.74 – 3.60 (m, 2H), 3.53 – 3.47 (m, 1H), 3.33 – 3.27 (m, 1H), 1.94 – 1.74 (m, 4H). **<sup>13</sup>C NMR (101 MHz, Chloroform-*d*)**  $\delta$ : 192.5, 149.6, 145.8, 138.7, 138.3, 130.7, 130.6, 130.40, 130.35, 129.1, 128.9, 127.6, 100.4, 55.1, 51.3, 26.3, 24.5. **HRMS (ESI/TOF-Q) m/z**: [M+H]<sup>+</sup> Calculated for C<sub>17</sub>H<sub>16</sub>INS<sub>2</sub>H<sup>+</sup> 425.9842; Found 425.9844.

## General procedure for the synthesis of compounds 8a-8p:

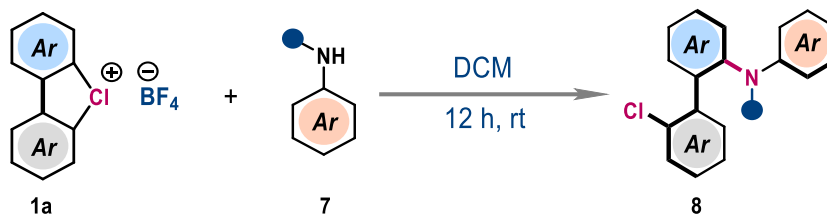

A 16x100 mm oven dried reaction tube equipped with a magnetic stir was charged with  $\lambda^3$ -chlorane **1a** (0.2 mmol, 1.0 equiv) and corresponding aniline **7** (0.2 mmol, 1.0 equiv) under  $\text{N}_2$  atmosphere. Then, dry DCM (2 mL) was added via syringe. The reaction mixture was allowed to stir at rt for 12 h. After completion of the reaction (TLC monitored), volatiles were removed under reduced pressure and the crude product was purified by silica gel column chromatography to provide pure product **8**.

## Gram scale synthesis of compound 8f:

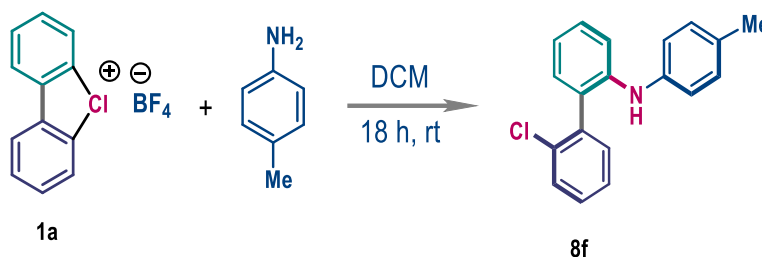

A 100 mL oven dried round bottom flask equipped with a magnetic stir was charged with  $\lambda^3$ -chlorane **1a** (3.64 mmol, 1.0 equiv) and 4-methylaniline (1.0 equiv) under  $\text{N}_2$  atmosphere. Then, dry DCM (20 mL) was added via syringe. The reaction mixture was allowed to stir at rt for 18 h. After completion of the reaction (TLC monitored), volatiles were removed under reduced pressure and the crude product was purified by silica gel column chromatography to provide pure product **8f** (0.77 g, 72%).

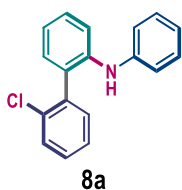

Compound, **8a**: yellow sticky liquid; eluent (1% ethyl acetate in hexane). **Yield**: 69% (39 mg);  $^1\text{H NMR}$  (400 MHz, Chloroform-*d*)  $\delta$ : 7.43 – 7.41 (m, 1H), 7.30 – 7.22 (m, 4H), 7.20 – 7.09 (m, 4H), 6.96 – 6.90 (m, 3H), 6.84 (t,  $J = 7.4$  Hz, 1H), 5.24 (s, 1H).  $^{13}\text{C NMR}$  (101 MHz, Chloroform-*d*)  $\delta$ : 143.2, 141.2, 137.9, 134.3, 132.2, 131.0, 130.1, 129.4, 129.3, 129.04, 128.99, 127.4, 121.5, 120.7, 119.0, 117.0. **HRMS (ESI/TOF-Q) m/z**:  $[\text{M}+\text{H}]^+$  Calculated for  $\text{C}_{18}\text{H}_{14}\text{ClNH}^+$  280.0888; Found 280.0886.

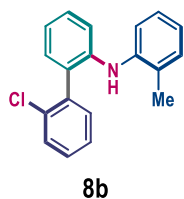

Compound, **8b**: yellow sticky liquid; eluent (1% ethyl acetate in hexane). **Yield**: 76% (45 mg); **<sup>1</sup>H NMR (400 MHz, Chloroform-*d*)**  $\delta$ : 7.54 – 7.50 (m, 1H), 7.40 – 7.29 (m, 3H), 7.27 – 7.23 (m, 2H), 7.19 – 7.17 (m, 1H), 7.15 – 7.07 (m, 3H), 6.98 – 6.90 (m, 2H), 5.11 (s, 1H), 2.08 (s, 3H). **<sup>13</sup>C NMR (101 MHz, Chloroform-*d*)**  $\delta$ : 141.9, 141.1, 138.0, 134.4, 132.1, 131.0, 130.7, 130.0, 129.5, 129.4, 129.0, 128.3, 127.4, 126.8, 122.5, 120.1, 119.9, 116.2, 17.8. **HRMS (ESI/TOF-Q) m/z**: [M+H]<sup>+</sup> Calculated for C<sub>19</sub>H<sub>16</sub>ClNH<sup>+</sup> 294.1044; Found 294.1039.

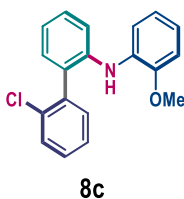

Compound, **8c**: yellow sticky liquid; eluent (1% ethyl acetate in hexane). **Yield**: 72% (45 mg); **<sup>1</sup>H NMR (400 MHz, Chloroform-*d*)**  $\delta$ : 7.53 – 7.47 (m, 2H), 7.37 – 7.27 (m, 5H), 7.23 – 7.21 (m, 1H), 7.03 (t, *J* = 7.3 Hz, 1H), 6.89 – 6.80 (m, 3H), 5.81 (s, 1H), 3.73 (s, 3H). **<sup>13</sup>C NMR (101 MHz, Chloroform-*d*)**  $\delta$ : 149.0, 140.8, 138.0, 134.3, 133.2, 132.1, 131.0, 130.1, 129.9, 129.1, 128.9, 127.1, 120.9 (2×C), 120.3, 118.0, 115.7, 111.0, 55.8. **HRMS (ESI/TOF-Q) m/z**: [M+H]<sup>+</sup> Calculated for C<sub>19</sub>H<sub>16</sub>ClNOH<sup>+</sup> 310.0993; Found 310.0995.

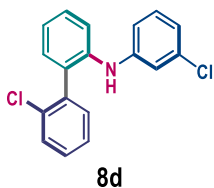

Compound, **8d**: yellow sticky liquid; eluent (1% ethyl acetate in hexane). **Yield**: 62% (39 mg); **<sup>1</sup>H NMR (400 MHz, Chloroform-*d*)**  $\delta$ : 7.51 – 7.48 (m, 1H), 7.40 – 7.28 (m, 5H), 7.21 (d, *J* = 7.5 Hz, 1H), 7.13 – 7.06 (m, 1H), 6.98 (s, 1H), 6.85 – 6.83 (m, 2H), 5.35 (s, 1H). **<sup>13</sup>C NMR (101 MHz, Chloroform-*d*)**  $\delta$ : 145.0, 140.0, 137.7, 135.0, 134.1, 132.0, 131.2, 130.33, 130.30, 130.1, 129.4, 129.1, 127.4, 122.0, 120.9, 118.6, 117.6, 116.0. **HRMS (ESI/TOF-Q) m/z**: [M+H]<sup>+</sup> Calculated for C<sub>18</sub>H<sub>13</sub>Cl<sub>2</sub>NH<sup>+</sup> 314.0498; Found 314.0508.

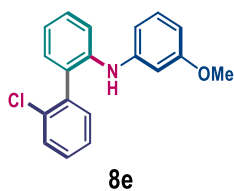

Compound, **8e**: yellow sticky liquid; eluent (1% ethyl acetate in hexane). **Yield**: 63% (39 mg); **<sup>1</sup>H NMR (400 MHz, Chloroform-*d*)**  $\delta$ : 7.51 – 7.49 (m, 1H), 7.42 (d, *J* = 8.2 Hz, 1H), 7.34 – 7.29 (m, 4H), 7.19 (d, *J* = 7.2 Hz, 1H), 7.13 (t, *J* = 8.0 Hz, 1H), 7.02 (t, *J* = 7.4 Hz, 1H), 6.59 (s, 2H), 6.48 (d, *J* = 8.5 Hz, 1H), 5.32 (s, 1H), 3.76 (s, 3H). **<sup>13</sup>C NMR (101 MHz, Chloroform-*d*)**  $\delta$ : 160.8, 144.7, 140.9, 137.8, 134.3, 132.1, 131.0, 130.09, 130.07, 129.4, 129.3, 129.0, 127.4, 121.0, 117.8, 111.3, 106.7, 104.4, 55.4. **HRMS (ESI/TOF-Q) m/z**: [M+H]<sup>+</sup> Calculated for C<sub>19</sub>H<sub>16</sub>ClNOH<sup>+</sup> 310.0993; Found 310.0995.

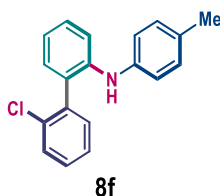

Compound, **8f**: yellow sticky liquid; eluent (1% ethyl acetate in hexane). **Yield**: 78% (46 mg); **<sup>1</sup>H NMR (400 MHz, Chloroform-*d*)**  $\delta$ : 7.50 – 7.47 (m, 1H), 7.37 – 7.28 (m, 3H), 7.26 – 7.22 (m, 2H), 7.14 (d, *J* = 7.3 Hz, 1H), 7.04 (d, *J* = 8.1 Hz, 2H), 6.96 – 6.91 (m, 3H), 5.21 (s, 1H), 2.28 (s, 3H). **<sup>13</sup>C NMR (101 MHz, Chloroform-*d*)**  $\delta$ : 142.0, 140.4, 137.9, 134.3, 132.2, 131.5, 130.9, 130.1, 129.9, 129.3, 129.0, 128.1, 127.4, 120.1, 119.9, 116.0, 20.8. **HRMS (ESI/TOF-Q) m/z**: [M+H]<sup>+</sup> Calculated for C<sub>19</sub>H<sub>16</sub>ClNH<sup>+</sup> 294.1044; Found 294.1039.

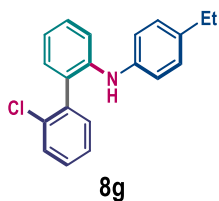

Compound, **8g**: yellow sticky liquid; eluent (1% ethyl acetate in hexane). **Yield**: 80% (49 mg); **<sup>1</sup>H NMR (400 MHz, Chloroform-*d*)**  $\delta$ : 7.53 – 7.51 (m, 1H), 7.37 – 7.28 (m, 5H), 7.17 (d,  $J = 7.3$  Hz, 1H), 7.10 (d,  $J = 8.1$  Hz, 2H), 7.02 – 6.95 (m, 3H), 5.26 (s, 1H), 2.61 (q,  $J = 7.6$  Hz, 2H), 1.24 (t,  $J = 7.6$  Hz, 3H). **<sup>13</sup>C NMR (101 MHz, Chloroform-*d*)**  $\delta$ : 141.92, 140.57, 138.02, 137.91, 134.35, 132.22, 130.89, 130.08, 129.28, 128.98, 128.71, 128.17, 127.39, 120.06, 119.91, 116.02, 28.31, 15.86. **HRMS (ESI/TOF-Q) m/z**: [M+H]<sup>+</sup> Calculated for C<sub>20</sub>H<sub>18</sub>ClNH<sup>+</sup> 308.1201; Found 308.1204.

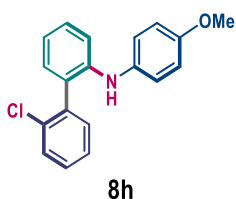

Compound, **8h**: yellow sticky liquid; eluent (1% ethyl acetate in hexane). **Yield**: 76% (47 mg); **<sup>1</sup>H NMR (400 MHz, Chloroform-*d*)**  $\delta$ : 7.53 – 7.51 (m, 1H), 7.41 – 7.31 (m, 3H), 7.23 (d,  $J = 7.4$  Hz, 1H), 7.15 – 7.05 (m, 4H), 6.91 (t,  $J = 7.4$  Hz, 1H), 6.85 (d,  $J = 8.7$  Hz, 2H), 5.14 (s, 1H), 3.79 (s, 3H). **<sup>13</sup>C NMR (101 MHz, Chloroform-*d*)**  $\delta$ : 155.81, 143.19, 137.94, 135.76, 134.35, 132.29, 130.75, 130.12, 129.30, 129.05, 127.47, 127.07, 123.59, 119.11, 114.75, 114.56, 55.69. **HRMS (ESI/TOF-Q) m/z**: [M+H]<sup>+</sup> Calculated for C<sub>19</sub>H<sub>16</sub>ClNOH<sup>+</sup> 310.0993; Found 310.0995.

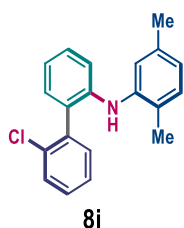

Compound, **8i**: white solid; eluent (1% ethyl acetate in hexane). **Yield**: 79% (49 mg); **MP**: 118 °C; **<sup>1</sup>H NMR (400 MHz, Chloroform-*d*)**  $\delta$ : 7.54 – 7.50 (m, 1H), 7.40 – 7.31 (m, 3H), 7.30 – 7.28 (m, 1H), 7.19 – 7.17 (m, 1H), 7.08 – 7.02 (m, 3H), 6.96 (t,  $J = 7.4$  Hz, 1H), 6.75 (d,  $J = 7.5$  Hz, 1H), 5.08 (s, 1H), 2.27 (s, 3H), 2.04 (s, 3H). **<sup>13</sup>C NMR (101 MHz, Chloroform-*d*)**  $\delta$ : 142.0, 140.7, 138.0, 136.5, 134.4, 132.1, 130.8, 130.7, 130.0, 129.3, 129.0, 128.1, 127.4, 126.5, 123.4, 120.9, 119.7, 116.1, 21.2, 17.4. **HRMS (ESI/TOF-Q) m/z**: [M+H]<sup>+</sup> Calculated for C<sub>20</sub>H<sub>18</sub>ClNH<sup>+</sup> 308.1201; Found 308.1204.

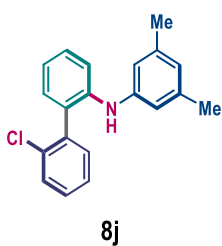

Compound, **8j**: yellow sticky liquid; eluent (1% ethyl acetate in hexane). **Yield**: 80% (49 mg); **<sup>1</sup>H NMR (400 MHz, Chloroform-*d*)**  $\delta$ : 7.52 – 7.50 (m, 1H), 7.39 – 7.28 (m, 5H), 7.18 (dd,  $J = 7.6, 1.6$  Hz, 1H), 6.99 (t,  $J = 7.3$  Hz, 1H), 6.68 (s, 2H), 6.59 (s, 1H), 5.25 (s, 1H), 2.25 (s, 6H). **<sup>13</sup>C NMR (101 MHz, Chloroform-*d*)**  $\delta$ : 143.0, 141.3, 139.1, 137.9, 134.3, 132.2, 131.0, 130.1, 129.3, 129.0, 128.8, 127.4, 123.4, 120.3, 117.0, 116.8, 21.5. **HRMS (ESI/TOF-Q) m/z**: [M+H]<sup>+</sup> Calculated for C<sub>20</sub>H<sub>18</sub>ClNH<sup>+</sup> 308.1201; Found 308.1204.

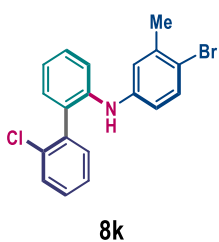

Compound, **8k**: yellow sticky liquid; eluent (1% ethyl acetate in hexane). **Yield**: 75% (56 mg); **<sup>1</sup>H NMR (400 MHz, Chloroform-*d*)**  $\delta$ : 7.51 – 7.48 (m, 1H), 7.34 – 7.29 (m, 6H), 7.20 – 7.18 (m, 1H), 7.05 – 7.01 (m, 1H), 6.88 (d,  $J = 2.8$  Hz, 1H), 6.73 (dd,  $J = 8.6, 2.7$  Hz, 1H), 5.24 (s, 1H), 2.31 (s, 3H). **<sup>13</sup>C NMR (101 MHz, Chloroform-*d*)**  $\delta$ : 142.7, 140.7, 138.7, 137.7, 134.2, 132.9, 132.1, 131.1, 130.1, 129.5, 129.4, 129.1, 127.4, 121.2, 120.8, 117.7, 117.6, 115.9, 23.1. **HRMS (ESI/TOF-Q) m/z**: [M+H]<sup>+</sup> Calculated for C<sub>19</sub>H<sub>15</sub>BrClNH<sup>+</sup> 372.0149; Found 372.0153.

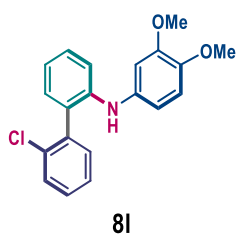

Compound, **8l**: yellow sticky liquid; eluent (1% ethyl acetate in hexane). **Yield**: 81% (59 mg); **<sup>1</sup>H NMR (400 MHz, Chloroform-*d*)**  $\delta$ : 7.53 – 7.51 (m, 1H), 7.40 – 7.33 (m, 3H), 7.28 – 7.23 (m, 1H), 7.16 – 7.13 (m, 2H), 6.94 – 6.90 (m, 1H), 6.79 (d,  $J = 8.3$  Hz, 1H), 6.68 – 6.65 (m, 2H), 5.16 (s, 1H), 3.86 (s, 3H), 3.82 (s, 3H). **<sup>13</sup>C NMR (101 MHz, Chloroform-*d*)**  $\delta$ : 149.7, 145.2, 142.9, 137.9, 136.3, 134.3, 132.3, 130.8, 130.1, 129.3, 129.1, 127.5, 127.3, 119.4, 115.0, 113.7, 112.2, 106.7, 56.4, 56.0. **HRMS (ESI/TOF-Q) m/z**: [M+Na]<sup>+</sup> Calculated for C<sub>20</sub>H<sub>18</sub>ClNO<sub>2</sub>Na<sup>+</sup> 362.0918; Found 362.0929.

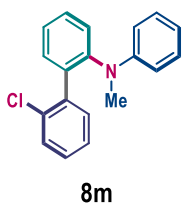

Compound, **8m**: yellow sticky liquid; eluent (1% ethyl acetate in hexane). **Yield**: 79% (46 mg); **<sup>1</sup>H NMR (400 MHz, Chloroform-*d*)**  $\delta$ : 7.43 – 7.39 (m, 3H), 7.34 – 7.28 (m, 2H), 7.20 – 7.10 (m, 5H), 6.72 – 6.68 (m, 1H), 6.65 (d,  $J = 8.1$  Hz, 2H), 2.92 (s, 3H). **<sup>13</sup>C NMR (101 MHz, Chloroform-*d*)**  $\delta$ : 149.4, 147.0, 138.7, 137.6, 133.2, 132.5, 131.5, 129.7, 129.5, 128.8, 128.7, 128.3, 126.5, 125.4, 117.6, 114.3, 39.4. **HRMS (ESI/TOF-Q) m/z**: [M+H]<sup>+</sup> Calculated for C<sub>19</sub>H<sub>16</sub>ClNH<sup>+</sup> 294.1044; Found 294.1039.

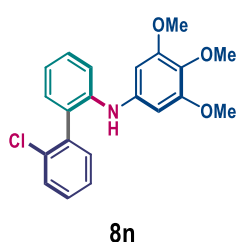

Compound, **8n**: yellow sticky liquid; eluent (1% ethyl acetate in hexane). **Yield**: 62% (49 mg); **<sup>1</sup>H NMR (400 MHz, Chloroform-*d*)**  $\delta$ : 7.53 – 7.50 (m, 1H), 7.37 – 7.27 (m, 5H), 7.18 – 7.16 (m, 1H), 7.00 – 6.95 (m, 1H), 6.29 (s, 2H), 5.20 (s, 1H), 3.80 (s, 3H), 3.79 (s, 6H). **<sup>13</sup>C NMR (101 MHz, Chloroform-*d*)**  $\delta$ : 153.9, 141.7, 139.2, 137.8, 134.3, 133.4, 132.2, 131.1, 130.1, 129.4, 129.1, 128.5, 127.5, 120.3, 116.6, 97.7, 61.2, 56.2. **HRMS (ESI/TOF-Q) m/z**: [M+Na]<sup>+</sup> Calculated for C<sub>21</sub>H<sub>20</sub>ClNO<sub>3</sub>Na<sup>+</sup> 392.1024; Found 392.1031.

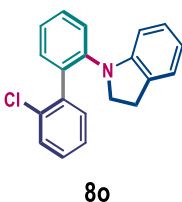

Compound, **8o**: yellow sticky liquid; eluent (1% ethyl acetate in hexane). **Yield**: 76% (47 mg); **<sup>1</sup>H NMR (400 MHz, Chloroform-*d*)**  $\delta$ : 7.56 – 7.54 (m, 1H), 7.45 – 7.32 (m, 4H), 7.27 – 7.23 (m, 3H), 7.07 (d,  $J = 7.1$  Hz, 1H), 7.00 (t,  $J = 8.2$  Hz, 1H), 6.69 – 6.65 (m, 2H), 3.40 – 3.32 (m, 2H), 2.94 – 2.87 (m, 2H). **<sup>13</sup>C NMR (101 MHz, Chloroform-*d*)**  $\delta$ : 149.7, 144.1, 139.4, 135.7, 133.6, 132.0, 131.8, 130.5, 129.7, 129.2, 128.6, 127.0, 126.7, 124.8, 124.5, 123.4, 118.3, 109.0, 54.1, 28.9. **HRMS (ESI/TOF-Q) m/z**: [M+H]<sup>+</sup> Calculated for C<sub>20</sub>H<sub>16</sub>ClNH<sup>+</sup> 306.1044; Found 306.1040.

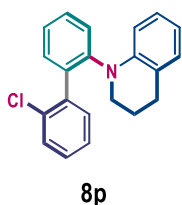

Compound, **8p**: yellow sticky liquid; eluent (1% ethyl acetate in hexane). **Yield**: 74% (47 mg); **<sup>1</sup>H NMR (400 MHz, Chloroform-*d*)**  $\delta$ : 7.44 – 7.36 (m, 4H), 7.32 – 7.28 (m, 1H), 7.25 – 7.14 (m, 3H), 6.94 – 6.89 (m, 2H), 6.61 (t,  $J = 7.3$  Hz, 1H), 6.55 (d,  $J = 8.2$  Hz, 1H), 3.15 (d,  $J = 50.3$  Hz, 2H), 2.72 – 2.66 (m, 2H), 1.77 – 1.60 (m, 2H). **<sup>13</sup>C NMR (101 MHz, Chloroform-*d*)**  $\delta$ : 146.4, 145.3, 138.7, 137.8, 132.5, 131.6, 129.7, 129.4, 129.3, 128.7, 128.5, 126.7, 126.51, 126.47, 125.4, 122.8, 117.2, 114.8, 50.6, 27.9, 21.9. **HRMS (ESI/TOF-Q) m/z**: [M+H]<sup>+</sup> Calculated for C<sub>21</sub>H<sub>18</sub>ClNH<sup>+</sup> 320.1201; Found 320.1205.



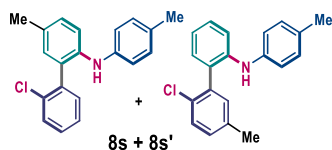

Compound, **8s+8s'**: yellow sticky liquid; eluent (1% ethyl acetate in hexane). **Yield:** 72% (2.4:1 rr) (44 mg); **<sup>1</sup>H NMR (400 MHz, Chloroform-*d*)**  $\delta$ : 7.43 – 7.38 (m, 1H), 7.30 – 7.28 (m, 2.52H), 7.26 – 7.19 (m, 3.96H), 7.18 – 7.12 (m, 2.92H), 7.09 – 6.93 (m, 16.96H), 6.91 – 6.80 (m, 10.22H), 5.17 (s, 2.41H), 5.05 (s, 1H), 2.27 (s, 7.19H), 2.25 (s, 3H), 2.21 (s, 7.21H), 2.19 (s, 3H). **<sup>13</sup>C NMR (101 MHz, Chloroform-*d*)**  $\delta$ : 142.0, 141.2, 140.4, 139.2, 138.1, 137.6, 137.3, 132.8, 132.2, 131.5, 131.4, 131.2, 130.8, 130.1, 130.0, 129.90, 129.85, 129.7, 129.6, 129.2, 128.9, 128.2, 127.3, 120.3, 119.8, 119.0, 117.3, 115.7, 21.0, 20.8, 20.8, 20.7. **HRMS (ESI/TOF-Q) m/z:** [M+H]<sup>+</sup> Calculated for C<sub>20</sub>H<sub>18</sub>ClNH<sup>+</sup> 308.1201; Found 308.1194.

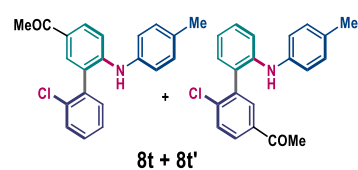

Compound, **8t+8t'**: yellow sticky liquid; eluent (1% ethyl acetate in hexane). **Yield:** 70% (2.3:1 rr) (47 mg); **<sup>1</sup>H NMR (500 MHz, Chloroform-*d*)**  $\delta$ : 7.94 – 7.90 (m, 2.02H), 7.87 – 7.84 (m, 2.07H), 7.76 (t, *J* = 1.9 Hz, 2.03H), 7.60 – 7.53 (m, 3.00H), 7.41 – 7.36 (m, 6.54H), 7.31 – 7.26 (m, 2.42H), 7.16 – 7.12 (m, 7.80H), 7.06 – 7.04 (m, 6.38H), 7.00 – 6.93 (m, 3.82H), 5.59 (s, 2.34H), 5.12 (s, 1.00H), 2.57 (s, 3.02H), 2.53 (s, 6.90H), 2.33 (s, 6.92H), 2.28 (s, 3.09H). **<sup>13</sup>C NMR (101 MHz, Chloroform-*d*)**  $\delta$ : 196.9, 196.4, 147.2, 142.0, 140.3, 139.7, 138.5, 137.9, 136.7, 136.3, 134.4, 134.2, 132.4, 132.3, 131.9, 131.7, 130.8, 130.4, 130.3, 130.3, 130.2, 130.0, 129.9, 129.5, 128.9, 128.2, 127.8, 125.8, 123.0, 120.3, 120.1, 116.6, 112.4, 26.7, 26.3, 21.0, 20.8. **HRMS (ESI/TOF-Q) m/z:** [M+H]<sup>+</sup> Calculated for C<sub>21</sub>H<sub>18</sub>ClNOH<sup>+</sup> 336.1150; Found 336.1151.

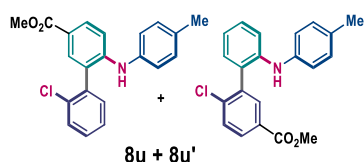

Compound, **8u+8u'**: yellow sticky liquid; eluent (1% ethyl acetate in hexane). **Yield:** 75% (2:1) (51 mg); **for major isomer;** **<sup>1</sup>H NMR (500 MHz, Chloroform-*d*)**  $\delta$ : 7.91 – 7.89 (m, 1H), 7.82 – 7.81 (m, 1H), 7.53 – 7.52 (m, 1H), 7.40 – 7.36 (m, 3H), 7.14 – 7.12 (m, 3H), 7.05 – 7.03 (m, 2H), 5.53 (s, 1H), 3.86 (s, 3H), 2.32 (s, 3H). **<sup>13</sup>C NMR (126 MHz, Chloroform-*d*)**  $\delta$ : 167.1, 146.9, 138.1, 136.7, 134.4, 133.9, 132.7, 132.4, 131.2, 130.3, 130.2, 129.8, 127.7, 125.9, 122.7, 120.2, 112.6, 51.9, 21.0. **HRMS (ESI/TOF-Q) m/z:** [M+H]<sup>+</sup> Calculated for C<sub>21</sub>H<sub>19</sub>ClNO<sub>2</sub>H<sup>+</sup> 352.1099; Found 352.1101. **for minor isomer;** **<sup>1</sup>H NMR (400 MHz, Chloroform-*d*)**  $\delta$ : 8.05 (d, *J* = 2.1 Hz, 1H), 7.98 (dd, *J* = 8.4, 2.2 Hz, 1H), 7.57 (d, *J* = 8.4 Hz, 1H), 7.28 – 7.25 (m, 2H), 7.13 (dd, *J* = 7.3, 1.2 Hz, 1H), 7.06 – 7.04 (m, 2H), 6.98 – 6.93 (m, 3H), 5.11 (s, 1H), 3.91 (s, 3H), 2.28 (s, 3H). **<sup>13</sup>C NMR (101 MHz, Chloroform-*d*)**  $\delta$ : 166.3, 142.0, 140.1, 139.5, 138.4, 133.4, 131.7, 130.8, 130.3, 130.2, 129.9, 129.5, 129.4, 127.3, 120.2, 120.1, 116.18, 52.5, 20.9. **HRMS (ESI/TOF-Q) m/z:** [M+H]<sup>+</sup> Calculated for C<sub>21</sub>H<sub>19</sub>ClNO<sub>2</sub>H<sup>+</sup> 352.1099; Found 352.1101.

## General procedure for the synthesis of compounds 9a-9d:

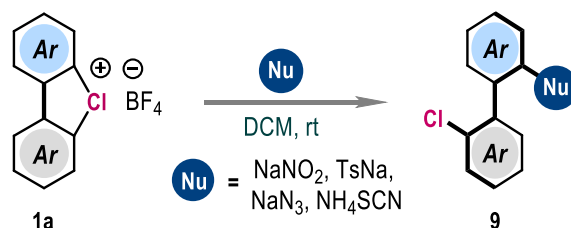

A 16x100 mm oven dried reaction tube equipped with a magnetic stir was charged with  $\lambda^3$ -chlorane **1a** (0.2 mmol, 1.0 equiv) and corresponding nucleophile (0.2 mmol, 1.0 equiv) under  $\text{N}_2$  atmosphere. Then, dry DCM (1.5 mL) was added via syringe. The reaction mixture was allowed to stir at rt. After completion of the reaction (8–18 h, TLC monitored), volatiles were removed under reduced pressure and the crude product was purified by silica gel column chromatography to provide pure product **9**.

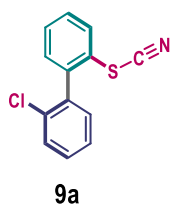

Compound, **9a**: yellow liquid; eluent (1% ethyl acetate in hexane). **Yield**: 91% (45 mg);  $^1\text{H}$  NMR (400 MHz, Chloroform-*d*)  $\delta$ : 7.71 (d,  $J = 7.2$  Hz, 1H), 7.42 – 7.36 (m, 3H), 7.33 – 7.26 (m, 2H), 7.22 (d,  $J = 6.9$  Hz, 1H), 7.19 – 7.16 (m, 1H).  $^{13}\text{C}$  NMR (101 MHz, Chloroform-*d*)  $\delta$ : 140.3, 137.3, 133.6, 131.3 (2 $\times$ C), 130.43, 130.36, 130.0, 129.9, 129.5, 127.2, 125.1, 110.8. **HRMS (ESI/TOF-Q) m/z**:  $[\text{M}+\text{H}]^+$  Calculated for  $\text{C}_{13}\text{H}_8\text{ClN}_2\text{S}^+$  246.0139; Found 246.0140.

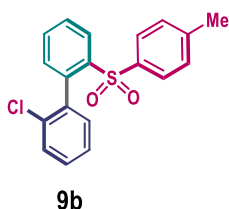

Compound, **9b**: yellow liquid; eluent (3% ethyl acetate in hexane). **Yield**: 85% (58 mg);  $^1\text{H}$  NMR (400 MHz, Chloroform-*d*)  $\delta$ : 8.45 – 8.40 (m, 1H), 7.63 – 7.58 (m, 2H), 7.31 – 7.25 (m, 3H), 7.22 – 7.16 (m, 4H), 7.04 (d,  $J = 8.0$  Hz, 2H), 2.35 (s, 3H).  $^{13}\text{C}$  NMR (101 MHz, Chloroform-*d*)  $\delta$ : 143.9, 140.0, 138.8, 137.5, 136.5, 134.0, 133.1, 132.91, 132.87, 129.6, 129.3, 128.91, 128.86, 128.5, 128.2, 125.7, 21.7. **HRMS (ESI/TOF-Q) m/z**:  $[\text{M}+\text{H}]^+$  Calculated for  $\text{C}_{19}\text{H}_{15}\text{ClO}_2\text{S}^+$  343.0554; Found 343.0559.

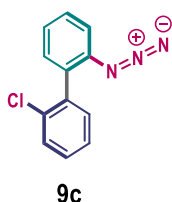

Compound, **9c**: colourless liquid; eluent (1% ethyl acetate in hexane). **Yield**: 90% (41 mg);  $^1\text{H}$  NMR (400 MHz, Chloroform-*d*)  $\delta$ : 7.43 – 7.36 (m, 2H), 7.28 – 7.23 (m, 2H), 7.20 – 7.12 (m, 4H).  $^{13}\text{C}$  NMR (101 MHz, Chloroform-*d*)  $\delta$ : 138.3, 137.3, 133.8, 131.6, 131.5, 131.4, 129.6, 129.5, 129.3, 126.6, 124.7, 118.6. **HRMS (ESI/TOF-Q) m/z**:  $[\text{M}+\text{H}]^+$  Calculated for  $\text{C}_{12}\text{H}_8\text{ClN}_3\text{H}^+$  230.0480; Found 230.0482.

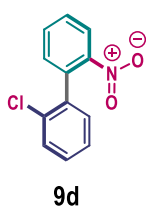

Compound, **9d**: yellow liquid; eluent (2% ethyl acetate in hexane). **Yield**: 88% (41 mg);  $^1\text{H}$  NMR (400 MHz, Chloroform-*d*)  $\delta$ : 7.98 (d,  $J = 8.1$  Hz, 1H), 7.56 (t,  $J = 7.6$  Hz, 1H), 7.45 (t,  $J = 7.8$  Hz, 1H), 7.35 – 7.33 (m, 1H), 7.24 – 7.21 (m, 2H), 7.16 – 7.14 (m, 2H).  $^{13}\text{C}$  NMR (101 MHz, Chloroform-*d*)  $\delta$ : 148.8, 137.3, 134.5, 133.1, 132.9, 132.5, 130.0, 129.6 (2 $\times$ C), 129.1, 127.1, 124.6. **HRMS (ESI/TOF-Q) m/z**:  $[\text{M}+\text{H}]^+$  Calculated for  $\text{C}_{12}\text{H}_8\text{ClNO}_2\text{H}^+$  234.0316; Found 234.0322.

## General procedure for the synthesis of compounds 10a-10p:

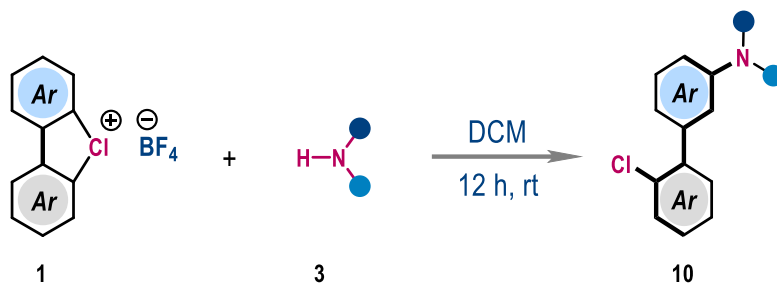

A 16x100 mm oven dried reaction tube equipped with a magnetic stir was charged with  $\lambda^3$ -chlorane **1** (0.2 mmol, 1.0 equiv) and corresponding secondary amine **3** (0.3 mmol, 1.5 equiv) under  $\text{N}_2$  atmosphere. Then, dry DCM (1.5 mL) was added via syringe. The reaction mixture was allowed to stir at rt for 12 h. After completion of the reaction (TLC monitored), volatiles were removed under reduced pressure and the crude product was purified by silica gel chromatography to provide pure product **10**.

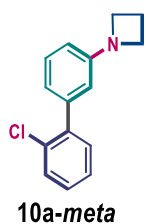

Compound, **10a-meta**: colourless sticky liquid; eluent (1% ethyl acetate in hexane). **Yield:** 60% (29 mg);  **$^1\text{H NMR}$  (400 MHz, Chloroform-*d*)**  $\delta$ : 7.45 (dd,  $J = 7.2, 1.9$  Hz, 1H), 7.35 (dd,  $J = 7.3, 2.2$  Hz, 1H), 7.31 – 7.25 (m, 3H), 6.79 (d,  $J = 7.5$  Hz, 1H), 6.50 – 6.46 (m, 2H), 3.91 (t,  $J = 7.2$  Hz, 4H), 2.37 (p,  $J = 7.2$  Hz, 2H).  **$^{13}\text{C NMR}$  (101 MHz, Chloroform-*d*)**  $\delta$ : 152.0, 141.3, 140.2, 132.7, 131.5, 130.0, 128.7, 128.4, 126.8, 118.7, 112.6, 110.7, 52.6, 17.2. **HRMS (ESI/TOF-Q) m/z:**  $[\text{M}+\text{H}]^+$  Calculated for  $\text{C}_{15}\text{H}_{14}\text{ClNH}^+$  244.0888; Found 244.0886.

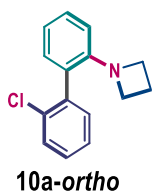

Compound, **10a-ortho**: colourless sticky liquid; eluent (1% ethyl acetate in hexane). **Yield:** 20% (9 mg);  **$^1\text{H NMR}$  (400 MHz, Chloroform-*d*)**  $\delta$ : 7.46 – 7.41 (m, 1H), 7.36 – 7.33 (m, 1H), 7.29 – 7.23 (m, 3H), 7.04 (dd,  $J = 7.5, 1.6$  Hz, 1H), 6.82 (td,  $J = 7.4, 1.2$  Hz, 1H), 6.55 (dd,  $J = 8.2, 1.2$  Hz, 1H), 3.51 (q,  $J = 7.2$  Hz, 2H), 3.41 (q,  $J = 7.2$  Hz, 2H), 2.08 (p,  $J = 7.2$  Hz, 2H).  **$^{13}\text{C NMR}$  (101 MHz, Chloroform-*d*)**  $\delta$ : 145.0, 140.0, 134.3, 132.6, 131.5, 129.4, 128.6, 128.5, 126.3, 125.0, 117.7, 112.8, 53.6, 17.1. **HRMS (ESI/TOF-Q) m/z:**  $[\text{M}+\text{H}]^+$  Calculated for  $\text{C}_{15}\text{H}_{14}\text{ClNH}^+$  244.0888; Found 244.0886.

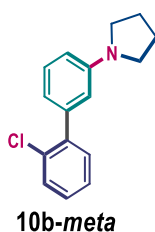

Compound, **10b-meta**: colourless sticky liquid; eluent (1% ethyl acetate in hexane). **Yield:** 74% (38 mg);  **$^1\text{H NMR}$  (400 MHz, Chloroform-*d*)**  $\delta$ : 7.46 (d,  $J = 7.7$  Hz, 1H), 7.39 – 7.37 (m, 1H), 7.30 – 7.26 (m, 3H), 6.71 (d,  $J = 7.6$  Hz, 1H), 6.61 – 6.59 (m, 2H), 3.34 – 3.30 (m, 4H), 2.03 – 1.99 (m, 4H).  **$^{13}\text{C NMR}$  (101 MHz, Chloroform-*d*)**  $\delta$ : 147.7, 141.7, 140.4, 132.7, 131.5, 129.9, 128.9, 128.3, 126.7, 116.7, 112.8, 111.0, 47.8, 25.6. **HRMS (ESI/TOF-Q) m/z:**  $[\text{M}+\text{H}]^+$  Calculated for  $\text{C}_{16}\text{H}_{16}\text{ClNH}^+$  258.1044; Found 258.1045.

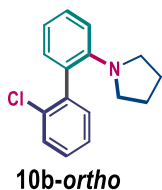

Compound, **10b-ortho**: colourless sticky liquid; eluent (1% ethyl acetate in hexane). **Yield:** 9% (5 mg); **<sup>1</sup>H NMR (400 MHz, Chloroform-*d*)**  $\delta$ : 7.42 – 7.38 (m, 1H), 7.34 – 7.31 (m, 1H), 7.24 – 7.18 (m, 3H), 7.06 (d,  $J = 7.5$  Hz, 1H), 6.82 – 6.76 (m, 2H), 2.94 – 2.83 (m, 4H), 1.79 – 1.70 (m, 4H). **<sup>13</sup>C NMR (101 MHz, Chloroform-*d*)**  $\delta$ : 147.8, 142.2, 134.0, 132.5, 132.3, 129.3, 128.6, 128.0, 126.3 (2 $\times$ C), 117.0, 114.2, 50.3, 25.8. **HRMS (ESI/TOF-Q) m/z:** [M+H]<sup>+</sup> Calculated for C<sub>16</sub>H<sub>16</sub>ClNH<sup>+</sup> 258.1044; Found 258.1045.

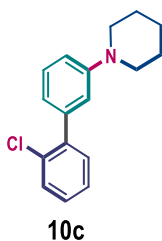

Compound, **10c**: colourless sticky liquid; eluent (1% ethyl acetate in hexane). **Yield:** 85% (46 mg); **<sup>1</sup>H NMR (400 MHz, Chloroform-*d*)**  $\delta$ : 7.46 (d,  $J = 7.5$  Hz, 1H), 7.36 (d,  $J = 7.4$  Hz, 1H), 7.33 – 7.26 (m, 3H), 7.00 (s, 1H), 6.96 (d,  $J = 8.5$  Hz, 1H), 6.89 (d,  $J = 7.6$  Hz, 1H), 3.22 – 3.19 (m, 4H), 1.74 – 1.70 (m, 4H), 1.60 – 1.57 (m, 2H). **<sup>13</sup>C NMR (101 MHz, Chloroform-*d*)**  $\delta$ : 152.0, 141.3, 140.3, 132.6, 131.5, 130.0, 128.8, 128.4, 126.8, 120.4, 117.9, 115.7, 50.7, 26.0, 24.4. **HRMS (ESI/TOF-Q) m/z:** [M+H]<sup>+</sup> Calculated for C<sub>17</sub>H<sub>18</sub>ClNH<sup>+</sup> 272.1201; Found 272.1209.

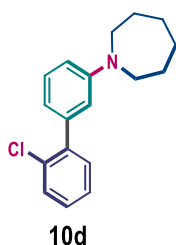

Compound, **10d**: colourless sticky liquid; eluent (1% ethyl acetate in hexane). **Yield:** 90% (52 mg); **<sup>1</sup>H NMR (400 MHz, Chloroform-*d*)**  $\delta$ : 7.48 – 7.46 (m, 1H), 7.39 (d,  $J = 7.4$  Hz, 1H), 7.33 – 7.26 (m, 3H), 6.75 – 6.68 (m, 3H), 3.50 – 3.47 (m, 4H), 1.81 – 1.80 (m, 4H), 1.58 (brs, 4H). **<sup>13</sup>C NMR (101 MHz, Chloroform-*d*)**  $\delta$ : 148.6, 141.8, 140.5, 132.7, 131.5, 130.0, 129.0, 128.3, 126.8, 116.4, 112.6, 110.6, 49.3, 28.0, 27.3. **HRMS (ESI/TOF-Q) m/z:** [M+H]<sup>+</sup> Calculated for C<sub>18</sub>H<sub>20</sub>ClNH<sup>+</sup> 286.1357; Found 286.1363.

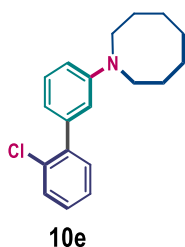

Compound, **10e**: colourless sticky liquid; eluent (1% ethyl acetate in hexane). **Yield:** 88% (53 mg); **<sup>1</sup>H NMR (400 MHz, Chloroform-*d*)**  $\delta$ : 7.44 (d,  $J = 7.6$  Hz, 1H), 7.37 (d,  $J = 7.3$  Hz, 1H), 7.30 – 7.23 (m, 3H), 6.70 – 6.67 (m, 3H), 3.47 – 3.44 (m, 4H), 1.76 – 1.74 (m, 4H), 1.58 – 1.55 (m, 6H). **<sup>13</sup>C NMR (101 MHz, Chloroform-*d*)**  $\delta$ : 148.0, 141.8, 140.4, 132.7, 131.5, 130.0, 128.9, 128.3, 126.8, 116.3, 112.6, 110.5, 50.9, 27.4, 27.3, 27.1. **HRMS (ESI/TOF-Q) m/z:** [M+H]<sup>+</sup> Calculated for C<sub>19</sub>H<sub>22</sub>ClNH<sup>+</sup> 300.1514; Found 300.1514.

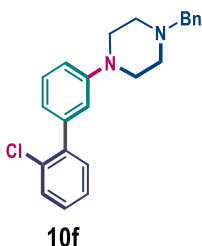

Compound, **10f**: colourless sticky liquid; eluent (3% ethyl acetate in hexane). **Yield:** 82% (59 mg); **<sup>1</sup>H NMR (400 MHz, Chloroform-*d*)**  $\delta$ : 7.37 – 7.35 (m, 1H), 7.28 – 7.14 (m, 9H), 6.89 (s, 1H), 6.85 – 6.81 (m, 2H), 3.49 (s, 2H), 3.17 – 3.15 (m, 4H), 2.55 – 2.52 (m, 4H). **<sup>13</sup>C NMR (101 MHz, Chloroform-*d*)**  $\delta$ : 151.1, 141.1, 140.4, 138.0, 132.6, 131.4, 130.0, 129.4, 128.9, 128.5, 128.4, 127.3, 126.8, 120.8, 117.5, 115.3, 63.2, 53.2, 49.2. **HRMS (ESI/TOF-Q) m/z:** [M+H]<sup>+</sup> Calculated for C<sub>23</sub>H<sub>23</sub>ClN<sub>2</sub>H<sup>+</sup> 363.1623; Found 363.1625.

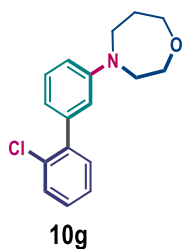

Compound, **10g**: colourless sticky liquid; eluent (1% ethyl acetate in hexane). **Yield**: 82% (47 mg); **<sup>1</sup>H NMR (400 MHz, Chloroform-*d*)**  $\delta$ : 7.46 (d,  $J = 7.6$  Hz, 1H), 7.37 (d,  $J = 7.3$  Hz, 1H), 7.32 – 7.26 (m, 3H), 6.76 – 6.73 (m, 3H), 3.86 – 3.84 (m, 2H), 3.73 – 3.70 (m, 2H), 3.67 – 3.63 (m, 4H), 2.08 – 2.04 (m, 2H). **<sup>13</sup>C NMR (101 MHz, Chloroform-*d*)**  $\delta$ : 148.0, 141.4, 140.7, 132.6, 131.4, 130.0, 129.3, 128.5, 126.8, 117.5, 113.3, 111.2, 70.22, 70.16, 52.3, 47.7, 29.3. **HRMS (ESI/TOF-Q) *m/z***:  $[M+H]^+$  Calculated for  $C_{17}H_{18}ClNOH^+$  288.1150; Found 288.1155.

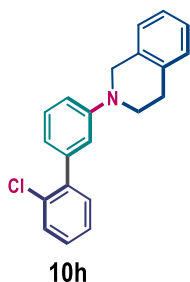

Compound, **10h**: colourless sticky liquid; eluent (1% ethyl acetate in hexane). **Yield**: 79% (51 mg); **<sup>1</sup>H NMR (400 MHz, Chloroform-*d*)**  $\delta$ : 7.48 – 7.36 (m, 4H), 7.26 – 7.19 (m, 3H), 7.13 – 7.09 (m, 3H), 7.05 – 7.01 (m, 2H), 4.22 – 4.13 (m, 2H), 3.12 – 2.96 (m, 2H), 2.47 – 2.44 (m, 2H). **<sup>13</sup>C NMR (101 MHz, Chloroform-*d*)**  $\delta$ : 150.8, 140.0, 135.2, 135.0, 133.4, 133.3, 132.1, 132.0, 129.9, 129.0, 128.9, 128.3, 126.6, 126.5, 126.1, 125.7, 122.1, 118.8, 52.7, 50.5, 29.2. **HRMS (ESI/TOF-Q) *m/z***:  $[M+H]^+$  Calculated for  $C_{21}H_{18}ClNH^+$  320.1201; Found 320.1203.

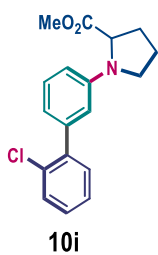

Compound, **10i**: colourless sticky liquid; eluent (1% ethyl acetate in hexane). **Yield**: 72% (45 mg); **<sup>1</sup>H NMR (400 MHz, Chloroform-*d*)**  $\delta$ : 7.45 (dd,  $J = 7.4, 1.9$  Hz, 1H), 7.35 (dd,  $J = 7.1, 2.2$  Hz, 1H), 7.31 – 7.24 (m, 3H), 6.77 (d,  $J = 7.5$  Hz, 1H), 6.61 (s, 1H), 6.57 (dd,  $J = 8.2, 2.6$  Hz, 1H), 4.29 (dd,  $J = 8.5, 2.1$  Hz, 1H), 3.73 (s, 3H), 3.64 – 3.59 (m, 1H), 3.43 – 3.37 (m, 1H), 2.35 – 2.23 (m, 1H), 2.21 – 2.12 (m, 2H), 2.10 – 2.00 (m, 1H). **<sup>13</sup>C NMR (101 MHz, Chloroform-*d*)**  $\delta$ : 175.0, 146.5, 141.4, 140.5, 132.7, 131.5, 130.0, 129.1, 128.4, 126.8, 118.1, 113.3, 111.4, 61.0, 52.3, 48.5, 31.1, 24.0. **HRMS (ESI/TOF-Q) *m/z***:  $[M+H]^+$  Calculated for  $C_{18}H_{18}ClNO_2H^+$  316.1099; Found 316.1099.

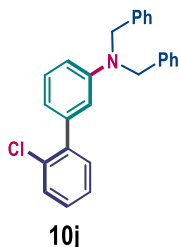

Compound, **10j**: colourless sticky liquid; eluent (1% ethyl acetate in hexane). **Yield**: 81% (62 mg); **<sup>1</sup>H NMR (400 MHz, Chloroform-*d*)**  $\delta$ : 7.40 – 7.29 (m, 8H), 7.25 – 7.07 (m, 7H), 6.81 (s, 1H), 6.75 (d,  $J = 6.9$  Hz, 2H), 4.65 (s, 4H). **<sup>13</sup>C NMR (101 MHz, Chloroform-*d*)**  $\delta$ : 149.1, 141.2, 140.4, 138.6, 132.6, 131.5, 130.0, 129.0, 128.8, 128.4, 127.0, 126.9, 126.8, 118.1, 114.0, 111.9, 54.3. **HRMS (ESI/TOF-Q) *m/z***:  $[M+H]^+$  Calculated for  $C_{26}H_{22}ClNH^+$  384.1514; Found 384.1517.

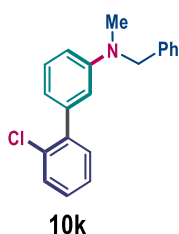

Compound, **10k**: colourless sticky liquid; eluent (1% ethyl acetate in hexane). **Yield**: 68% (42 mg); **<sup>1</sup>H NMR (400 MHz, Chloroform-*d*)**  $\delta$ : 7.43 (dd,  $J = 7.2, 2.0$  Hz, 1H), 7.34 – 7.28 (m, 4H), 7.27 – 7.21 (m, 5H), 6.82 (s, 1H), 6.78 – 6.75 (m, 2H), 4.55 (s, 2H), 3.03 (s, 3H). **<sup>13</sup>C NMR (101 MHz, Chloroform-*d*)**  $\delta$ : 149.6, 141.5, 140.4, 139.1, 132.7, 131.5, 130.0, 129.0, 128.7, 128.4, 127.03, 126.96, 126.8, 117.9, 113.8, 111.8, 56.9, 38.7. **HRMS (ESI/TOF-Q) *m/z***:  $[M+H]^+$  Calculated for  $C_{20}H_{18}ClNH^+$  308.1201; Found 308.1209.

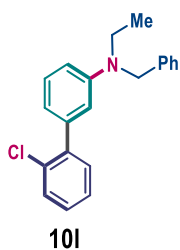

Compound, **10l**: colourless sticky liquid; eluent (1% ethyl acetate in hexane). **Yield**: 71% (46 mg); **<sup>1</sup>H NMR (400 MHz, Chloroform-*d*)**  $\delta$ : 7.40 (d,  $J = 7.7$  Hz, 1H), 7.30 – 7.21 (m, 9H), 6.78 (s, 1H), 6.73 (d,  $J = 7.8$  Hz, 2H), 4.53 (s, 2H), 3.49 – 3.47 (m, 2H), 1.23 – 1.20 (m, 3H). **<sup>13</sup>C NMR (126 MHz, Chloroform-*d*)**  $\delta$ : 141.3, 140.4, 132.6, 131.5, 130.0, 129.0, 128.7 (2 $\times$ C), 128.4, 127.0, 126.8, 122.3, 120.2, 117.6, 113.8, 111.8, 54.4, 45.5, 12.3. **HRMS (ESI/TOF-Q) m/z**: [M+H]<sup>+</sup> Calculated for C<sub>21</sub>H<sub>20</sub>ClNH<sup>+</sup> 322.1357; Found 322.1369.

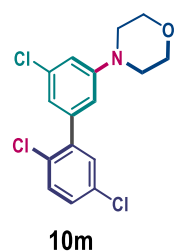

Compound, **10m**: colourless sticky liquid; eluent (1% ethyl acetate in hexane). **Yield**: 90% (62 mg); **<sup>1</sup>H NMR (400 MHz, Chloroform-*d*)**  $\delta$ : 7.42 (d,  $J = 8.6$  Hz, 1H), 7.30 – 7.26 (m, 2H), 7.23 (d,  $J = 2.6$  Hz, 1H), 7.21 – 7.17 (m, 2H), 3.67 (t,  $J = 5.0$  Hz, 4H), 3.54 (brs, 4H). **<sup>13</sup>C NMR (101 MHz, Chloroform-*d*)**  $\delta$ : 146.2, 139.7, 134.9, 132.2, 132.0, 131.6, 131.4, 130.18, 130.16, 129.3, 128.7, 118.5, 66.41, 66.39. **HRMS (ESI/TOF-Q) m/z**: [M+H]<sup>+</sup> Calculated for C<sub>16</sub>H<sub>14</sub>Cl<sub>3</sub>NOH<sup>+</sup> 342.0214; Found 342.0218.

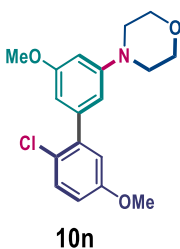

Compound, **10n**: colourless sticky liquid; eluent (1% ethyl acetate in hexane). **Yield**: 84% (56 mg); **<sup>1</sup>H NMR (400 MHz, Chloroform-*d*)**  $\delta$ : 7.45 (d,  $J = 8.9$  Hz, 1H), 7.23 (d,  $J = 7.1$  Hz, 1H), 6.90 (dd,  $J = 8.9, 2.9$  Hz, 1H), 6.82 (d,  $J = 3.1$  Hz, 1H), 6.79 – 6.76 (m, 2H), 3.80 (s, 3H), 3.75 (s, 3H), 3.69 (t,  $J = 5.0$  Hz, 4H), 3.50 (brs, 4H). **<sup>13</sup>C NMR (101 MHz, Chloroform-*d*)**  $\delta$ : 158.1, 157.8, 141.4, 140.2, 136.3, 129.6, 125.4, 118.2, 116.9, 115.2, 114.8, 114.4, 66.5, 55.7 (2 $\times$ C), 48.1. **HRMS (ESI/TOF-Q) m/z**: [M+H]<sup>+</sup> Calculated for C<sub>18</sub>H<sub>20</sub>ClNO<sub>3</sub>H<sup>+</sup> 334.1204; Found 334.1205.

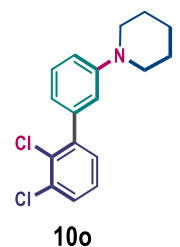

Compound, **10o**: colourless sticky liquid; eluent (1% ethyl acetate in hexane). **Yield**: 76% (46 mg); **<sup>1</sup>H NMR (400 MHz, Chloroform-*d*)**  $\delta$ : 7.44 (dd,  $J = 7.2, 2.4$  Hz, 1H), 7.30 (t,  $J = 7.8$  Hz, 1H), 7.26 – 7.20 (m, 2H), 6.98 – 6.94 (m, 2H), 6.84 – 6.82 (m, 1H), 3.20 (t,  $J = 5.4$  Hz, 4H), 1.75 – 1.69 (m, 4H), 1.62 – 1.57 (m, 2H). **<sup>13</sup>C NMR (101 MHz, Chloroform-*d*)**  $\delta$ : 152.0, 143.7, 140.2, 133.6, 131.3, 129.6, 129.3, 128.9, 127.1, 120.0, 117.6, 115.9, 50.6, 26.0, 24.5. **HRMS (ESI/TOF-Q) m/z**: [M+H]<sup>+</sup> Calculated for C<sub>17</sub>H<sub>17</sub>Cl<sub>2</sub>NH<sup>+</sup> 306.0811; Found 306.0810.

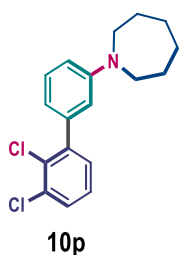

Compound, **10p**: colourless sticky liquid; eluent (1% ethyl acetate in hexane). **Yield**: 79% (50 mg); **<sup>1</sup>H NMR (400 MHz, Chloroform-*d*)**  $\delta$ : 7.44 (dd,  $J = 7.7, 1.9$  Hz, 1H), 7.28 – 7.20 (m, 3H), 6.73 (dd,  $J = 8.3, 2.7$  Hz, 1H), 6.69 (s, 1H), 6.63 (d,  $J = 7.6$  Hz, 1H), 3.48 (t,  $J = 6.0$  Hz, 4H), 1.81 – 1.79 (m, 4H), 1.59 – 1.56 (m, 4H). **<sup>13</sup>C NMR (101 MHz, Chloroform-*d*)**  $\delta$ : 148.7, 144.2, 140.4, 133.5, 131.3, 129.6, 129.2, 129.1, 127.1, 116.2, 112.4, 110.9, 49.3, 27.9, 27.3. **HRMS (ESI/TOF-Q) m/z**: [M+H]<sup>+</sup> Calculated for C<sub>18</sub>H<sub>19</sub>Cl<sub>2</sub>NH<sup>+</sup> 320.0967; Found 320.0976.

## General procedure for the synthesis of compounds 11/12:

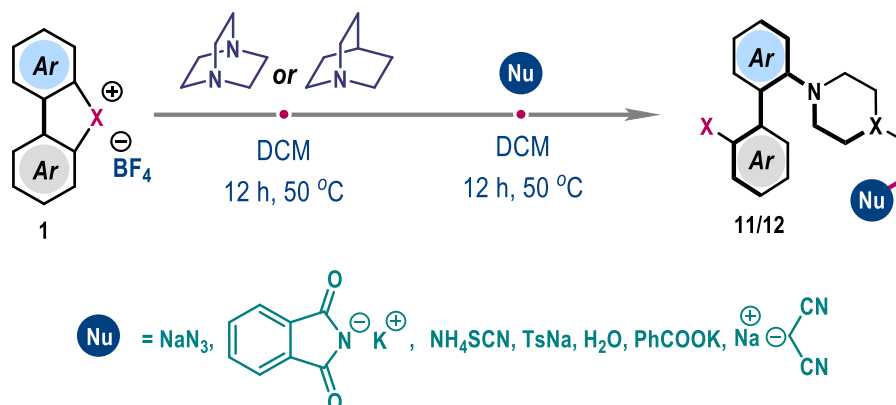

A 16x100 mm oven dried reaction tube equipped with a magnetic stir was charged with  $\lambda^3$ -chlorane **1a** (0.2 mmol, 1.0 equiv) and tertiary amine DABCO or quinuclidine (0.2 mmol, 1.0 equiv) under  $\text{N}_2$  atmosphere. Then, dry DCM (1.5 mL) was added via syringe. The reaction mixture was allowed to stir at 50 °C for 12 h. Then, the corresponding nucleophile (1.2 equiv; for water, 6 equiv) was added in the reaction mixture and allowed to stir further for 12 h at 50 °C. After completion of the reaction, volatiles were removed under reduced pressure and the crude product was purified by silica gel column chromatography to provide pure product **11/12**.

Compound **11h** was prepared similarly using  $\lambda^3$ -bromane (**1a**), DABCO, and  $\text{NaN}_3$ .

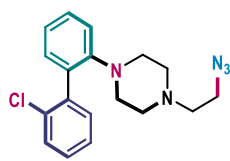

**11a**

Compound, **11a**: yellow sticky liquid; eluent (4% ethyl acetate in hexane). **Yield**: 84% (57 mg);  $^1\text{H NMR}$  (400 MHz, Chloroform-*d*)  $\delta$ : 7.48 – 7.45 (m, 1H), 7.39 – 7.33 (m, 2H), 7.31 – 7.24 (m, 2H), 7.20 (dd,  $J = 7.7, 1.8$  Hz, 1H), 7.11 – 7.08 (m, 2H), 3.30 (t,  $J = 6.1$  Hz, 2H), 2.86 (t,  $J = 4.9$  Hz, 4H), 2.52 (t,  $J = 6.1$  Hz, 2H), 2.33 – 2.31 (m, 4H).  $^{13}\text{C NMR}$  (101 MHz, Chloroform-*d*)  $\delta$ : 150.9, 139.9, 134.0, 133.6, 132.0, 131.5, 129.8, 129.1, 128.2, 126.5, 122.7, 119.2, 57.2, 53.5, 51.2, 48.3. **HRMS (ESI/TOF-Q) m/z**:  $[\text{M}+\text{H}]^+$  Calculated for  $\text{C}_{18}\text{H}_{20}\text{ClN}_5\text{H}^+$  342.1480; Found 342.1482.

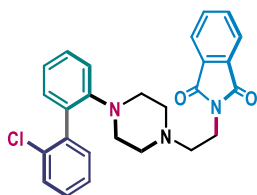

**11b**

Compound, **11b**: yellow sticky liquid; eluent (5% ethyl acetate in hexane). **Yield**: 66% (59 mg);  $^1\text{H NMR}$  (400 MHz, Chloroform-*d*)  $\delta$ : 7.87 – 7.78 (m, 2H), 7.77 – 7.67 (m, 2H), 7.47 – 7.43 (m, 1H), 7.38 – 7.35 (m, 1H), 7.33 – 7.27 (m, 2H), 7.25 – 7.21 (m, 1H), 7.19 – 7.16 (m, 1H), 7.08 – 7.03 (m, 2H), 3.77 (t,  $J = 6.6$  Hz, 2H), 2.78 (t,  $J = 4.9$  Hz, 4H), 2.56 (t,  $J = 6.7$  Hz, 2H), 2.34 (brs, 4H).  $^{13}\text{C NMR}$  (101 MHz, Chloroform-*d*)  $\delta$ : 168.5, 151.0, 139.9, 134.0, 133.9, 133.5, 132.3, 132.0, 131.5, 129.8, 129.0, 128.3, 126.5, 123.3, 122.5, 119.1, 55.8, 53.3, 51.2, 35.3. **HRMS (ESI/TOF-Q) m/z**:  $[\text{M}+\text{H}]^+$  Calculated for  $\text{C}_{26}\text{H}_{24}\text{ClN}_3\text{O}_2\text{H}^+$  446.1630; Found 446.1638.

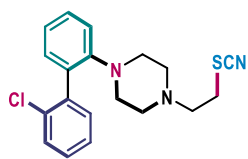

11c

Compound, **11c**: yellow sticky liquid; eluent (3% ethyl acetate in hexane). **Yield**: 78% (56 mg); **<sup>1</sup>H NMR (400 MHz, Chloroform-*d*)**  $\delta$ : 7.46 (dd,  $J = 7.2, 2.1$  Hz, 1H), 7.38 – 7.33 (m, 2H), 7.31 – 7.24 (m, 2H), 7.19 (dd,  $J = 7.5, 1.8$  Hz, 1H), 7.12 – 7.08 (m, 2H), 3.13 (t,  $J = 6.7$  Hz, 2H), 2.84 (t,  $J = 4.9$  Hz, 4H), 2.66 (t,  $J = 6.7$  Hz, 2H), 2.33 – 2.27 (m, 4H). **<sup>13</sup>C NMR (101 MHz, Chloroform-*d*)**  $\delta$ : 150.8, 139.8, 134.0, 133.6, 132.0, 131.5, 129.8, 129.1, 128.3, 126.5, 122.8, 119.2, 113.2, 56.3, 53.0, 51.1, 32.6. **HRMS (ESI/TOF-Q)  $m/z$** :  $[M+H]^+$  Calculated for  $C_{19}H_{20}ClN_3SH^+$  358.1139; Found 358.1152.

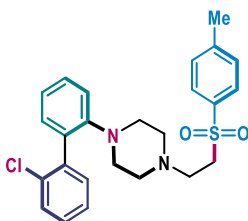

11d

Compound, **11d**: yellow sticky liquid; eluent (4% ethyl acetate in hexane). **Yield**: 65% (59 mg); **<sup>1</sup>H NMR (400 MHz, Chloroform-*d*)**  $\delta$ : 7.77 – 7.73 (m, 2H), 7.45 – 7.42 (m, 1H), 7.35 – 7.30 (m, 4H), 7.29 – 7.22 (m, 2H), 7.17 (dd,  $J = 7.6, 1.7$  Hz, 1H), 7.10 – 7.06 (m, 1H), 7.02 (d,  $J = 7.7$  Hz, 1H), 3.23 – 3.20 (m, 2H), 2.72 – 2.66 (m, 6H), 2.44 (s, 3H), 2.20 – 2.16 (m, 4H). **<sup>13</sup>C NMR (101 MHz, Chloroform-*d*)**  $\delta$ : 150.7, 144.8, 139.8, 136.8, 134.0, 133.5, 132.0, 131.6, 130.0, 129.8, 129.1, 128.3, 128.2, 126.5, 122.8, 119.1, 53.7, 53.1, 51.4, 51.0, 21.8. **HRMS (ESI/TOF-Q)  $m/z$** :  $[M+H]^+$  Calculated for  $C_{25}H_{27}ClN_2O_2SH^+$  455.1555; Found 455.1556.

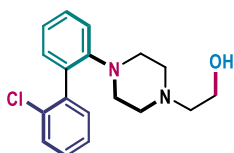

11e

Compound, **11e**: yellow sticky liquid; eluent (5% ethyl acetate in hexane). **Yield**: 83% (53 mg); **<sup>1</sup>H NMR (400 MHz, Chloroform-*d*)**  $\delta$ : 7.46 (d,  $J = 7.4$  Hz, 1H), 7.38 – 7.33 (m, 2H), 7.31 – 7.24 (m, 2H), 7.19 (d,  $J = 7.5$  Hz, 1H), 7.11 – 7.08 (m, 2H), 3.52 (t,  $J = 7.2$  Hz, 2H), 2.87 – 2.84 (m, 4H), 2.67 – 2.63 (m, 2H), 2.33 – 2.31 (m, 4H). **<sup>13</sup>C NMR (101 MHz, Chloroform-*d*)**  $\delta$ : 150.9, 139.9, 134.0, 133.6, 132.1, 131.5, 129.8, 129.1, 128.3, 126.5, 122.7, 119.2, 60.0, 53.5, 51.2, 41.0. **HRMS (ESI/TOF-Q)  $m/z$** :  $[M+H]^+$  Calculated for  $C_{18}H_{21}ClN_2OH^+$  317.1415; Found 317.1410.

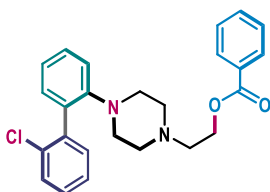

11f

Compound, **11f**: yellow sticky liquid; eluent (5% ethyl acetate in hexane). **Yield**: 58% (76 mg); **<sup>1</sup>H NMR (400 MHz, Chloroform-*d*)**  $\delta$ : 7.91 (d,  $J = 7.7$  Hz, 2H), 7.46 (t,  $J = 7.4$  Hz, 1H), 7.35 – 7.31 (m, 3H), 7.28 – 7.22 (m, 2H), 7.19 – 7.08 (m, 3H), 7.01 – 6.97 (m, 2H), 4.32 (t,  $J = 5.9$  Hz, 2H), 2.77 (t,  $J = 4.9$  Hz, 4H), 2.64 (t,  $J = 6.0$  Hz, 2H), 2.37 – 2.29 (m, 4H). **<sup>13</sup>C NMR (101 MHz, Chloroform-*d*)**  $\delta$ : 166.6, 150.9, 139.9, 133.9, 133.5, 133.1, 132.0, 131.5, 130.3, 129.8, 129.7, 129.1, 128.5, 128.3, 126.5, 122.7, 119.2, 62.5, 56.7, 53.6, 51.2. **HRMS (ESI/TOF-Q)  $m/z$** :  $[M+H]^+$  Calculated for  $C_{25}H_{25}ClN_2O_2H^+$  421.1677; Found 421.1672.

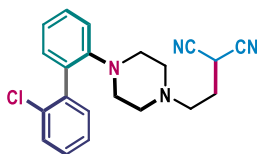

11g

Compound, **11g**: yellow sticky liquid; eluent (3% ethyl acetate in hexane). **Yield**: 60% (44 mg); **<sup>1</sup>H NMR (400 MHz, Chloroform-*d*)**  $\delta$ : 7.46 (d,  $J = 7.4$  Hz, 1H), 7.38 – 7.33 (m, 2H), 7.31 – 7.26 (m, 2H), 7.19 (d,  $J = 7.4$  Hz, 1H), 7.12 – 7.07 (m, 2H), 4.10 (t,  $J = 7.2$  Hz, 1H), 2.83 (t,  $J = 4.9$  Hz, 4H), 2.52 (t,  $J = 6.1$  Hz, 2H), 2.31 – 2.25 (m, 4H), 2.12 (q,  $J = 6.5$  Hz, 2H). **<sup>13</sup>C NMR (101 MHz, Chloroform-*d*)**  $\delta$ : 150.7, 139.9, 134.0, 133.6, 132.0, 129.8, 129.2, 128.3, 126.6, 122.9, 119.2, 113.0, 53.3 (2 $\times$ C), 51.2, 28.5, 19.9. **HRMS (ESI/TOF-Q)  $m/z$** :  $[M+H]^+$  Calculated for  $C_{21}H_{21}ClN_4H^+$  365.1528; Found 365.1529.



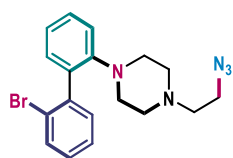

11h

Compound, **11h**: yellow sticky liquid; eluent (4% ethyl acetate in hexane). **Yield**: 39% (30 mg); **<sup>1</sup>H NMR (400 MHz, Chloroform-*d*)**  $\delta$ : 7.65 (d,  $J = 8.0$  Hz, 1H), 7.38 – 7.31 (m, 3H), 7.19 – 7.15 (m, 2H), 7.11 – 7.07 (m, 2H), 3.29 (t,  $J = 6.1$  Hz, 2H), 2.86 (t,  $J = 4.8$  Hz, 4H), 2.51 (t,  $J = 6.1$  Hz, 2H), 2.35 – 2.30 (m, 4H). **<sup>13</sup>C NMR (101 MHz, Chloroform-*d*)**  $\delta$ : 150.7, 141.9, 135.7, 133.0, 132.1, 131.5, 129.1, 128.4, 127.1, 124.1, 122.7, 119.2, 57.2, 53.5, 51.2, 48.4. **HRMS (ESI/TOF-Q) m/z**:  $[M+H]^+$  Calculated for  $C_{18}H_{20}BrN_5H^+$  386.0975; Found 386.0980.

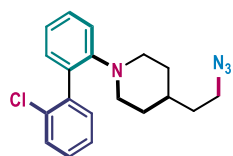

12a

Compound, **12a**: yellow sticky liquid; eluent (4% ethyl acetate in hexane). **Yield**: 67% (46 mg); **<sup>1</sup>H NMR (400 MHz, Chloroform-*d*)**  $\delta$ : 7.46 (dd,  $J = 7.4, 1.8$  Hz, 1H), 7.39 – 7.31 (m, 2H), 7.31 – 7.27 (m, 1H), 7.25 – 7.23 (m, 1H), 7.18 (dd,  $J = 7.9, 1.7$  Hz, 1H), 7.08 – 7.05 (m, 2H), 3.24 (t,  $J = 7.1$  Hz, 2H), 3.04 – 3.00 (m, 2H), 2.60 – 2.52 (m, 2H), 1.51 – 1.44 (m, 4H), 1.40 – 1.30 (m, 1H), 1.02 – 0.87 (m, 2H). **<sup>13</sup>C NMR (101 MHz, Chloroform-*d*)**  $\delta$ : 151.9, 140.1, 134.0, 133.6, 132.1, 131.5, 129.7, 129.0, 128.1, 126.4, 122.3, 119.3, 52.1, 51.9, 49.1, 35.4, 33.2, 32.5, 32.3. **HRMS (ESI/TOF-Q) m/z**:  $[M+H]^+$  Calculated for  $C_{19}H_{21}ClN_4H^+$  341.1528; Found 341.1525.

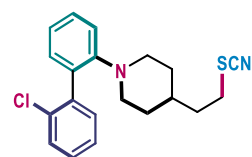

12b

Compound, **12b**: yellow sticky liquid; eluent (1% ethyl acetate in hexane). **Yield**: 65% (46 mg); **<sup>1</sup>H NMR (400 MHz, Chloroform-*d*)**  $\delta$ : 7.46 (dd,  $J = 7.4, 1.8$  Hz, 1H), 7.38 – 7.35 (m, 1H), 7.33 – 7.27 (m, 2H), 7.26 – 7.22 (m, 1H), 7.21 – 7.17 (m, 1H), 7.09 – 7.06 (m, 2H), 3.05 – 3.02 (m, 2H), 2.90 (t,  $J = 7.6$  Hz, 2H), 2.61 – 2.52 (m, 2H), 1.69 (q,  $J = 7.2$  Hz, 2H), 1.53 – 1.49 (m, 2H), 1.46 – 1.34 (m, 1H), 1.05 – 0.88 (m, 2H). **<sup>13</sup>C NMR (101 MHz, Chloroform-*d*)**  $\delta$ : 151.7, 140.0, 134.1, 133.6, 132.0, 131.5, 129.7, 129.0, 128.2, 126.5, 122.4, 119.3, 112.3, 52.1, 51.8, 36.6, 34.5, 32.3, 32.1, 31.7. **HRMS (ESI/TOF-Q) m/z**:  $[M+H]^+$  Calculated for  $C_{20}H_{21}ClN_2SH^+$  357.1187; Found 357.1188.

### Synthesis of compound 13:

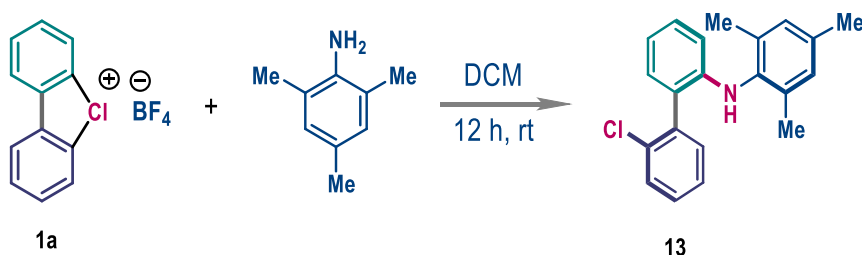

A 16x100 mm oven dried reaction tube equipped with a magnetic stir was charged with  $\lambda^3$ -chlorane **1a** (0.2 mmol, 1.0 equiv) and 2,4,6-trimethylaniline (0.2 mmol, 1.0 equiv) under  $N_2$  atmosphere. Then, dry DCM (2 mL) was added via syringe. The reaction mixture was allowed to stir at rt for 12 h. After completion, volatiles were removed under reduced pressure and the crude product was purified by silica gel column chromatography to provide pure product **13**.

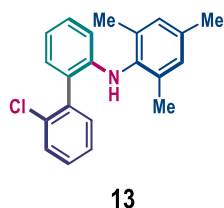

Compound, **13**: yellow sticky liquid; eluent (1% ethyl acetate in hexane). **Yield**: 65% (42 mg); **<sup>1</sup>H NMR (400 MHz, Chloroform-*d*)**  $\delta$ : 7.56 – 7.54 (m, 1H), 7.45 – 7.33 (m, 3H), 7.15 – 7.08 (m, 2H), 6.90 (s, 2H), 6.79 (t,  $J = 7.4$  Hz, 1H), 6.22 (d,  $J = 8.1$  Hz, 1H), 4.74 (s, 1H), 2.28 (s, 3H), 2.12 (s, 6H). **<sup>13</sup>C NMR (101 MHz, Chloroform-*d*)**  $\delta$ : 143.8, 138.2, 136.3, 135.6, 135.3, 134.7, 132.1, 130.17, 130.16, 129.32, 129.26, 129.2, 127.4, 125.2, 117.3, 111.5, 21.1, 18.3. **HRMS (ESI/TOF-Q)  $m/z$ : [M+H]<sup>+</sup>** Calculated for C<sub>21</sub>H<sub>20</sub>ClNH<sup>+</sup> 322.1357; Found 322.1348.

### Ligand coupling reaction in the presence of radical quencher:

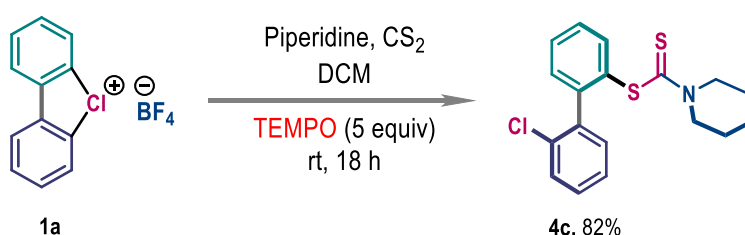

A 16x100 mm oven dried reaction tube equipped with a magnetic stir was charged with  $\lambda^3$ -chlorane **1a** (0.2 mmol, 1.0 equiv), CS<sub>2</sub> (**2a**, 2.5 equiv), piperidine (**3c**, 1.2 equiv), and TEMPO (5.0 equiv) under N<sub>2</sub> atmosphere. Then, dry DCM (2 mL) was added via syringe. The reaction mixture was allowed to stir at rt for 18 h. After completion, volatiles were removed under reduced pressure and the crude product was purified by silica gel column chromatography to provide pure product **4c** (57 mg, 82% yield).

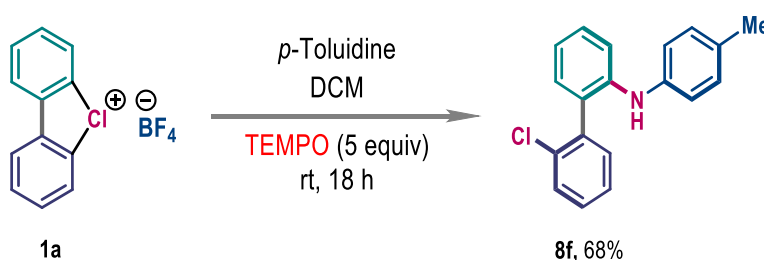

A 16x100 mm oven dried reaction tube equipped with a magnetic stir was charged with  $\lambda^3$ -chlorane **1a** (0.2 mmol, 1.0 equiv), *p*-toluidine (1.0 equiv), and TEMPO (5.0 equiv) under N<sub>2</sub> atmosphere. Then, dry DCM (2 mL) was added via syringe. The reaction mixture was allowed to stir at rt for 18 h. After completion, volatiles were removed under reduced pressure and the crude product was purified by silica gel column chromatography to provide pure product **8f** (40 mg, 68% yield).

## Aryne trapping experiment:

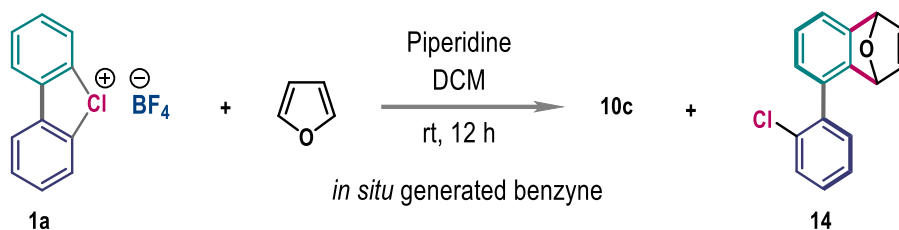

A 16x100 mm oven dried reaction tube equipped with a magnetic stir was charged with  $\lambda^3$ -chlorane **1a** (0.2 mmol, 1.0 equiv) and furan (10.0 equiv) under  $N_2$  atmosphere. Then, dry DCM (1.5 mL) was added via syringe. After that, piperidine (0.3 mmol, 1.5 equiv) was added slowly. The reaction mixture was allowed to stir at rt for 12 h. After completion of the reaction (TLC monitored), volatiles were removed under reduced pressure and the crude product was purified by silica gel chromatography to provide pure product **14**.

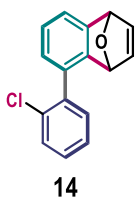

Compound, **14**: sticky liquid; eluent (1% ethyl acetate in hexane). **Yield**: 56% (29 mg);  **$^1H$  NMR (400 MHz, Chloroform-*d*)**  $\delta$ : 7.52 – 7.48 (m, 1H), 7.36 – 7.30 (m, 2H), 7.29 – 7.23 (m, 2H), 7.16 – 7.13 (m, 1H), 7.10 – 7.04 (m, 2H), 6.95 (d,  $J = 7.8$  Hz, 1H), 5.77 – 5.77 (m, 1H), 5.53 (s, 1H).  **$^{13}C$  NMR (101 MHz, Chloroform-*d*)**  $\delta$ : 149.0, 148.5, 143.0, 138.6, 132.9, 132.5, 131.6, 129.9, 129.2, 127.0, 126.4, 125.2, 119.7, 82.7, 81.8. **HRMS (ESI/TOF-Q) m/z**:  $[M+H]^+$  Calculated for  $C_{16}H_{11}ClOH^+$  255.0571; Found 255.0567.

## Investigation of aryne formation during three-component ligand coupling reaction:

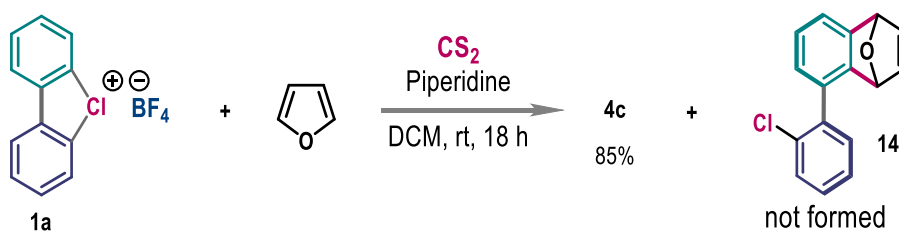

A 16x100 mm oven dried reaction tube equipped with a magnetic stir was charged with  $\lambda^3$ -chlorane **1a** (0.2 mmol, 1.0 equiv),  $CS_2$  (**2a**, 2.5 equiv), piperidine (**3c**, 1.2 equiv), and furan (10.0 equiv) under  $N_2$  atmosphere. Then, dry DCM (2 mL) was added via syringe. The reaction mixture was allowed to stir at rt for 18 h. After completion of the reaction (TLC monitored), volatiles were removed under reduced pressure and the crude product was purified by silica gel chromatography to provide pure product **4c**. We did not observe the formation of compound **14**.

## Crystallographic experimental section

**Crystallization:** Crystals of compound **4e** were obtained through slow evaporation technique at room temperature from a solution in hexane/DCM solvent combinations.

Crystal structure of compound **4e** (CCDC number: 2340860, Ellipsoid Probability 50%):

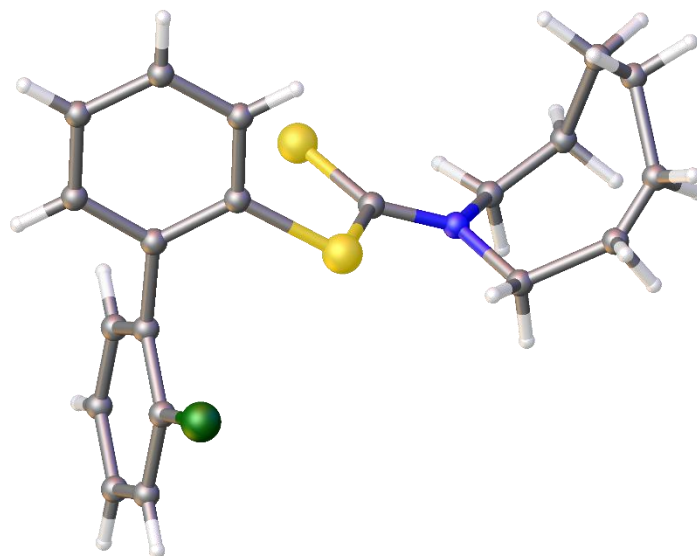

|                             |                                                                                                                       |
|-----------------------------|-----------------------------------------------------------------------------------------------------------------------|
| Identification code         | <b>4e</b>                                                                                                             |
| Empirical formula           | C <sub>20</sub> H <sub>22</sub> Cl N S <sub>2</sub>                                                                   |
| Formula weight              | 375.95                                                                                                                |
| Temperature                 | 300(2) K                                                                                                              |
| Wavelength                  | 0.71073 Å                                                                                                             |
| Crystal system, space group | Monoclinic, P 2 <sub>1</sub> /c                                                                                       |
| Unit cell dimensions        | a = 9.7904(14) Å    alpha = 90 deg.<br>b = 13.791(2) Å    beta = 99.606(5) deg.<br>c = 14.347(2) Å    gamma = 90 deg. |
| Volume                      | 1909.9(5) Å <sup>3</sup>                                                                                              |

|                                   |                                             |
|-----------------------------------|---------------------------------------------|
| Z, Calculated density             | 4, 1.307 Mg/m <sup>3</sup>                  |
| Absorption coefficient            | 0.420 mm <sup>-1</sup>                      |
| F(000)                            | 792                                         |
| Crystal size                      | 0.241 x 0.147 x 0.092 mm                    |
| Theta range for data collection   | 3.118 to 26.344 deg.                        |
| Limiting indices                  | -12<=h<=12, -17<=k<=17, -17<=l<=17          |
| Reflections collected / unique    | 55860 / 3879 [R(int) = 0.0831]              |
| Completeness to theta = 25.242    | 99.7 %                                      |
| Absorption correction             | Semi-empirical from equivalents             |
| Max. and min. transmission        | 0.7454 and 0.5420                           |
| Refinement method                 | Full-matrix least-squares on F <sup>2</sup> |
| Data / restraints / parameters    | 3879 / 0 / 263                              |
| Goodness-of-fit on F <sup>2</sup> | 1.082                                       |
| Final R indices [I>2sigma(I)]     | R1 = 0.0620, wR2 = 0.1506                   |
| R indices (all data)              | R1 = 0.0810, wR2 = 0.1619                   |
| Extinction coefficient            | n/a                                         |
| Largest diff. peak and hole       | 0.393 and -0.348 e.A <sup>-3</sup>          |

**Crystallization:** Crystals of compound **8i** obtained through slow evaporation technique at room temperature from a solution in hexane/acetonitrile solvent combinations.

Crystal structure of compound **8i** (CCDC number: 2354443, Ellipsoid Probability 50%):

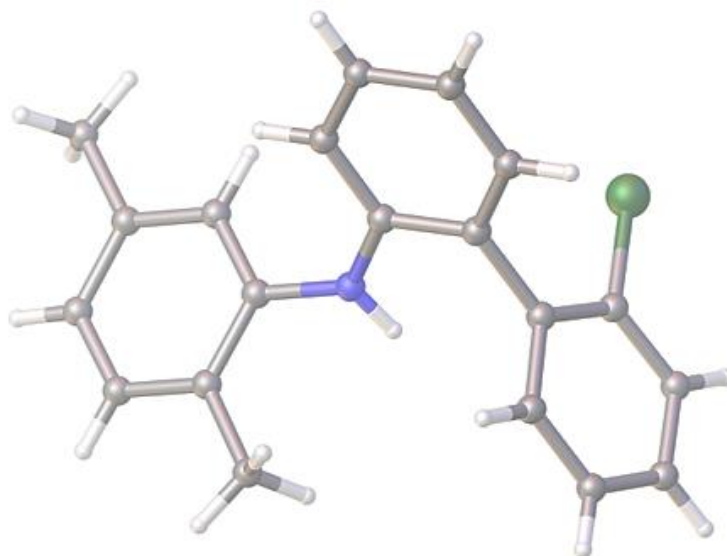

|                             |                                                                                                                         |
|-----------------------------|-------------------------------------------------------------------------------------------------------------------------|
| Identification code         | <b>8i</b>                                                                                                               |
| Empirical formula           | C <sub>20</sub> H <sub>18</sub> Cl N                                                                                    |
| Formula weight              | 307.80                                                                                                                  |
| Temperature                 | 296(2) K                                                                                                                |
| Wavelength                  | 0.71073 Å                                                                                                               |
| Crystal system, space group | Monoclinic, C2/c                                                                                                        |
| Unit cell dimensions        | a = 17.9856(9) Å    alpha = 90 deg.<br>b = 7.6368(3) Å    beta = 92.914(2) deg.<br>c = 23.5135(13) Å    gamma = 90 deg. |
| Volume                      | 3225.5(3) Å <sup>3</sup>                                                                                                |
| Z, Calculated density       | 8, 1.268 Mg/m <sup>3</sup>                                                                                              |
| Absorption coefficient      | 0.233 mm <sup>-1</sup>                                                                                                  |

|                                   |                                                            |
|-----------------------------------|------------------------------------------------------------|
| F(000)                            | 1296                                                       |
| Crystal size                      | 0.320 x 0.260 x 0.120 mm                                   |
| Theta range for data collection   | 1.734 to 24.999 deg.                                       |
| Limiting indices                  | $-20 \leq h \leq 21, -9 \leq k \leq 7, -27 \leq l \leq 27$ |
| Reflections collected / unique    | 9434 / 2841 [R(int) = 0.0230]                              |
| Completeness to theta = 24.999    | 100.0 %                                                    |
| Absorption correction             | None                                                       |
| Refinement method                 | Full-matrix least-squares on F <sup>2</sup>                |
| Data / restraints / parameters    | 2841 / 0 / 202                                             |
| Goodness-of-fit on F <sup>2</sup> | 1.049                                                      |
| Final R indices [I > 2σ(I)]       | R1 = 0.0449, wR2 = 0.1142                                  |
| R indices (all data)              | R1 = 0.0579, wR2 = 0.1235                                  |
| Extinction coefficient            | 0.0024(3)                                                  |
| Largest diff. peak and hole       | 0.435 and -0.333 e.Å <sup>-3</sup>                         |

## NMR spectra of synthesized compounds

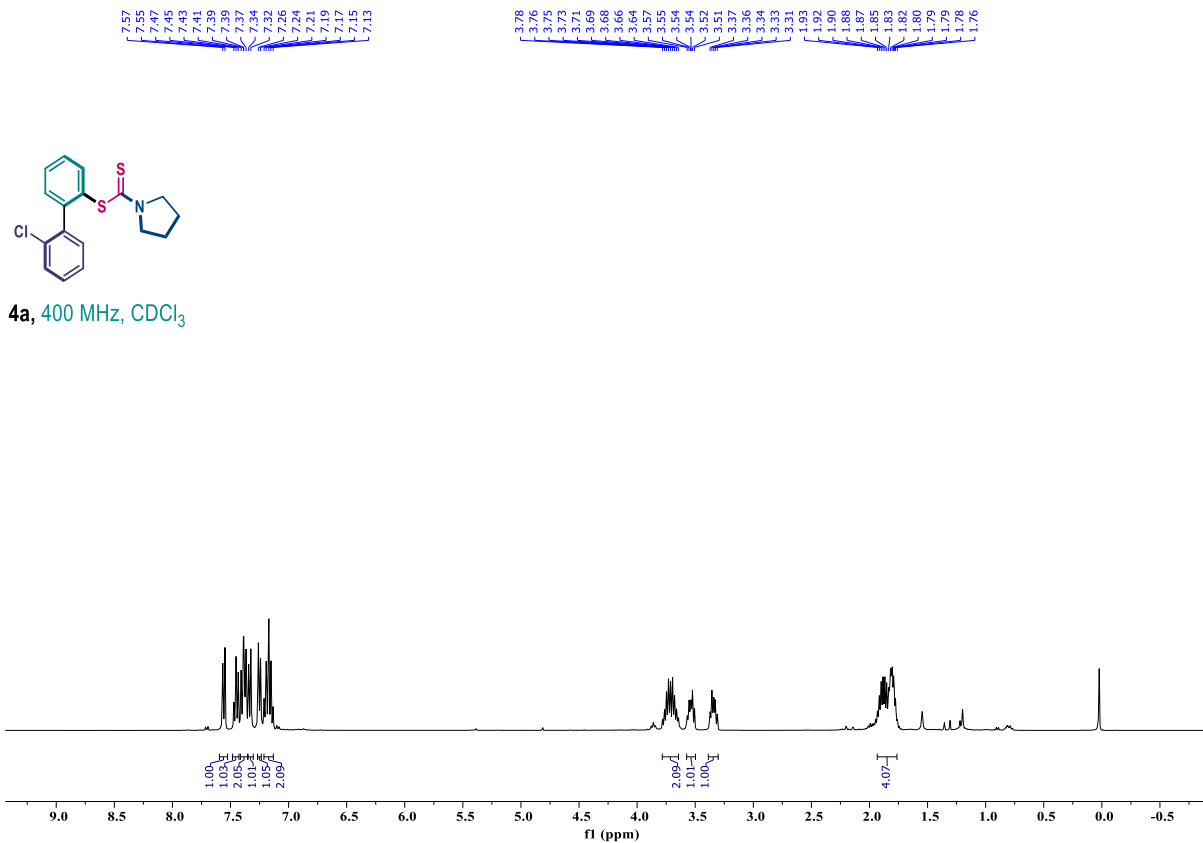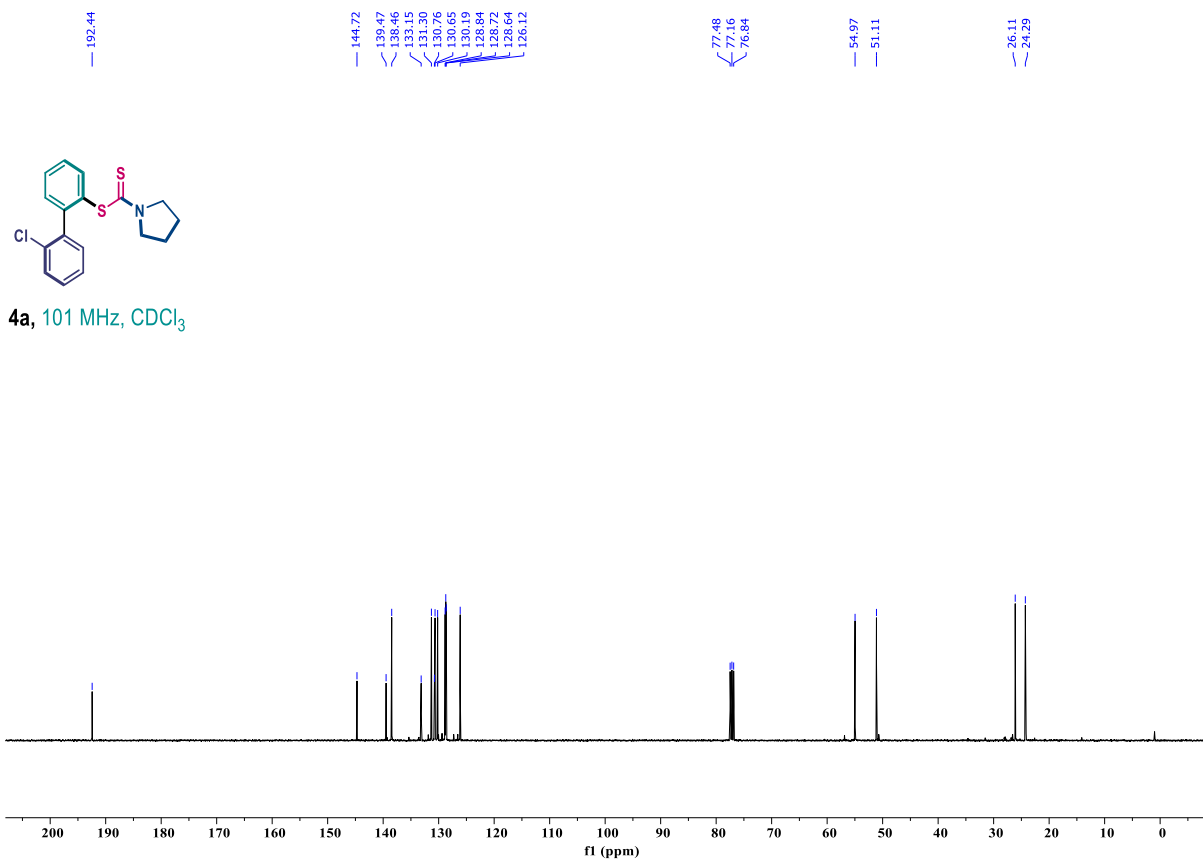



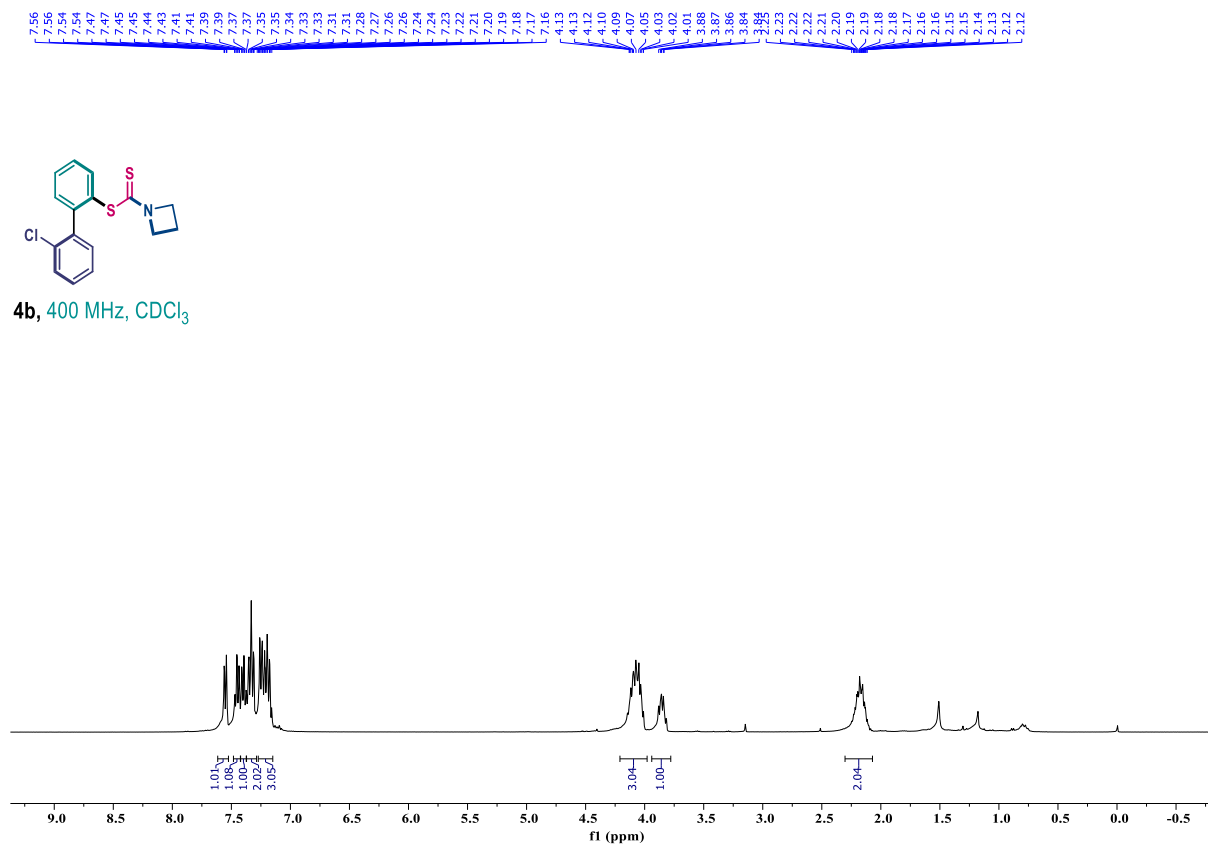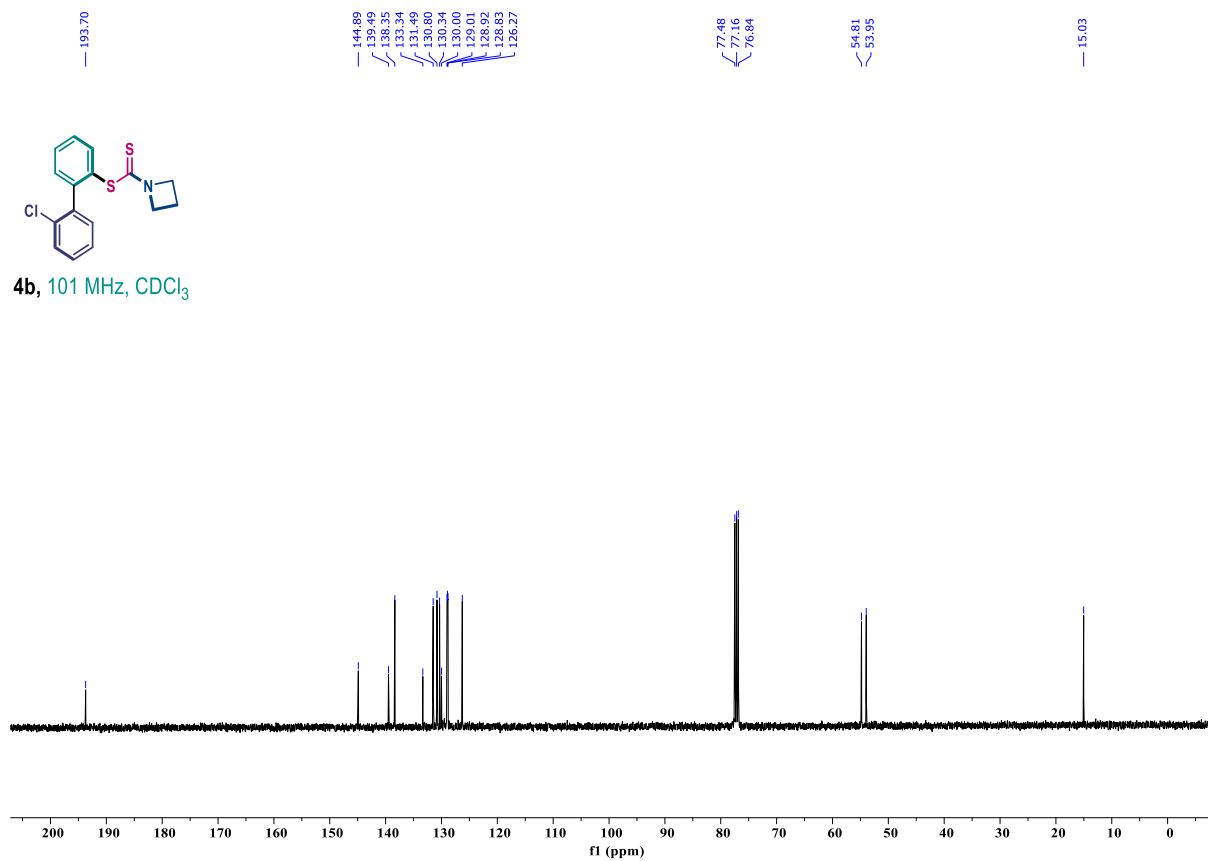

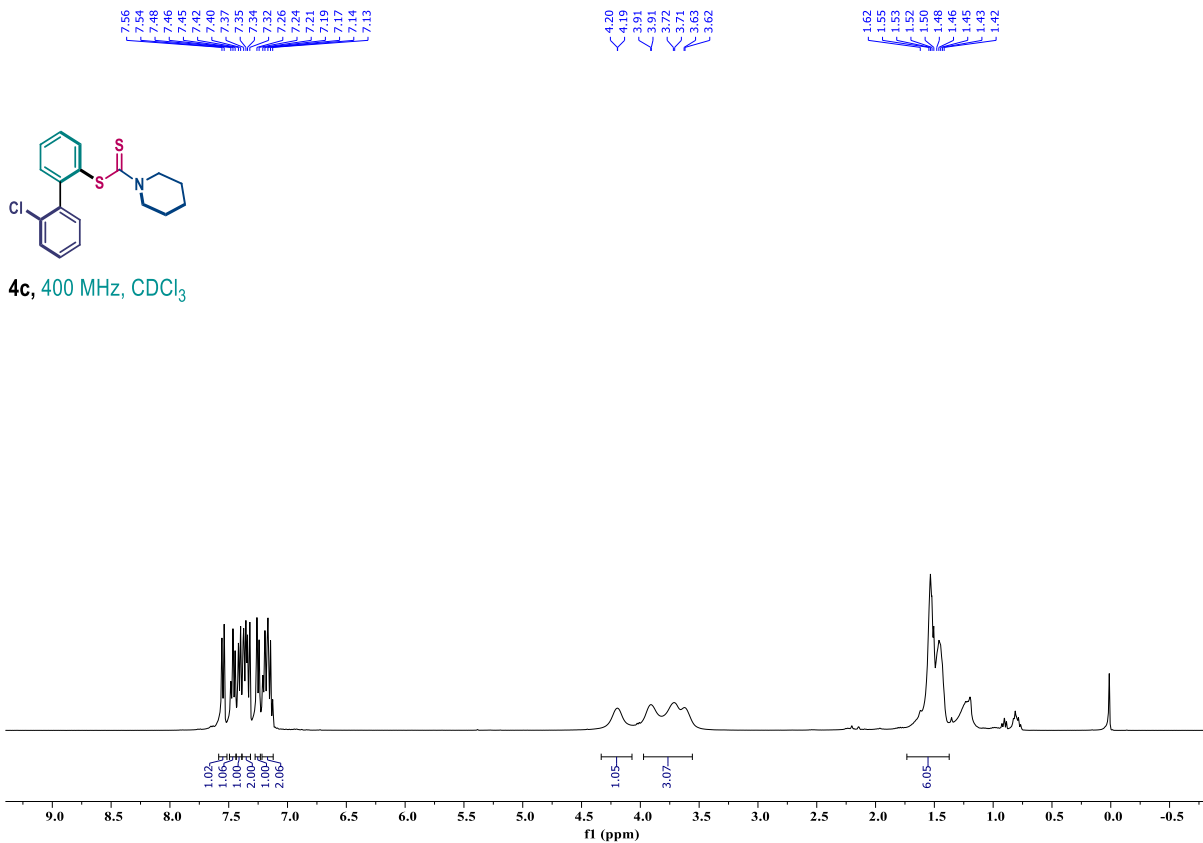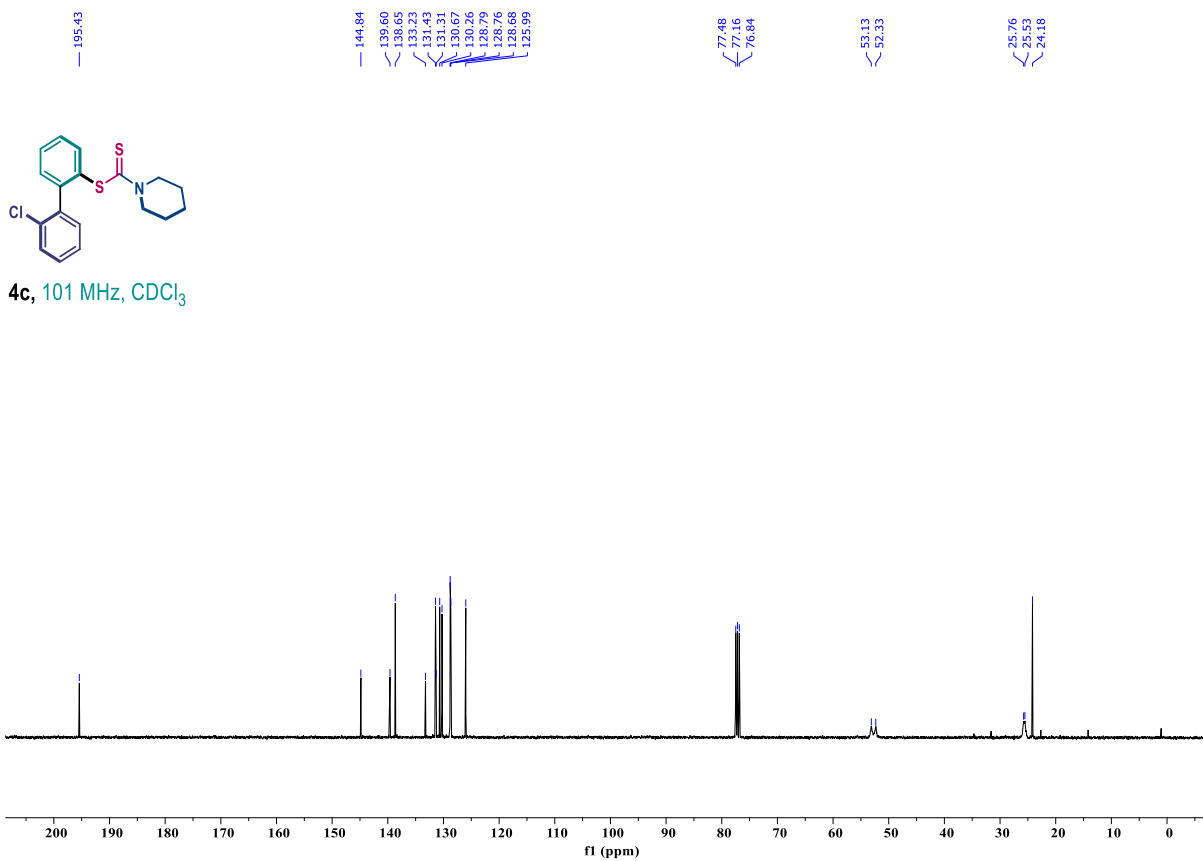

7.56  
7.54  
7.50  
7.48  
7.47  
7.44  
7.43  
7.42  
7.41  
7.40  
7.37  
7.37  
7.35  
7.35  
7.34  
7.33  
7.32  
7.28  
7.26  
7.21  
7.21  
7.19  
7.19  
7.17  
7.17  
7.16  
7.16  
7.14  
4.24  
4.22  
4.22  
4.20  
3.81  
3.80  
3.79  
3.78  
3.74  
3.73  
3.72  
3.71  
3.71  
3.54  
3.53  
3.52  
3.51  
3.51  
3.50  
3.49  
3.47  
3.47  
1.71  
1.70  
1.69  
1.68  
1.67  
1.66  
1.64  
1.64  
1.63  
1.62  
1.61  
1.59  
1.58  
1.57  
1.56  
1.55  
1.55  
1.48  
1.47  
1.46  
1.45  
1.44  
1.43  
1.42  
1.41  
1.40  
1.39  
1.38  
1.37  
1.36  
1.35  
1.33  
1.33  
1.32  
1.31  
1.30  
1.29  
1.28  
1.27  
1.26  
1.25  
1.24  
1.23  
1.22  
1.21  
1.20  
1.19

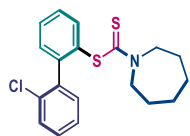

4d, 400 MHz, CDCl<sub>3</sub>

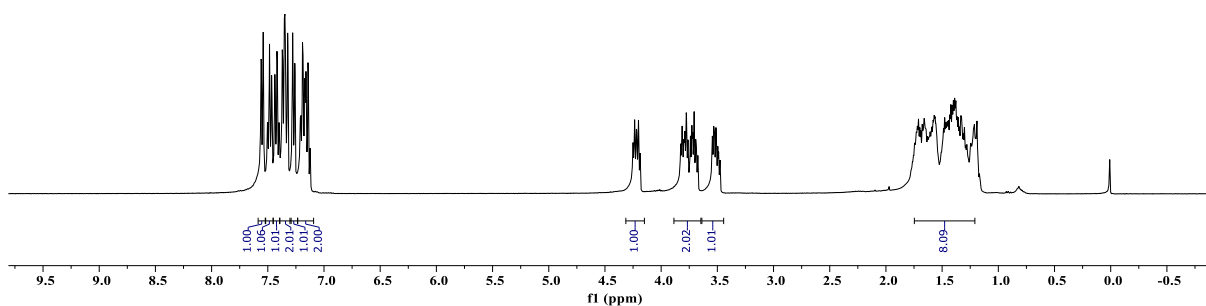

196.13

145.06  
139.71  
138.87  
132.30  
131.51  
130.74  
130.41  
128.82  
128.78  
128.75  
126.05

77.48  
77.16  
76.84

55.82  
53.41

27.14  
26.37  
26.15

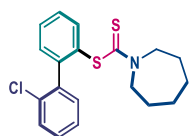

4d, 101 MHz, CDCl<sub>3</sub>

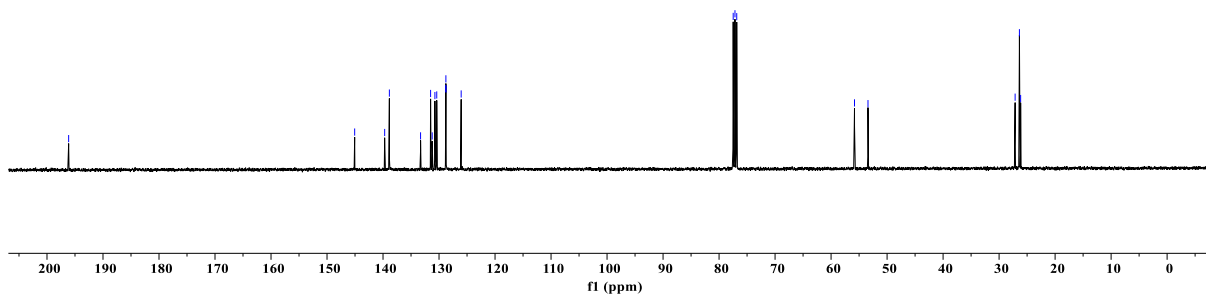

7.55  
7.54  
7.53  
7.53  
7.50  
7.49  
7.48  
7.47  
7.46  
7.44  
7.43  
7.42  
7.41  
7.39  
7.38  
7.36  
7.35  
7.34  
7.33  
7.32  
7.32  
7.28  
7.28  
7.26  
7.26  
7.20  
7.20  
7.18  
7.18  
7.16  
7.16  
7.15  
7.15  
7.13  
7.13  
4.20  
4.19  
4.18  
4.17  
4.16  
4.15  
3.81  
3.79  
3.77  
3.76  
3.67  
3.66  
3.65  
3.64  
3.64  
3.63  
3.60  
3.48  
3.47  
3.46  
3.46  
1.70  
1.69  
1.68  
1.67  
1.66  
1.64  
1.63  
1.62  
1.61  
1.60  
1.59  
1.59  
1.57  
1.56  
1.37  
1.36  
1.35  
1.34  
1.34  
1.33  
1.32  
1.32  
1.31  
1.29  
1.27  
1.26

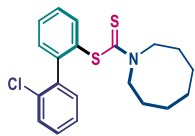

4e, 400 MHz, CDCl<sub>3</sub>

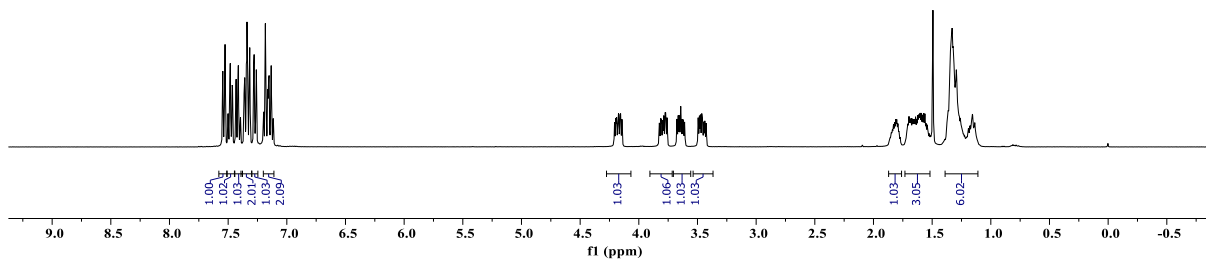

196.15

145.15  
139.74  
138.99  
133.32  
131.56  
130.78  
130.78  
130.45  
128.85  
128.79  
128.76  
126.15

77.48  
77.00  
76.84

56.63  
54.26

26.76  
26.30  
25.32  
25.22

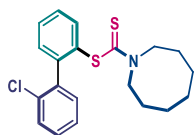

4e, 101 MHz, CDCl<sub>3</sub>

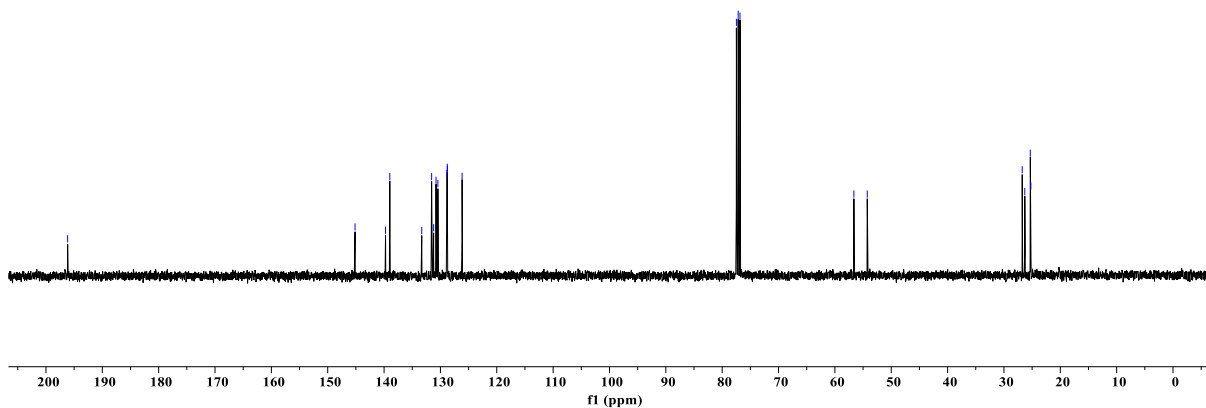

7.55  
7.53  
7.53  
7.49  
7.49  
7.47  
7.45  
7.45  
7.42  
7.40  
7.38  
7.38  
7.36  
7.34  
7.34  
7.33  
7.32  
7.32  
7.31  
7.31  
7.26  
7.26  
7.24  
7.24  
7.22  
7.22  
7.21  
7.20  
7.19  
7.18  
7.18  
7.17  
7.17  
7.15  
7.15  
7.13  
7.13

4.20  
4.20  
4.03  
4.02

3.76

2.35  
2.35  
2.29  
2.28  
2.27  
2.24  
2.22  
2.18

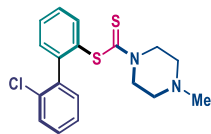

4f, 400 MHz, CDCl<sub>3</sub>

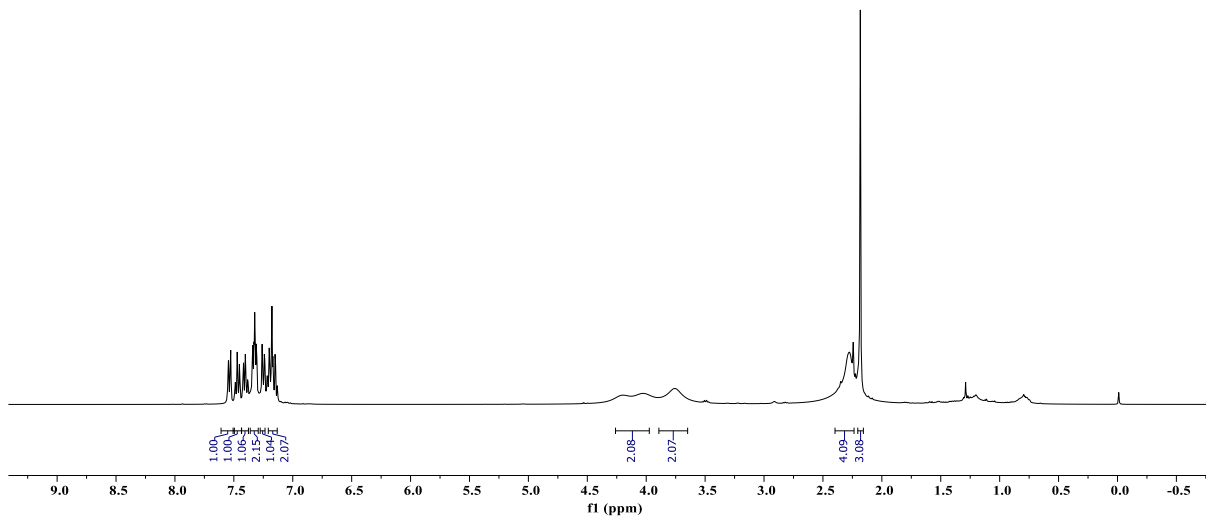

196.94

144.94  
139.61  
138.65  
133.35  
131.47  
131.07  
130.84  
129.48  
129.00  
128.90  
128.85  
126.20

77.48  
77.16  
76.84

54.37  
51.36  
50.84  
45.62

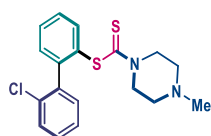

4f, 101 MHz, CDCl<sub>3</sub>

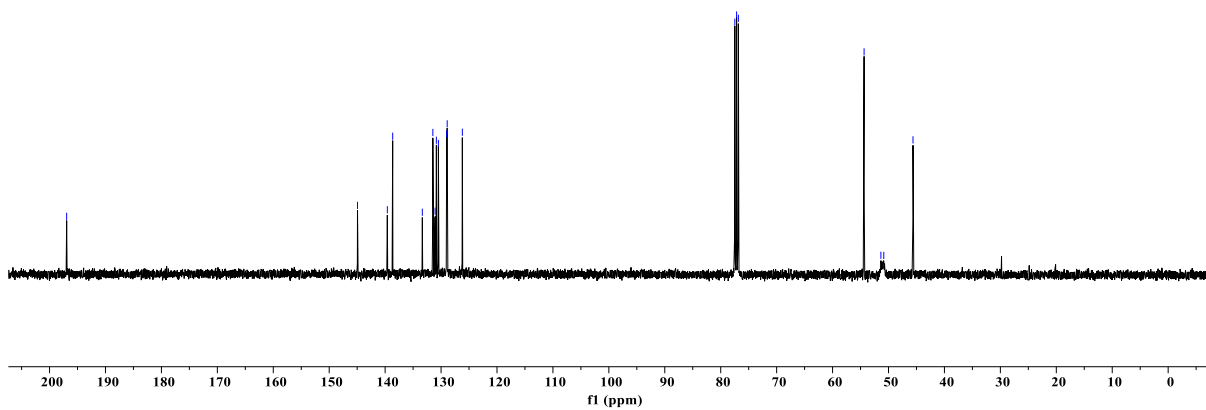

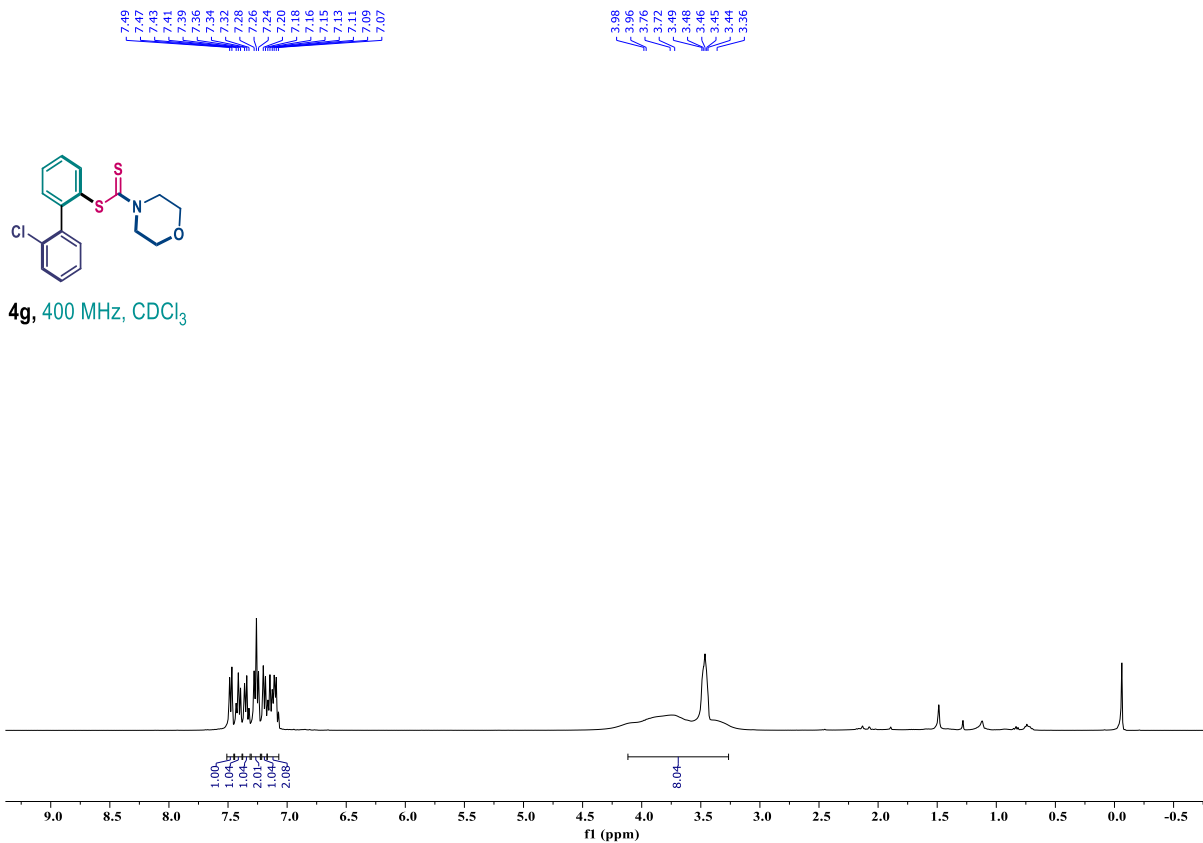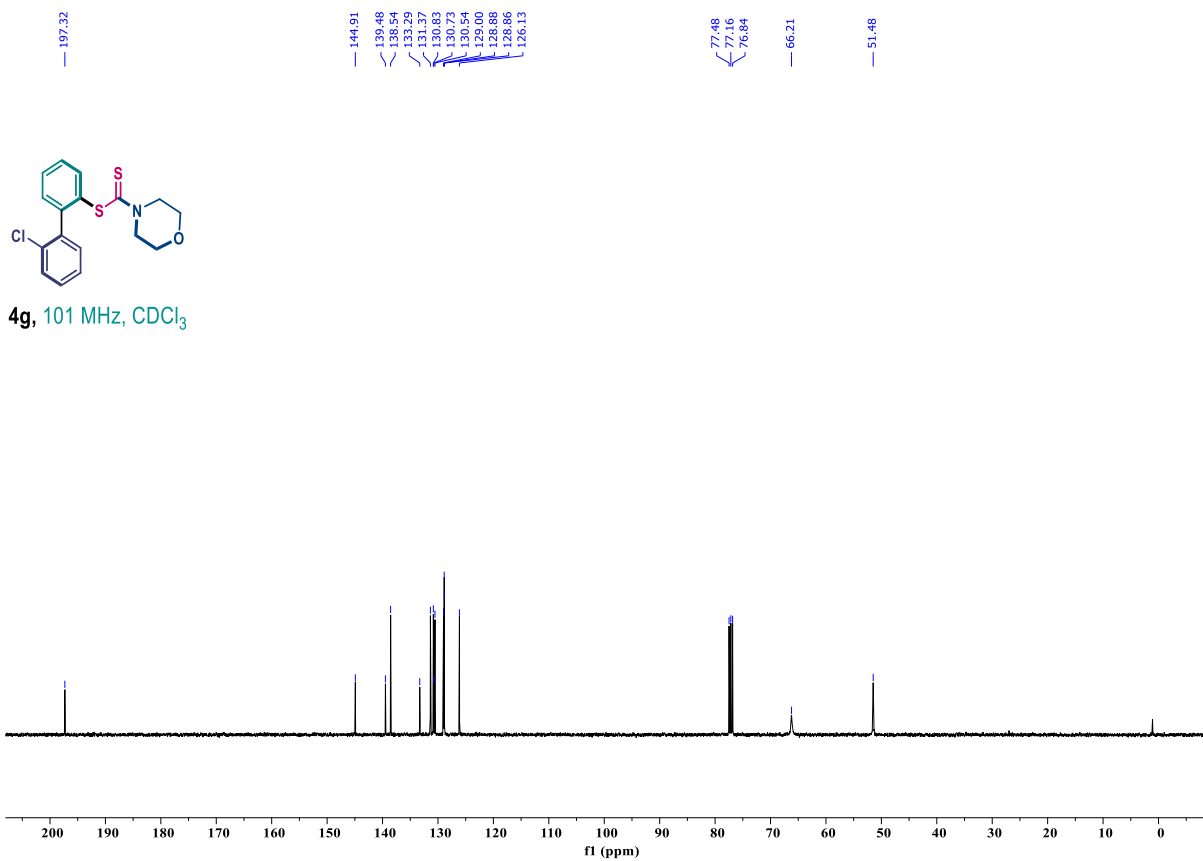

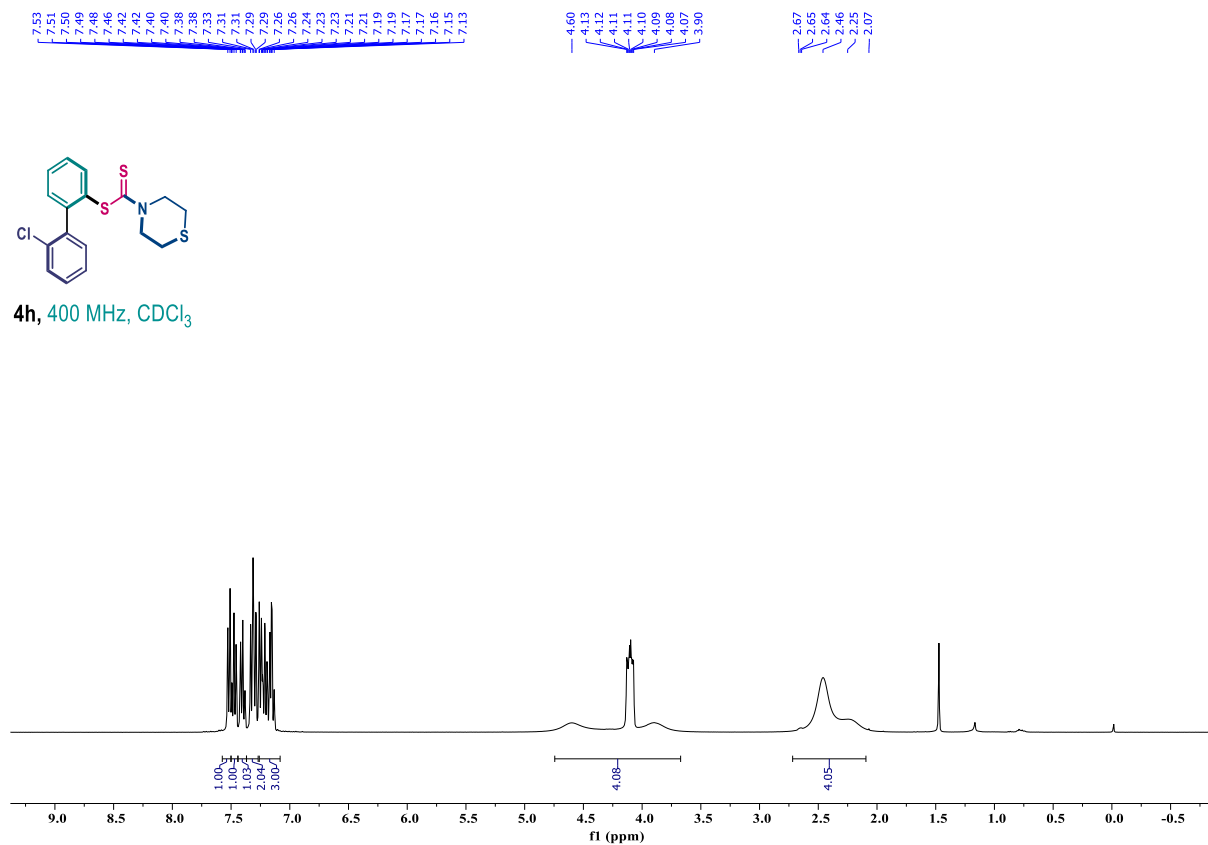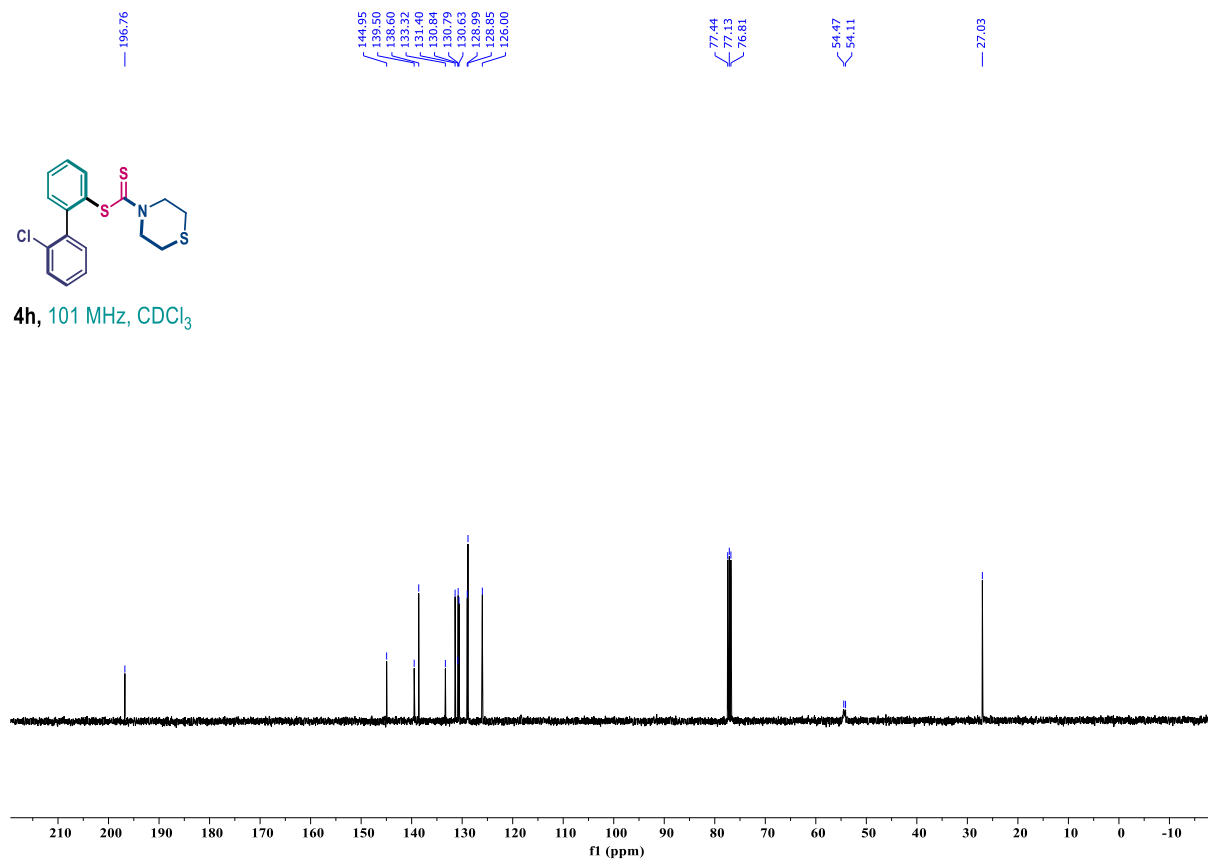

7.58  
7.57  
7.56  
7.55  
7.54  
7.53  
7.52  
7.50  
7.50  
7.47  
7.46  
7.45  
7.45  
7.45  
7.43  
7.38  
7.37  
7.36  
7.35  
7.34  
7.34  
7.31  
7.29  
7.24  
7.24  
7.23  
7.22  
7.22  
7.20  
7.20  
7.19  
7.18  
7.16  
4.48  
4.48  
4.46  
4.45  
4.44  
4.44  
4.32  
4.00  
3.98  
3.96  
3.94  
3.93  
3.92  
3.91  
3.89  
3.89  
3.88  
3.87  
3.86  
3.85  
3.85  
3.75  
3.74  
3.73  
3.72  
3.71  
3.71  
3.69  
3.67  
3.66  
3.65  
3.64  
3.63  
3.62  
3.60  
3.59  
3.57  
3.56  
3.54  
3.54  
3.19  
3.07  
3.06  
3.05  
3.02  
1.81  
1.80  
1.74  
1.73

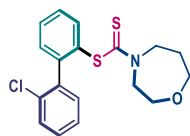

**4i**, 400 MHz, CDCl<sub>3</sub>  
(1.33:1.0 ratio of rotamer)

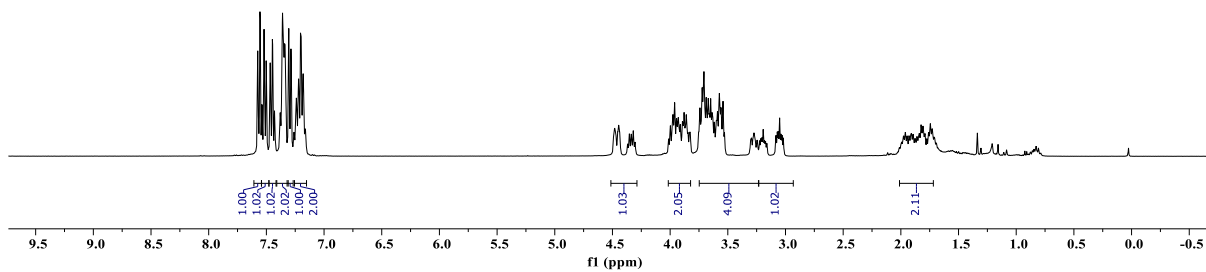

197.45  
196.85

145.12  
145.09  
139.66  
139.63  
138.79  
138.75  
137.56  
131.59  
131.48  
130.88  
130.85  
130.67  
129.04  
128.97  
128.90  
128.86  
128.81  
126.11

77.48  
77.16  
77.08  
70.08  
69.80  
69.53  
69.32

58.57  
56.35  
53.68  
51.31

27.78  
26.97

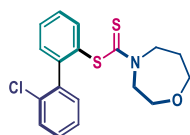

**4i**, 101 MHz, CDCl<sub>3</sub>  
(1.33:1.0 ratio of rotamer)

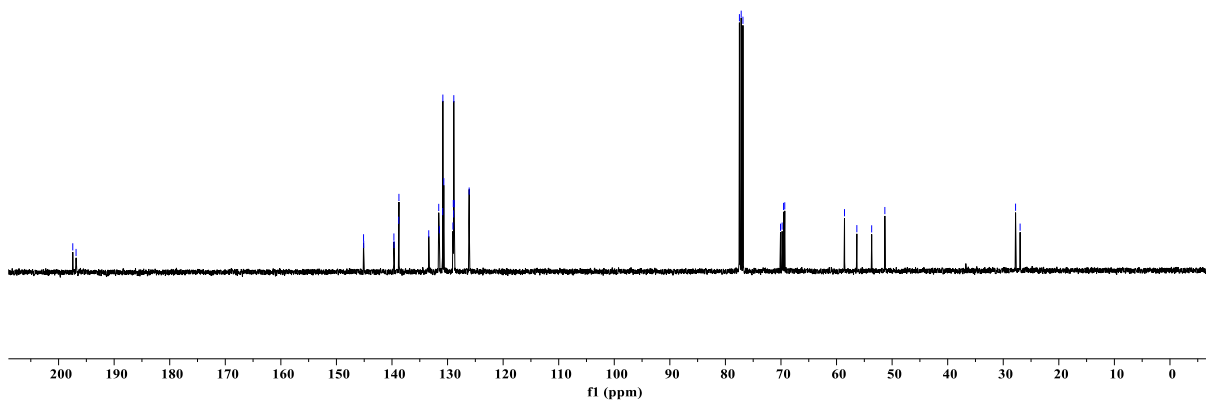



7.61  
7.59  
7.53  
7.51  
7.49  
7.46  
7.44  
7.43  
7.37  
7.36  
7.35  
7.29  
7.26  
7.24  
7.21  
7.19  
7.18  
7.17  
7.16  
7.14  
7.13  
7.11  
7.09  
7.01

5.25  
5.15  
4.89  
4.80  
4.76

4.26

3.90

2.97  
2.95  
2.93  
2.89  
2.85  
2.84  
2.83  
2.81  
2.73

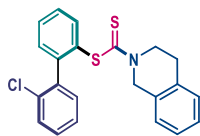

**4j**, 400 MHz, CDCl<sub>3</sub>  
(1.5:1.0 ratio of rotamer)

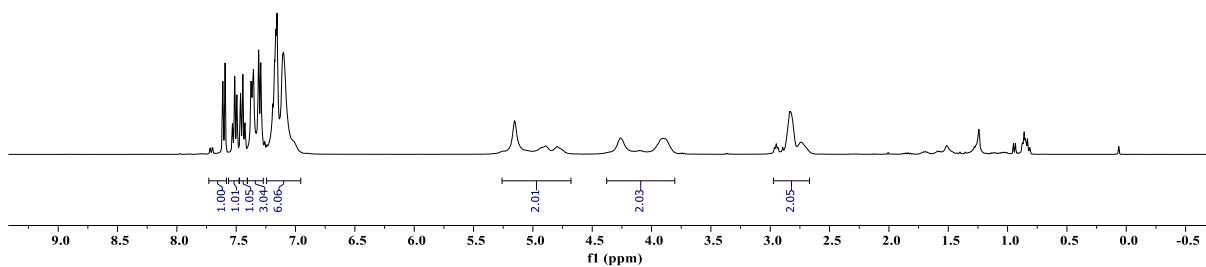

196.48

144.91  
138.49  
138.31  
138.31  
133.76  
133.20  
131.98  
131.31  
130.84  
130.39  
130.21  
129.86  
129.56  
129.03  
128.94  
128.82  
127.86  
127.43  
127.18  
126.82  
126.64  
126.14

77.48  
77.16  
76.84

53.87  
52.24  
49.96  
48.68

31.64  
29.07

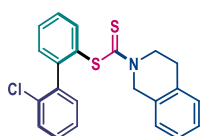

**4j**, 101 MHz, CDCl<sub>3</sub>  
(1.5:1.0 ratio of rotamer)

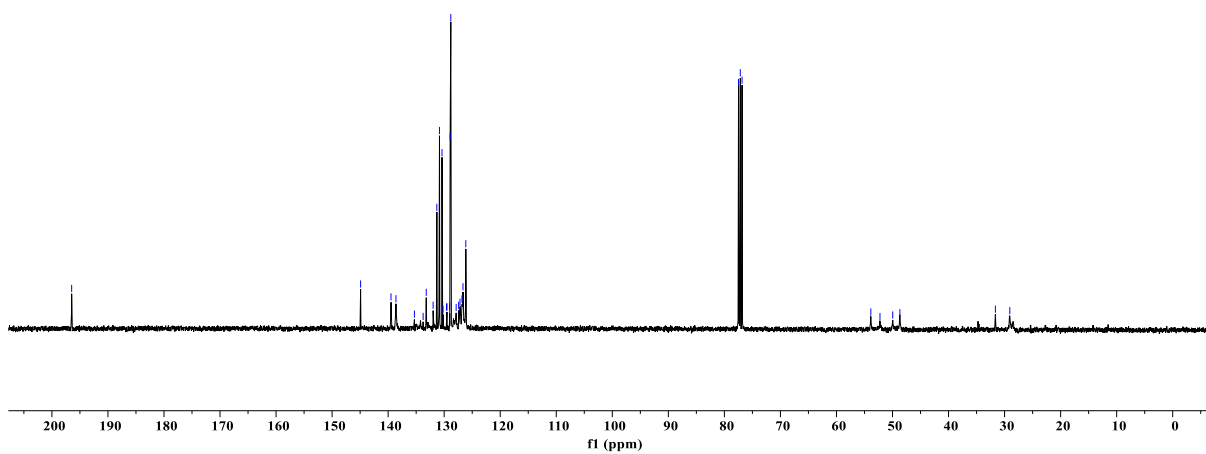

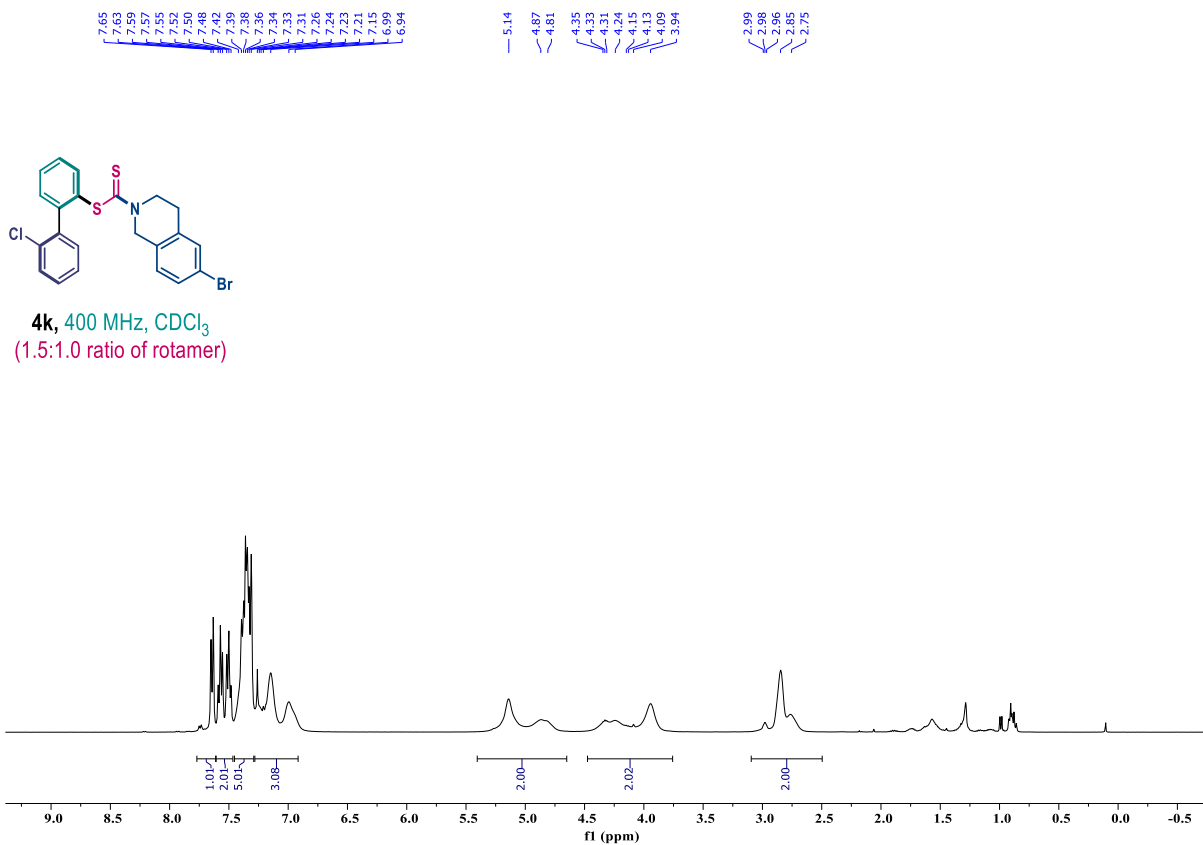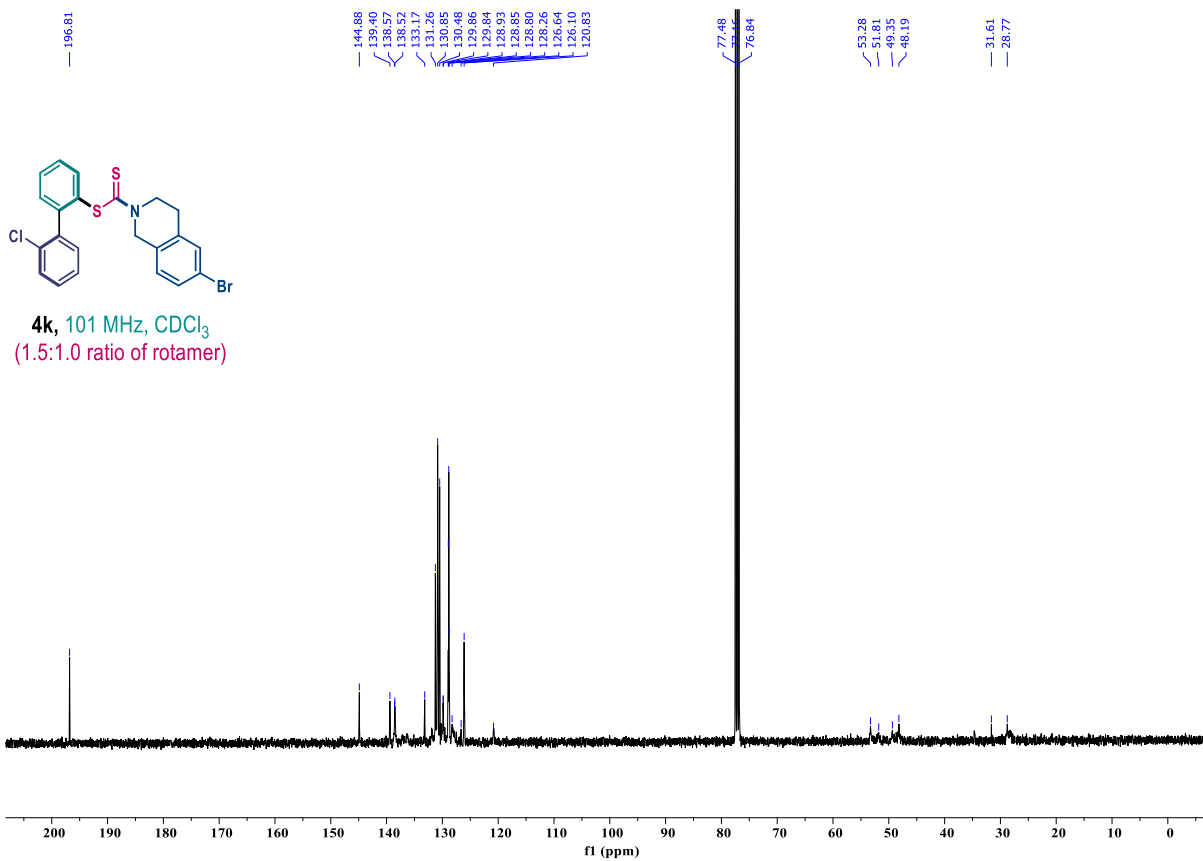

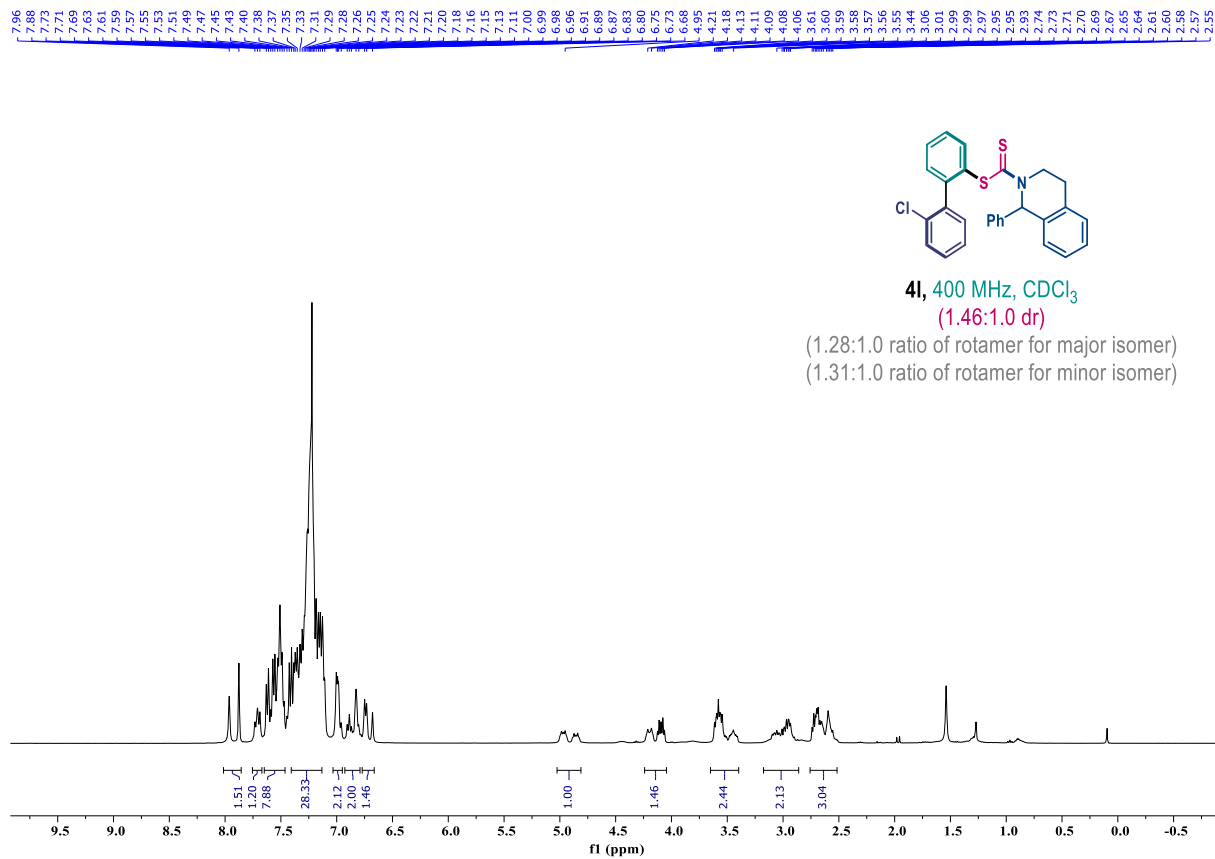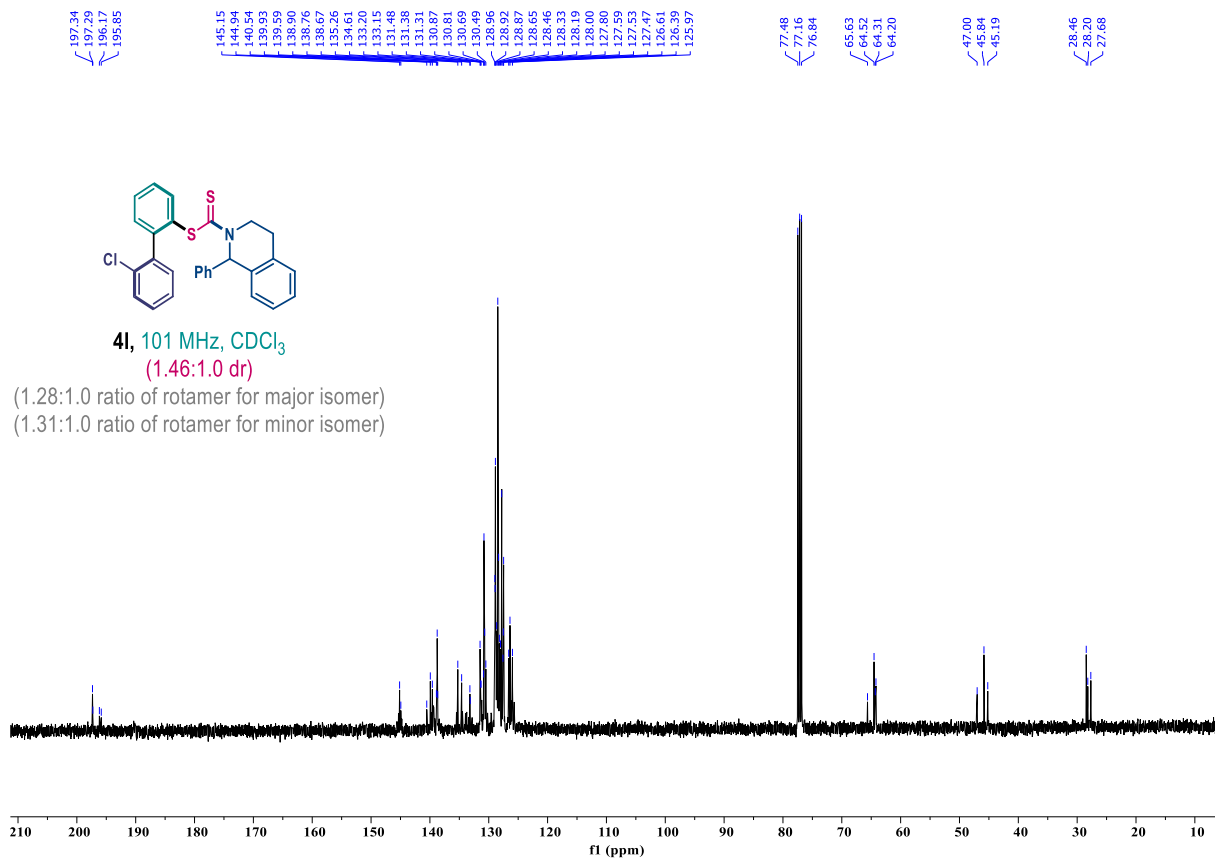

7.58  
7.57  
7.56  
7.55  
7.54  
7.53  
7.52  
7.49  
7.46  
7.45  
7.44  
7.44  
7.43  
7.42  
7.40  
7.39  
7.38  
7.37  
7.36  
7.36  
7.35  
7.34  
7.33  
7.32  
7.31  
7.30  
7.29  
7.28  
7.28  
7.26  
7.26  
7.24  
7.23  
7.22  
7.21  
7.20  
7.19  
7.17  
7.17  
7.16  
7.15  
7.13  
7.13  
3.67  
3.63  
3.61  
3.59  
3.58  
3.56  
3.40  
2.09  
2.08  
2.07  
2.06  
2.05  
2.04  
2.02  
2.00  
1.98  
1.97  
1.96  
1.95  
1.95  
1.93  
1.92  
1.91  
1.89

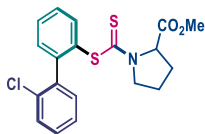

**4m**, 400 MHz, CDCl<sub>3</sub>

(3:1 dr)

(1.42:1.0 ratio of rotamer for major isomer)

(1.0:1.0 ratio of rotamer for minor isomer)

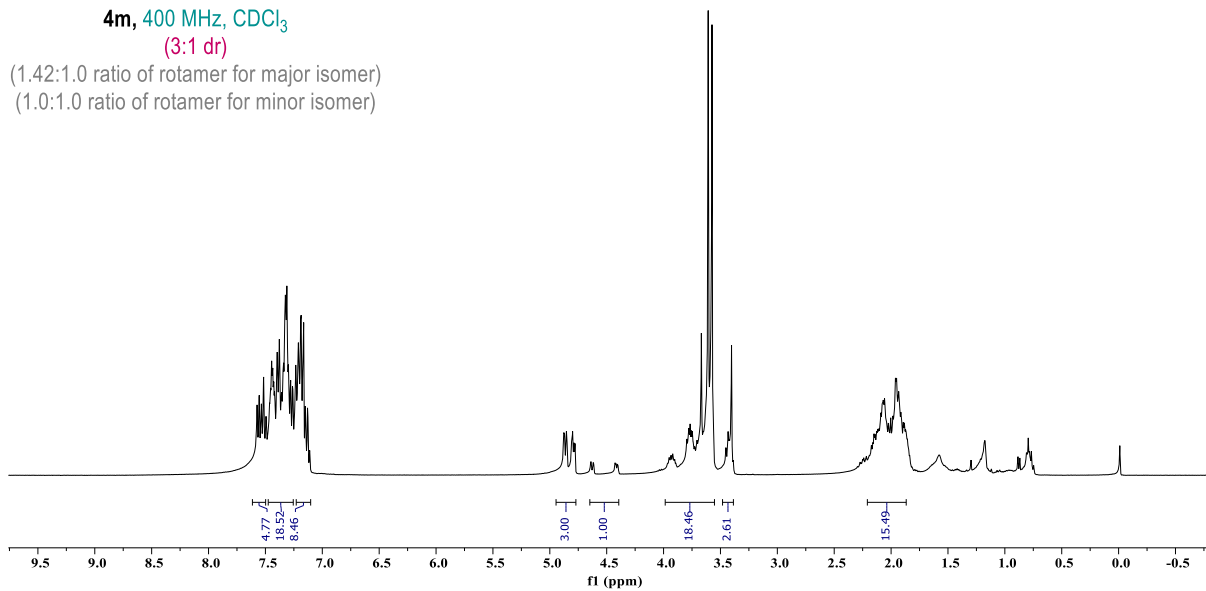

195.13  
195.10  
194.38  
171.06  
170.89  
170.78  
170.46  
144.78  
144.74  
139.56  
139.29  
138.79  
138.64  
138.50  
138.43  
133.35  
133.08  
133.02  
132.86  
131.58  
131.55  
130.99  
130.74  
130.69  
130.56  
130.42  
130.34  
128.99  
128.95  
128.88  
128.76  
128.71  
126.36  
126.20  
126.18  
126.12  
77.48  
77.16  
66.84  
66.38  
66.24  
63.32  
62.81  
55.42  
55.23  
52.85  
52.58  
52.11  
51.79  
51.46  
51.36  
31.75  
31.49  
29.32  
29.27  
24.75  
22.56  
22.50

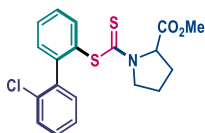

**4m**, 101 MHz, CDCl<sub>3</sub>

(3:1 dr)

(1.42:1.0 ratio of rotamer for major isomer)

(1.0:1.0 ratio of rotamer for minor isomer)

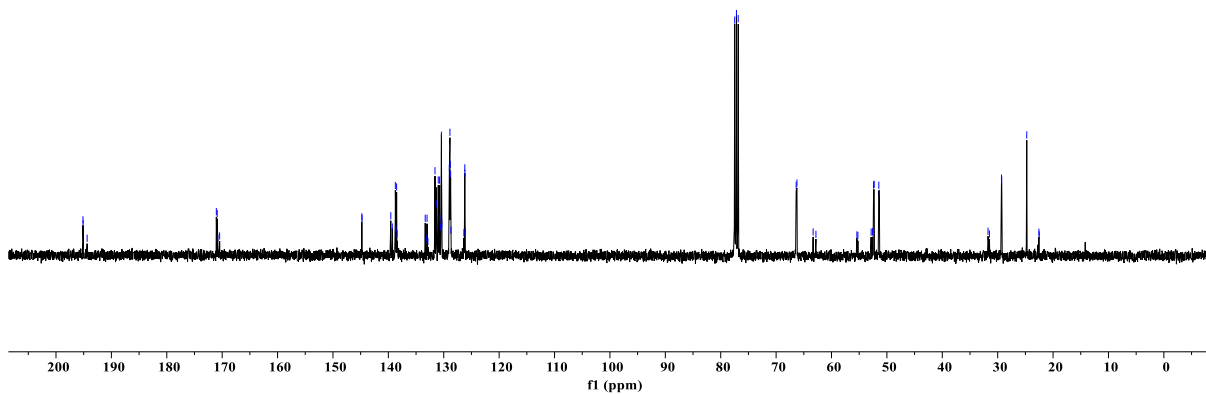

7.65  
7.64  
7.63  
7.62  
7.61  
7.60  
7.59  
7.58  
7.57  
7.56  
7.55  
7.54  
7.53  
7.52  
7.51  
7.50  
7.49  
7.48  
7.47  
7.46  
7.45  
7.44  
7.43  
7.42  
7.41  
7.40  
7.39  
7.38  
7.37  
7.36  
7.35  
7.34  
7.33  
7.32  
7.31  
7.30  
7.29  
7.28  
7.27  
7.26  
7.25  
7.24  
7.23  
7.22  
7.21  
7.20  
7.19  
7.18  
7.17  
7.16  
7.15  
7.14  
7.13  
7.12  
7.11  
7.10  
7.09  
7.08  
7.07  
7.06  
7.05  
7.04  
7.03  
7.02  
7.01  
7.00  
6.99  
6.98  
6.97  
6.96  
6.95  
6.94  
6.93  
6.92  
6.91  
6.90  
6.89  
6.88  
6.87  
6.86  
6.85  
6.84  
6.83  
6.82  
6.81  
6.80  
6.79  
6.78  
6.77  
6.76  
6.75  
6.74  
6.73  
6.72  
6.71  
6.70  
6.69  
6.68  
6.67  
6.66  
6.65  
6.64  
6.63  
6.62  
6.61  
6.60  
6.59  
6.58  
6.57  
6.56  
6.55  
6.54  
6.53  
6.52  
6.51  
6.50  
6.49  
6.48  
6.47  
6.46  
6.45  
6.44  
6.43  
6.42  
6.41  
6.40  
6.39  
6.38  
6.37  
6.36  
6.35  
6.34  
6.33  
6.32  
6.31  
6.30  
6.29  
6.28  
6.27  
6.26  
6.25  
6.24  
6.23  
6.22  
6.21  
6.20  
6.19  
6.18  
6.17  
6.16  
6.15  
6.14  
6.13  
6.12  
6.11  
6.10  
6.09  
6.08  
6.07  
6.06  
6.05  
6.04  
6.03  
6.02  
6.01  
6.00  
5.99  
5.98  
5.97  
5.96  
5.95  
5.94  
5.93  
5.92  
5.91  
5.90  
5.89  
5.88  
5.87  
5.86  
5.85  
5.84  
5.83  
5.82  
5.81  
5.80  
5.79  
5.78  
5.77  
5.76  
5.75  
5.74  
5.73  
5.72  
5.71  
5.70  
5.69  
5.68  
5.67  
5.66  
5.65  
5.64  
5.63  
5.62  
5.61  
5.60  
5.59  
5.58  
5.57  
5.56  
5.55  
5.54  
5.53  
5.52  
5.51  
5.50  
5.49  
5.48  
5.47  
5.46  
5.45  
5.44  
5.43  
5.42  
5.41  
5.40  
5.39  
5.38  
5.37  
5.36  
5.35  
5.34  
5.33  
5.32  
5.31  
5.30  
5.29  
5.28  
5.27  
5.26  
5.25  
5.24  
5.23  
5.22  
5.21  
5.20  
5.19  
5.18  
5.17  
5.16  
5.15  
5.14  
5.13  
5.12  
5.11  
5.10  
5.09  
5.08  
5.07  
5.06  
5.05  
5.04  
5.03  
5.02  
5.01  
5.00  
4.99  
4.98  
4.97  
4.96  
4.95  
4.94  
4.93  
4.92  
4.91  
4.90  
4.89  
4.88  
4.87  
4.86  
4.85  
4.84  
4.83  
4.82  
4.81  
4.80  
4.79  
4.78  
4.77  
4.76  
4.75  
4.74  
4.73  
4.72  
4.71  
4.70  
4.69  
4.68  
4.67  
4.66  
4.65  
4.64  
4.63  
4.62  
4.61  
4.60  
4.59  
4.58  
4.57  
4.56  
4.55  
4.54  
4.53  
4.52  
4.51  
4.50  
4.49  
4.48  
4.47  
4.46  
4.45  
4.44  
4.43  
4.42  
4.41  
4.40  
4.39  
4.38  
4.37  
4.36  
4.35  
4.34  
4.33  
4.32  
4.31  
4.30  
4.29  
4.28  
4.27  
4.26  
4.25  
4.24  
4.23  
4.22  
4.21  
4.20  
4.19  
4.18  
4.17  
4.16  
4.15  
4.14  
4.13  
4.12  
4.11  
4.10  
4.09  
4.08  
4.07  
4.06  
4.05  
4.04  
4.03  
4.02  
4.01  
4.00  
3.99  
3.98  
3.97  
3.96  
3.95  
3.94  
3.93  
3.92  
3.91  
3.90  
3.89  
3.88  
3.87  
3.86  
3.85  
3.84  
3.83  
3.82  
3.81  
3.80  
3.79  
3.78  
3.77  
3.76  
3.75  
3.74  
3.73  
3.72  
3.71  
3.70  
3.69  
3.68  
3.67  
3.66  
3.65  
3.64  
3.63  
3.62  
3.61  
3.60  
3.59  
3.58  
3.57  
3.56  
3.55  
3.54  
3.53  
3.52  
3.51  
3.50  
3.49  
3.48  
3.47  
3.46  
3.45  
3.44  
3.43  
3.42  
3.41  
3.40  
3.39  
3.38  
3.37  
3.36  
3.35  
3.34  
3.33  
3.32  
3.31  
3.30  
3.29  
3.28  
3.27  
3.26  
3.25  
3.24  
3.23  
3.22  
3.21  
3.20  
3.19  
3.18  
3.17  
3.16  
3.15  
3.14  
3.13  
3.12  
3.11  
3.10  
3.09  
3.08  
3.07  
3.06  
3.05  
3.04  
3.03  
3.02  
3.01  
3.00  
2.99  
2.98  
2.97  
2.96  
2.95  
2.94  
2.93  
2.92  
2.91  
2.90  
2.89  
2.88  
2.87  
2.86  
2.85  
2.84  
2.83  
2.82  
2.81  
2.80  
2.79  
2.78  
2.77  
2.76  
2.75  
2.74  
2.73  
2.72  
2.71  
2.70  
2.69  
2.68  
2.67  
2.66  
2.65  
2.64  
2.63  
2.62  
2.61  
2.60  
2.59  
2.58  
2.57  
2.56  
2.55  
2.54  
2.53  
2.52  
2.51  
2.50  
2.49  
2.48  
2.47  
2.46  
2.45  
2.44  
2.43  
2.42  
2.41  
2.40  
2.39  
2.38  
2.37  
2.36  
2.35  
2.34  
2.33  
2.32  
2.31  
2.30  
2.29  
2.28  
2.27  
2.26  
2.25  
2.24  
2.23  
2.22  
2.21  
2.20  
2.19  
2.18  
2.17  
2.16  
2.15  
2.14  
2.13  
2.12  
2.11  
2.10  
2.09  
2.08  
2.07  
2.06  
2.05  
2.04  
2.03  
2.02  
2.01  
2.00  
1.99  
1.98  
1.97  
1.96  
1.95  
1.94  
1.93  
1.92  
1.91  
1.90  
1.89  
1.88  
1.87  
1.86  
1.85  
1.84  
1.83  
1.82  
1.81  
1.80  
1.79  
1.78  
1.77  
1.76  
1.75  
1.74  
1.73  
1.72  
1.71  
1.70  
1.69  
1.68  
1.67  
1.66  
1.65  
1.64  
1.63  
1.62  
1.61  
1.60  
1.59  
1.58  
1.57  
1.56  
1.55  
1.54  
1.53  
1.52  
1.51  
1.50  
1.49  
1.48  
1.47  
1.46  
1.45  
1.44  
1.43  
1.42  
1.41  
1.40  
1.39  
1.38  
1.37  
1.36  
1.35  
1.34  
1.33  
1.32  
1.31  
1.30  
1.29  
1.28  
1.27  
1.26  
1.25  
1.24  
1.23  
1.22  
1.21  
1.20  
1.19  
1.18  
1.17  
1.16  
1.15  
1.14  
1.13  
1.12  
1.11  
1.10  
1.09  
1.08  
1.07  
1.06  
1.05

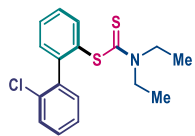

4n, 400 MHz, CDCl<sub>3</sub>

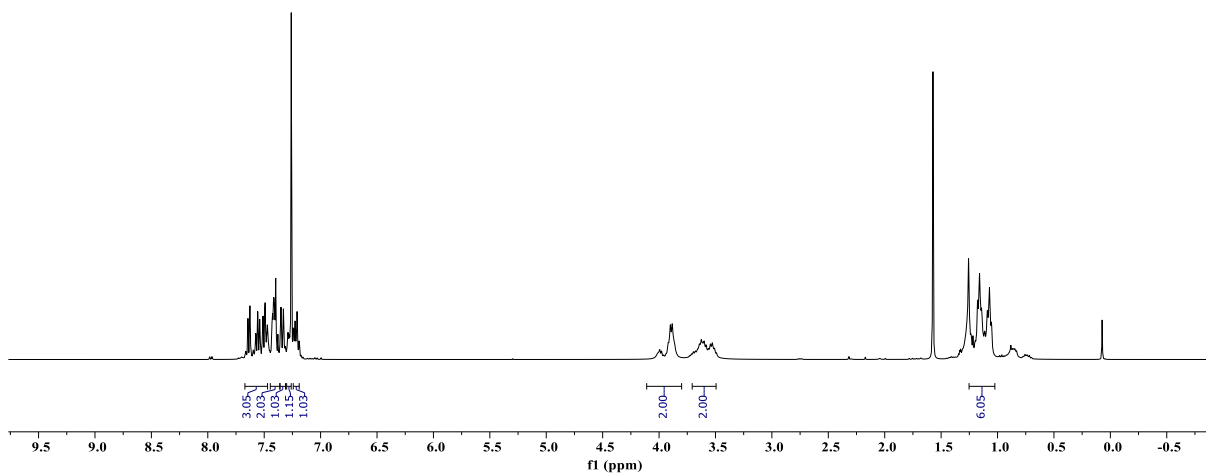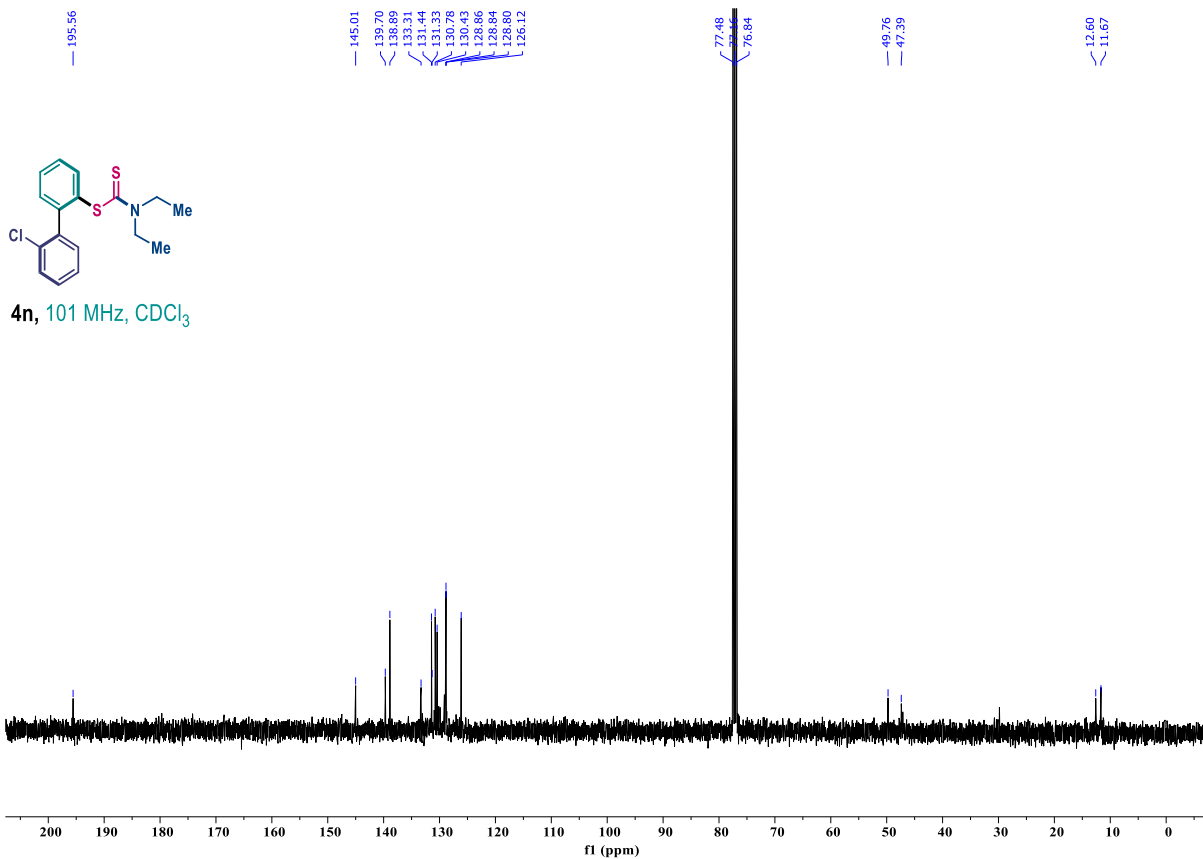

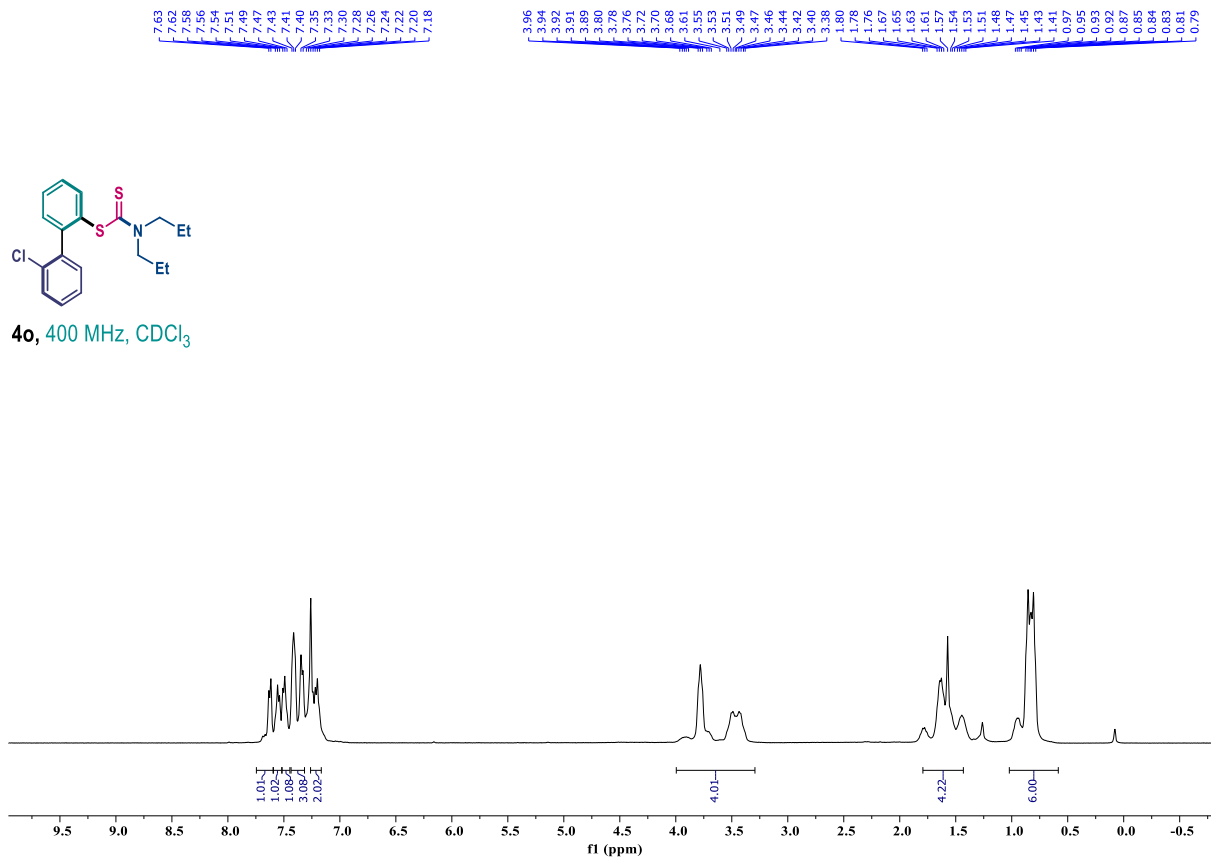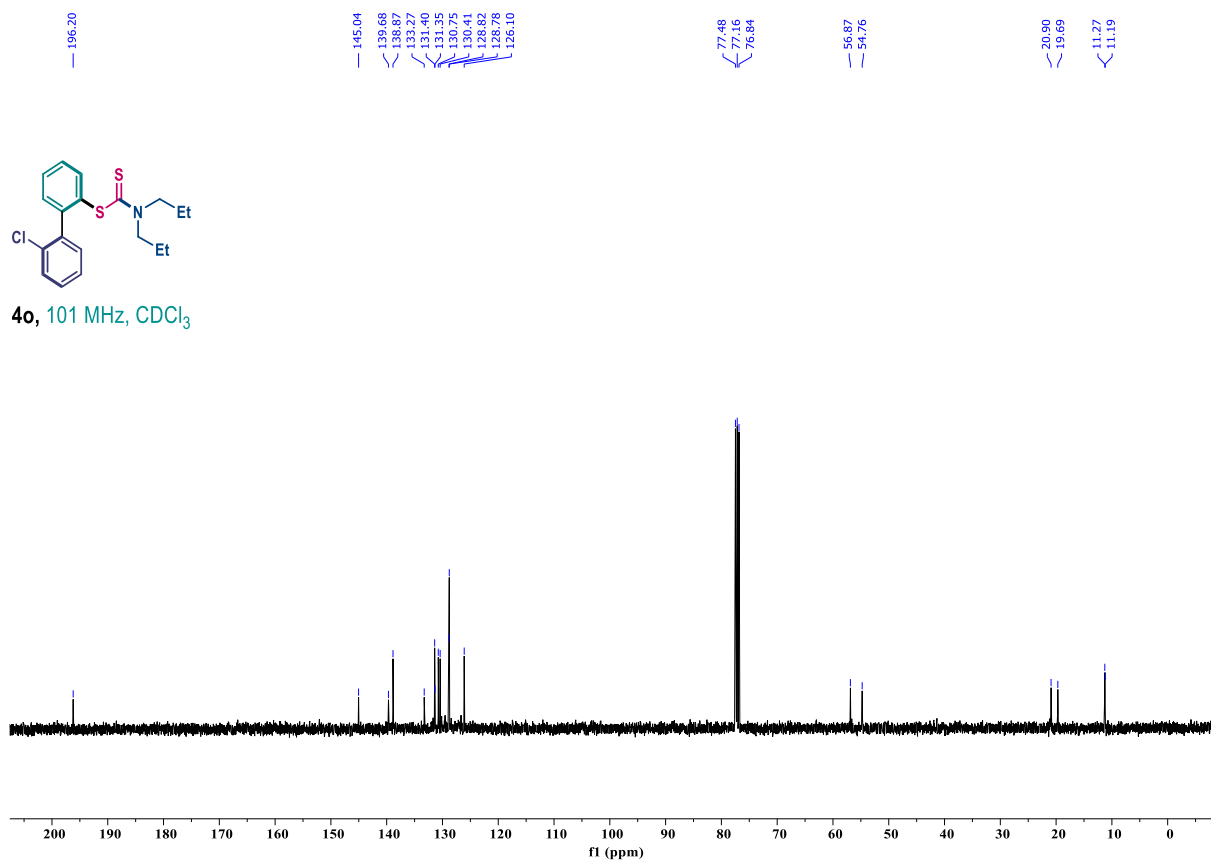

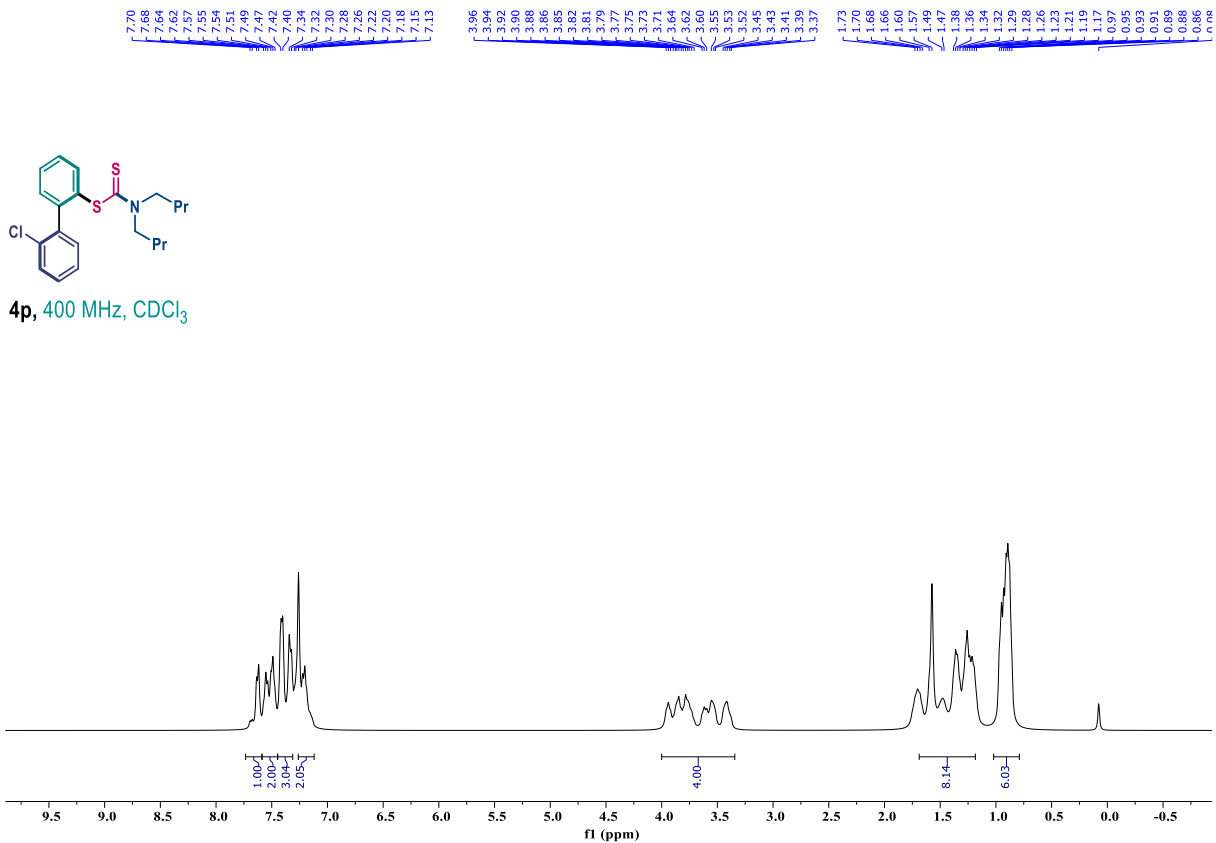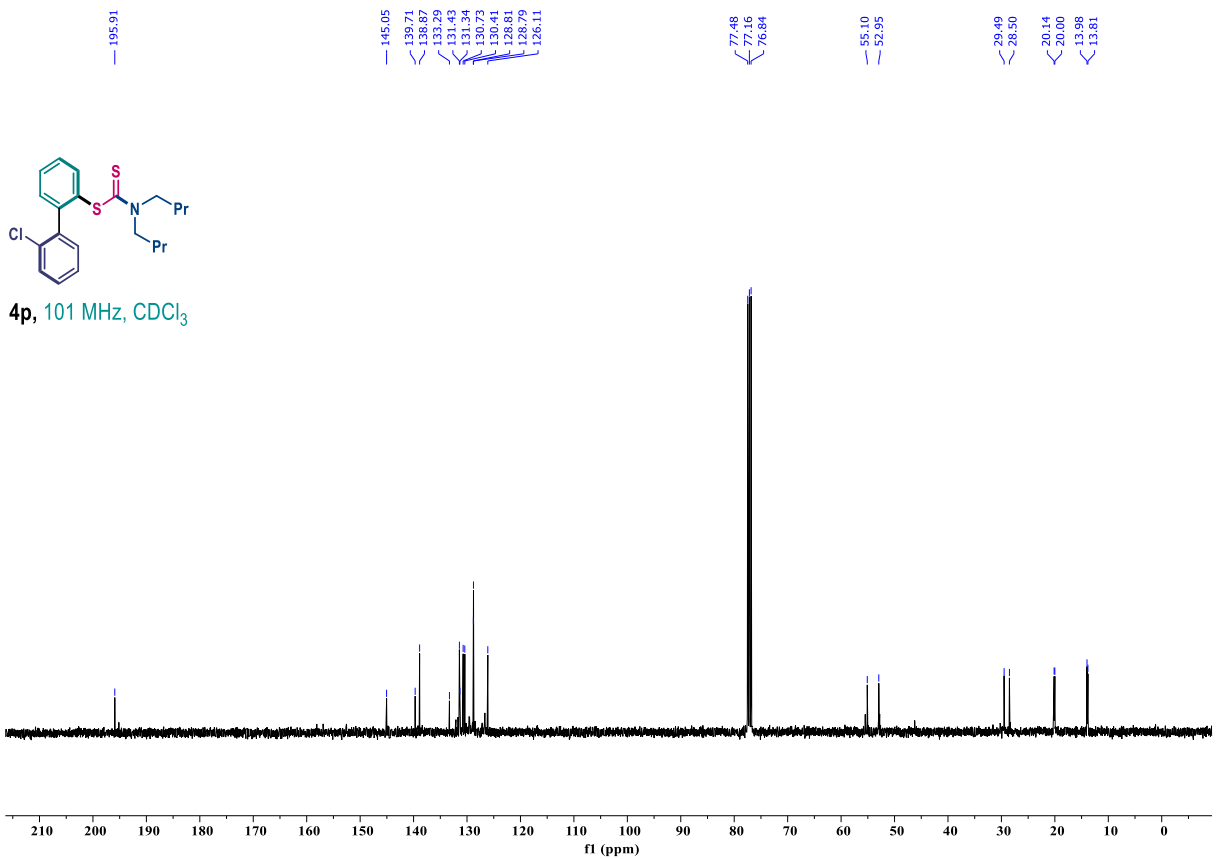

7.57  
7.55  
7.50  
7.48  
7.46  
7.44  
7.41  
7.40  
7.38  
7.37  
7.34  
7.32  
7.28  
7.26  
7.24  
7.22  
7.20  
7.19  
7.18  
7.17  
7.16  
7.14  
6.99  
6.88  
6.83  
5.44  
5.40  
4.97  
4.95  
4.89  
4.86  
4.56  
4.52  
3.20  
3.02

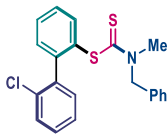

4q, 400 MHz, CDCl<sub>3</sub>  
(1.1:1.0 ratio of rotamer)

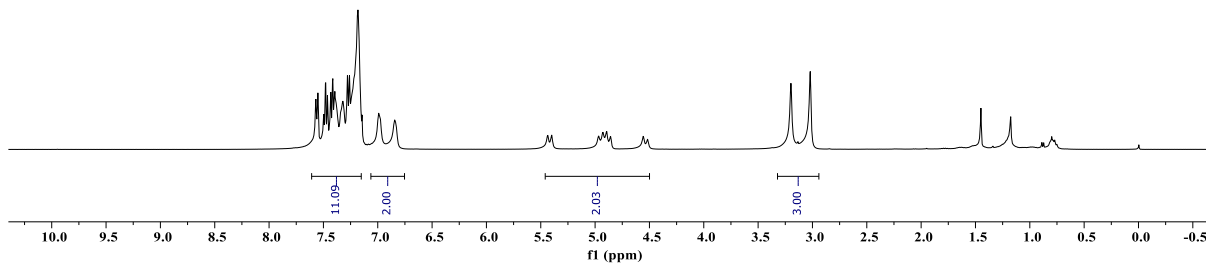

198.90  
197.49

145.18  
145.11  
139.63  
139.63  
138.63  
138.55  
138.55  
134.74  
133.37  
131.48  
131.40  
130.88  
130.61  
128.75  
128.75  
127.99  
127.74  
127.55  
127.27  
126.21  
126.08

77.48  
77.16  
76.84

59.59  
58.19

43.18  
39.38

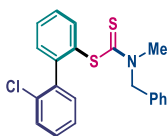

4q, 101 MHz, CDCl<sub>3</sub>  
(1.1:1.0 ratio of rotamer)

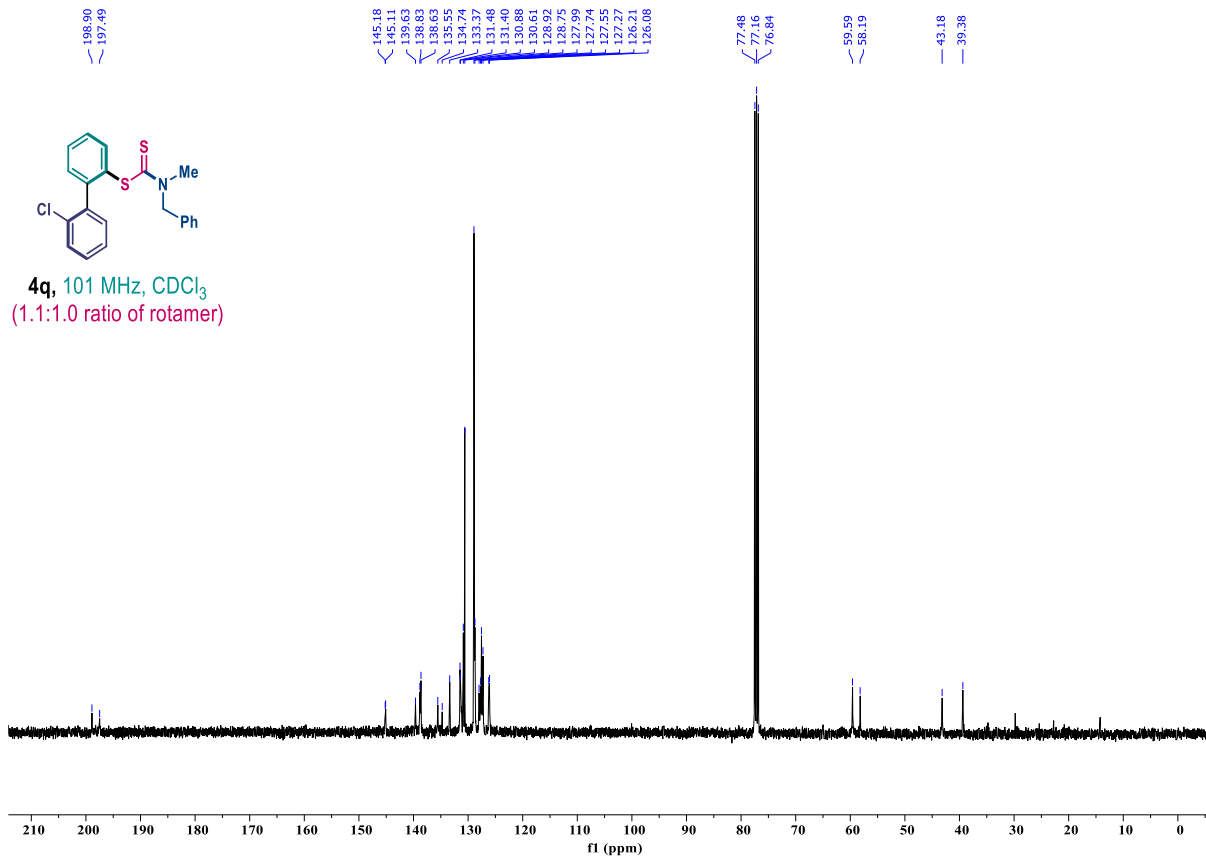



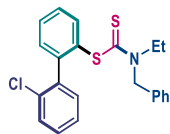

**4r**, 400 MHz, CDCl<sub>3</sub>  
(1.22:1.0 ratio of rotamer)

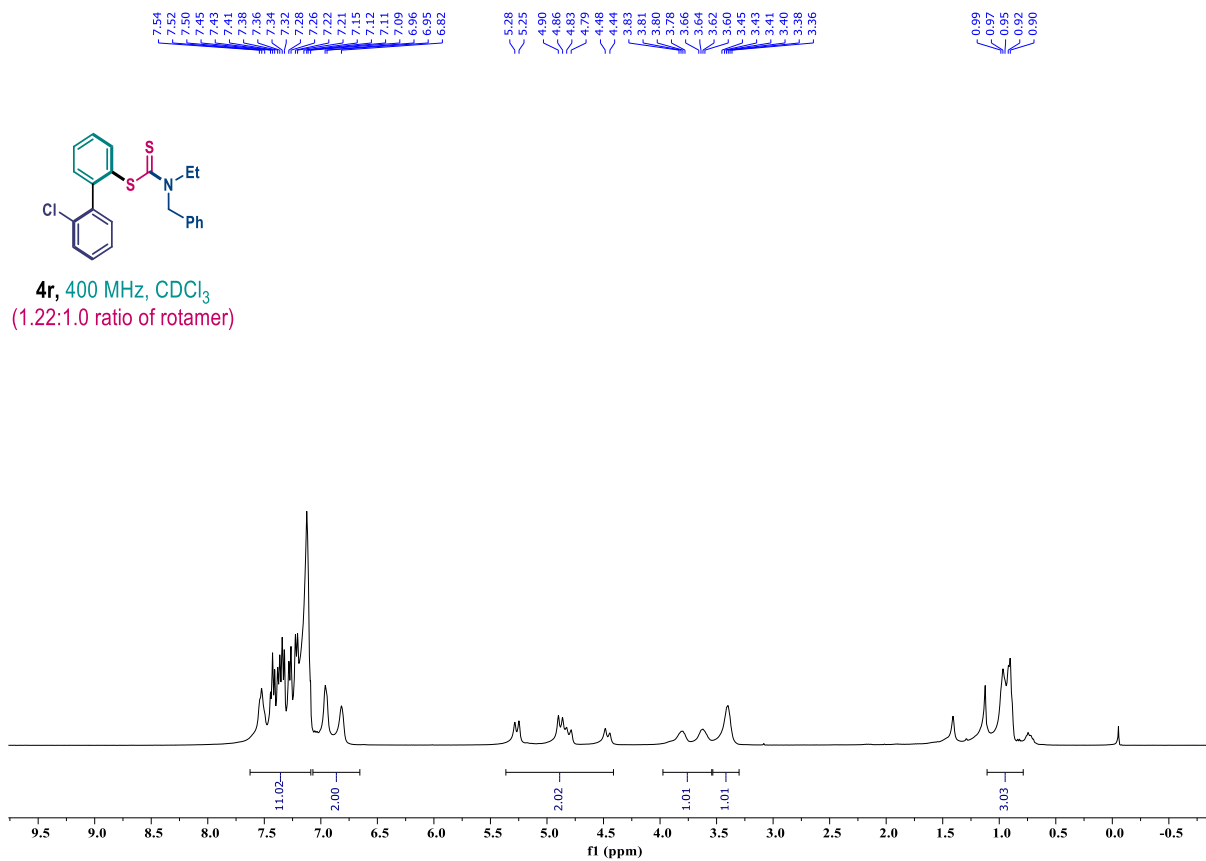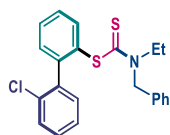

**4r**, 101 MHz, CDCl<sub>3</sub>  
(1.22:1.0 ratio of rotamer)

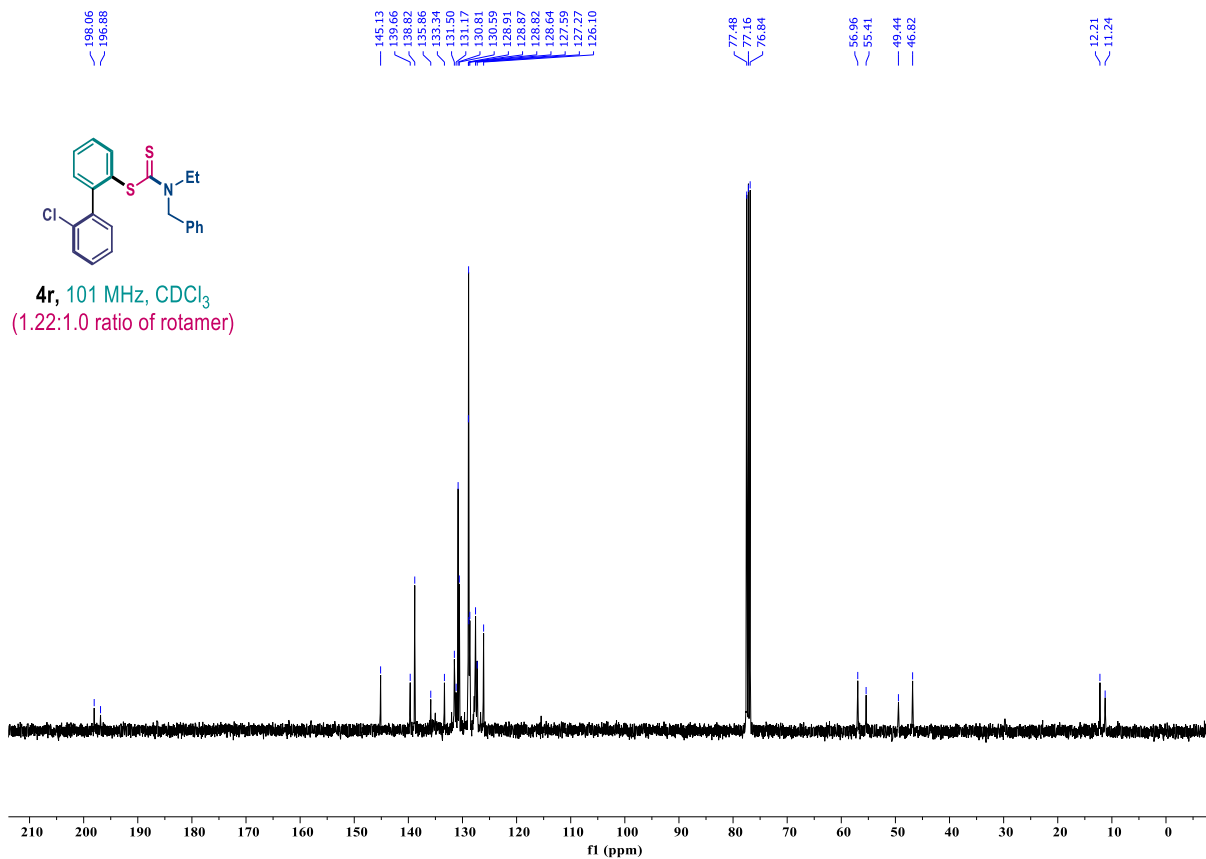

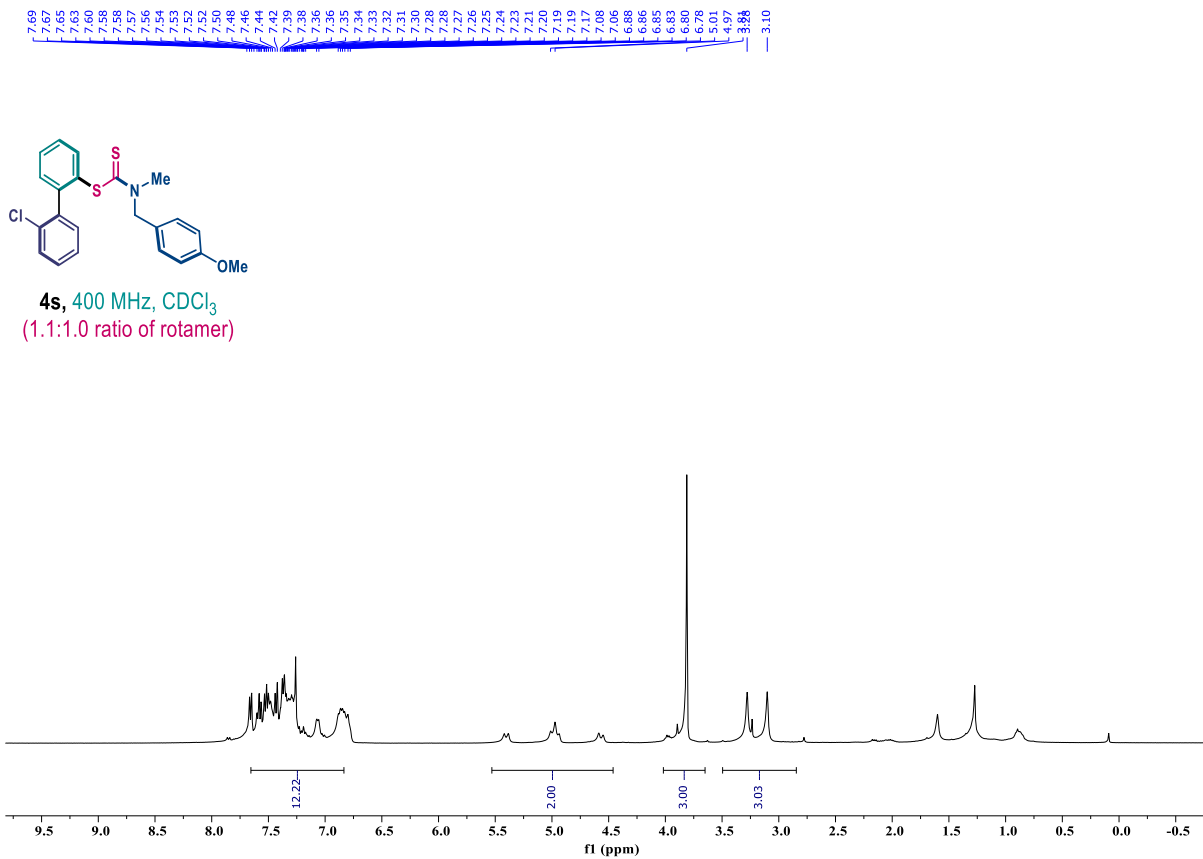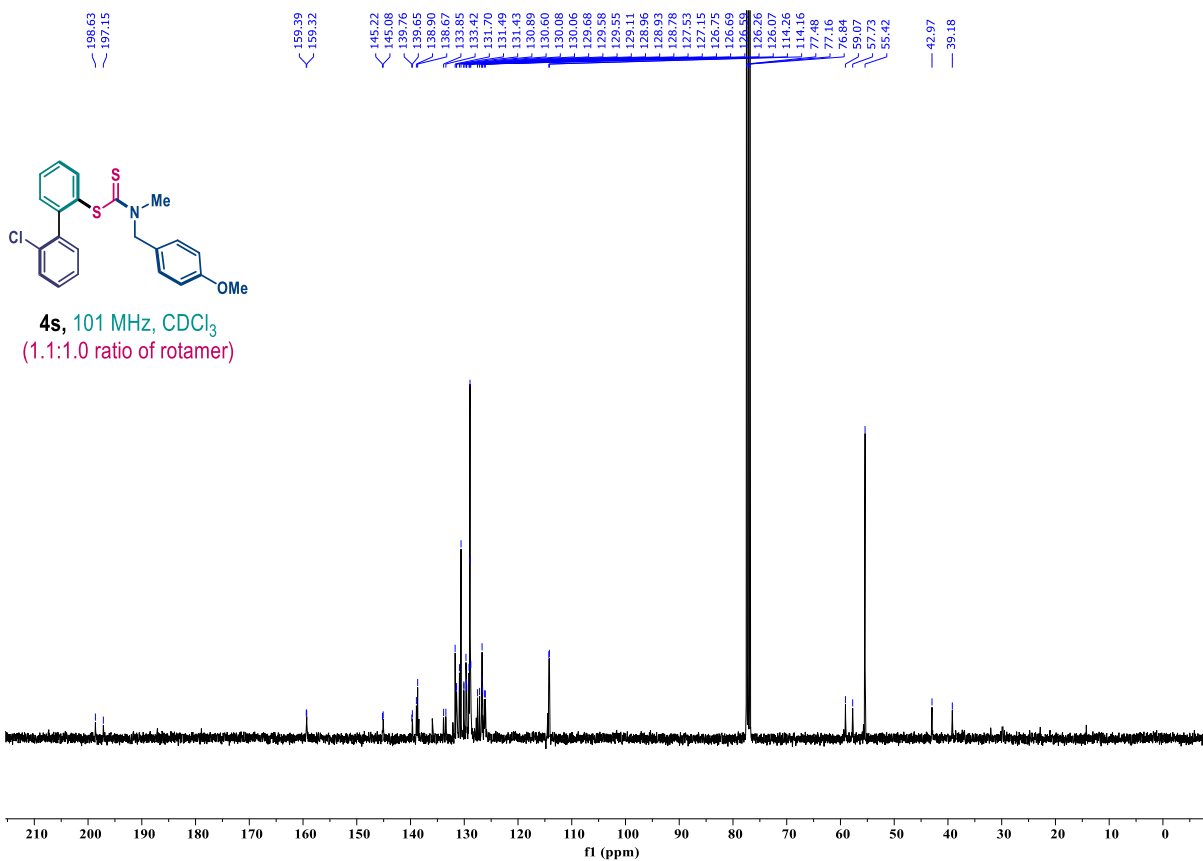

7.69  
7.67  
7.61  
7.59  
7.57  
7.54  
7.52  
7.50  
7.48  
7.46  
7.44  
7.43  
7.36  
7.35  
7.33  
7.31  
7.29  
7.28  
7.26  
7.24  
7.15  
7.12  
7.10  
6.99  
6.98  
5.78  
5.75  
5.64  
5.61  
5.59  
5.58  
5.57  
5.37  
5.33  
5.20  
5.17  
5.14  
5.10  
5.06  
5.01  
4.95  
4.91  
4.80  
4.72  
4.69  
4.65  
4.62  
4.61  
4.37  
4.36  
4.33  
4.31  
4.17  
4.13  
4.12  
4.09  
4.07  
4.05  
4.03

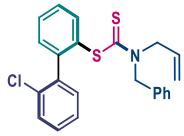

4t, 400 MHz, CDCl<sub>3</sub>  
(1:1 ratio of rotamer)

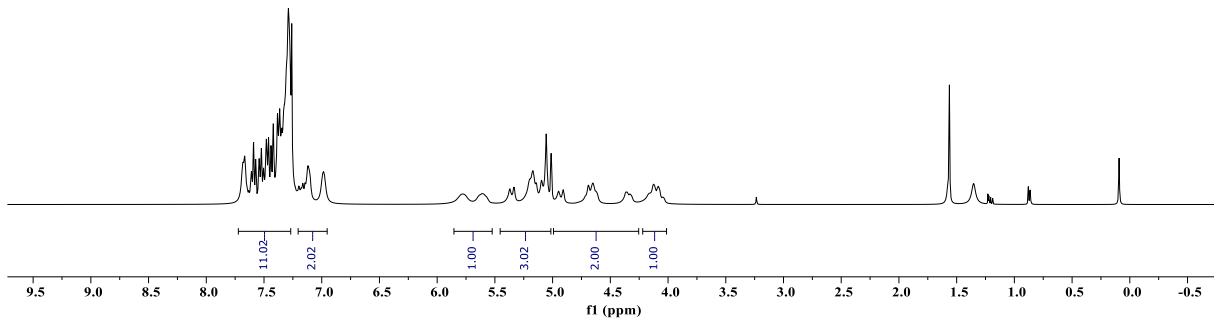

199.14  
196.33  
145.20  
139.66  
138.60  
138.43  
133.40  
131.71  
131.49  
131.42  
131.20  
130.88  
130.69  
130.16  
130.08  
129.69  
129.55  
128.97  
128.94  
128.91  
128.73  
127.78  
127.73  
127.72  
126.69  
126.21  
126.10  
118.58  
118.40

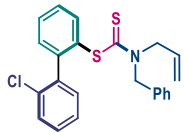

4t, 101 MHz, CDCl<sub>3</sub>  
(1:1 ratio of rotamer)

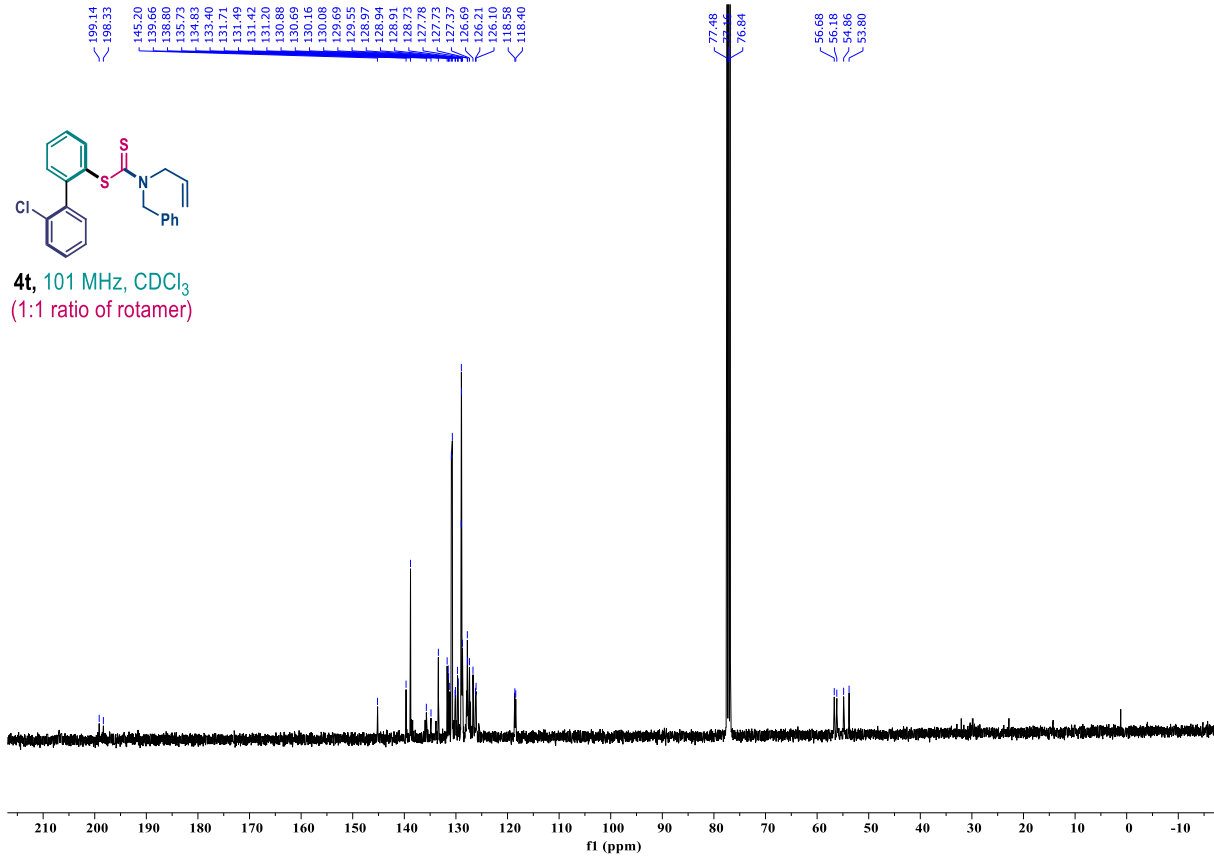

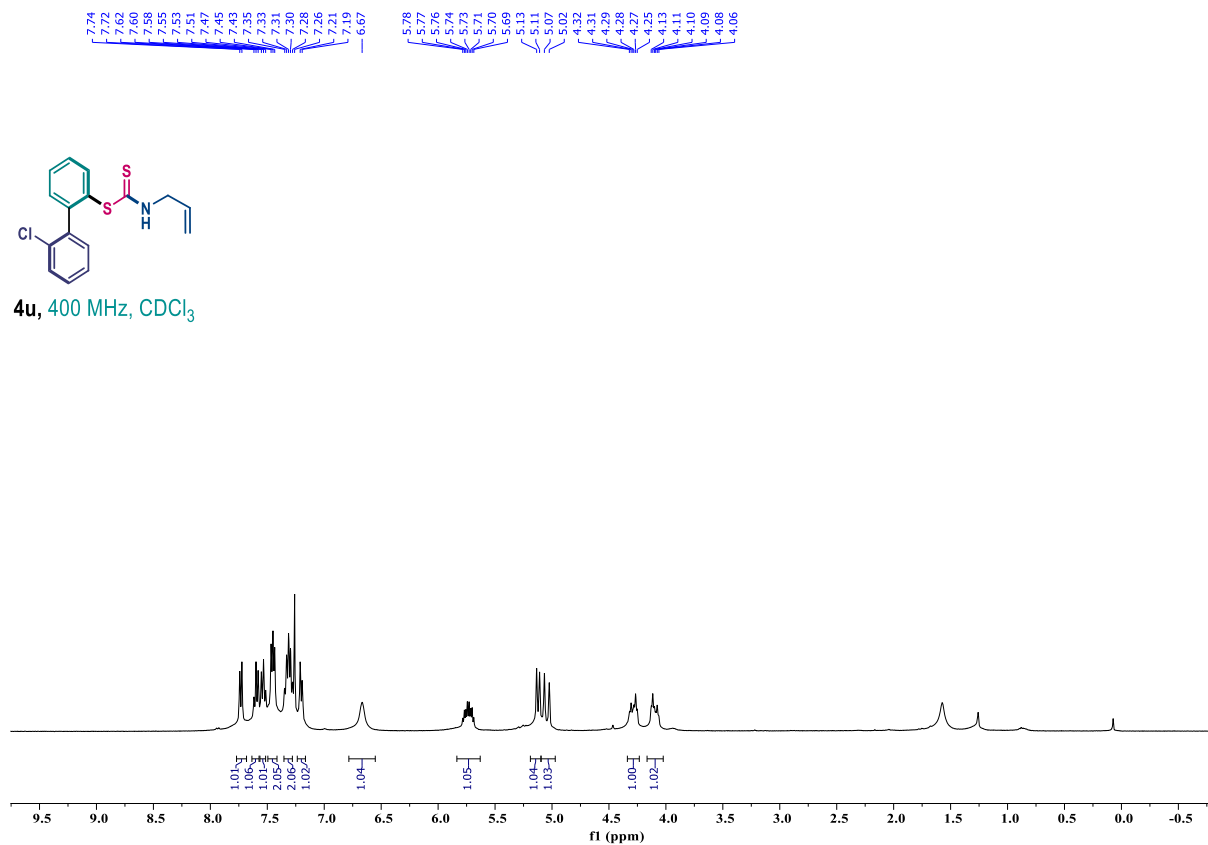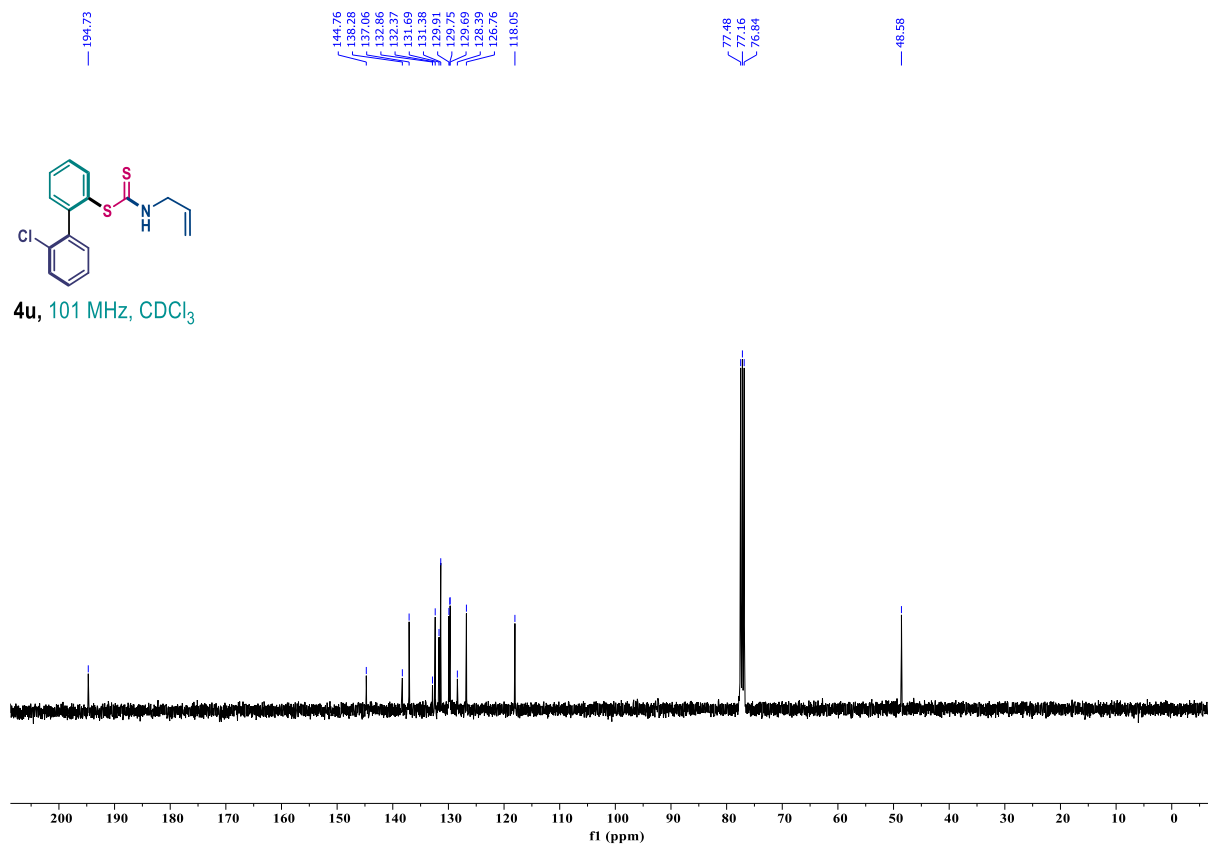

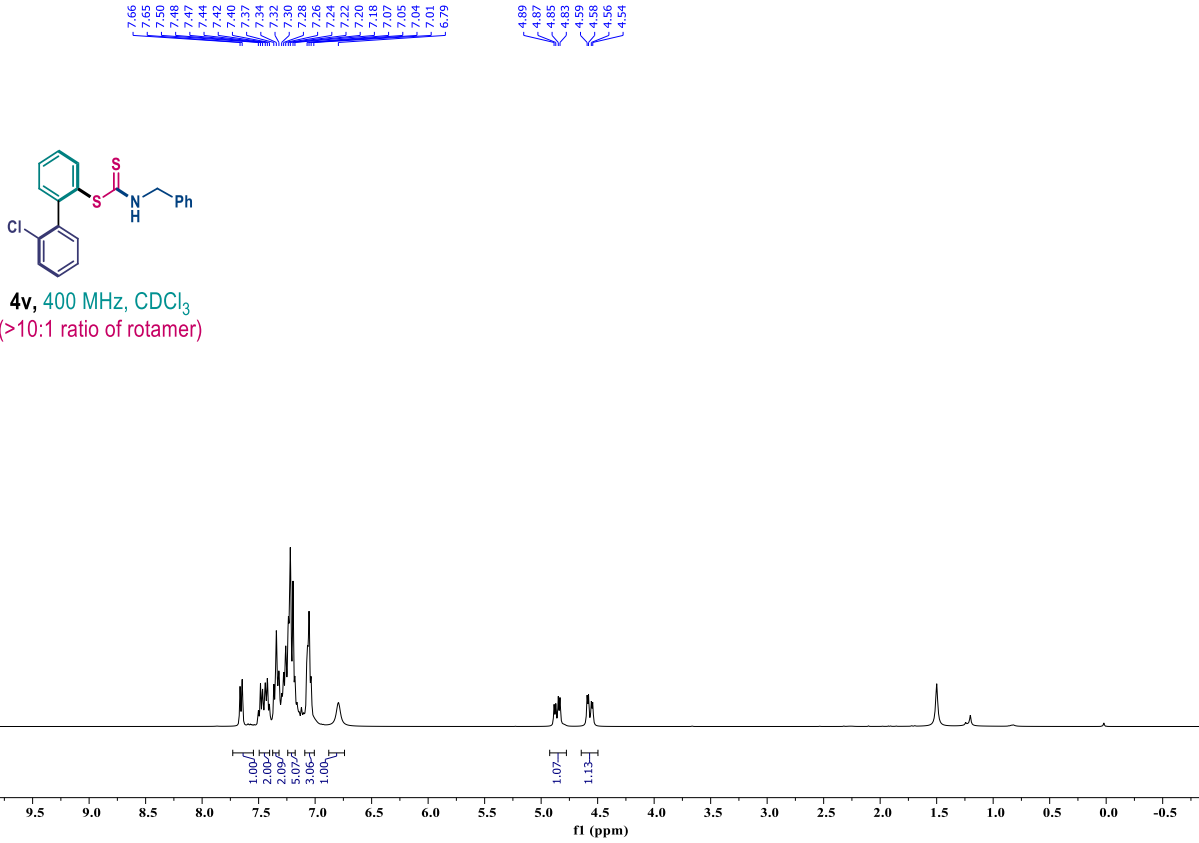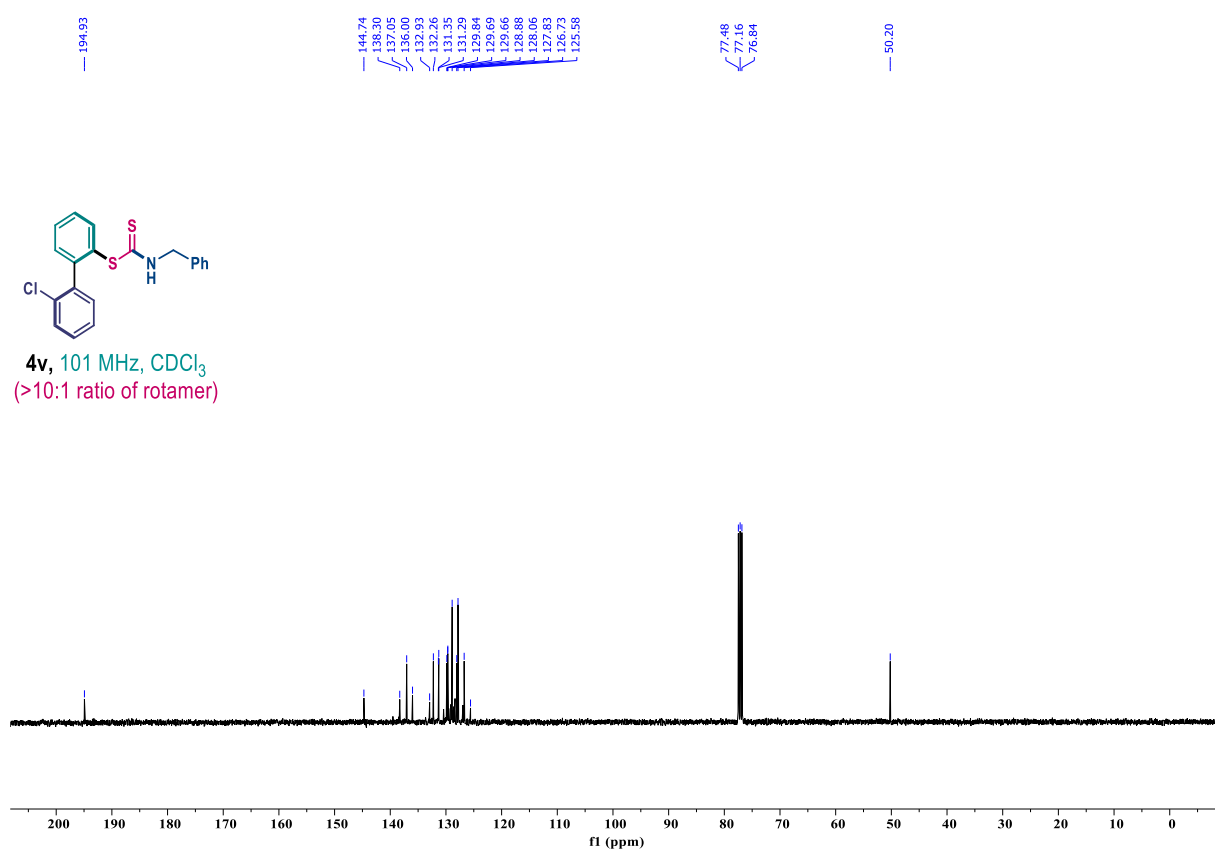

7.74  
7.72  
7.60  
7.59  
7.57  
7.56  
7.55  
7.54  
7.53  
7.52  
7.51  
7.50  
7.49  
7.43  
7.43  
7.42  
7.41  
7.41  
7.36  
7.35  
7.34  
7.33  
7.32  
7.31  
7.31  
7.30  
7.29  
7.28  
7.27  
7.27  
7.26  
7.25  
7.24  
7.24  
7.22  
7.20  
7.20  
7.15  
7.14  
7.13  
7.09  
7.02  
7.00  
6.88  
4.90  
4.88  
4.85  
4.70  
4.69  
4.67  
4.64  
4.62

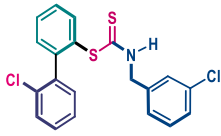

4w, 400 MHz, CDCl<sub>3</sub>

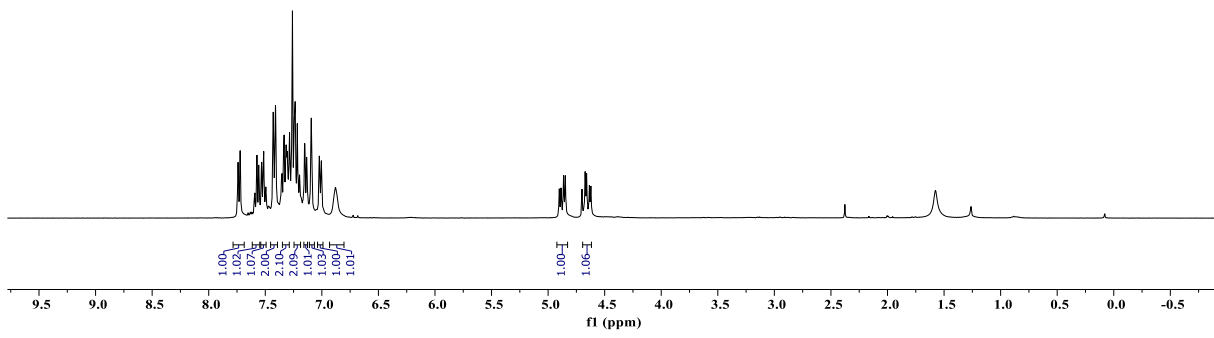

195.42

144.73  
138.17  
138.13  
137.08  
136.72  
132.82  
132.40  
131.50  
131.33  
130.10  
129.95  
129.80  
129.73  
128.22  
127.66  
127.75  
126.82  
125.94

77.48  
77.16  
76.84

49.29

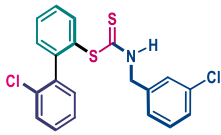

4w, 101 MHz, CDCl<sub>3</sub>

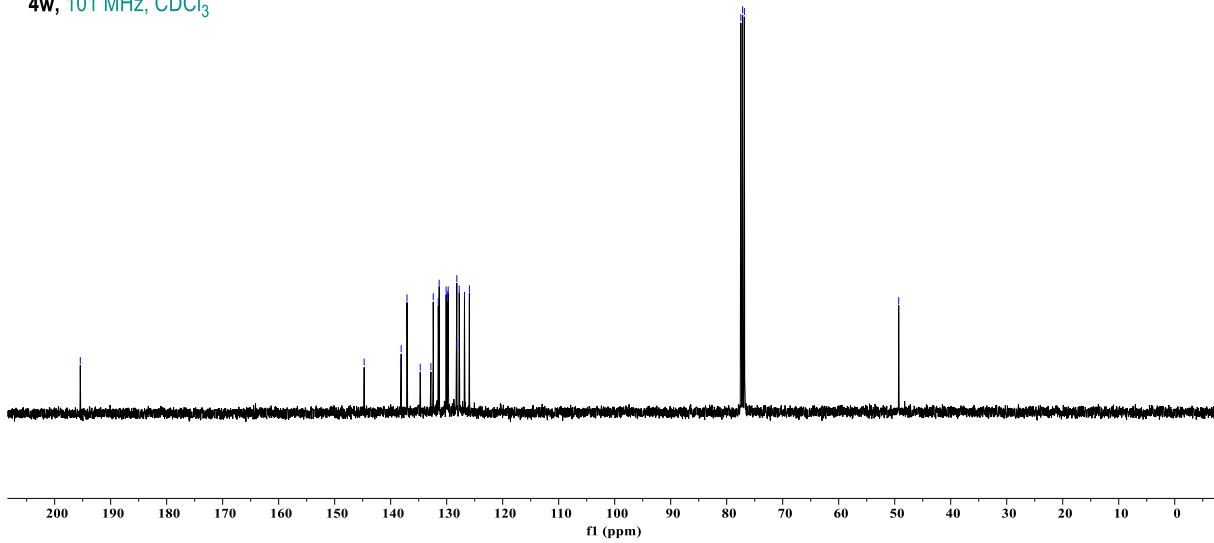

7.59  
7.57  
7.57  
7.46  
7.44  
7.44  
7.43  
7.42  
7.41  
7.41  
7.38  
7.37  
7.37  
7.35  
7.35  
7.28  
7.27  
7.26  
7.26  
7.24  
7.24  
7.21  
7.21  
7.19  
7.18  
7.17  
7.16  
7.16  
7.15  
7.15  
7.14  
7.14  
7.12  
7.11  
7.10  
7.10  
7.04  
7.03  
7.03  
7.01  
7.00  
7.00  
6.99  
6.98  
6.98  
6.98  
6.92  
6.90  
6.75  
6.74  
6.74  
6.72  
6.72  
4.74  
4.73  
4.70  
4.69  
4.69  
4.54  
4.53  
4.52  
4.50  
4.48  
4.46

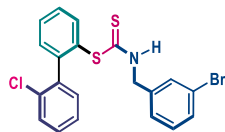

4x, 400 MHz, CDCl<sub>3</sub>

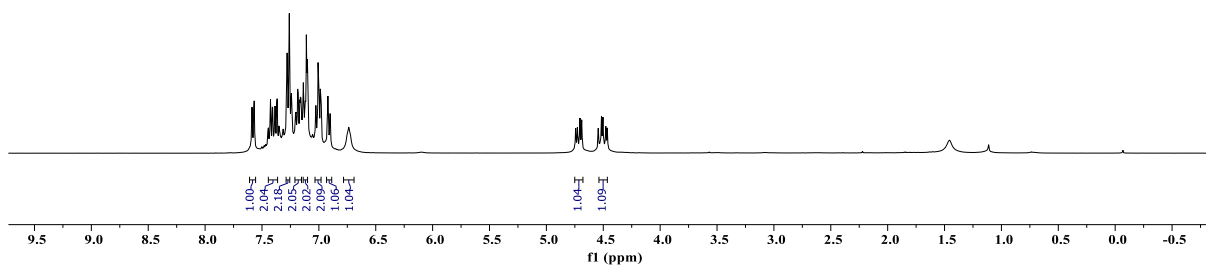

195.39

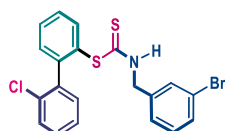

4x, 101 MHz, CDCl<sub>3</sub>

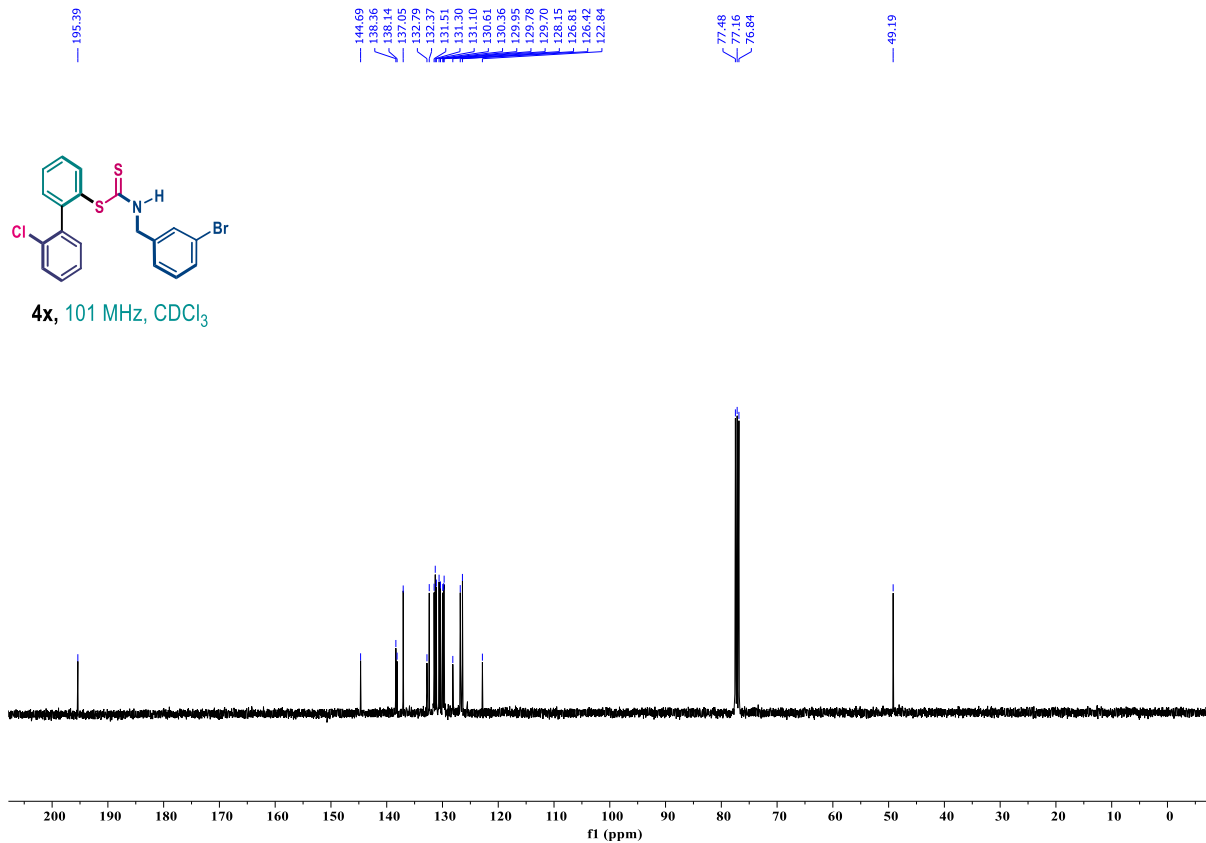

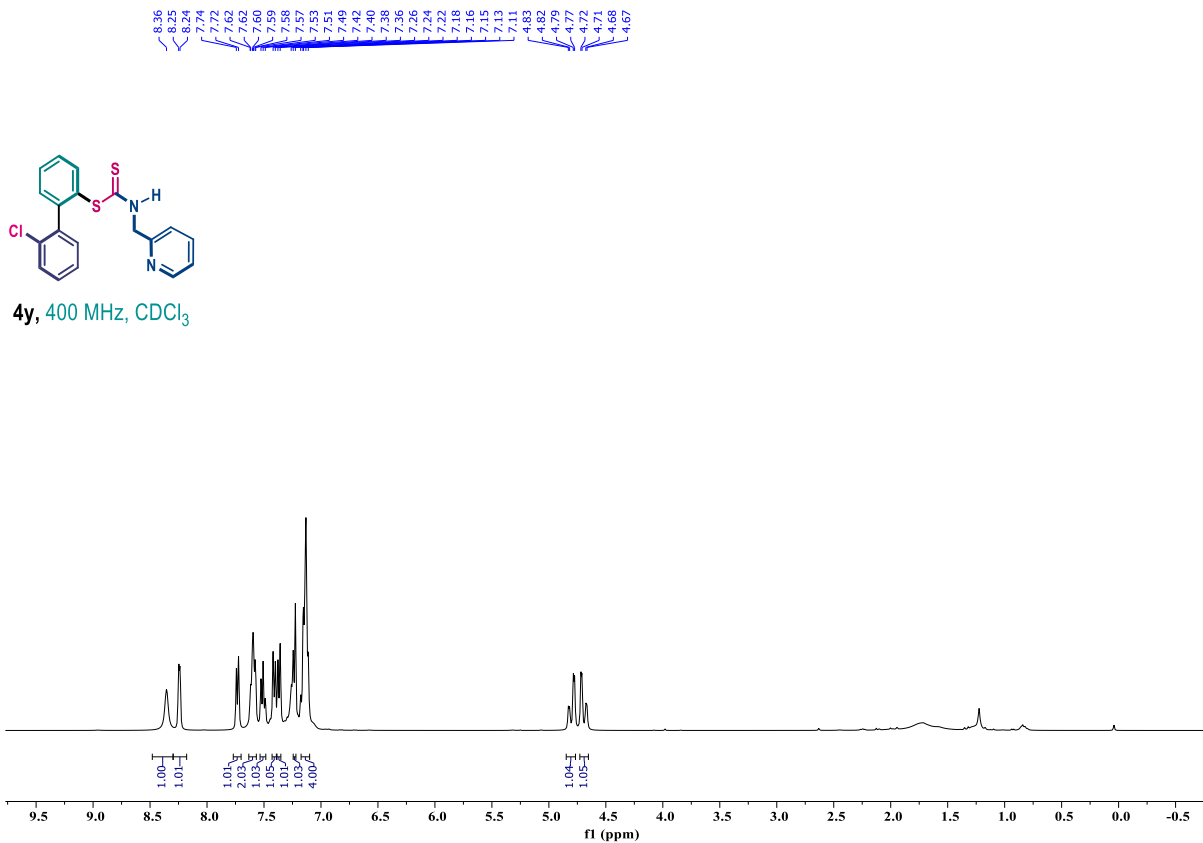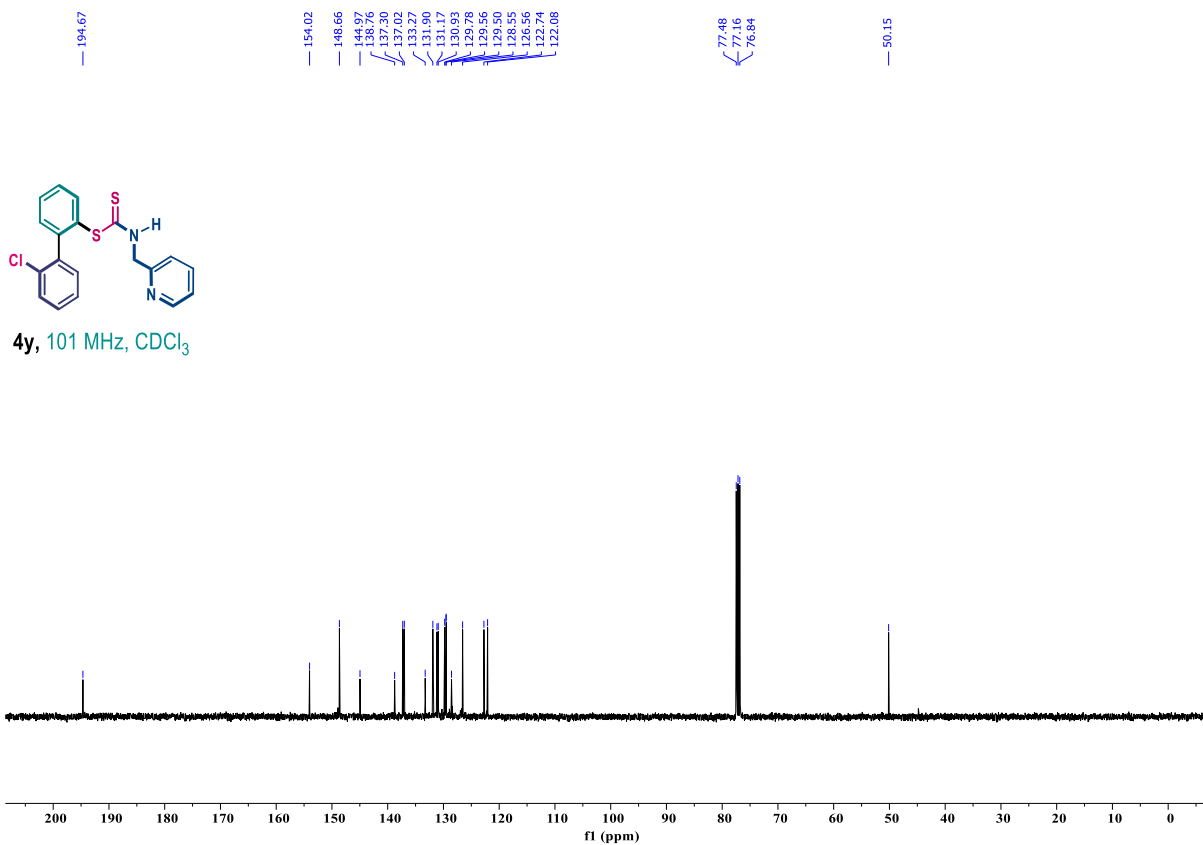



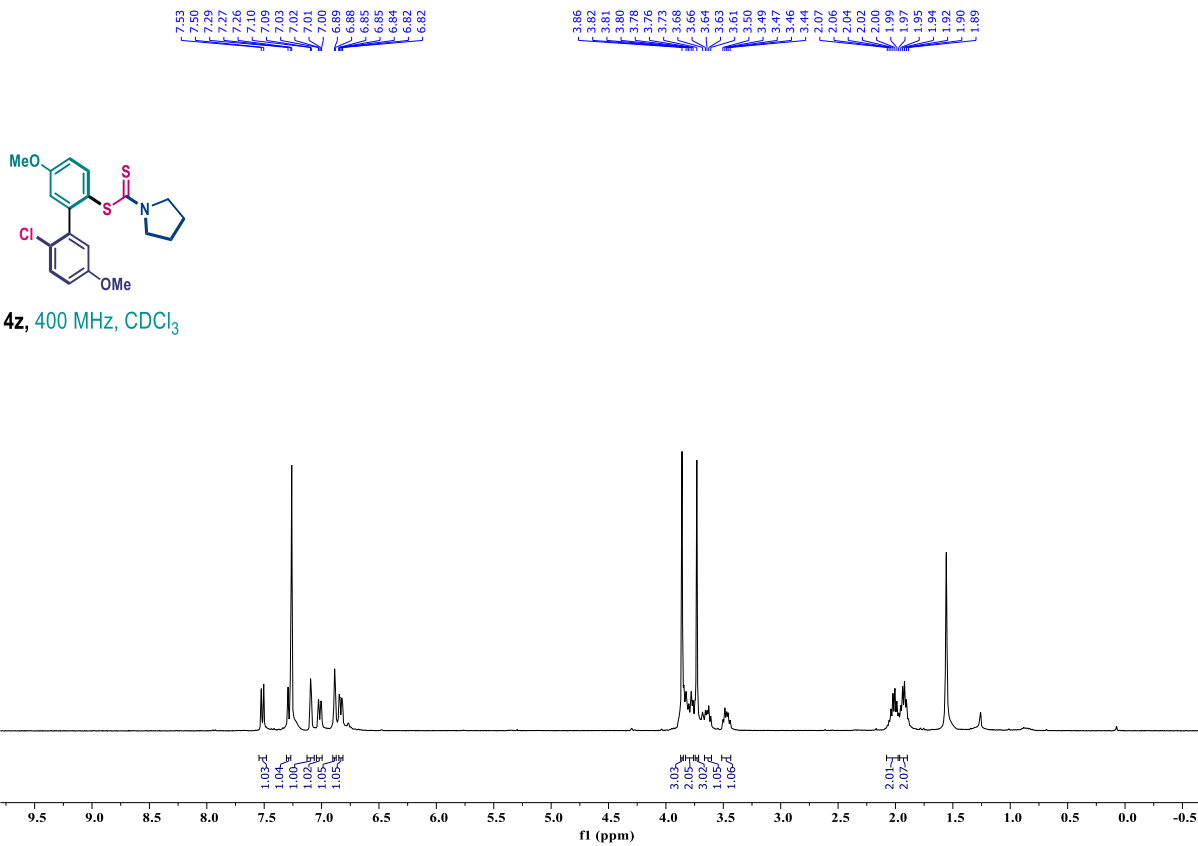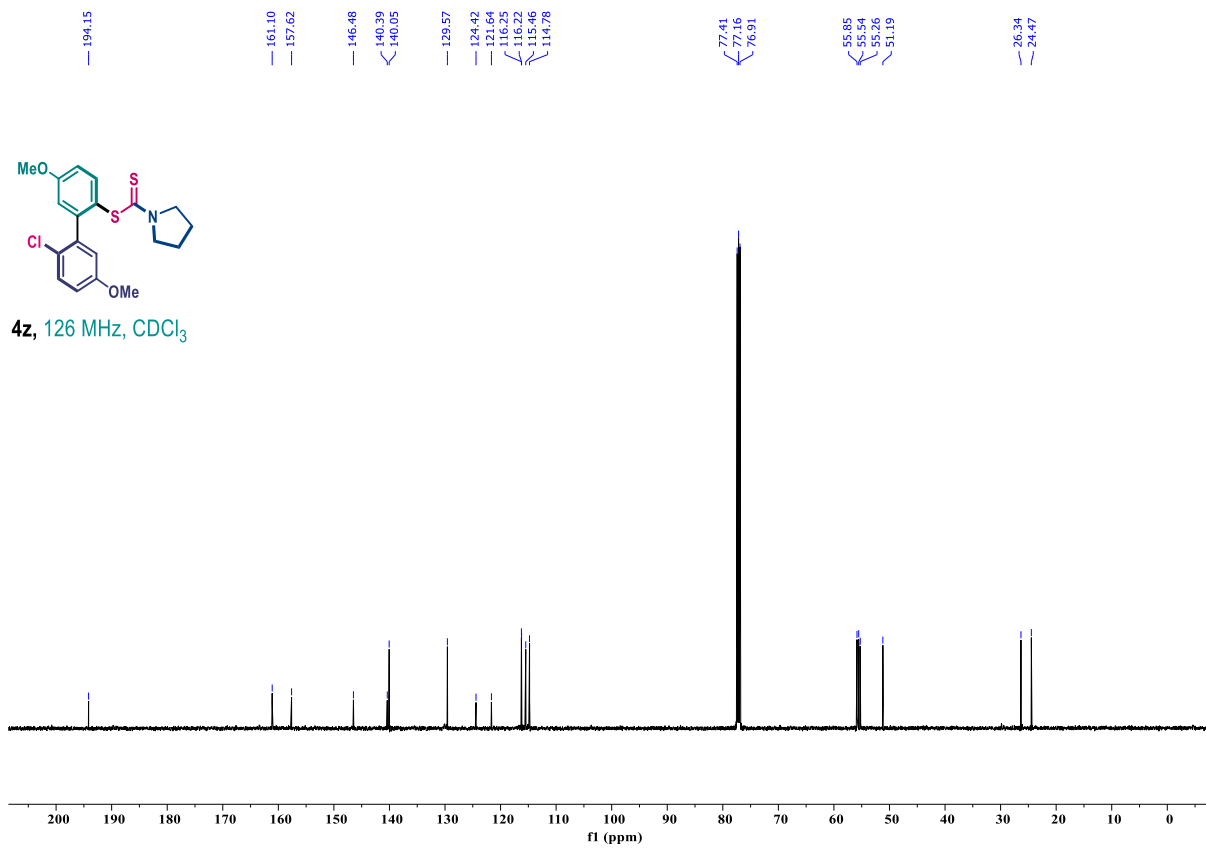

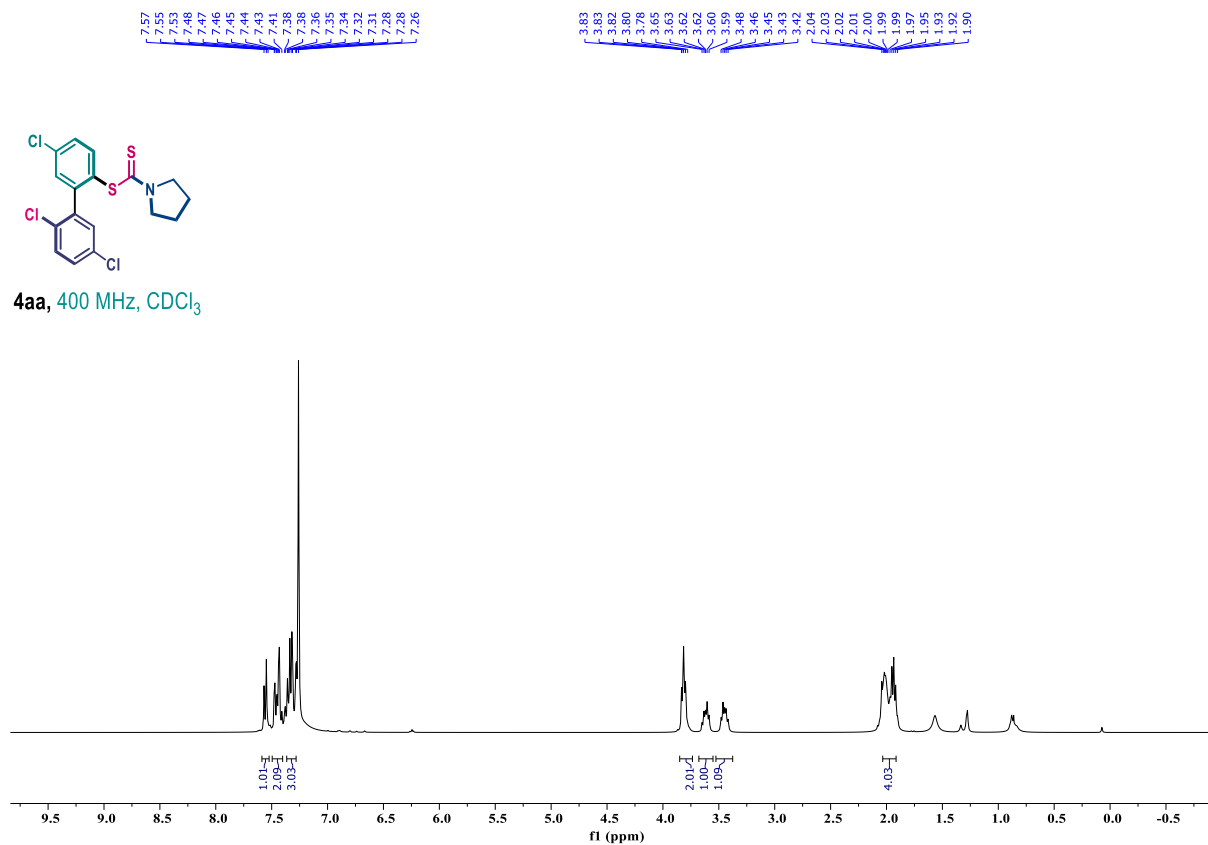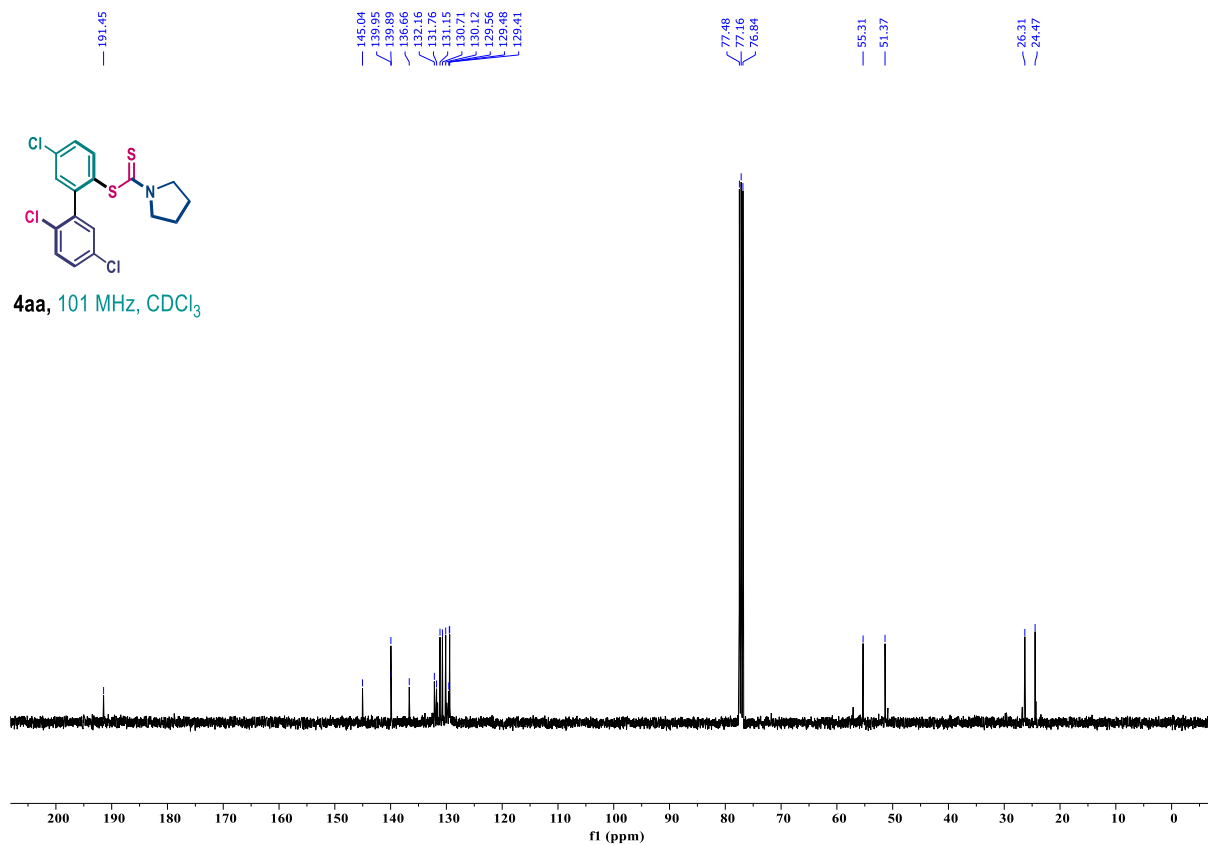

7.63  
7.61  
7.61  
7.52  
7.52  
7.51  
7.49  
7.49  
7.48  
7.47  
7.46  
7.45  
7.45  
7.43  
7.43  
7.41  
7.41  
7.40  
7.40  
7.38  
7.38  
7.31  
7.31  
7.29  
7.29  
7.28  
7.27  
7.27  
7.26  
7.25  
7.25  
7.24  
7.24  
7.23  
7.23  
7.23  
7.14  
7.13  
7.13  
7.08  
7.07  
7.06  
7.05  
3.84  
3.83  
3.83  
3.82  
3.81  
3.80  
3.80  
3.79  
3.78  
3.78  
3.74  
3.74  
3.72  
3.63  
3.61  
3.61  
3.60  
3.58  
3.45  
3.44  
3.42  
3.42  
3.41  
3.41  
2.42  
2.28  
2.28  
2.02  
2.02  
2.00  
1.99  
1.97  
1.97  
1.95  
1.94  
1.94  
1.91  
1.91  
1.90  
1.89  
1.89  
1.87  
1.86  
1.85

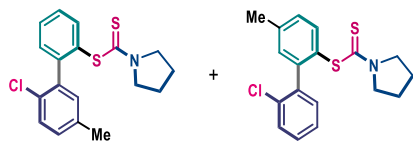

**4ab+4ab'**  
(regioisomeric ratio = 2:1)  
400 MHz, CDCl<sub>3</sub>

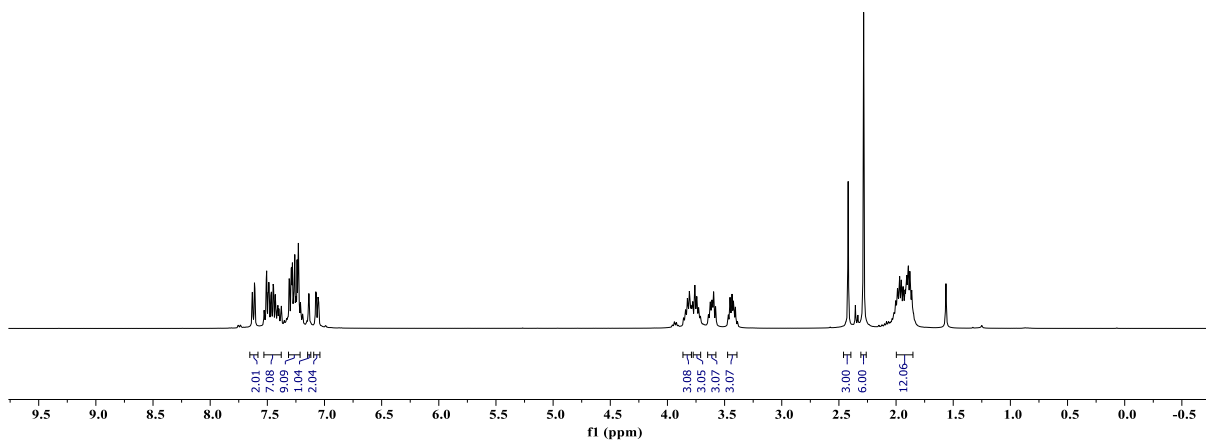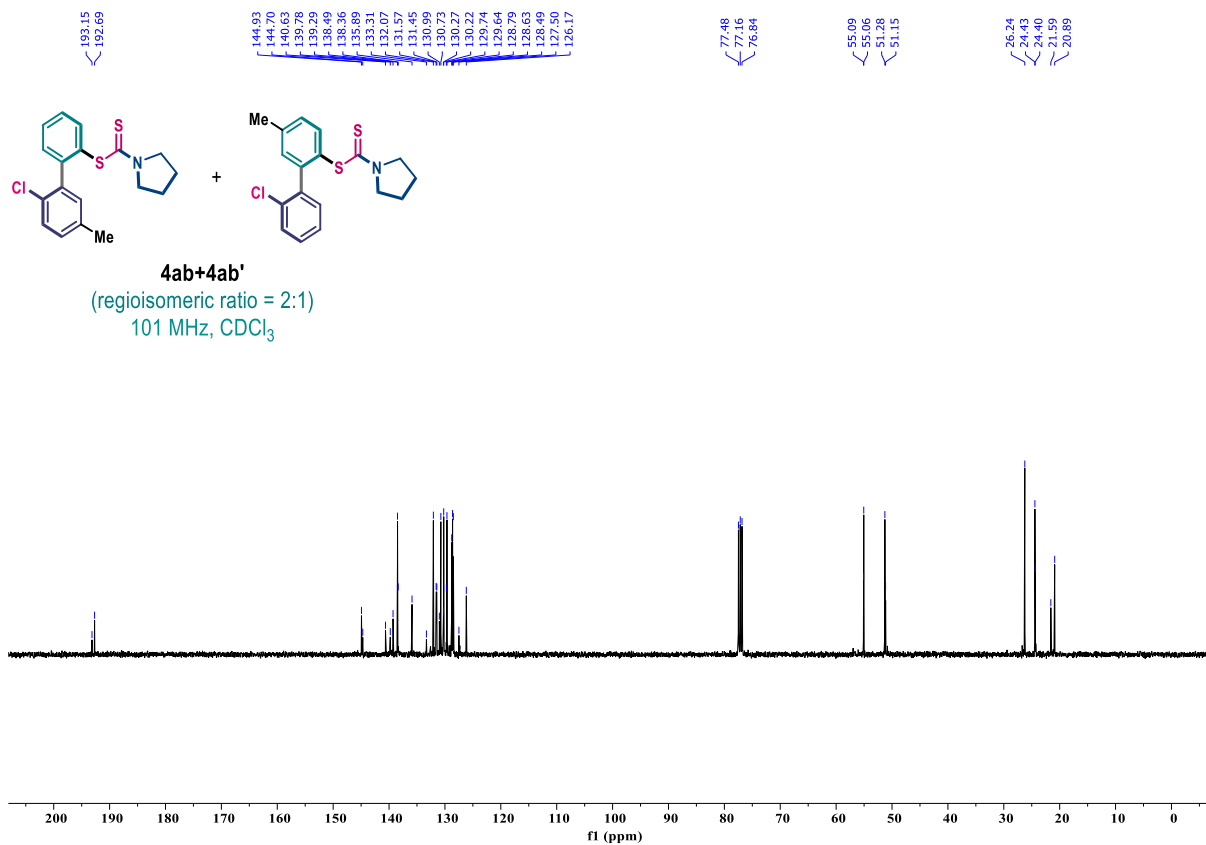

8.12, 8.04, 8.04, 8.02, 7.90, 7.90, 7.76, 7.74, 7.52, 7.50, 7.45, 7.45, 7.00, 7.00, 7.00, 7.00, 7.43, 7.43, 7.42, 7.42, 7.40, 7.40, 7.34, 7.33, 7.32, 7.32, 7.30, 7.30, 7.29, 7.29, 7.27, 7.27, 7.26, 7.25, 7.25, 7.25, 3.85, 3.85, 3.81, 3.81, 3.80, 3.80, 3.78, 3.78, 3.76, 3.74, 3.74, 3.65, 3.65, 3.64, 3.64, 3.63, 3.61, 3.61, 3.49, 3.49, 3.49, 3.47, 3.46, 3.46, 3.44, 3.44, 3.43, 2.64, 2.53, 2.06, 2.06, 2.05, 2.04, 2.04, 2.03, 2.03, 2.02, 2.01, 2.00, 2.00, 1.99, 1.99, 1.98, 1.97, 1.97, 1.96, 1.96, 1.95, 1.95, 1.94, 1.94, 1.93, 1.92, 1.92, 1.91, 1.91, 1.89, 1.89, 1.88

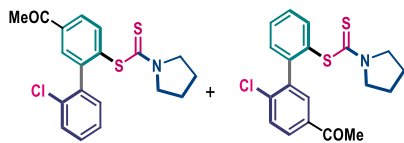

**4ac+4ac'**  
(regioisomeric ratio = 6:1)  
400 MHz, CDCl<sub>3</sub>

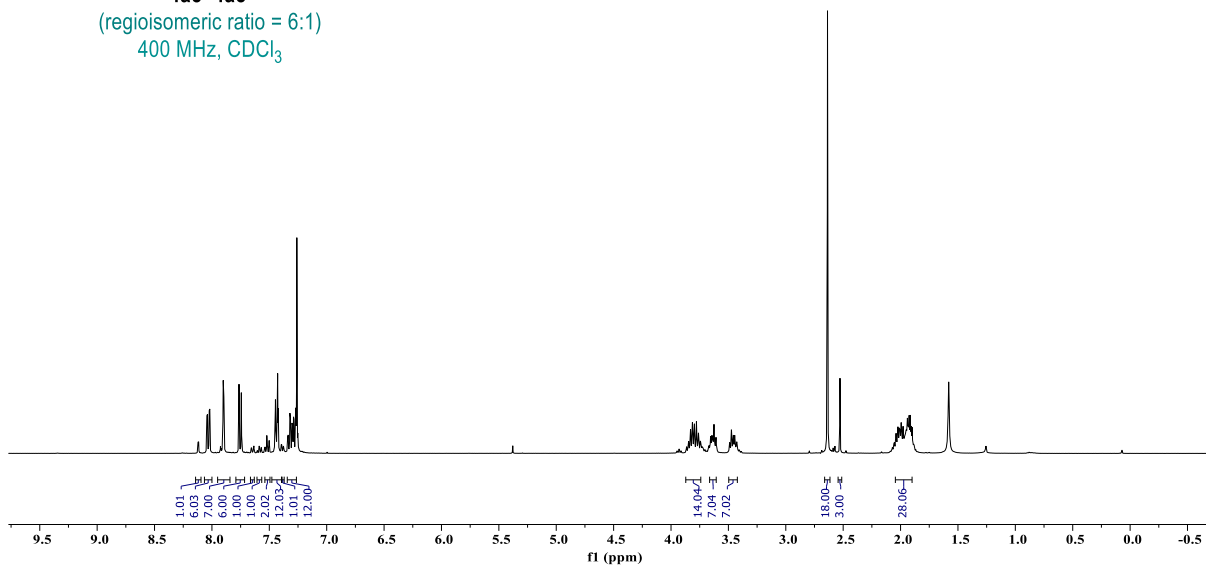

197.38  
191.22

145.04  
138.91  
138.85  
138.81  
138.14  
136.55  
133.44  
132.42  
131.87  
131.80  
130.64  
129.48  
129.39  
129.35  
129.07  
128.25  
128.21  
126.46

77.48  
77.16  
76.84

55.24  
55.17  
51.48  
51.30

26.90  
26.31  
24.50  
24.46

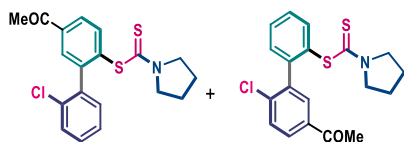

**4ac+4ac'**  
(regioisomeric ratio = 6:1)  
101 MHz, CDCl<sub>3</sub>

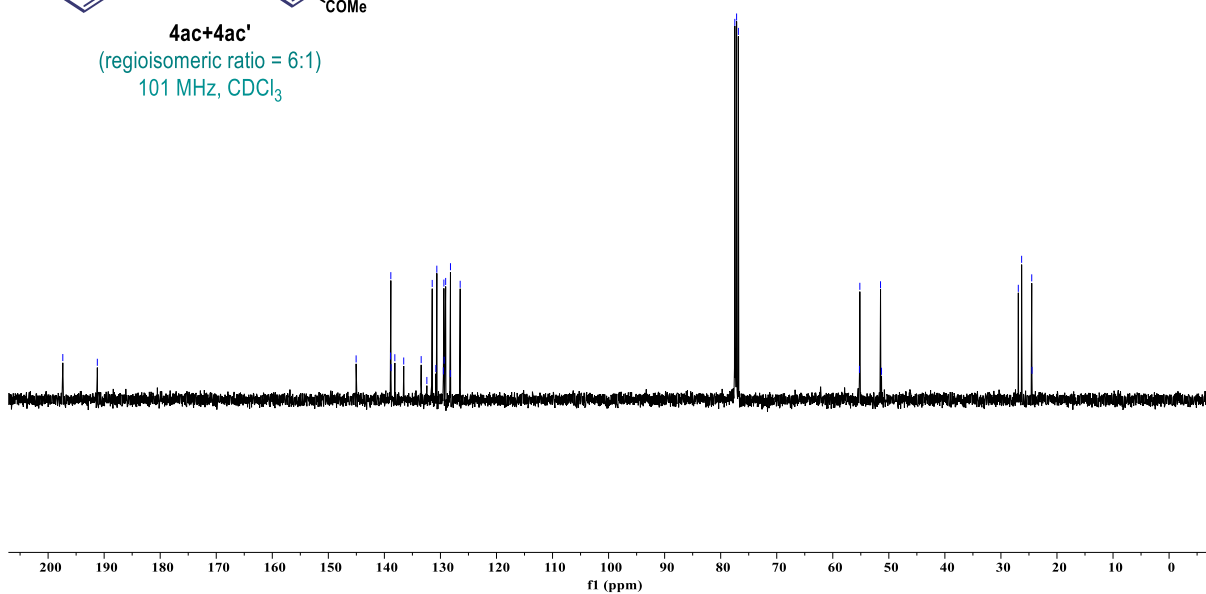

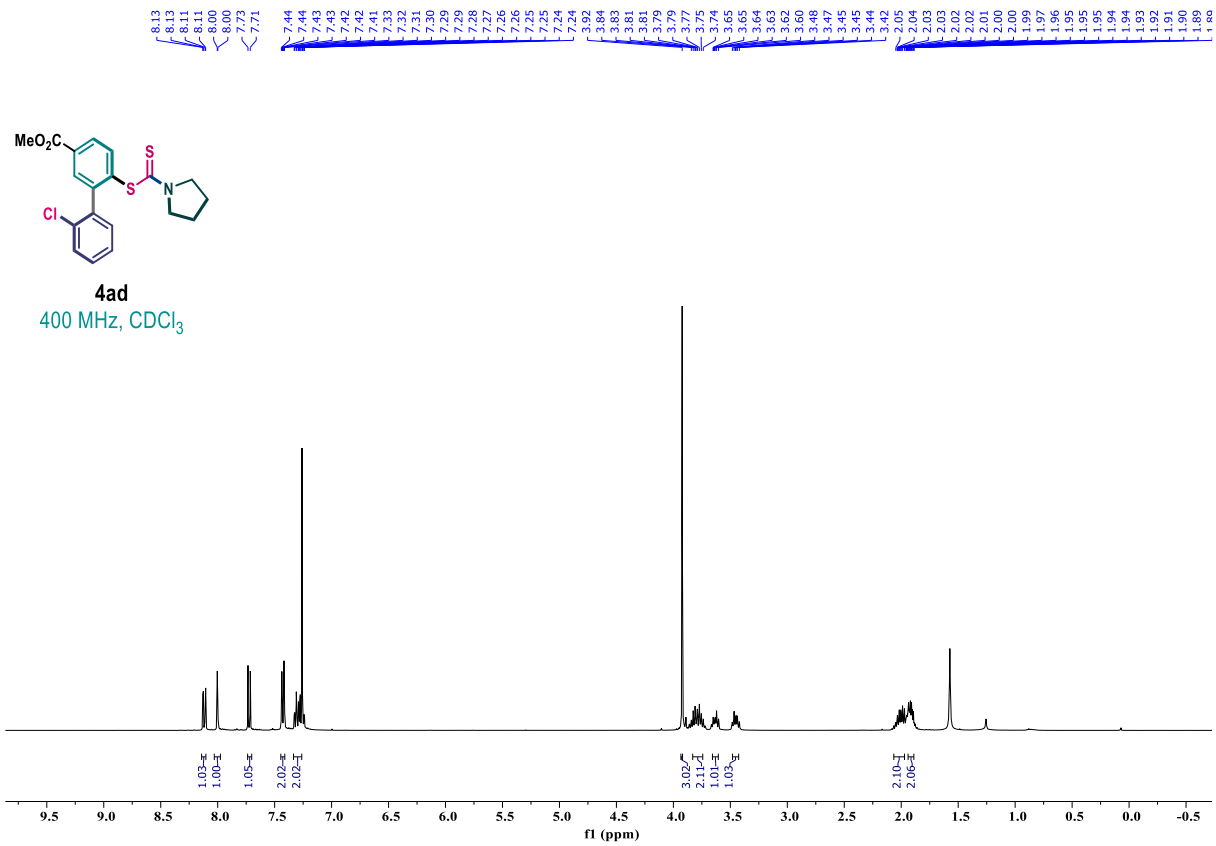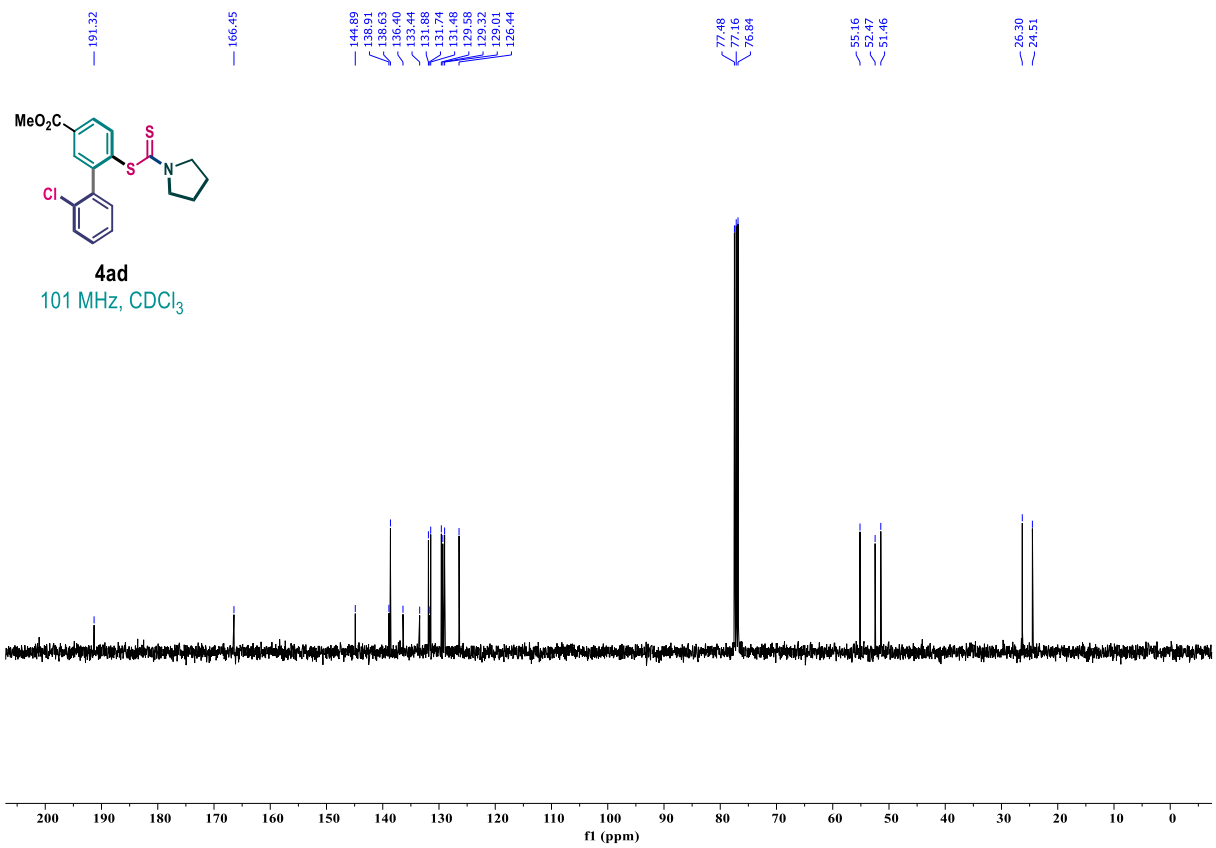

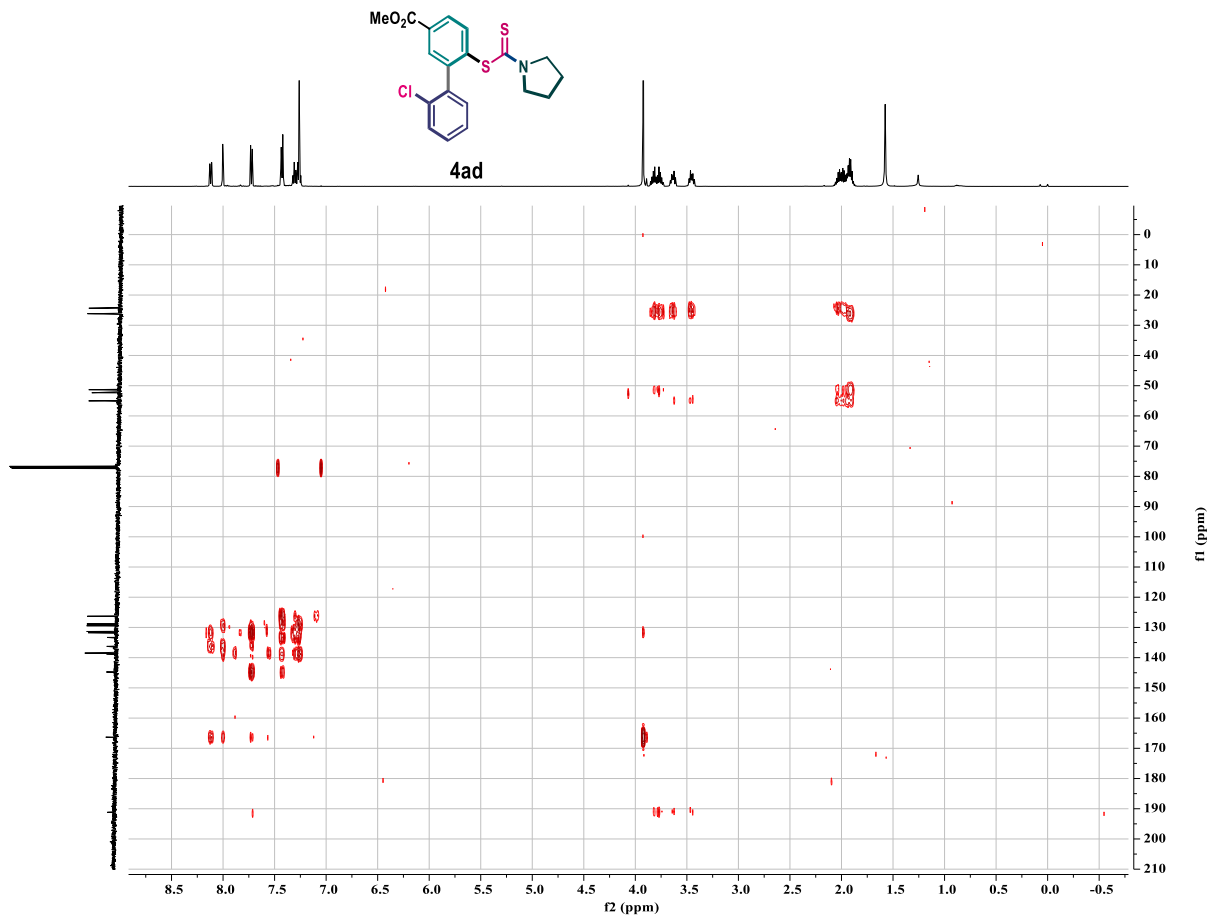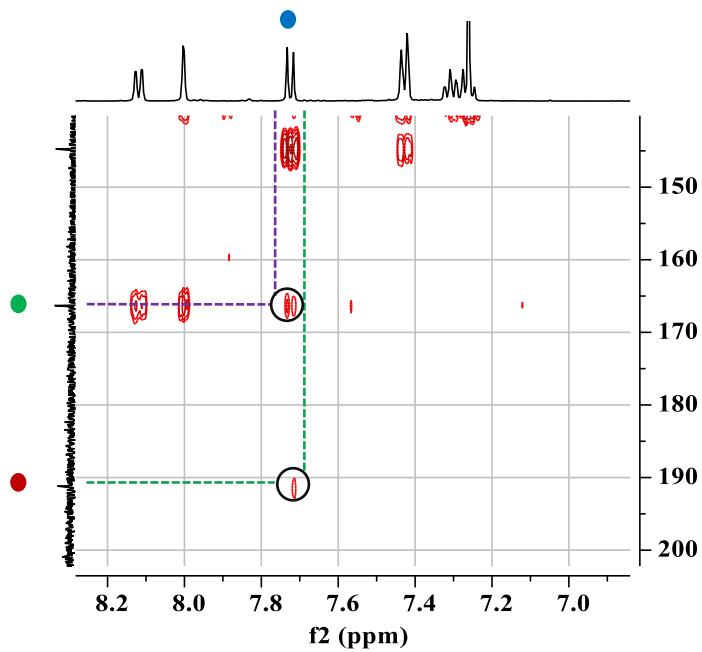

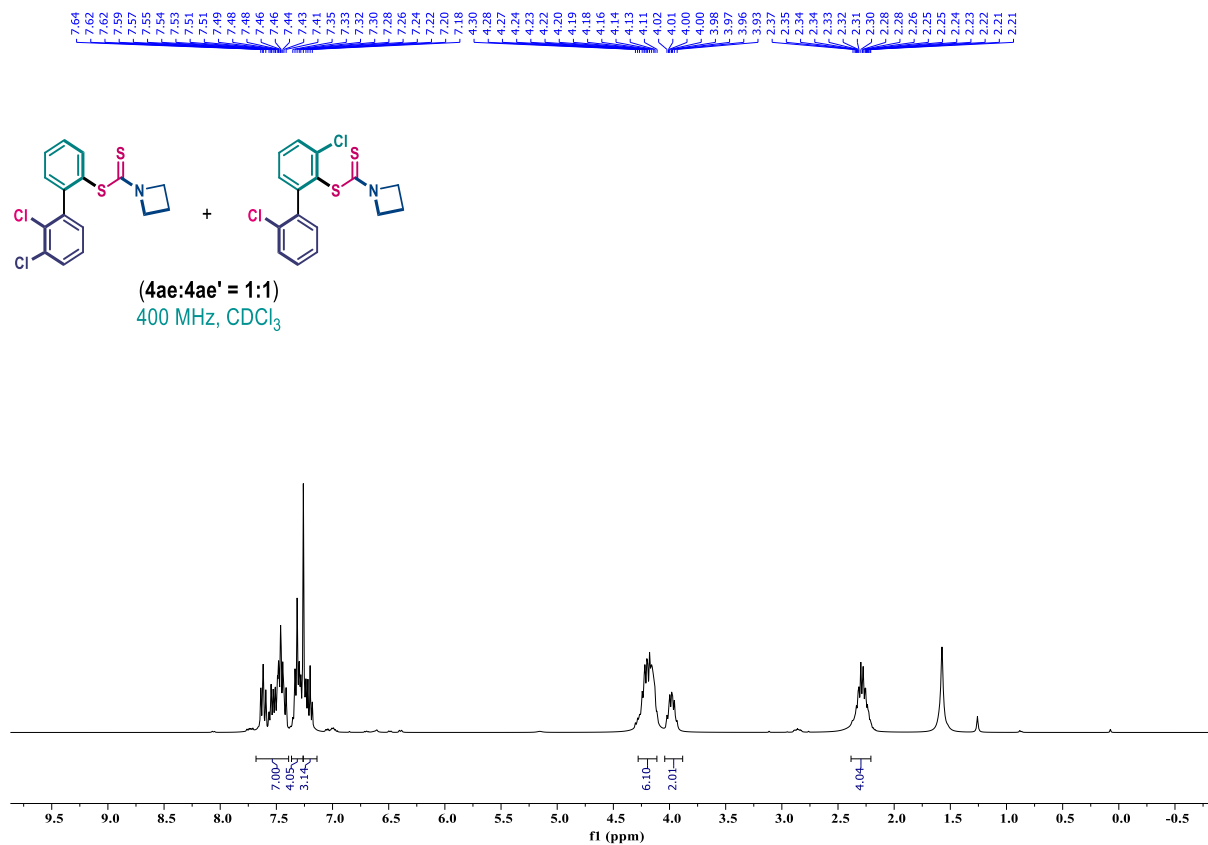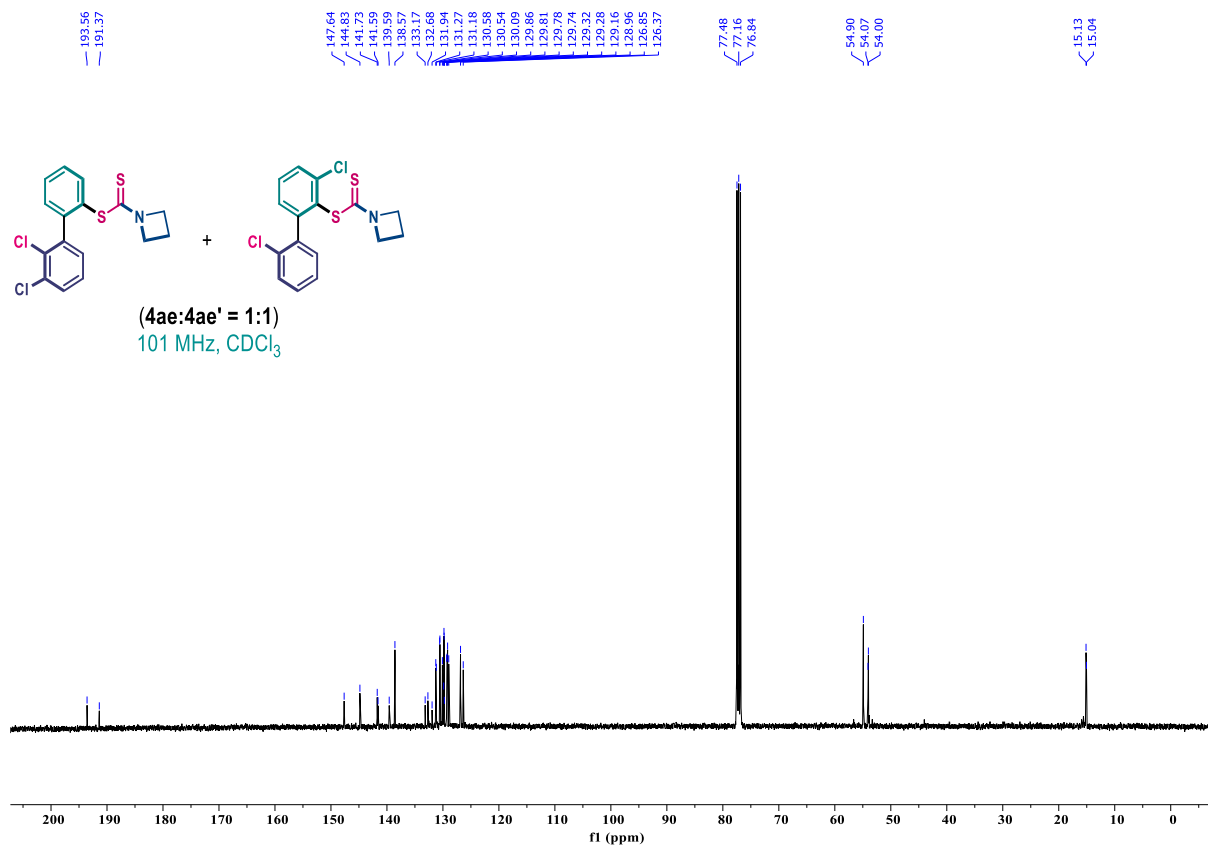

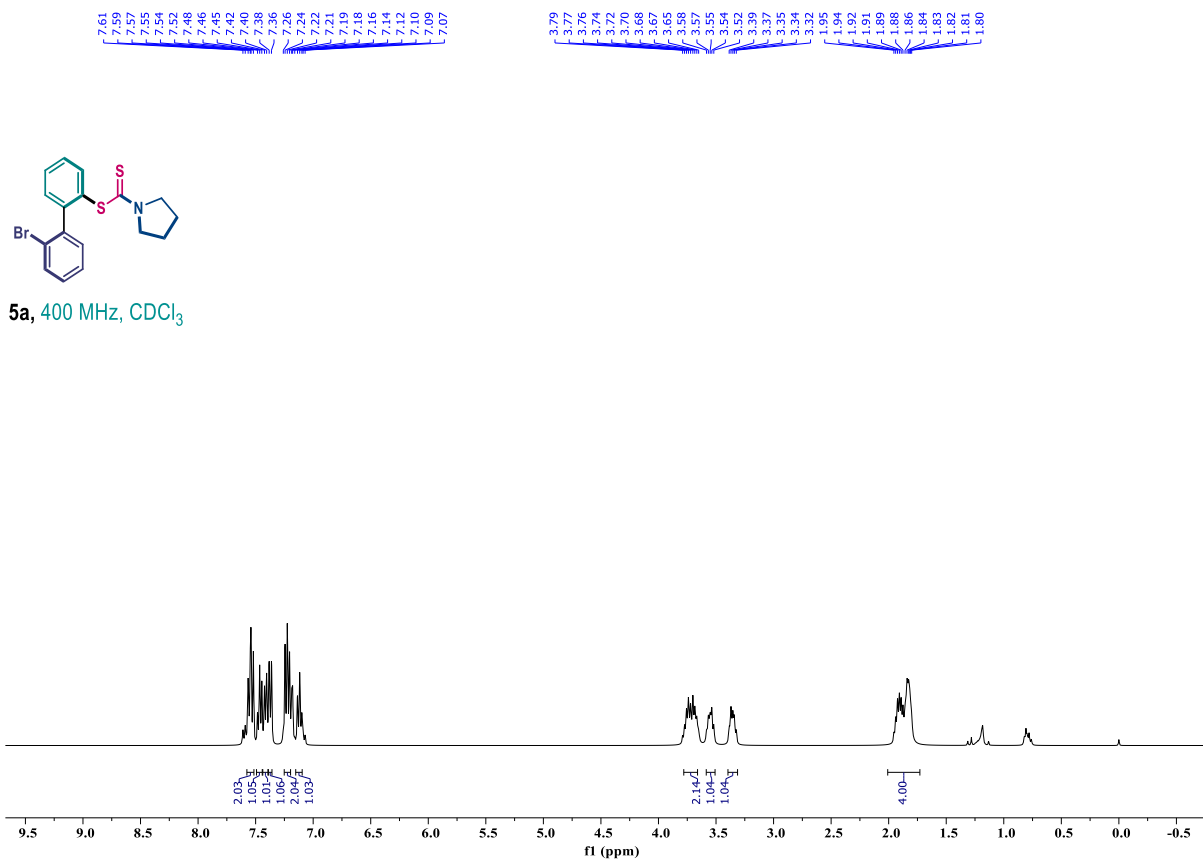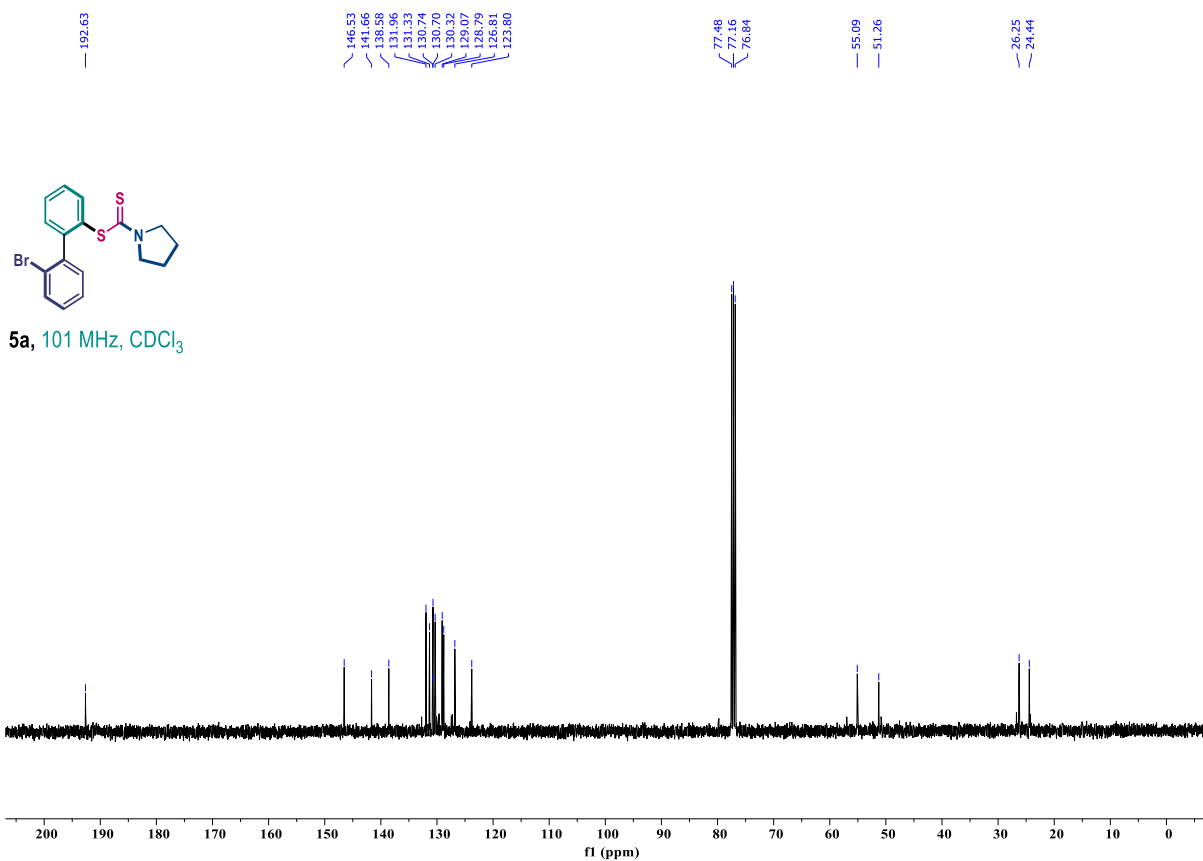



7.68  
7.67  
7.66  
7.64  
7.64  
7.63  
7.63  
7.61  
7.58  
7.56  
7.54  
7.54  
7.52  
7.52  
7.50  
7.50  
7.49  
7.48  
7.47  
7.46  
7.44  
7.42  
7.42  
7.40  
7.37  
7.35  
7.33  
7.33  
7.32  
7.31  
7.31  
7.30  
7.28  
7.28  
7.24  
7.24  
7.22  
7.22  
7.20  
7.20  
4.22  
4.21  
4.20  
4.19  
4.19  
4.18  
4.17  
4.16  
4.16  
4.14  
4.13  
4.13  
4.11  
4.07  
3.97  
3.95  
3.95  
3.93  
3.92  
3.91  
3.90  
2.41  
2.39  
2.37  
2.34  
2.32  
2.31  
2.30  
2.29  
2.28  
2.27  
2.27  
2.26  
2.25  
2.25  
2.24  
2.22  
2.22  
2.21  
2.20

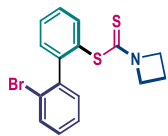

5b, 400 MHz, CDCl<sub>3</sub>

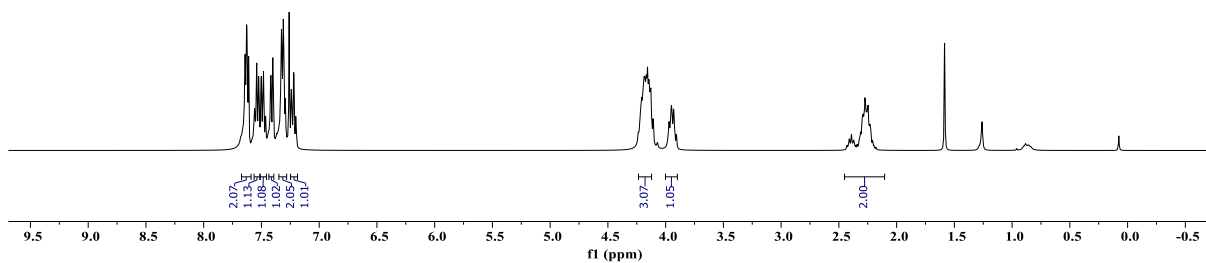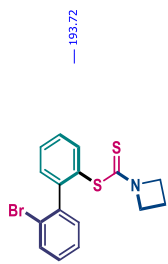

5b, 101 MHz, CDCl<sub>3</sub>

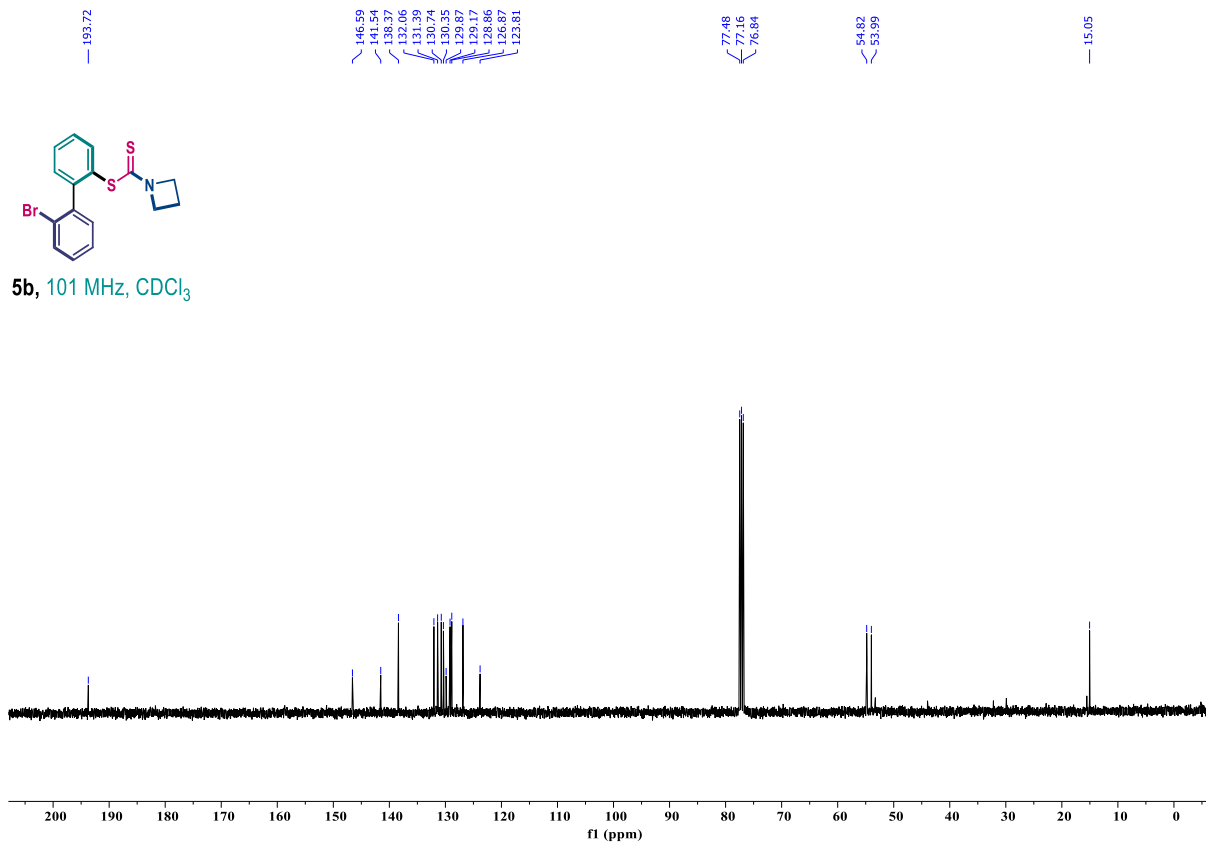

7.57  
7.55  
7.53  
7.51  
7.49  
7.48  
7.47  
7.45  
7.43  
7.42  
7.41  
7.40  
7.39  
7.38  
7.37  
7.36  
7.34  
7.34  
7.33  
7.32  
7.31  
7.30  
7.30  
7.28  
7.26  
7.24  
7.24  
7.23  
7.21  
7.20  
7.16  
7.15  
7.15  
7.13  
7.13  
7.11  
7.11  
7.09  
3.83  
3.73  
3.64

1.65  
1.65  
1.57  
1.56  
1.55  
1.53  
1.51  
1.49  
1.46  
1.44

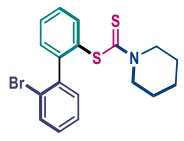

5c, 400 MHz, CDCl<sub>3</sub>

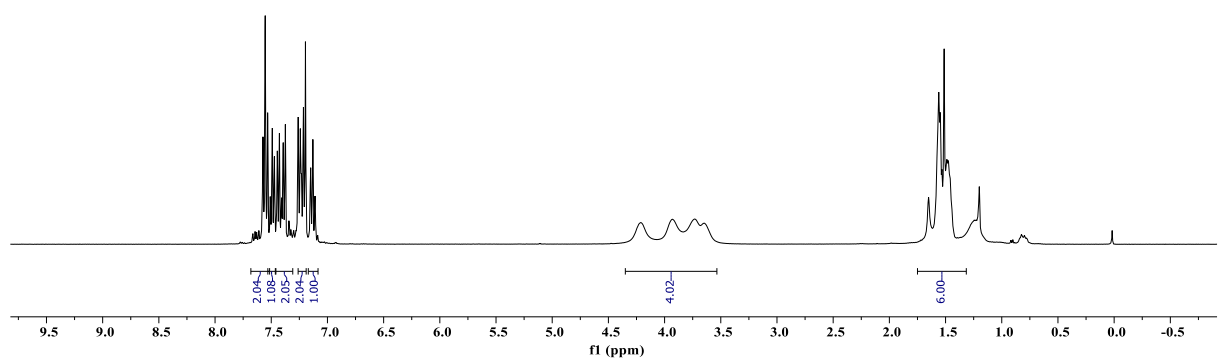

195.54

146.57  
141.72  
138.73  
131.96  
131.38  
131.23  
130.67  
130.34  
129.00  
128.76  
128.68  
128.82

77.48  
77.16  
76.84

53.18  
52.40

25.77  
25.63  
24.27

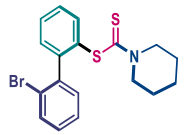

5c, 101 MHz, CDCl<sub>3</sub>

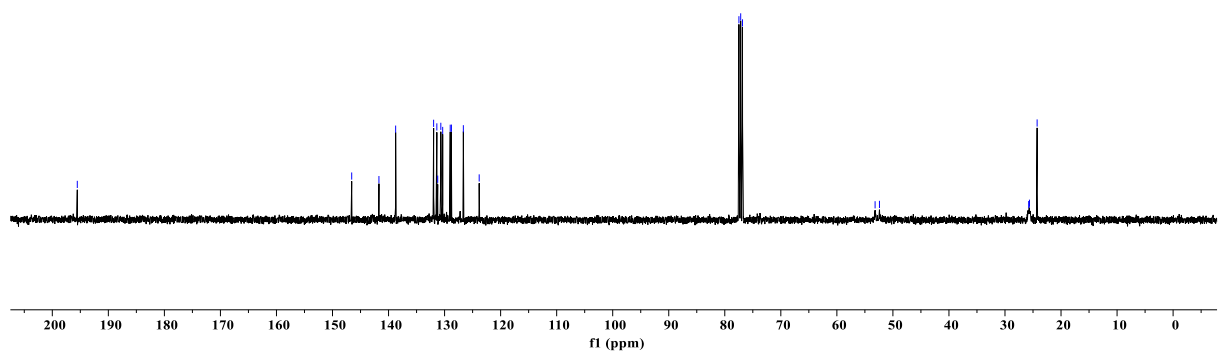

7.65  
7.63  
7.62  
7.61  
7.60  
7.59  
7.56  
7.55  
7.55  
7.54  
7.53  
7.51  
7.51  
7.50  
7.49  
7.48  
7.47  
7.45  
7.44  
7.43  
7.42  
7.41  
7.40  
7.40  
7.39  
7.38  
7.37  
7.34  
7.34  
7.33  
7.32  
7.30  
7.26  
7.24  
7.24  
7.22  
7.20  
7.19  
7.16  
7.14  
7.14  
7.12  
7.11  
7.11  
3.81  
3.71  
3.70  
3.68  
3.63  
3.62  
3.61  
3.59  
3.58  
3.56  
3.55  
3.54  
3.52  
3.49  
3.48  
3.38  
3.32  
3.31

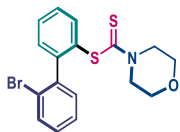

5d, 400 MHz, CDCl<sub>3</sub>

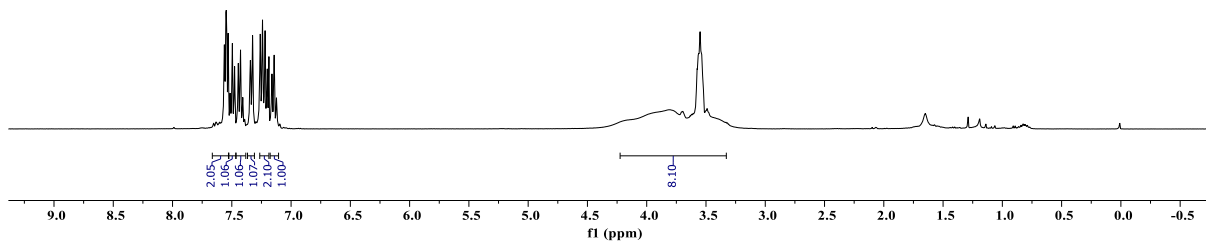

197.35

146.58  
141.54  
138.57  
133.03  
131.26  
130.77  
130.60  
130.57  
129.17  
128.90  
126.74  
125.80

77.48  
77.16  
76.84

66.25

51.52

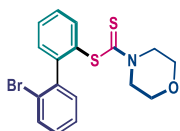

5d, 101 MHz, CDCl<sub>3</sub>

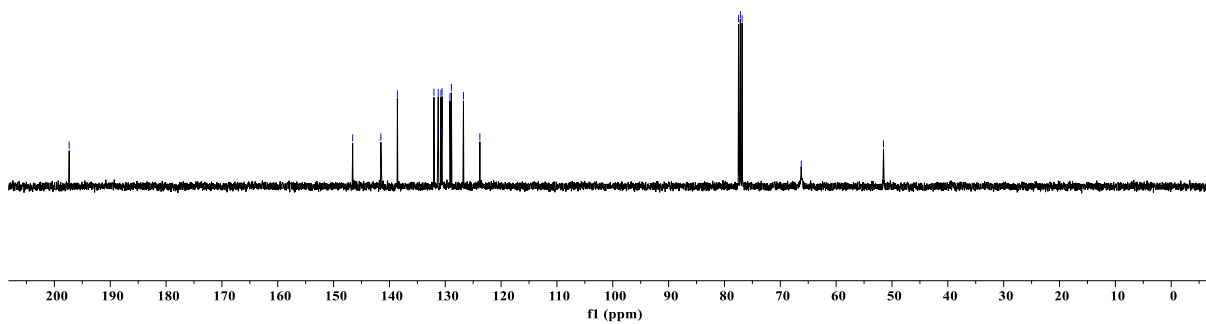

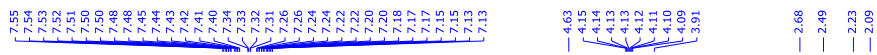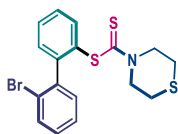

5e, 400 MHz, CDCl<sub>3</sub>

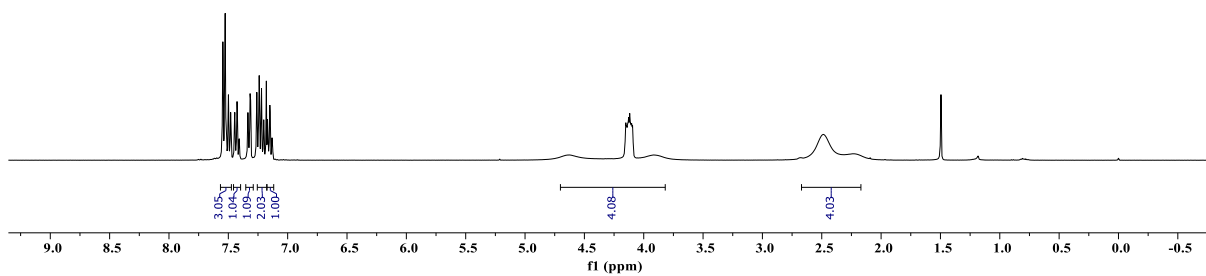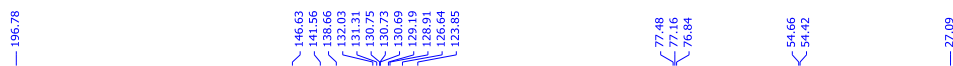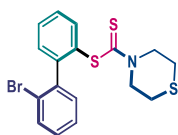

5e, 101 MHz, CDCl<sub>3</sub>

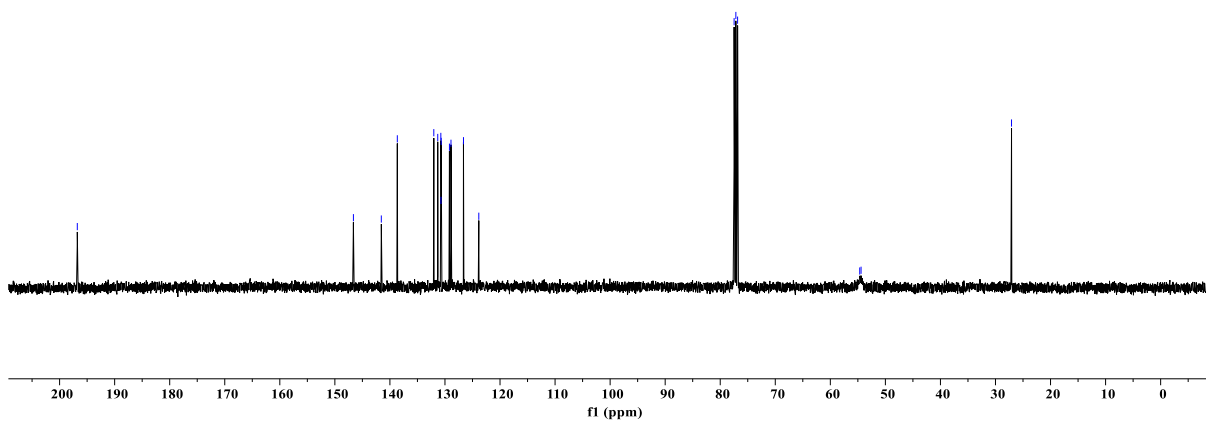

7.56  
7.56  
7.54  
7.52  
7.51  
7.49  
7.49  
7.47  
7.45  
7.44  
7.43  
7.43  
7.41  
7.38  
7.38  
7.36  
7.26  
7.24  
7.24  
7.21  
7.19  
7.17  
7.13  
7.13  
7.11  
7.11  
7.09  
7.09  
4.45  
4.44  
4.43  
4.22  
3.82  
3.80  
3.78  
3.74  
3.72  
3.72  
3.69  
3.69  
3.54  
3.53  
3.51  
3.51  
1.73  
1.72  
1.70  
1.70  
1.68  
1.67  
1.65  
1.58  
1.57  
1.57  
1.56  
1.52  
1.51  
1.50  
1.49  
1.48  
1.47  
1.46  
1.45  
1.44  
1.43  
1.42  
1.41  
1.39  
1.38  
1.37  
1.36  
1.35  
1.34  
1.33  
1.32  
1.31  
1.21  
1.20  
1.19

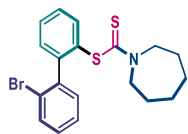

5f, 400 MHz, CDCl<sub>3</sub>

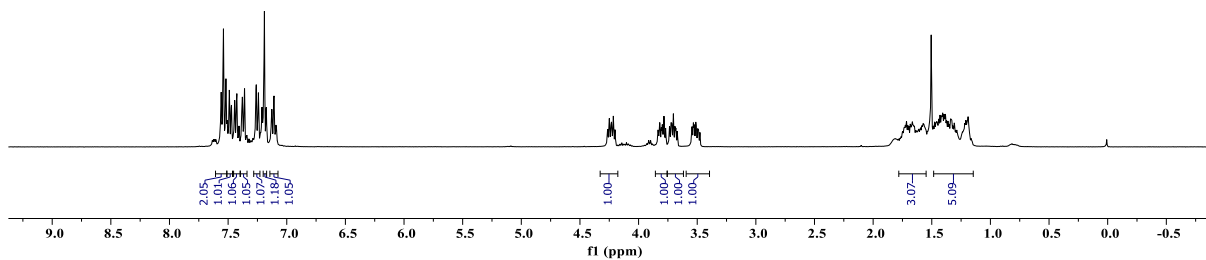

196.13

146.73  
141.75  
136.89  
131.92  
131.41  
131.07  
130.68  
130.44  
128.96  
126.66  
123.81

77.48  
77.16  
76.84

55.84  
53.44

27.15  
26.40  
26.20

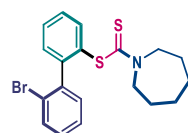

5f, 101 MHz, CDCl<sub>3</sub>

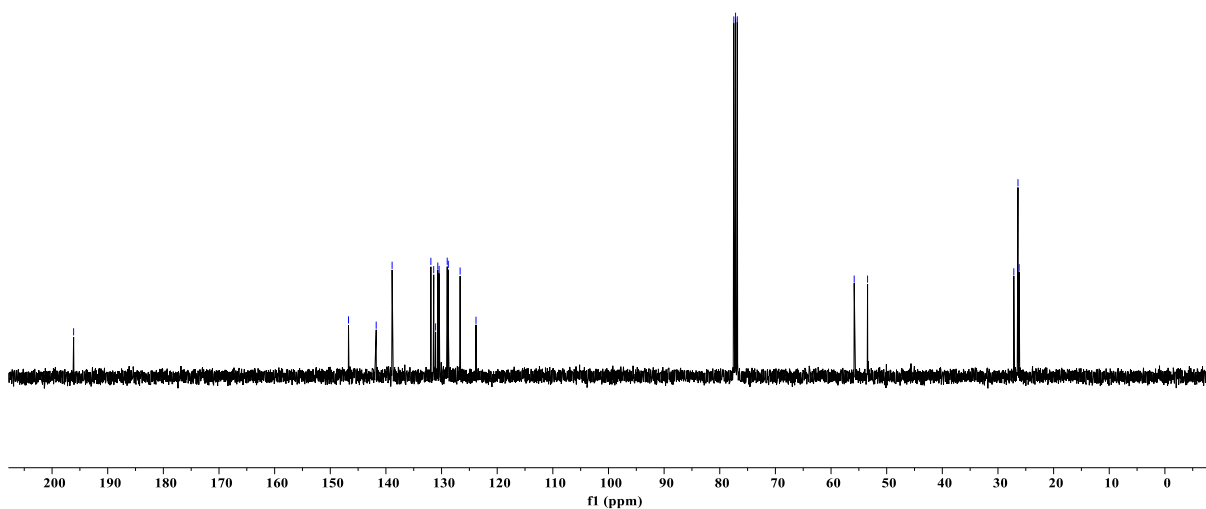

7.63  
7.61  
7.59  
7.58  
7.56  
7.55  
7.53  
7.52  
7.51  
7.50  
7.49  
7.48  
7.47  
7.46  
7.45  
7.44  
7.43  
7.42  
7.41  
7.40  
7.39  
7.38  
7.37  
7.36  
7.35  
7.34  
7.33  
7.32  
7.30  
7.30  
7.29  
7.28  
7.27  
7.26  
7.25  
7.23  
7.23  
7.21  
7.21  
7.20  
7.19  
7.18  
7.17  
7.15  
7.15  
7.14  
7.13  
7.12  
7.11  
7.10  
7.09  
7.08  
7.07  
7.06  
7.05  
7.04  
7.03  
7.02  
7.01  
7.00  
6.99  
6.98  
6.97  
6.96  
6.95  
6.94  
6.93  
6.92  
6.91  
6.90  
6.89  
6.88  
6.87  
6.86  
6.85  
6.84  
6.83  
6.82  
6.81  
6.80  
6.79  
6.78  
6.77  
6.76  
6.75  
6.74  
6.73  
6.72  
6.71  
6.70  
6.69  
6.68  
6.67  
6.66  
6.65  
6.64  
6.63  
6.62  
6.61  
6.60  
6.59  
6.58  
6.57  
6.56  
6.55  
6.54  
6.53  
6.52  
6.51  
6.50  
6.49  
6.48  
6.47  
6.46  
6.45  
6.44  
6.43  
6.42  
6.41  
6.40  
6.39  
6.38  
6.37  
6.36  
6.35  
6.34  
6.33  
6.32  
6.31  
6.30  
6.29  
6.28  
6.27  
6.26  
6.25  
6.24  
6.23  
6.22  
6.21  
6.20  
6.19  
6.18  
6.17  
6.16  
6.15  
6.14  
6.13  
6.12  
6.11  
6.10  
6.09  
6.08  
6.07  
6.06  
6.05  
6.04  
6.03  
6.02  
6.01  
6.00  
5.99  
5.98  
5.97  
5.96  
5.95  
5.94  
5.93  
5.92  
5.91  
5.90  
5.89  
5.88  
5.87  
5.86  
5.85  
5.84  
5.83  
5.82  
5.81  
5.80  
5.79  
5.78  
5.77  
5.76  
5.75  
5.74  
5.73  
5.72  
5.71  
5.70  
5.69  
5.68  
5.67  
5.66  
5.65  
5.64  
5.63  
5.62  
5.61  
5.60  
5.59  
5.58  
5.57  
5.56  
5.55  
5.54  
5.53  
5.52  
5.51  
5.50  
5.49  
5.48  
5.47  
5.46  
5.45  
5.44  
5.43  
5.42  
5.41  
5.40  
5.39  
5.38  
5.37  
5.36  
5.35  
5.34  
5.33  
5.32  
5.31  
5.30  
5.29  
5.28  
5.27  
5.26  
5.25  
5.24  
5.23  
5.22  
5.21  
5.20  
5.19  
5.18  
5.17  
5.16  
5.15  
5.14  
5.13  
5.12  
5.11  
5.10  
5.09  
5.08  
5.07  
5.06  
5.05  
5.04  
5.03  
5.02  
5.01  
5.00  
4.99  
4.98  
4.97  
4.96  
4.95  
4.94  
4.93  
4.92  
4.91  
4.90  
4.89  
4.88  
4.87  
4.86  
4.85  
4.84  
4.83  
4.82  
4.81  
4.80  
4.79  
4.78  
4.77  
4.76  
4.75  
4.74  
4.73  
4.72  
4.71  
4.70  
4.69  
4.68  
4.67  
4.66  
4.65  
4.64  
4.63  
4.62  
4.61  
4.60  
4.59  
4.58  
4.57  
4.56  
4.55  
4.54  
4.53  
4.52  
4.51  
4.50  
4.49  
4.48  
4.47  
4.46  
4.45  
4.44  
4.43  
4.42  
4.41  
4.40  
4.39  
4.38  
4.37  
4.36  
4.35  
4.34  
4.33  
4.32  
4.31  
4.30  
4.29  
4.28  
4.27  
4.26  
4.25  
4.24  
4.23  
4.22  
4.21  
4.20  
4.19  
4.18  
4.17  
4.16  
4.15  
4.14  
4.13  
4.12  
4.11  
4.10  
4.09  
4.08  
4.07  
4.06  
4.05  
4.04  
4.03  
4.02  
4.01  
4.00  
3.99  
3.98  
3.97  
3.96  
3.95  
3.94  
3.93  
3.92  
3.91  
3.90  
3.89  
3.88  
3.87  
3.86  
3.85  
3.84  
3.83  
3.82  
3.81  
3.80  
3.79  
3.78  
3.77  
3.76  
3.75  
3.74  
3.73  
3.72  
3.71  
3.70  
3.69  
3.68  
3.67  
3.66  
3.65  
3.64  
3.63  
3.62  
3.61  
3.60  
3.59  
3.58  
3.57  
3.56  
3.55  
3.54  
3.53  
3.52  
3.51  
3.50  
3.49  
3.48  
3.47  
3.46  
3.45  
3.44  
3.43  
3.42  
3.41  
3.40  
3.39  
3.38  
3.37  
3.36  
3.35  
3.34  
3.33  
3.32  
3.31  
3.30  
3.29  
3.28  
3.27  
3.26  
3.25  
3.24  
3.23  
3.22  
3.21  
3.20  
3.19  
3.18  
3.17  
3.16  
3.15  
3.14  
3.13  
3.12  
3.11  
3.10  
3.09  
3.08  
3.07  
3.06  
3.05  
3.04  
3.03  
3.02  
3.01  
3.00  
2.99  
2.98  
2.97  
2.96  
2.95  
2.94  
2.93  
2.92  
2.91  
2.90  
2.89  
2.88  
2.87  
2.86  
2.85  
2.84  
2.83  
2.82  
2.81  
2.80  
2.79  
2.78  
2.77  
2.76  
2.75  
2.74  
2.73  
2.72  
2.71  
2.70  
2.69  
2.68  
2.67  
2.66  
2.65  
2.64  
2.63  
2.62  
2.61  
2.60  
2.59  
2.58  
2.57  
2.56  
2.55  
2.54  
2.53  
2.52  
2.51  
2.50  
2.49  
2.48  
2.47  
2.46  
2.45  
2.44  
2.43  
2.42  
2.41  
2.40  
2.39  
2.38  
2.37  
2.36  
2.35  
2.34  
2.33  
2.32  
2.31  
2.30  
2.29  
2.28  
2.27  
2.26  
2.25  
2.24  
2.23  
2.22  
2.21  
2.20  
2.19  
2.18  
2.17  
2.16  
2.15  
2.14  
2.13  
2.12  
2.11  
2.10  
2.09  
2.08  
2.07  
2.06  
2.05  
2.04  
2.03  
2.02  
2.01  
2.00  
1.99  
1.98  
1.97  
1.96  
1.95  
1.94  
1.93  
1.92  
1.91  
1.90  
1.89  
1.88  
1.87  
1.86  
1.85  
1.84  
1.83  
1.82  
1.81  
1.80  
1.79  
1.78

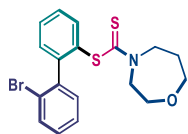

**5g**, 400 MHz, CDCl<sub>3</sub>  
(1.1:1.0 ratio of rotamer)

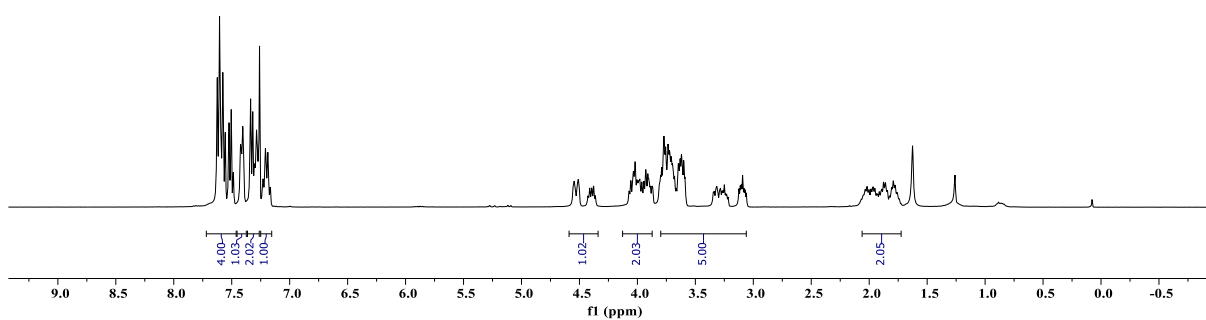

197.39  
196.82

146.74  
146.72  
141.67  
141.64  
138.79  
137.76  
137.04  
133.94  
133.48  
133.35  
130.76  
130.71  
130.68  
129.18  
129.11  
128.99  
128.70  
123.86

77.48  
77.16  
76.84  
70.10  
69.81  
69.56  
69.33

58.58  
56.37  
53.68  
51.33

27.77  
26.98

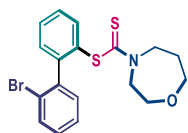

**5g**, 101 MHz, CDCl<sub>3</sub>  
(1.1:1.0 ratio of rotamer)

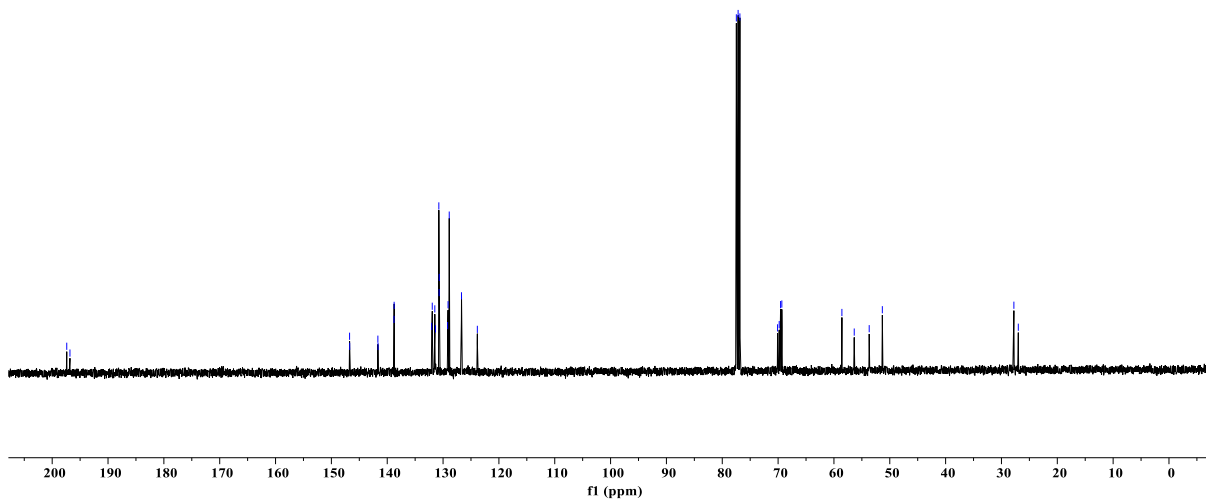

7.62  
7.60  
7.59  
7.58  
7.56  
7.54  
7.52  
7.51  
7.50  
7.49  
7.48  
7.47  
7.43  
7.42  
7.34  
7.33  
7.32  
7.31  
7.28  
7.26  
7.24  
7.19  
7.18  
7.17  
7.16  
7.15  
4.28  
4.28  
4.26  
4.26  
4.25  
4.24  
4.24  
3.89  
3.89  
3.87  
3.86  
3.85  
3.73  
3.72  
3.71  
3.71  
3.56  
3.55  
3.54  
3.53  
1.91  
1.90  
1.89  
1.88  
1.77  
1.76  
1.76  
1.75  
1.74  
1.74  
1.72  
1.71  
1.70  
1.69  
1.68  
1.67  
1.65  
1.64  
1.63  
1.62  
1.61  
1.57  
1.56  
1.43  
1.42  
1.41  
1.41  
1.40  
1.38  
1.37  
1.37  
1.36  
1.35  
1.34  
1.33  
1.26  
1.24  
1.23

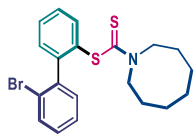

5h, 400 MHz, CDCl<sub>3</sub>

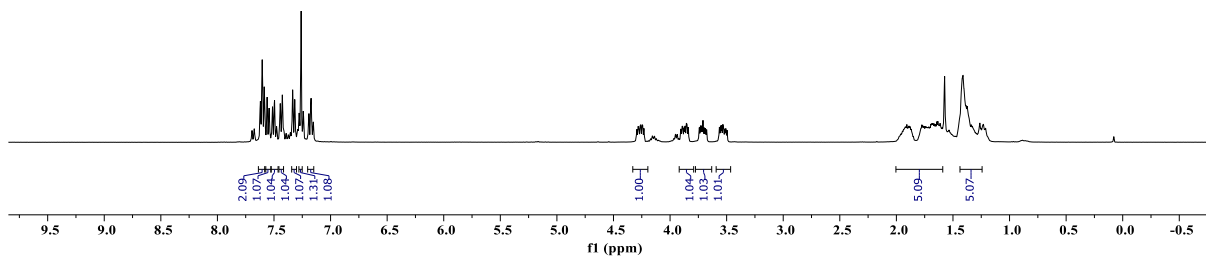

196.09

146.77  
141.74  
138.97  
131.90  
131.43  
131.03  
130.68  
130.44  
128.99  
128.77  
128.74  
123.79

77.48  
77.06  
76.84

56.64  
54.25

26.76  
26.29  
25.94  
25.31  
25.23

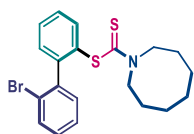

5h, 101 MHz, CDCl<sub>3</sub>

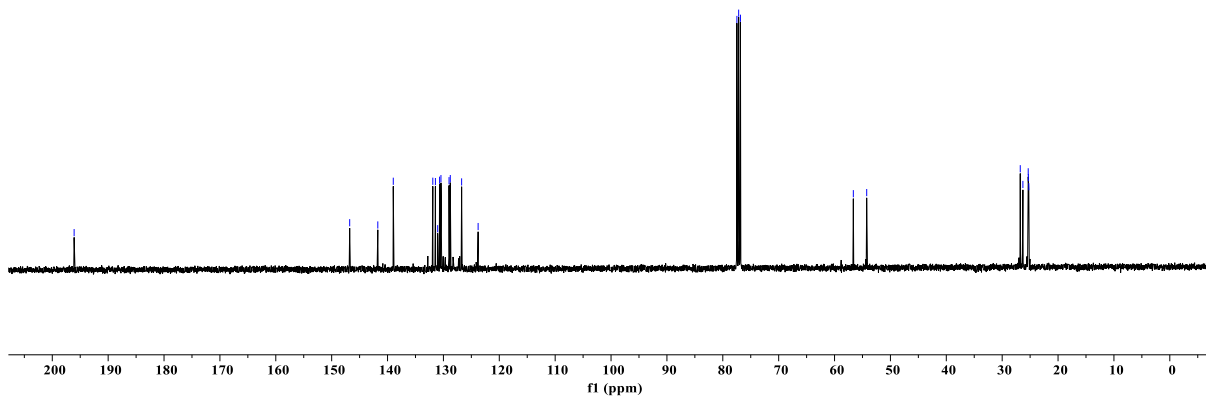

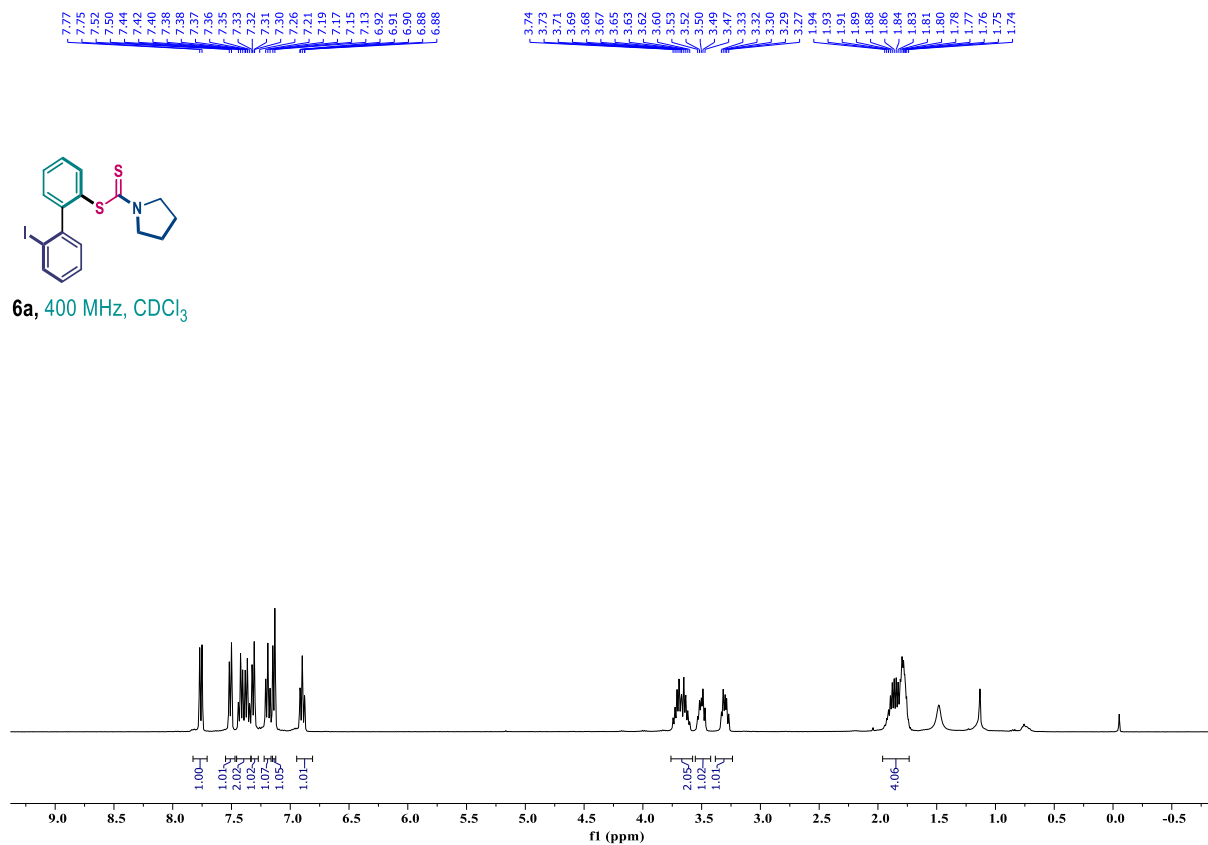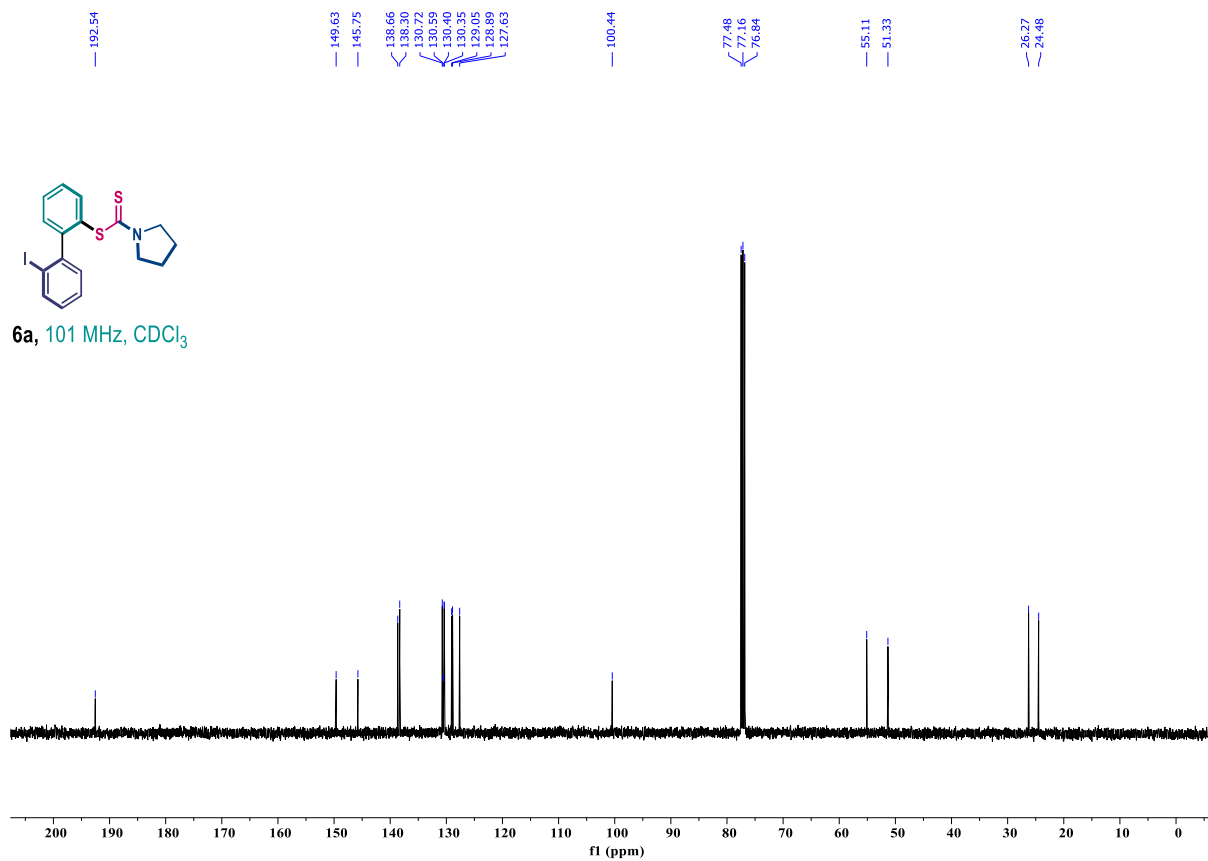



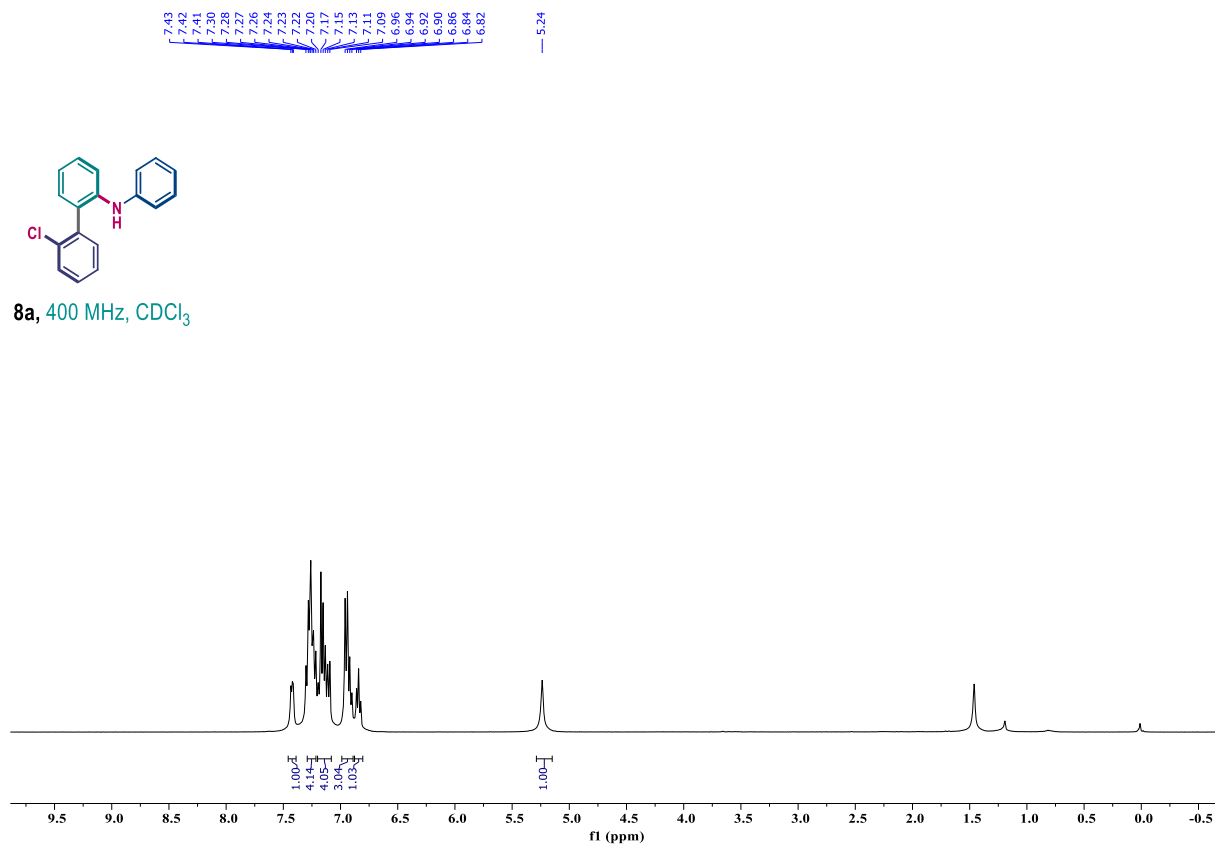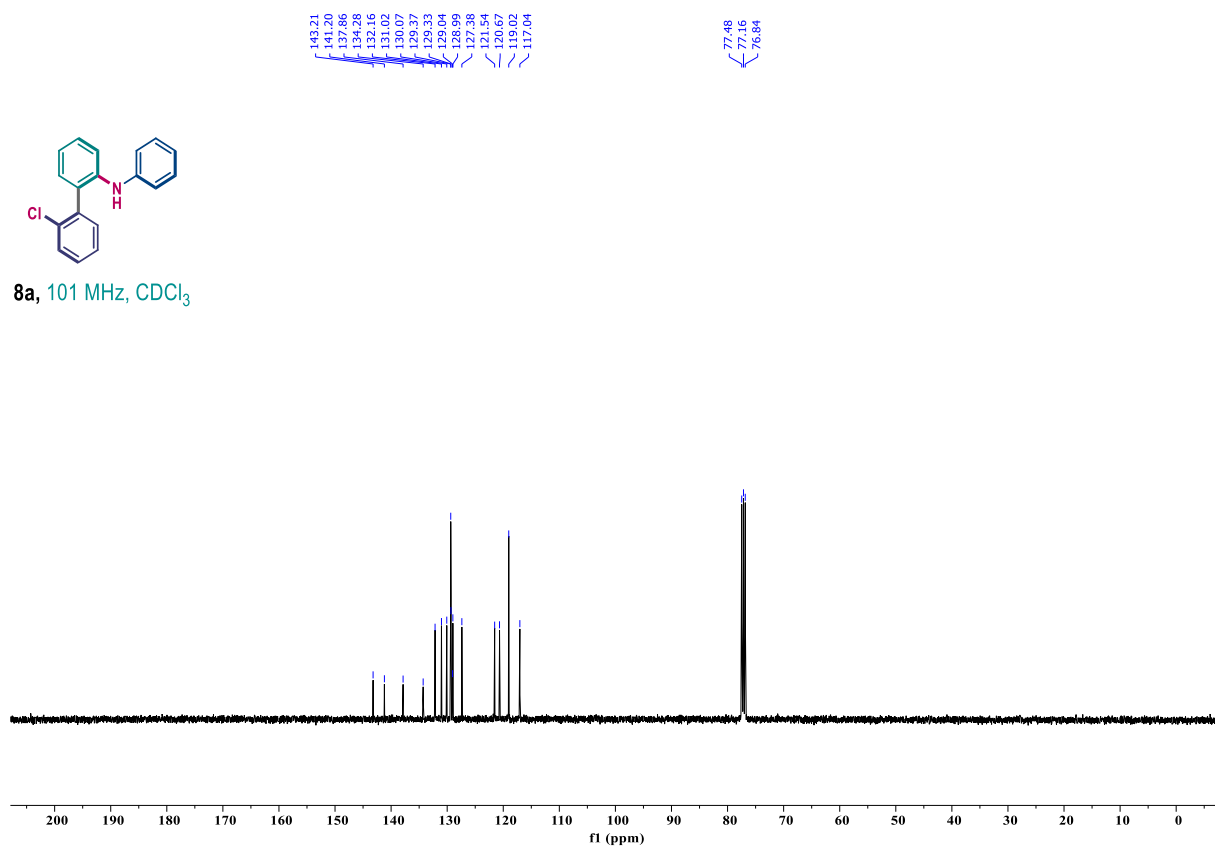

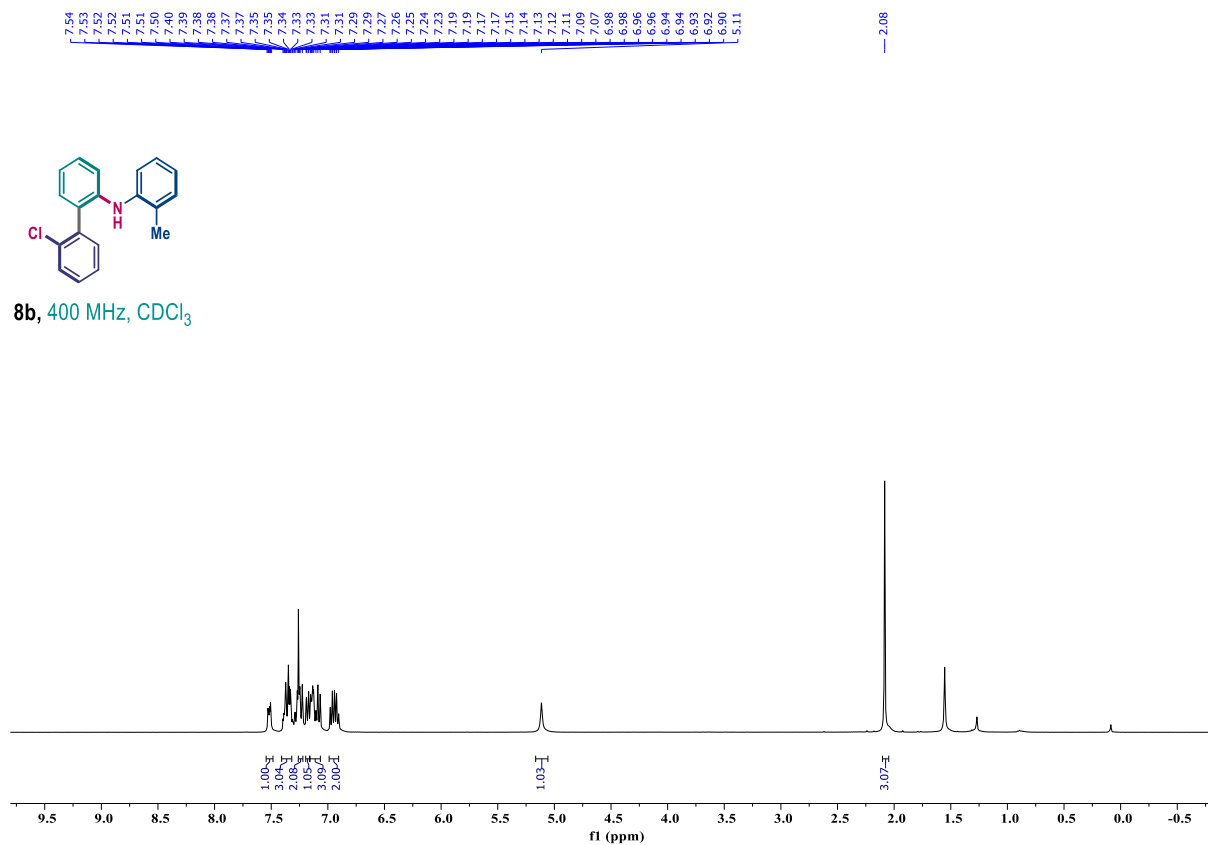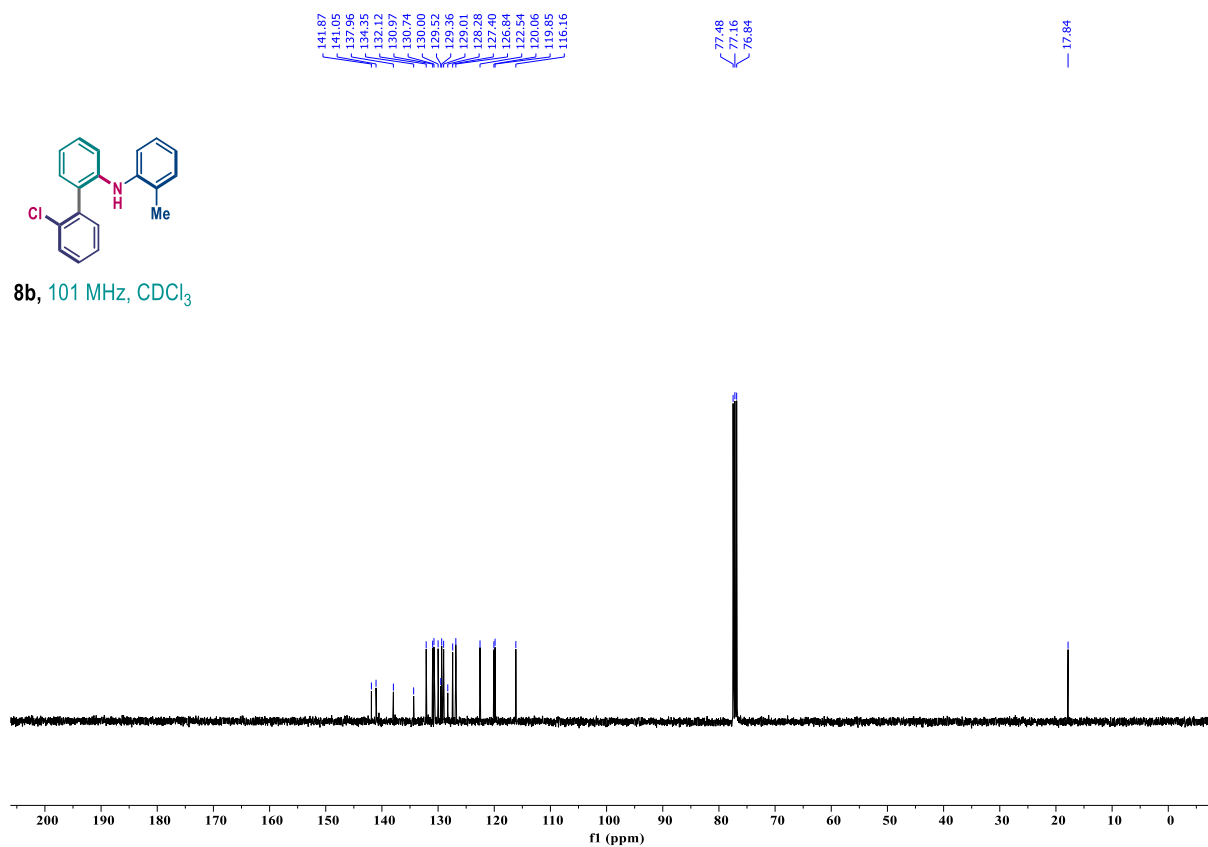

7.52  
7.51  
7.51  
7.50  
7.49  
7.47  
7.37  
7.36  
7.36  
7.35  
7.35  
7.33  
7.33  
7.32  
7.31  
7.30  
7.26  
7.23  
7.23  
7.21  
7.21  
7.05  
7.03  
6.88  
6.87  
6.86  
6.85  
6.84  
6.84  
6.83  
5.81

3.73

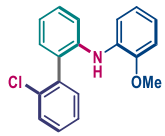

8c, 400 MHz, CDCl<sub>3</sub>

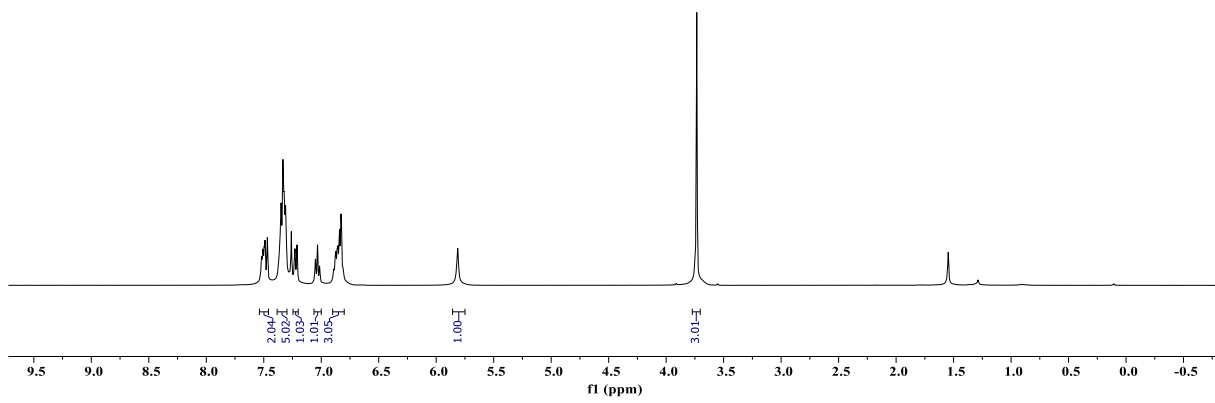

148.99  
140.79  
138.04  
134.30  
133.23  
132.06  
130.11  
130.11  
129.87  
129.13  
128.90  
127.13  
120.92  
120.33  
117.95  
115.69  
110.96

77.48  
77.16  
76.84

55.83

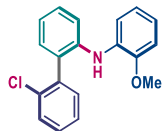

8c, 101 MHz, CDCl<sub>3</sub>

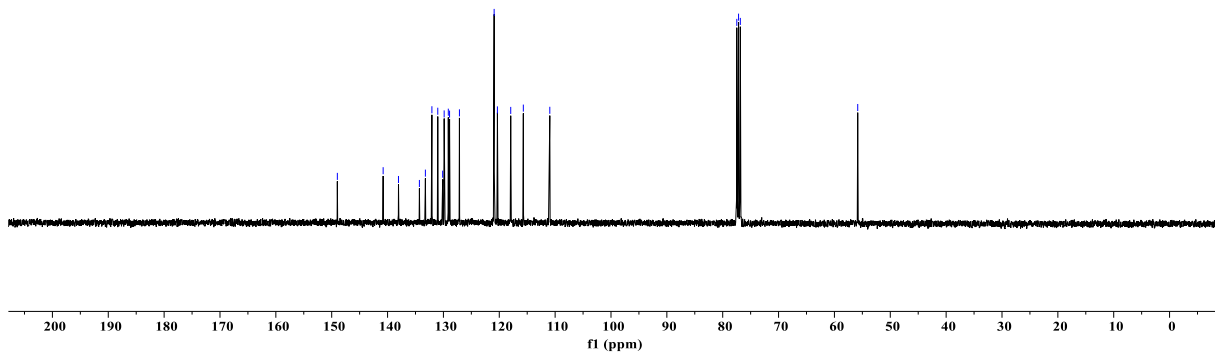

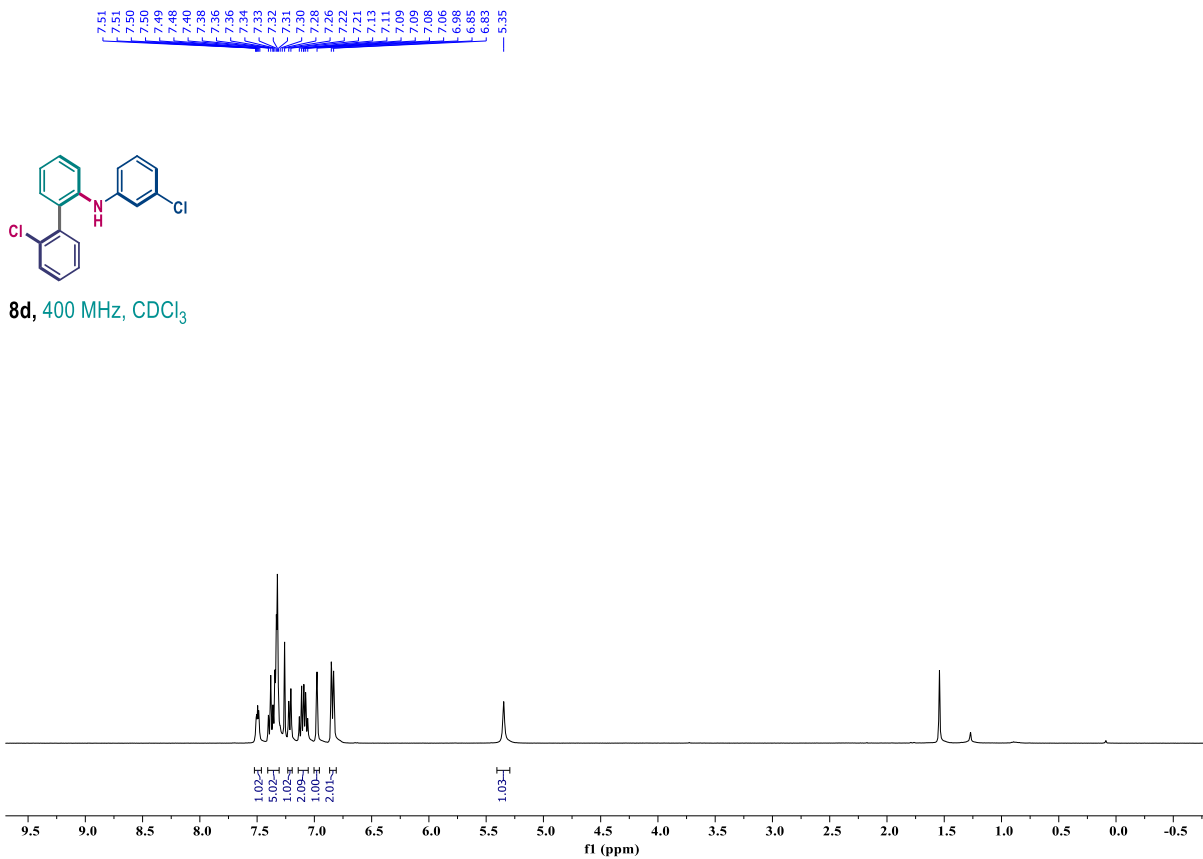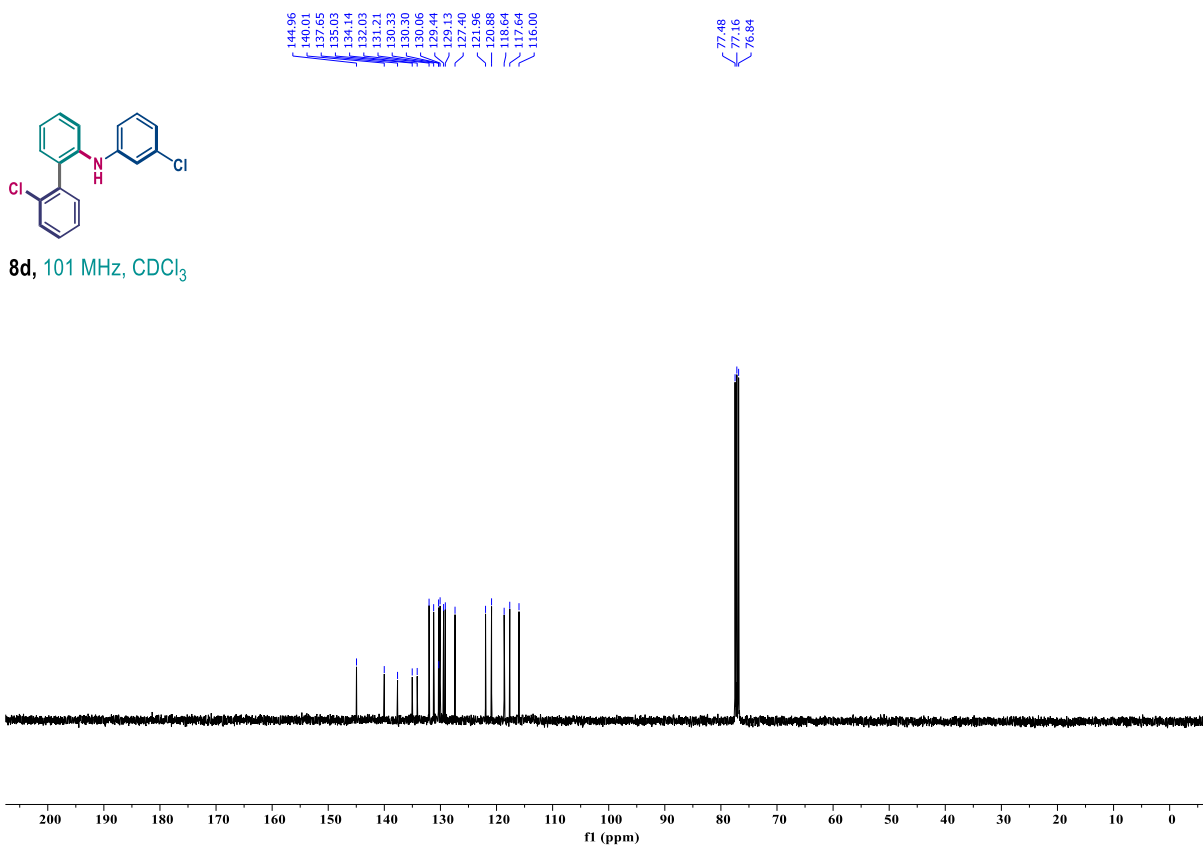

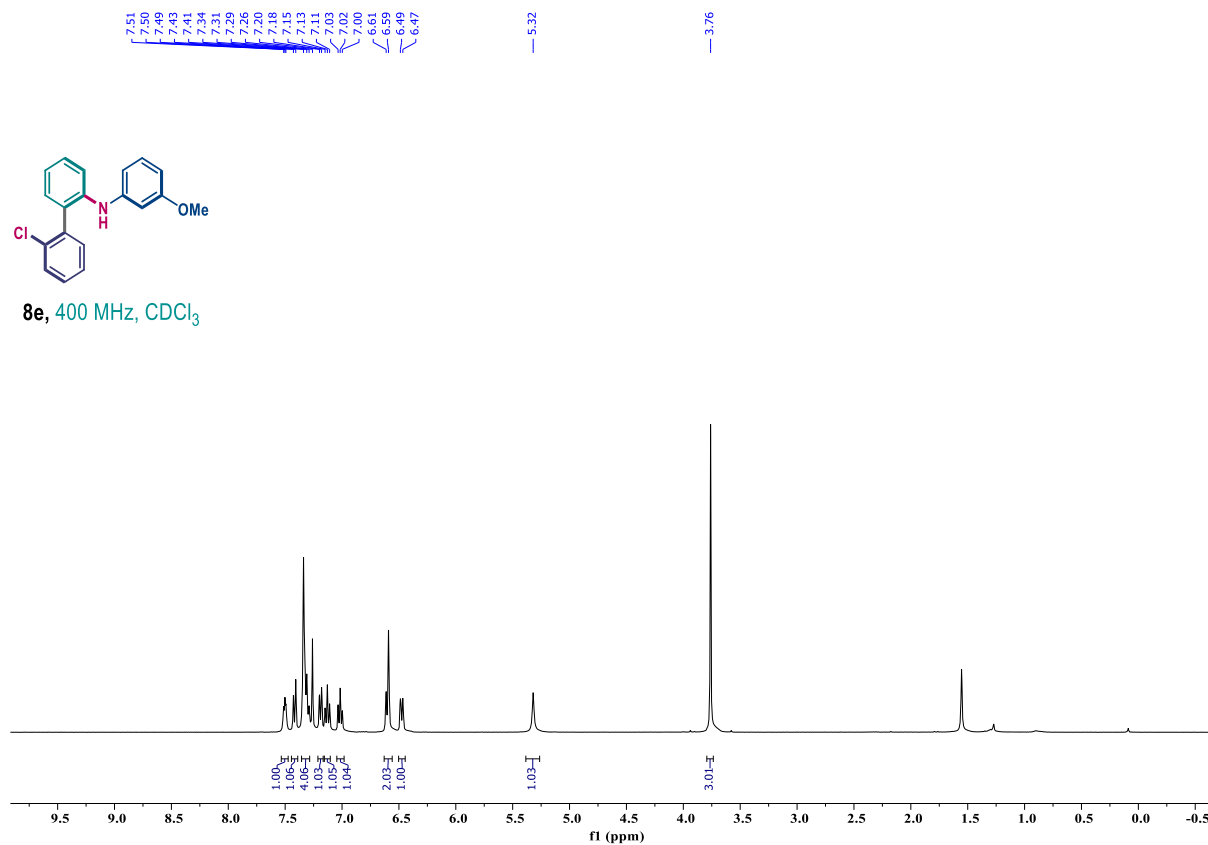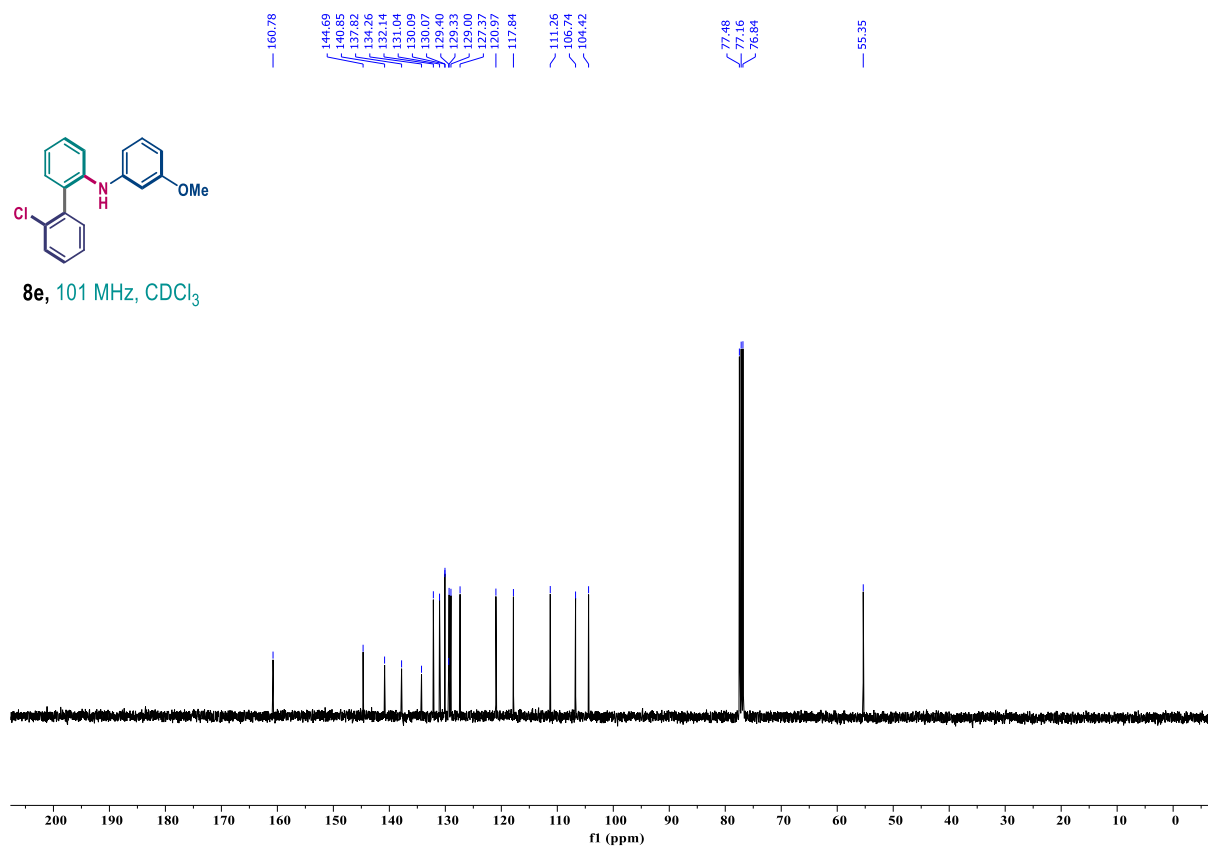

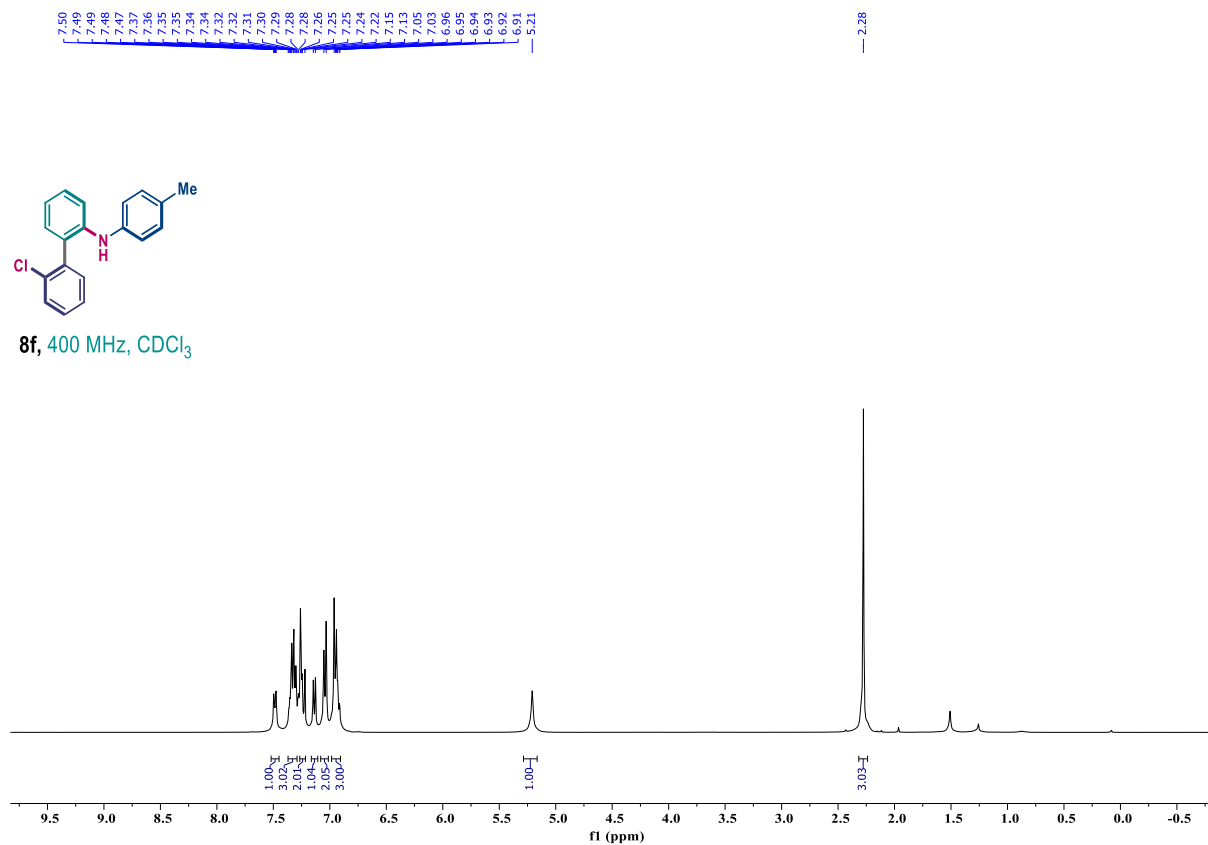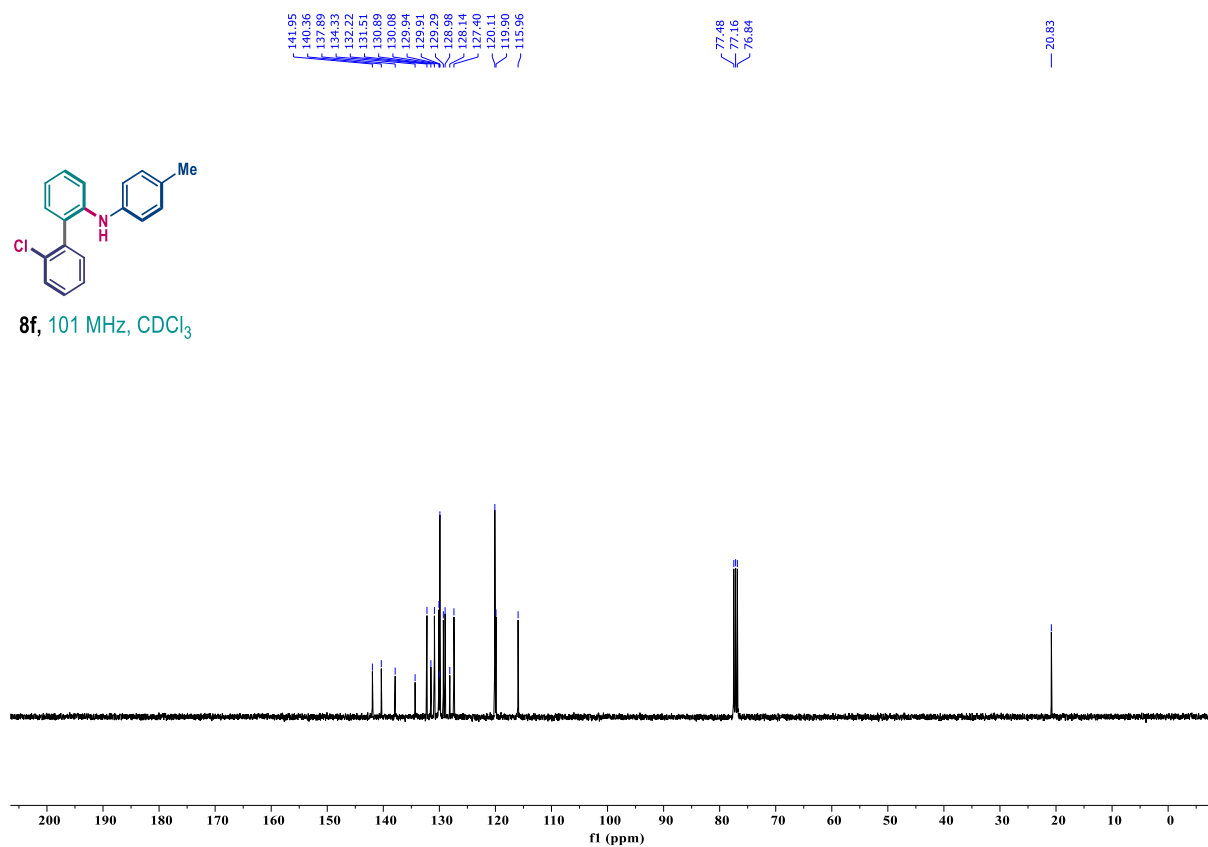

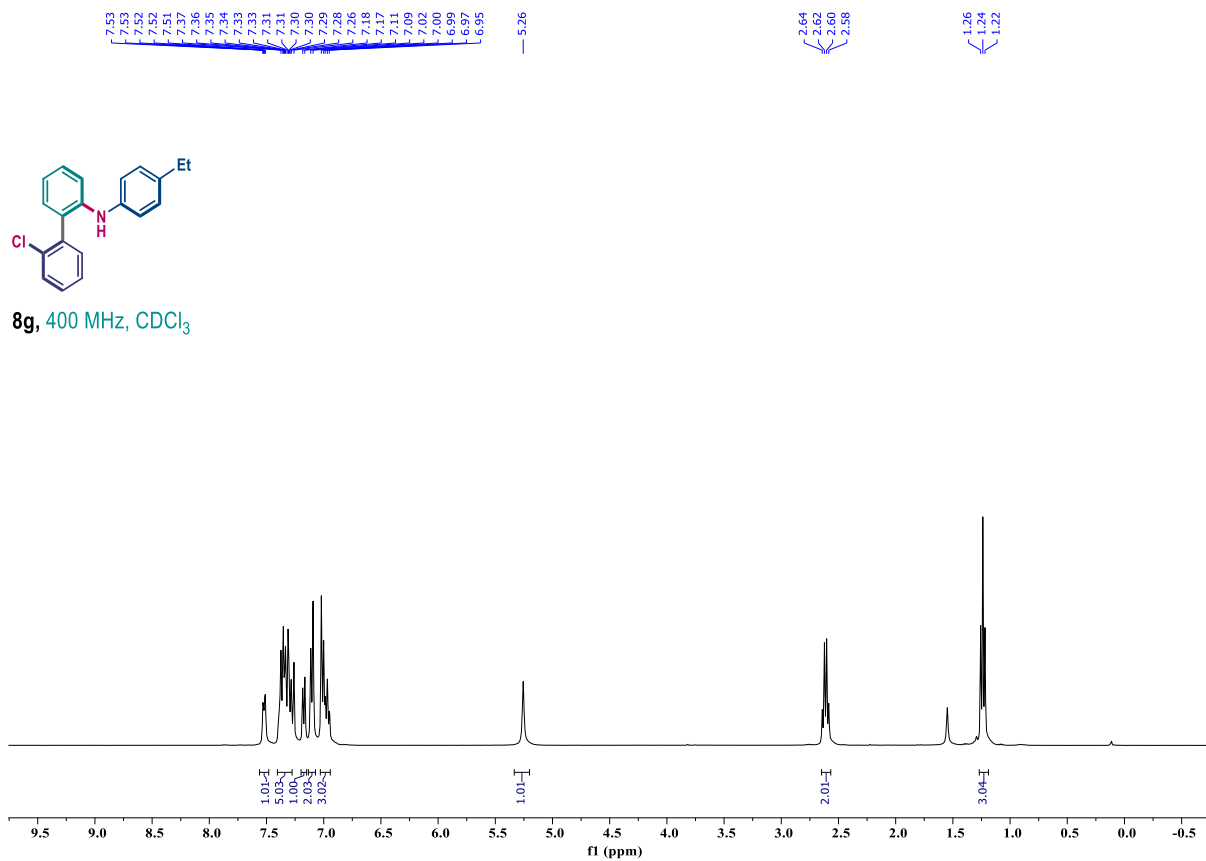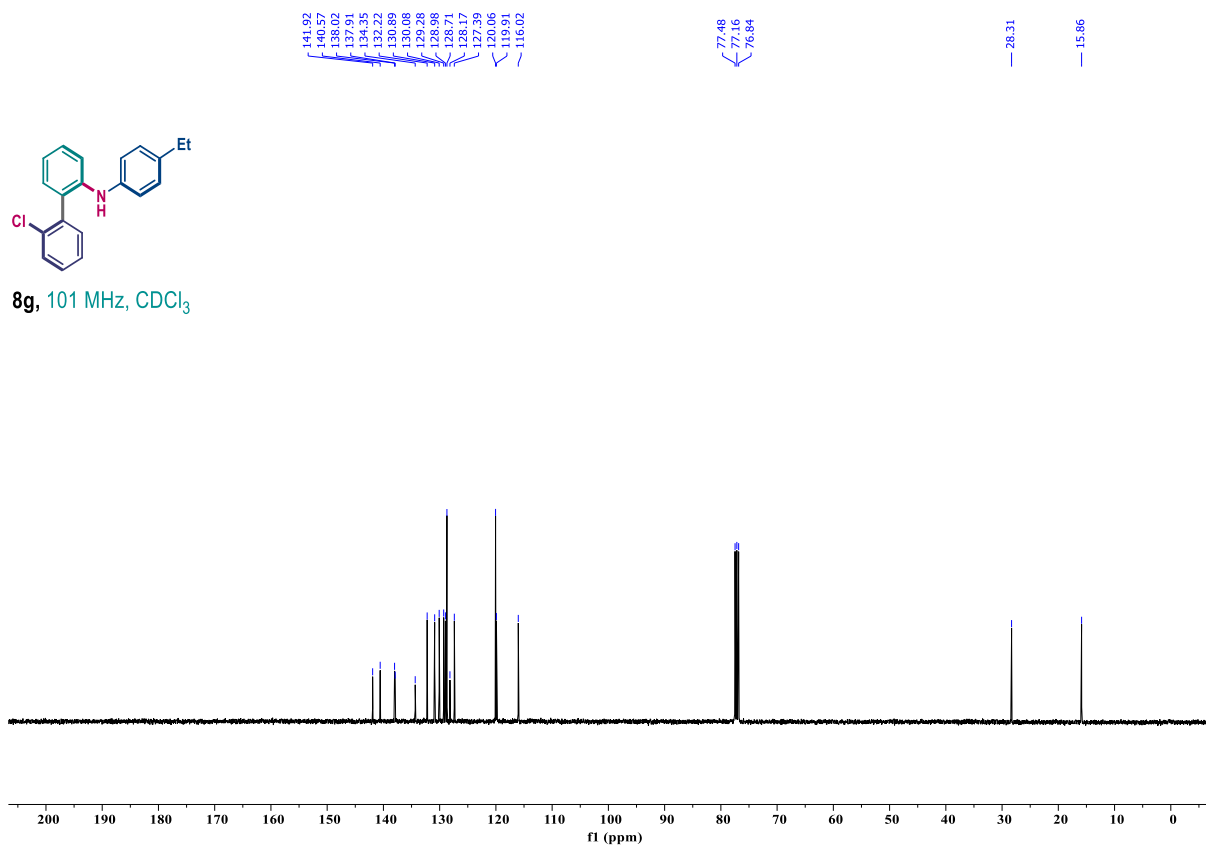

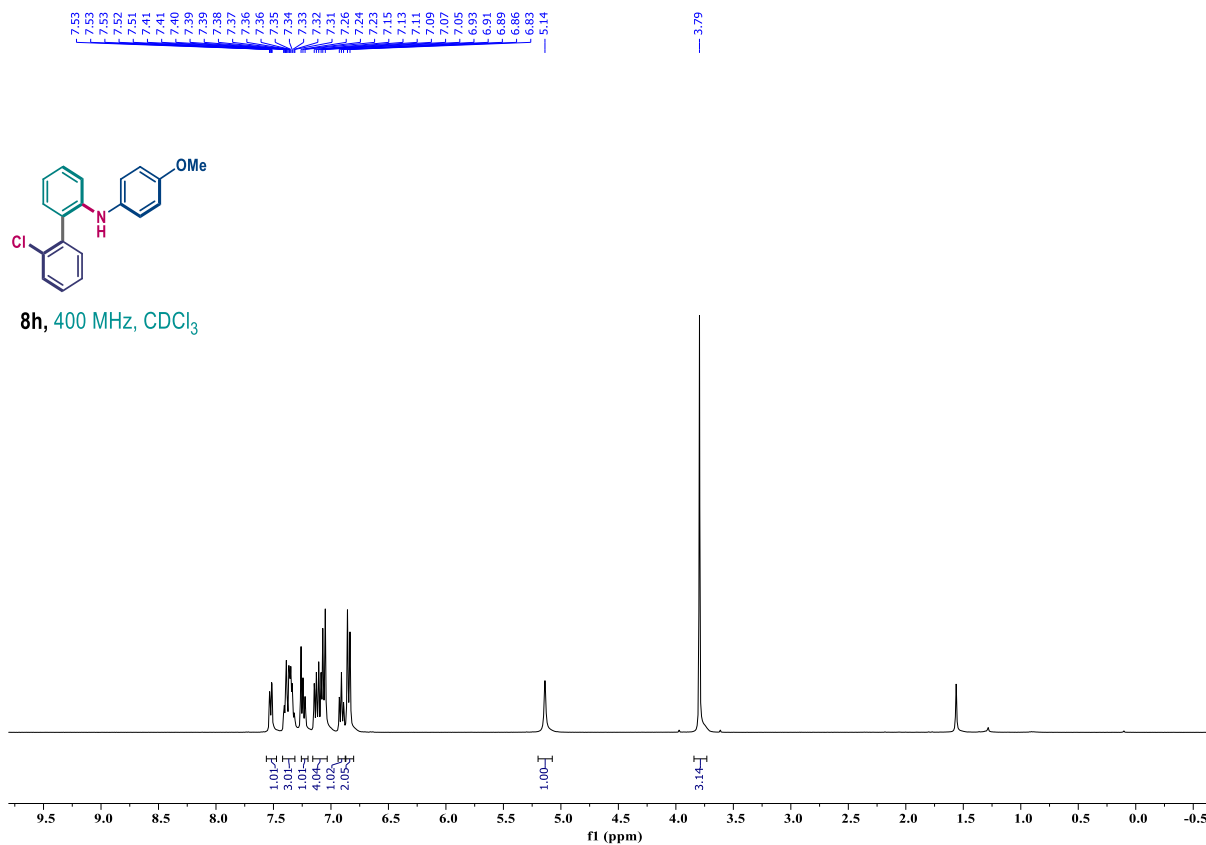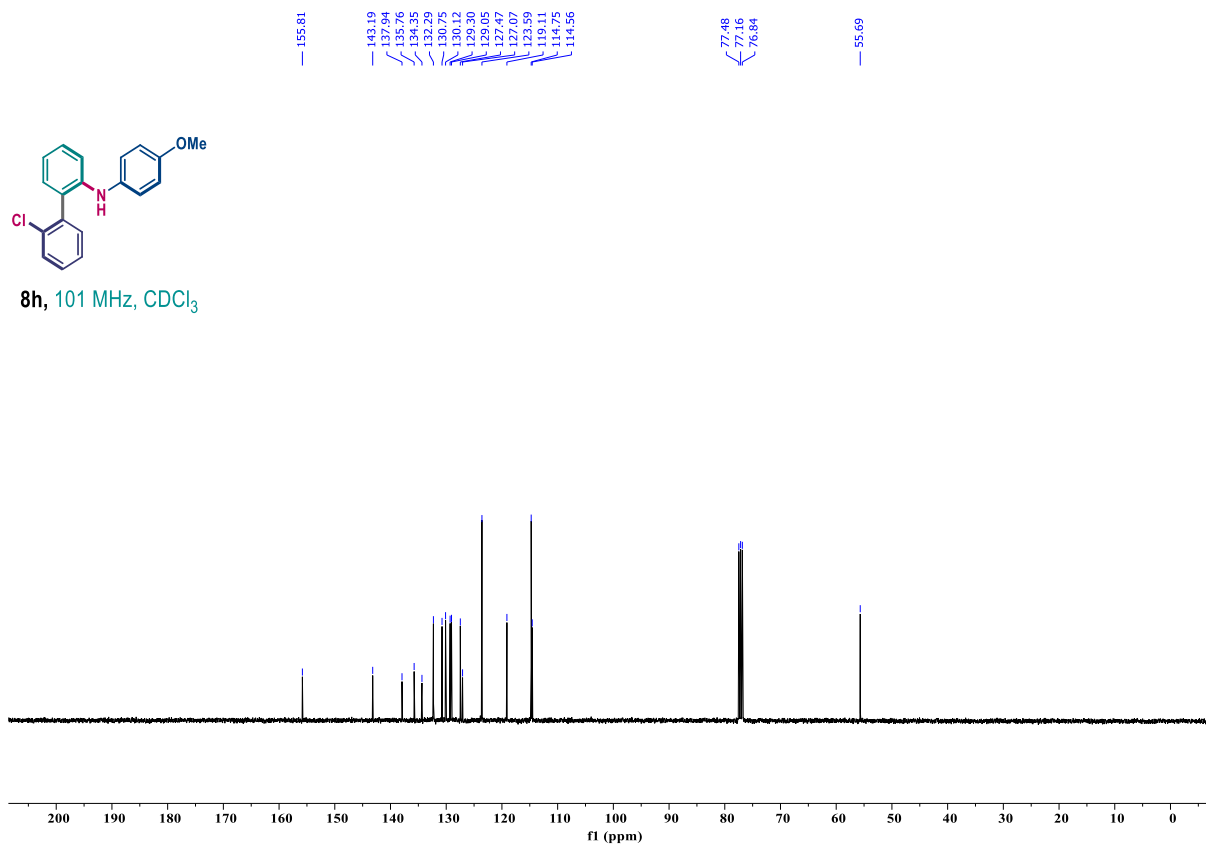



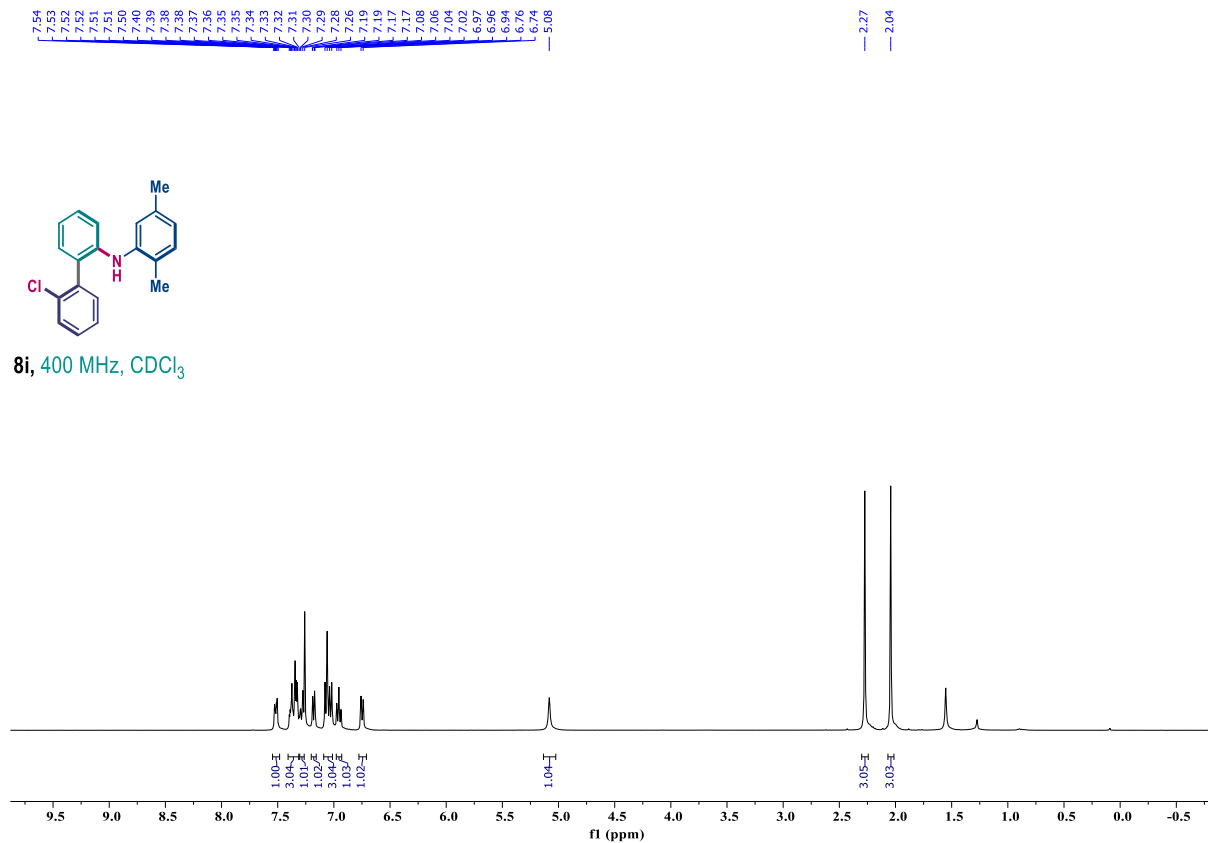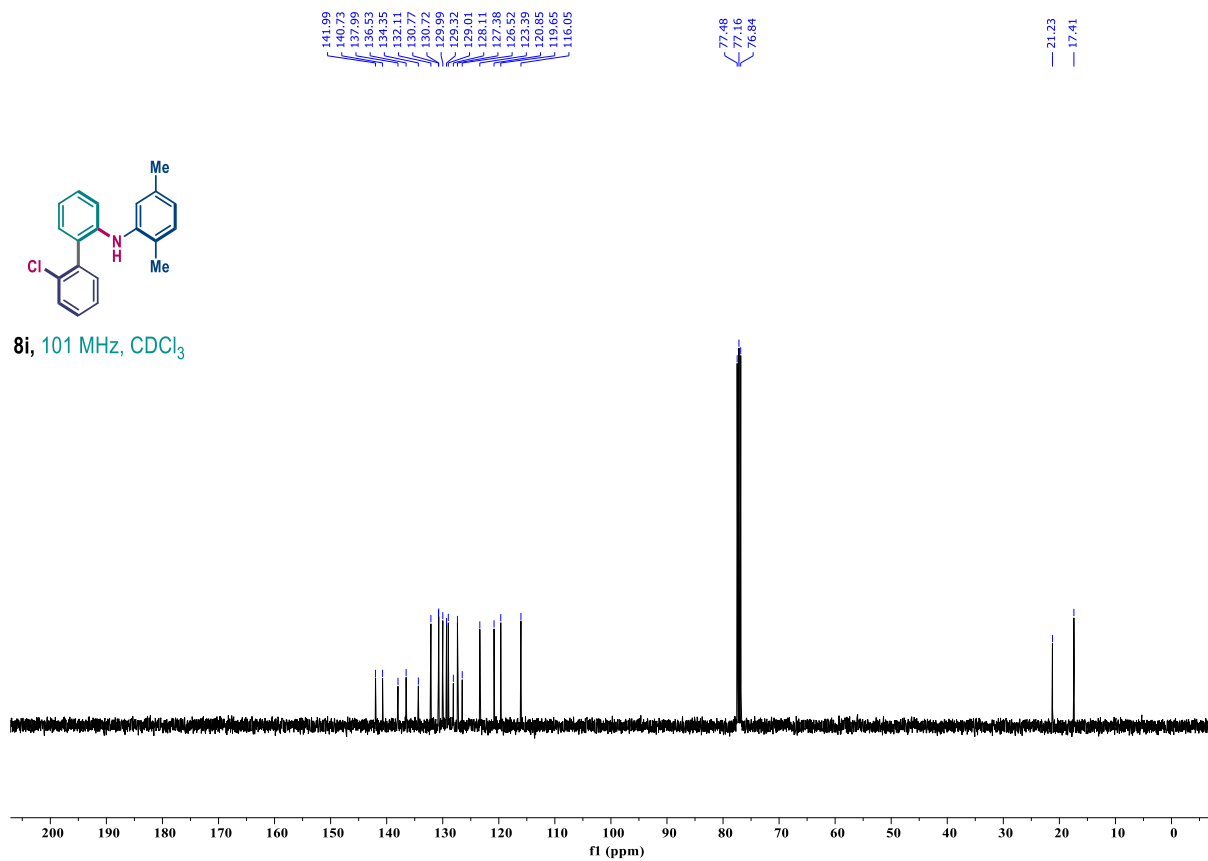

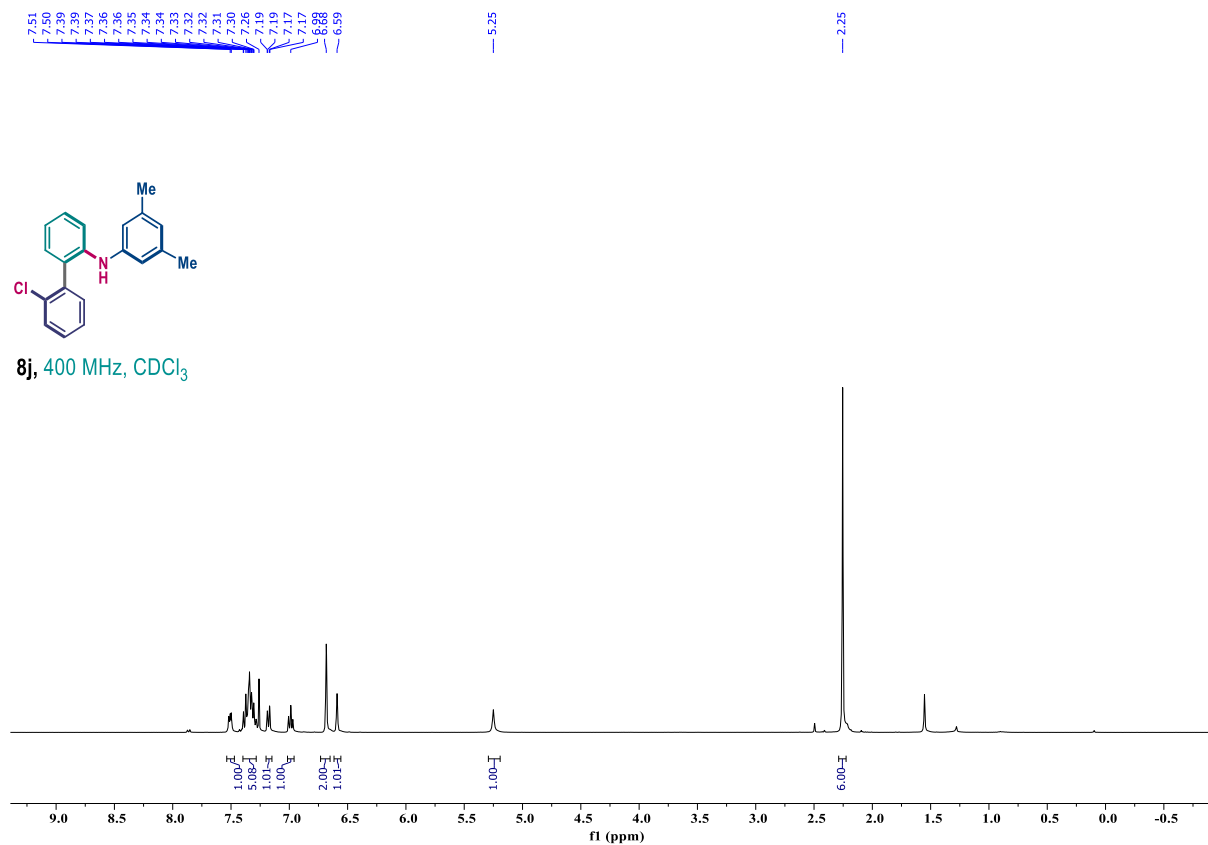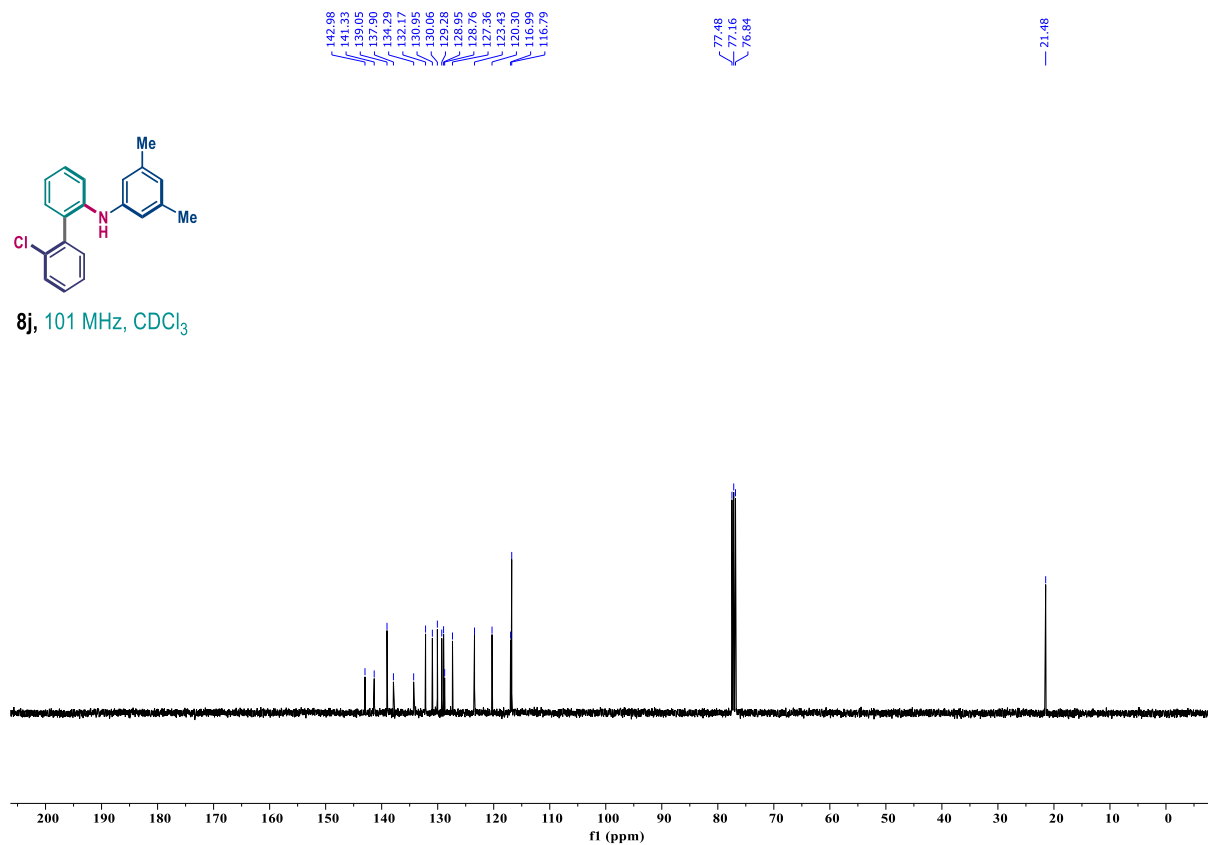

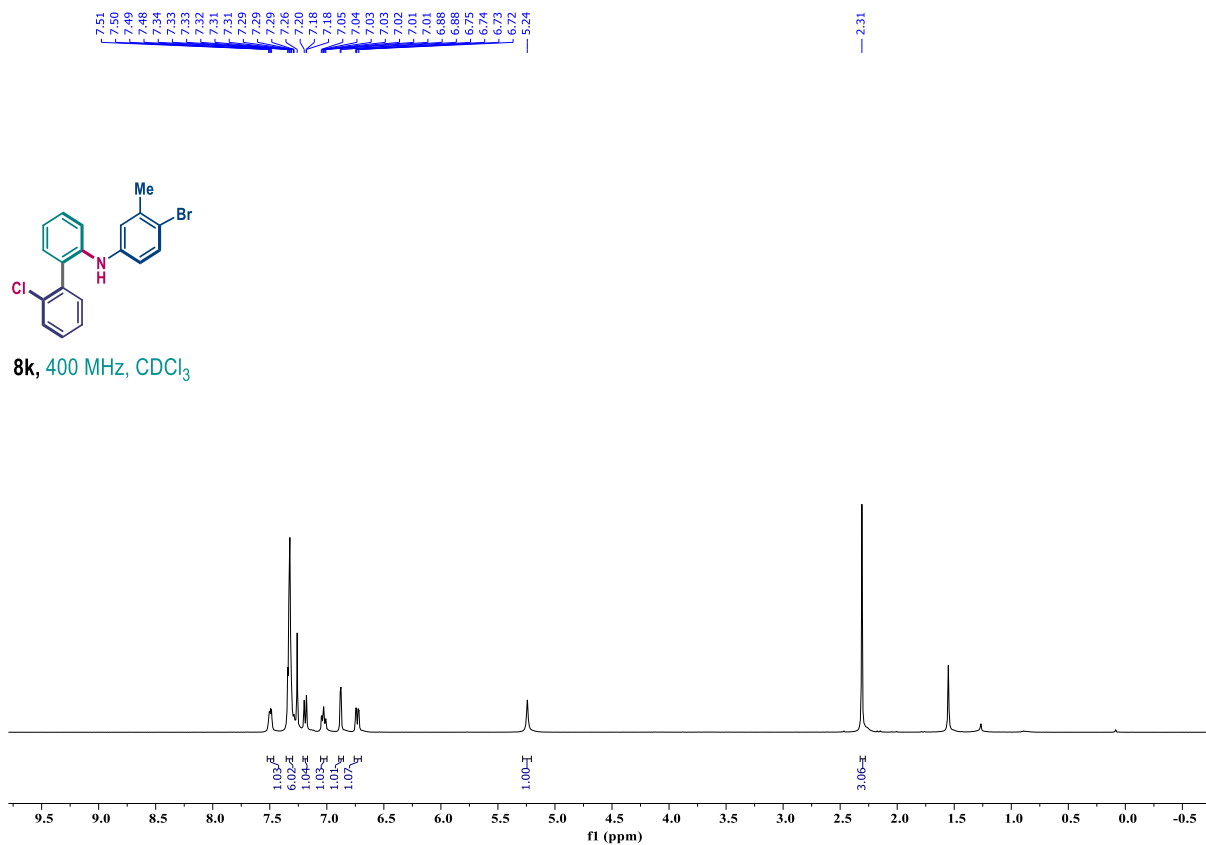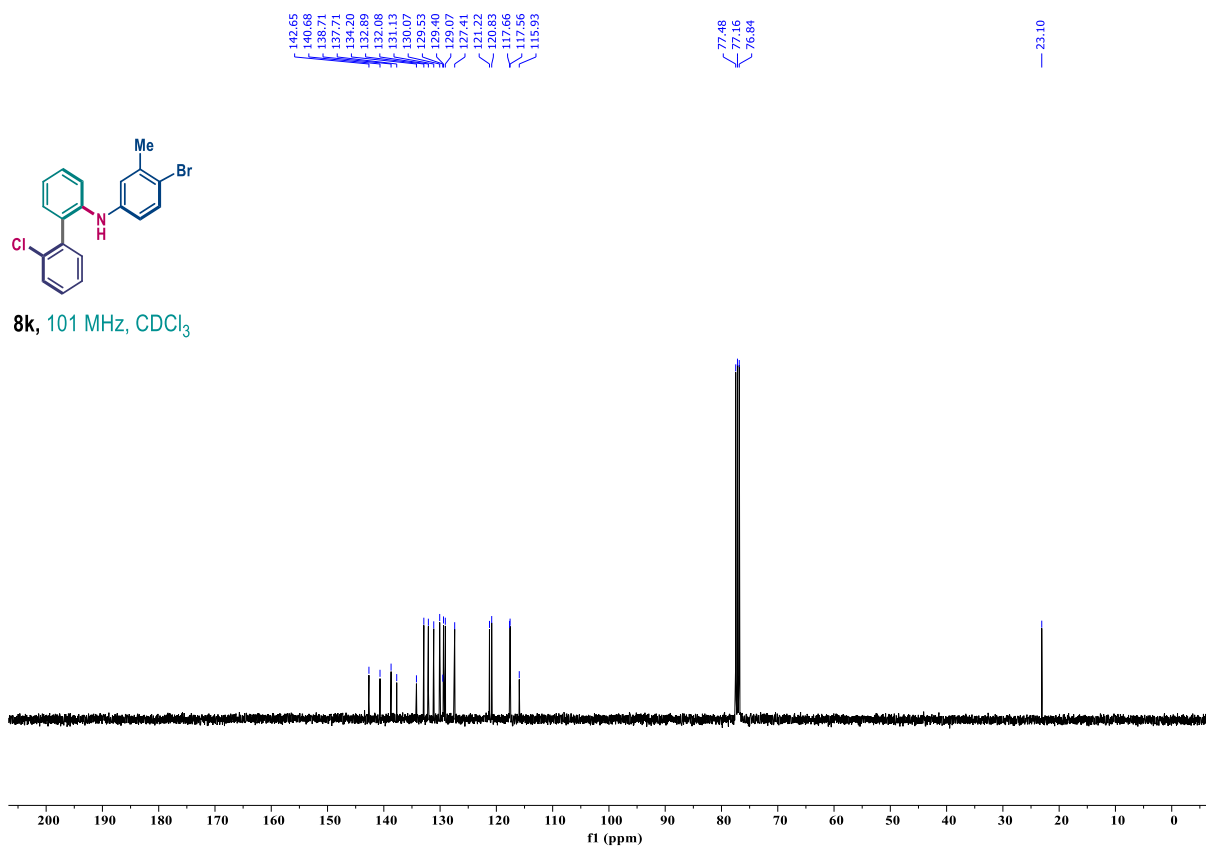

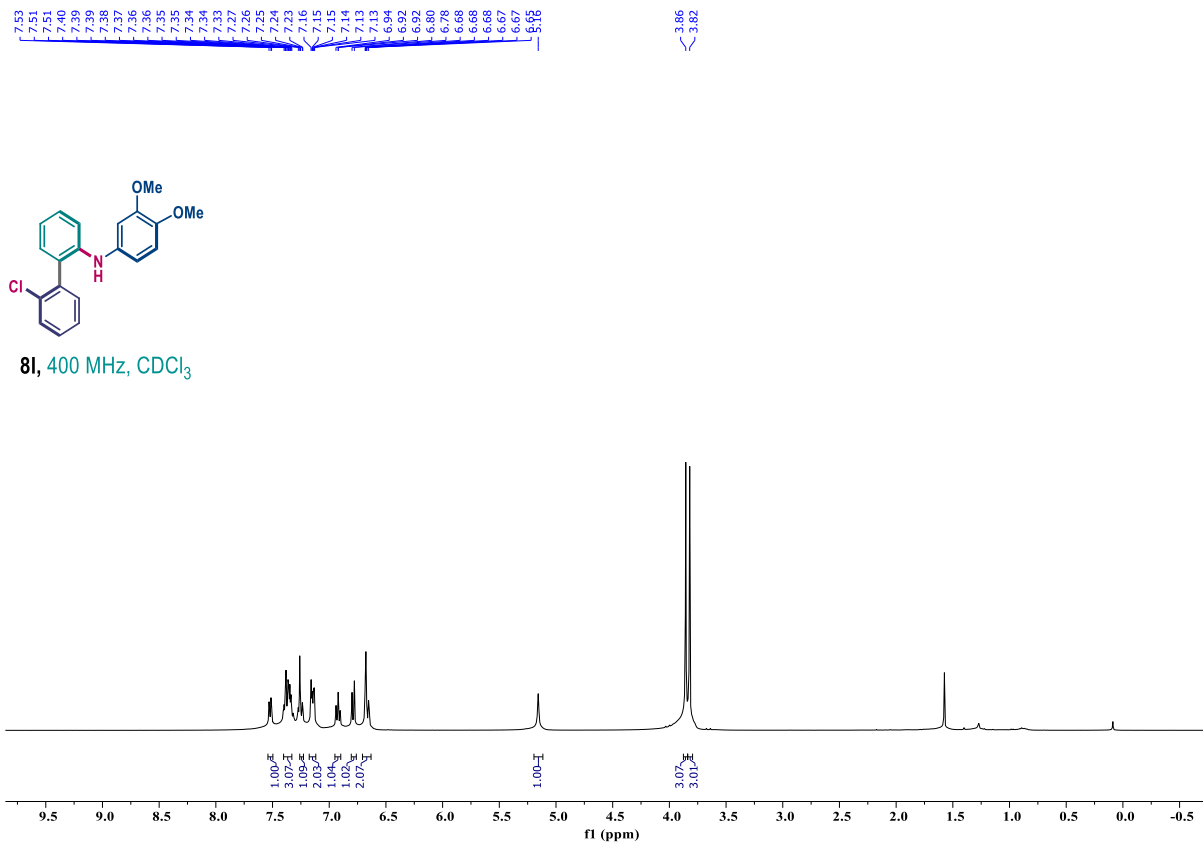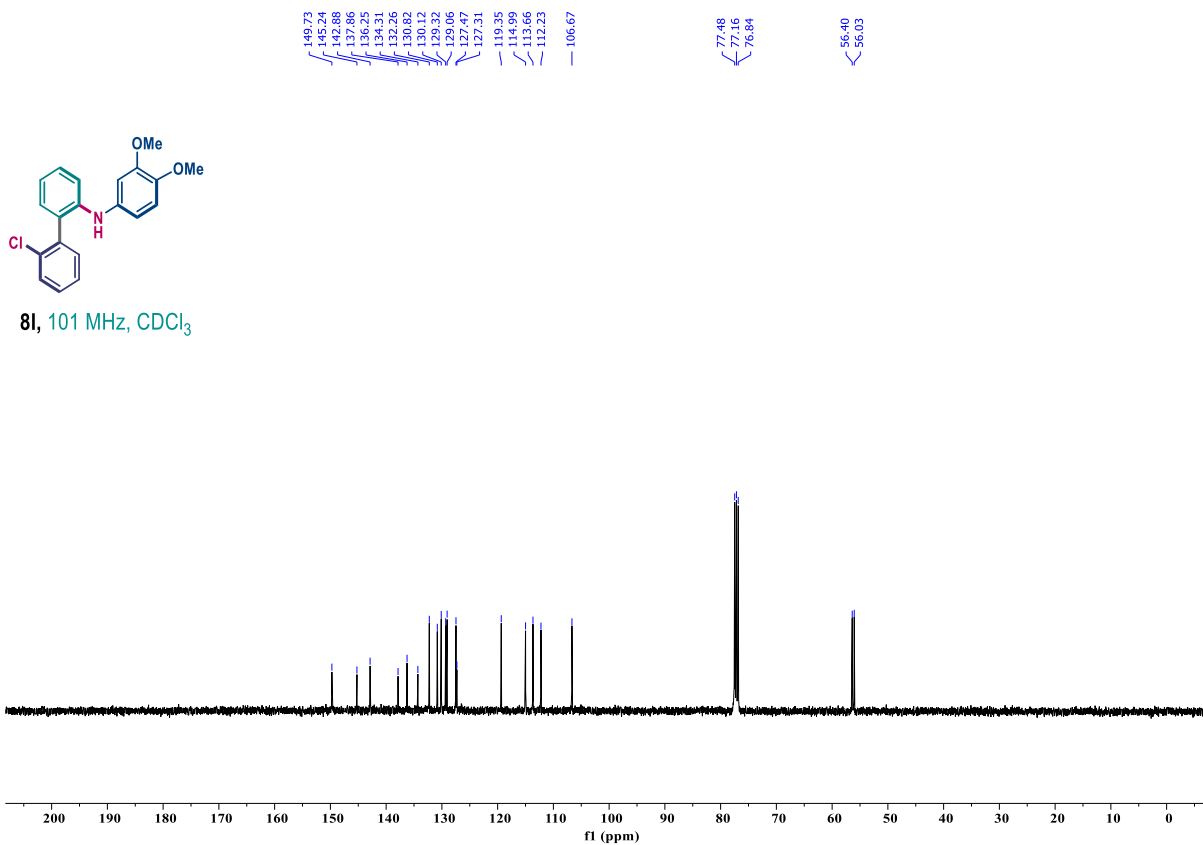

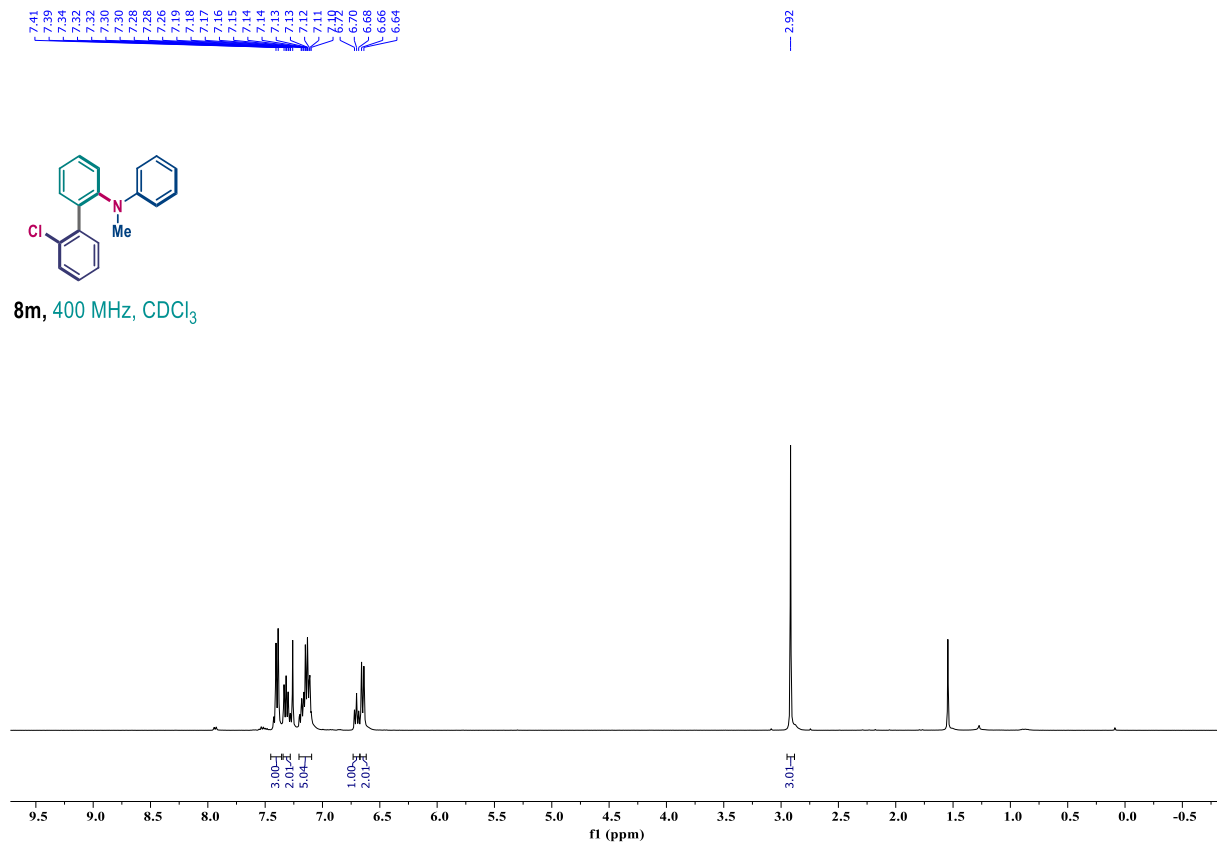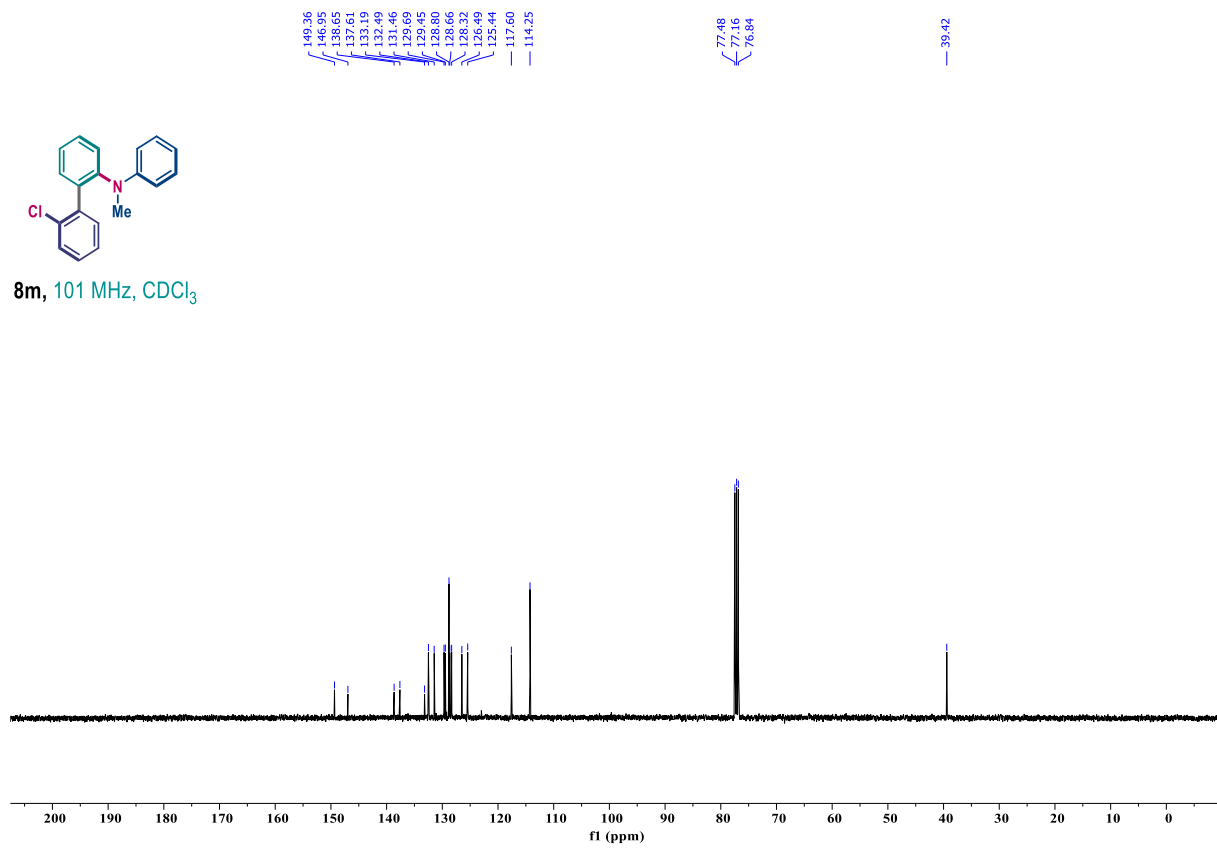

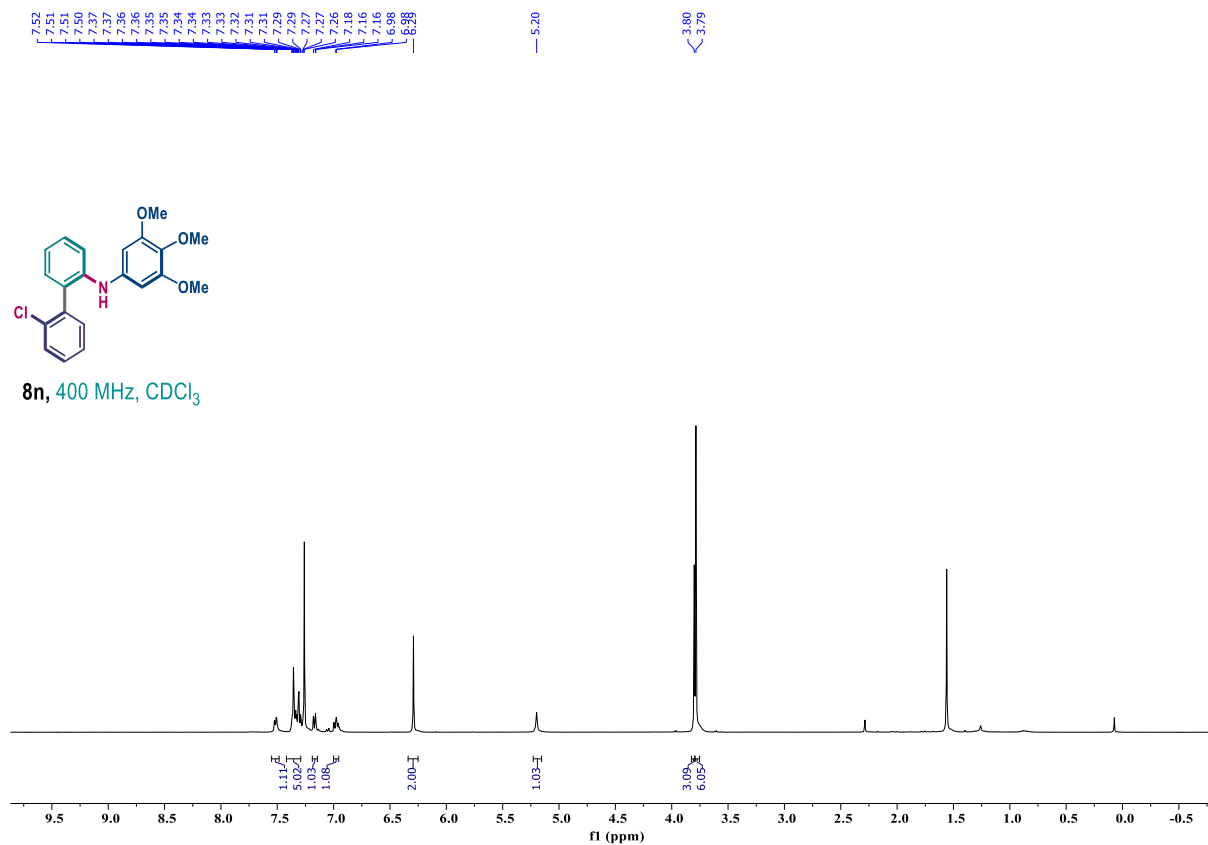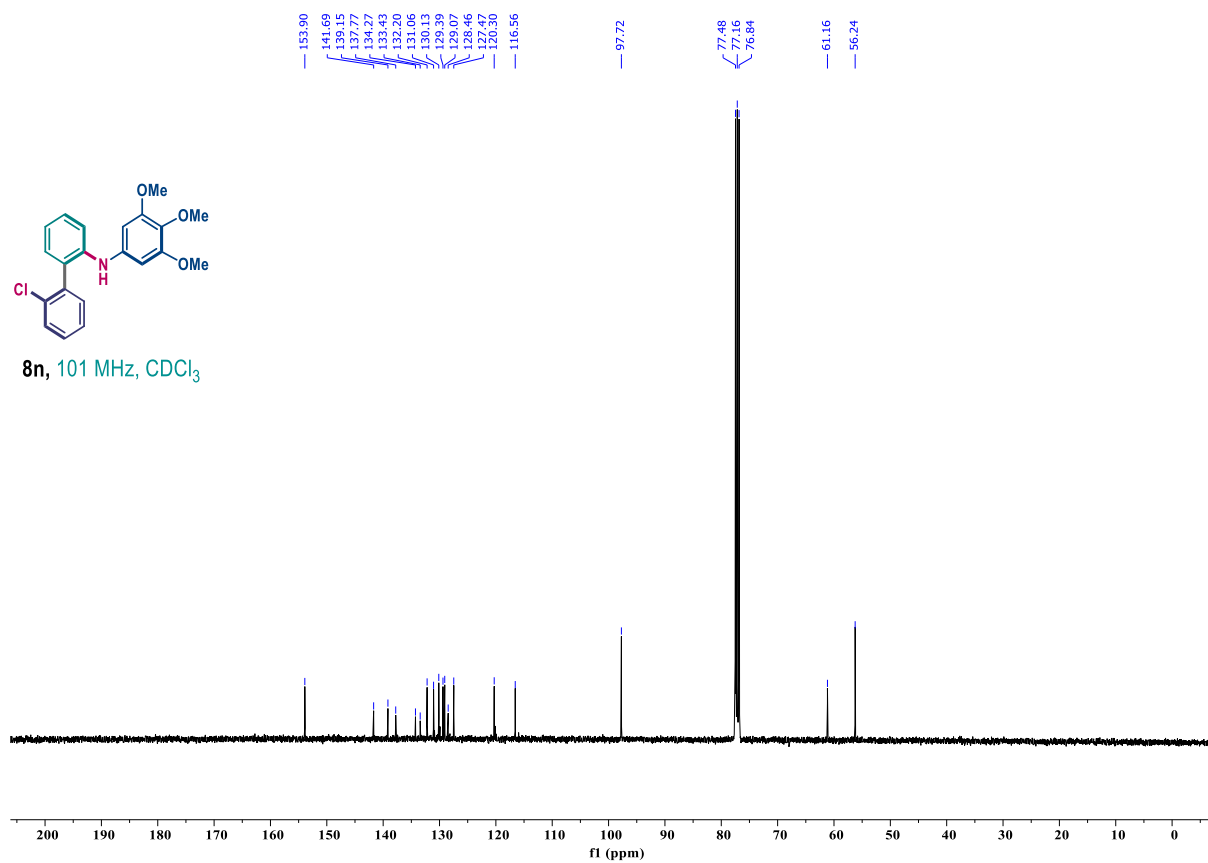

7.56  
7.54  
7.54  
7.45  
7.44  
7.43  
7.42  
7.41  
7.38  
7.36  
7.34  
7.34  
7.32  
7.27  
7.26  
7.25  
7.24  
7.23  
7.23  
7.06  
7.03  
7.00  
6.98  
6.67  
6.65

3.40  
3.37  
3.35  
3.32  
3.24  
2.92  
2.89  
2.87

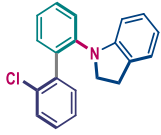

8o, 400 MHz, CDCl<sub>3</sub>

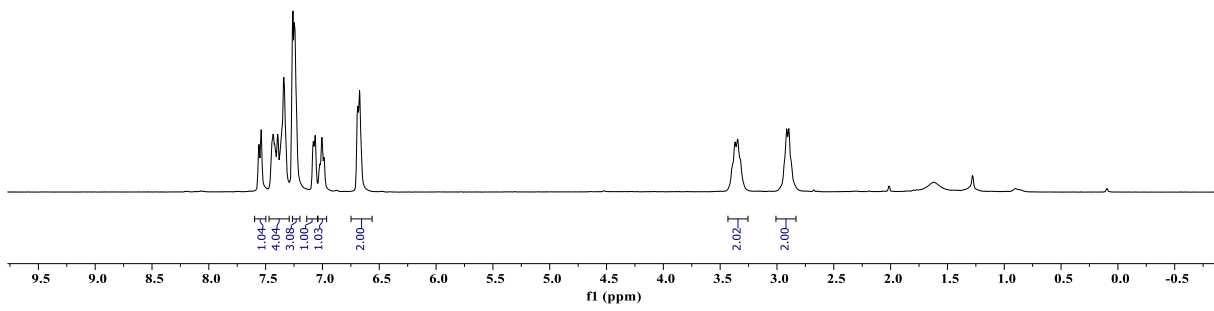

149.65  
144.10  
139.35  
138.69  
133.62  
132.03  
131.76  
130.46  
129.70  
129.16  
128.59  
127.03  
126.68  
124.75  
124.52  
123.16  
118.27

105.00

77.48  
77.16  
76.84

54.11

28.88

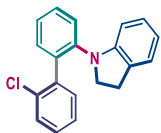

8o, 101 MHz, CDCl<sub>3</sub>

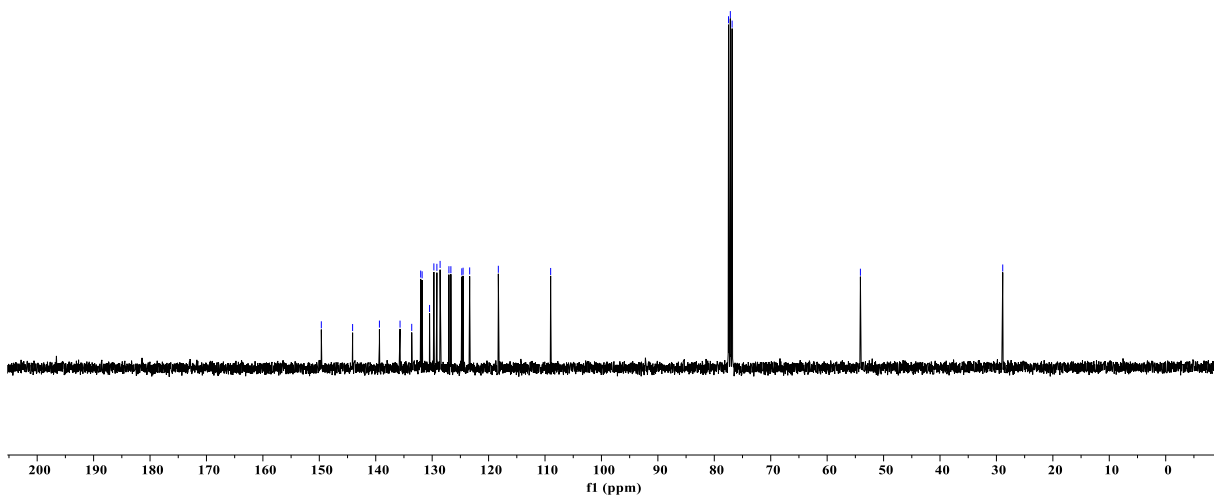

7.44  
7.43  
7.42  
7.41  
7.40  
7.39  
7.30  
7.26  
7.25  
7.24  
7.24  
7.23  
7.22  
7.21  
7.20  
7.18  
7.16  
6.94  
6.93  
6.81  
6.82  
6.81  
6.59  
6.56  
6.54

3.21  
3.09  
2.72  
2.68  
2.66  
1.77  
1.60

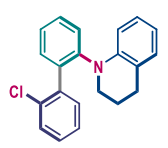

8p, 400 MHz, CDCl<sub>3</sub>

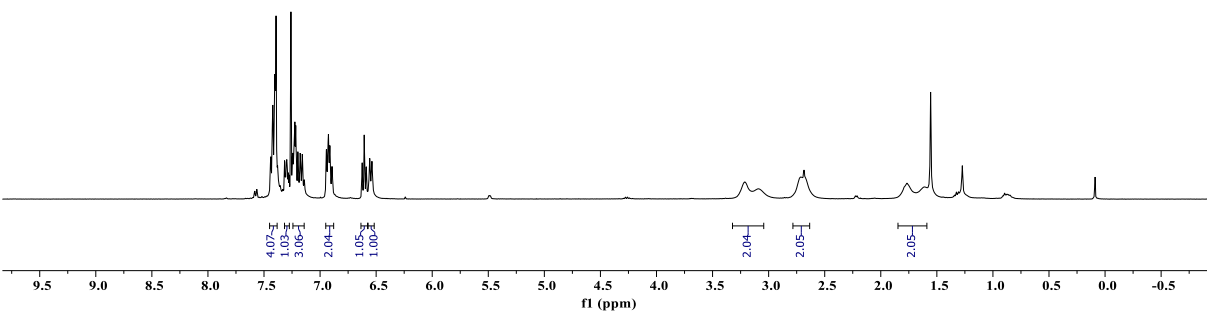

146.42  
145.27  
138.69  
137.82  
132.47  
131.57  
129.70  
129.42  
128.33  
128.67  
128.51  
128.44  
126.54  
126.47  
125.41  
122.81  
117.15  
114.78

77.48  
77.16  
76.84  
50.64  
27.90  
21.87

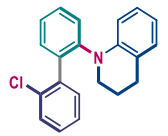

8p, 400 MHz, CDCl<sub>3</sub>

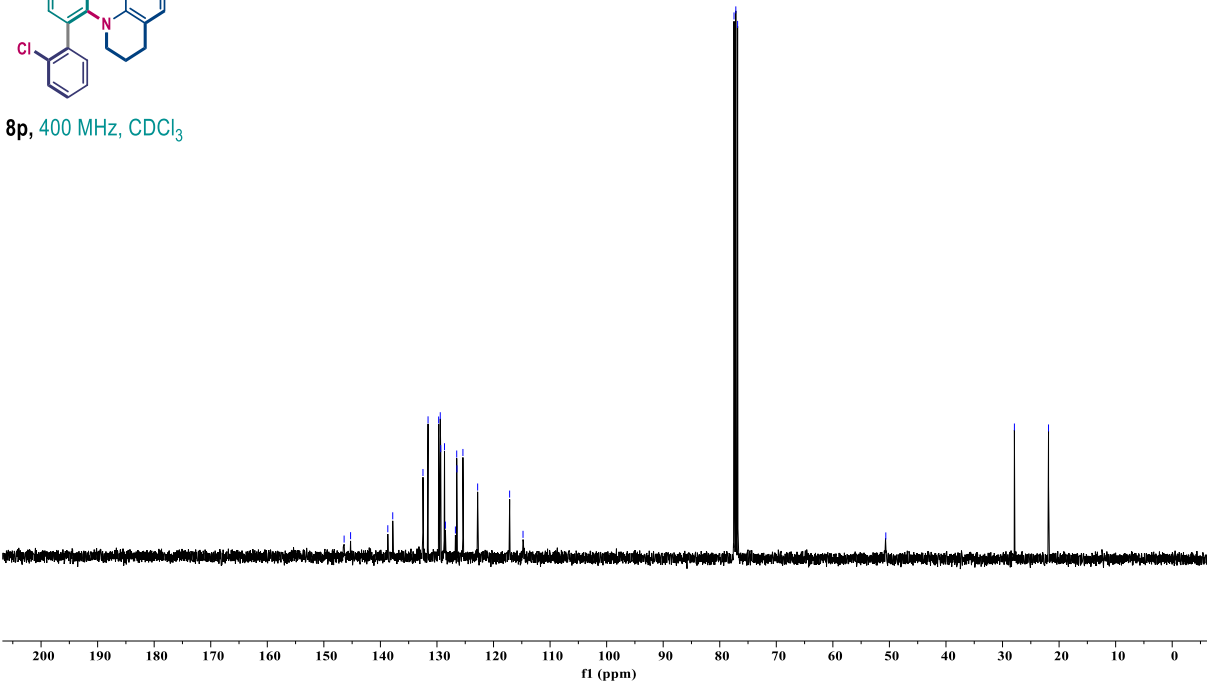



7.41  
7.40  
7.39  
7.39  
7.38  
7.38  
7.25  
7.24  
7.24  
7.24  
7.23  
7.23  
7.22  
7.22  
7.21  
7.21  
7.19  
7.19  
7.18  
7.18  
7.17  
7.17  
7.16  
7.16  
7.14  
7.14  
7.12  
7.12  
7.09  
7.09  
7.08  
7.08  
7.06  
7.06  
7.05  
7.05  
7.05  
7.04  
7.04  
7.04  
7.04  
7.03  
7.03  
7.02  
7.02  
7.01  
7.01  
7.00  
7.00  
6.99  
6.99  
6.98  
6.97  
6.97  
6.97  
6.96  
6.96  
6.95  
6.95  
6.95  
6.94  
6.94  
6.93  
6.93  
6.91  
6.91  
6.90  
6.90  
6.89  
6.88  
6.88  
6.87  
6.87  
6.86  
6.85  
6.85  
6.84  
6.84  
6.83  
6.83  
6.82  
6.82  
6.81  
6.81  
5.17  
5.05  
2.27  
2.25  
2.21  
2.19

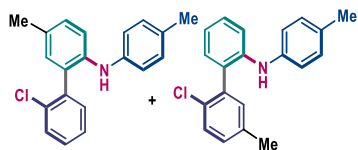

**8s + 8s'**  
(regioisomeric ratio = 2.4:1)  
400 MHz, CDCl<sub>3</sub>

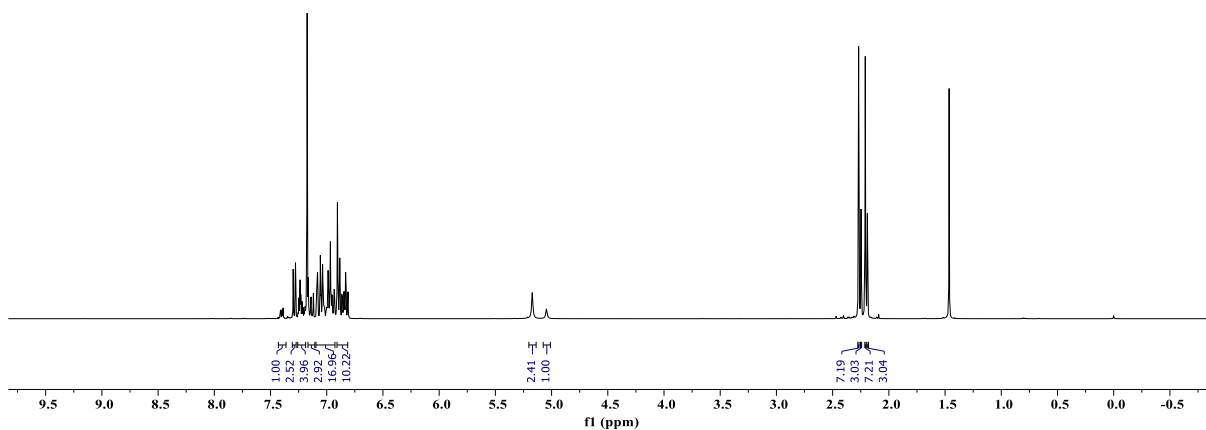

149.01  
144.21  
140.38  
139.19  
138.12  
137.55  
137.33  
132.80  
132.17  
131.78  
131.59  
131.15  
130.81  
130.07  
129.97  
129.90  
129.85  
129.72  
129.71  
129.16  
128.88  
128.23  
127.30  
120.26  
119.79  
119.02  
117.80  
115.68  
77.48  
77.16  
76.84  
20.98  
20.84  
20.78  
20.74

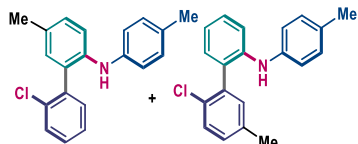

**8s + 8s'**  
(regioisomeric ratio = 2.4:1)  
101 MHz, CDCl<sub>3</sub>

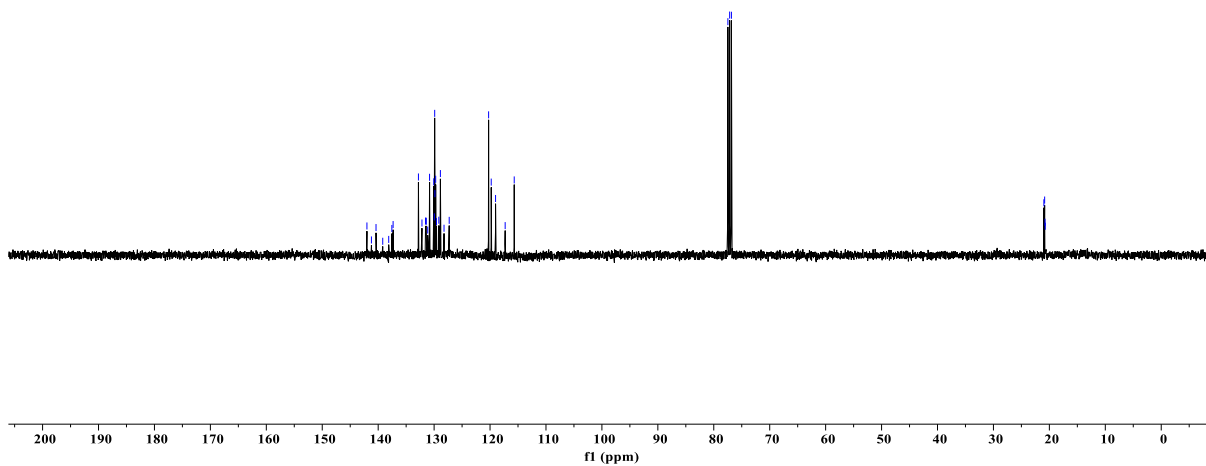

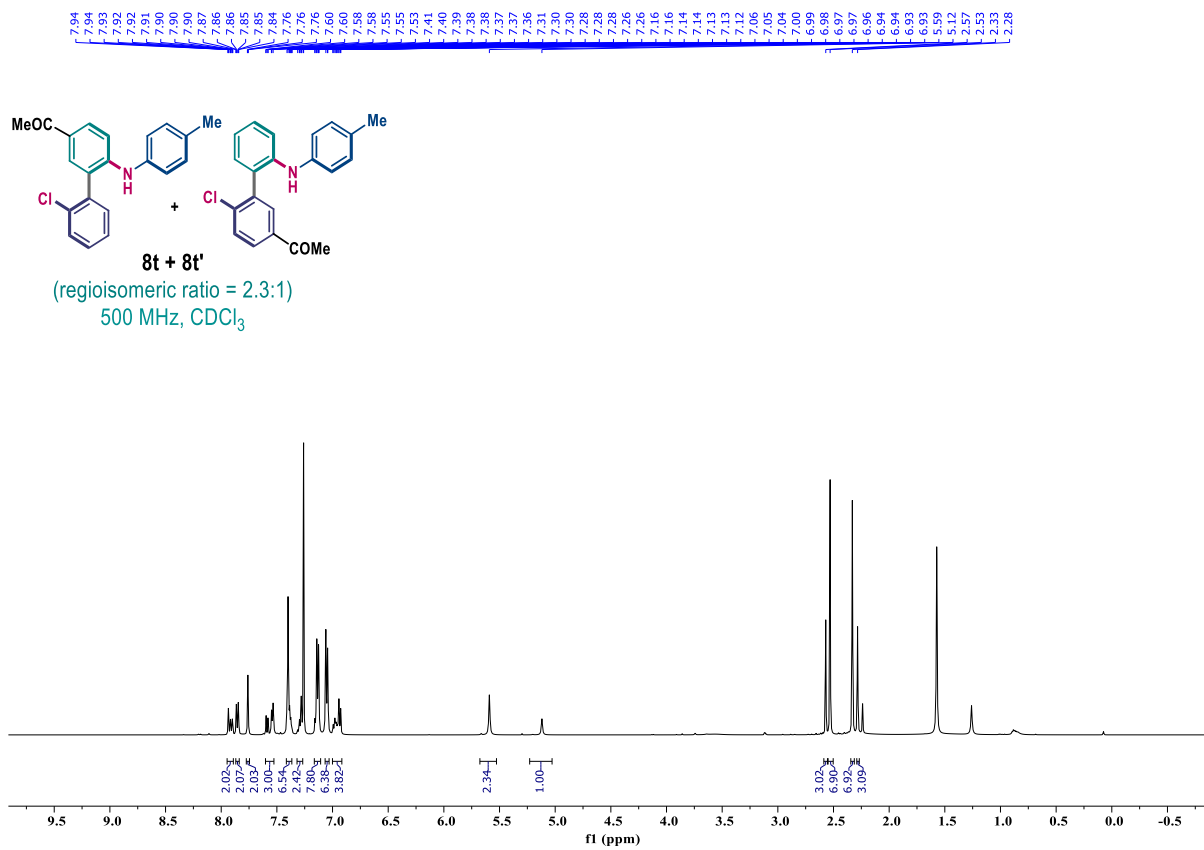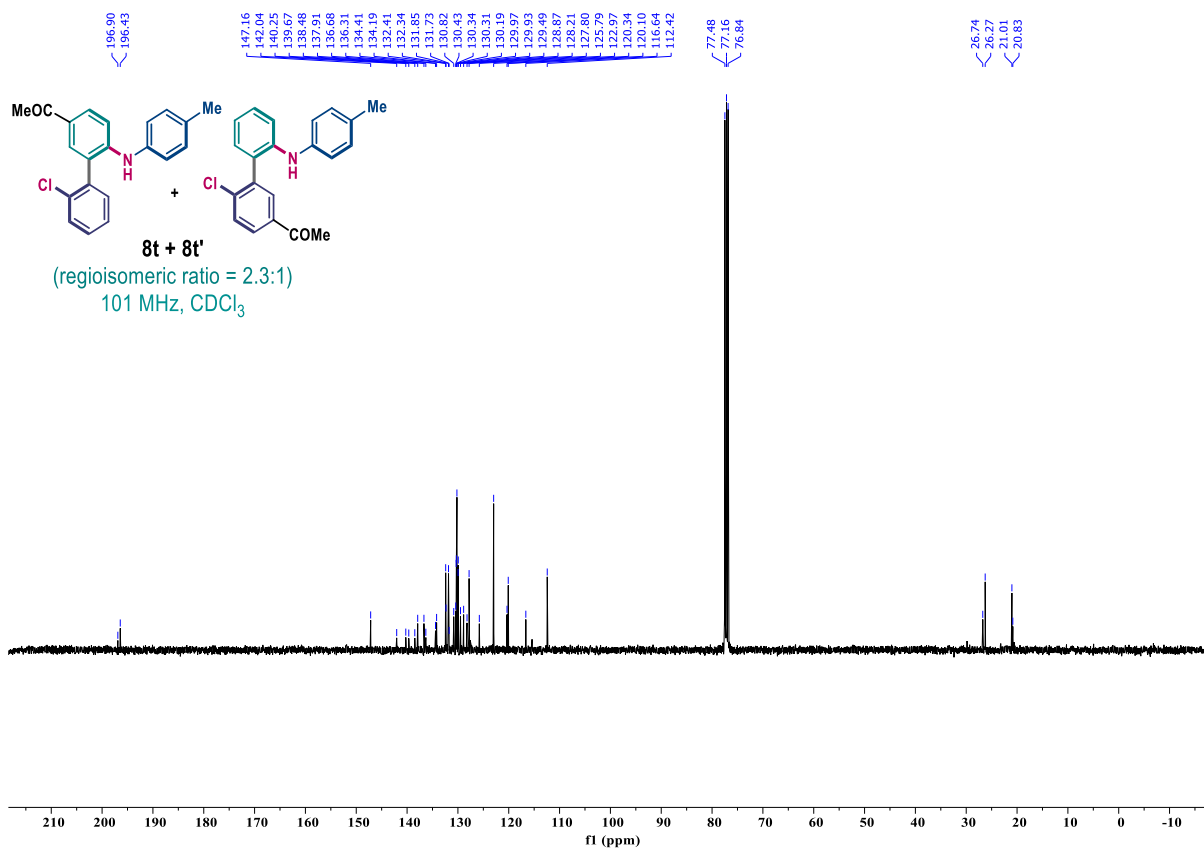

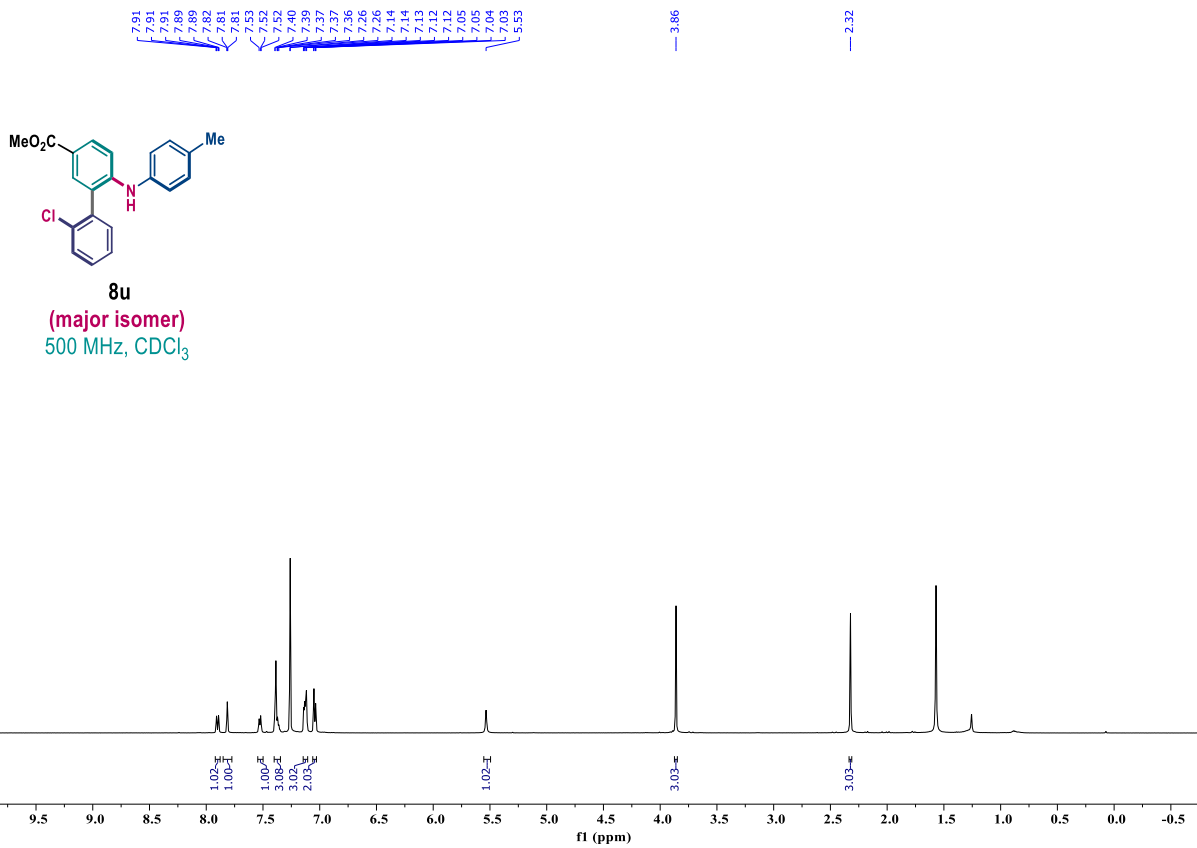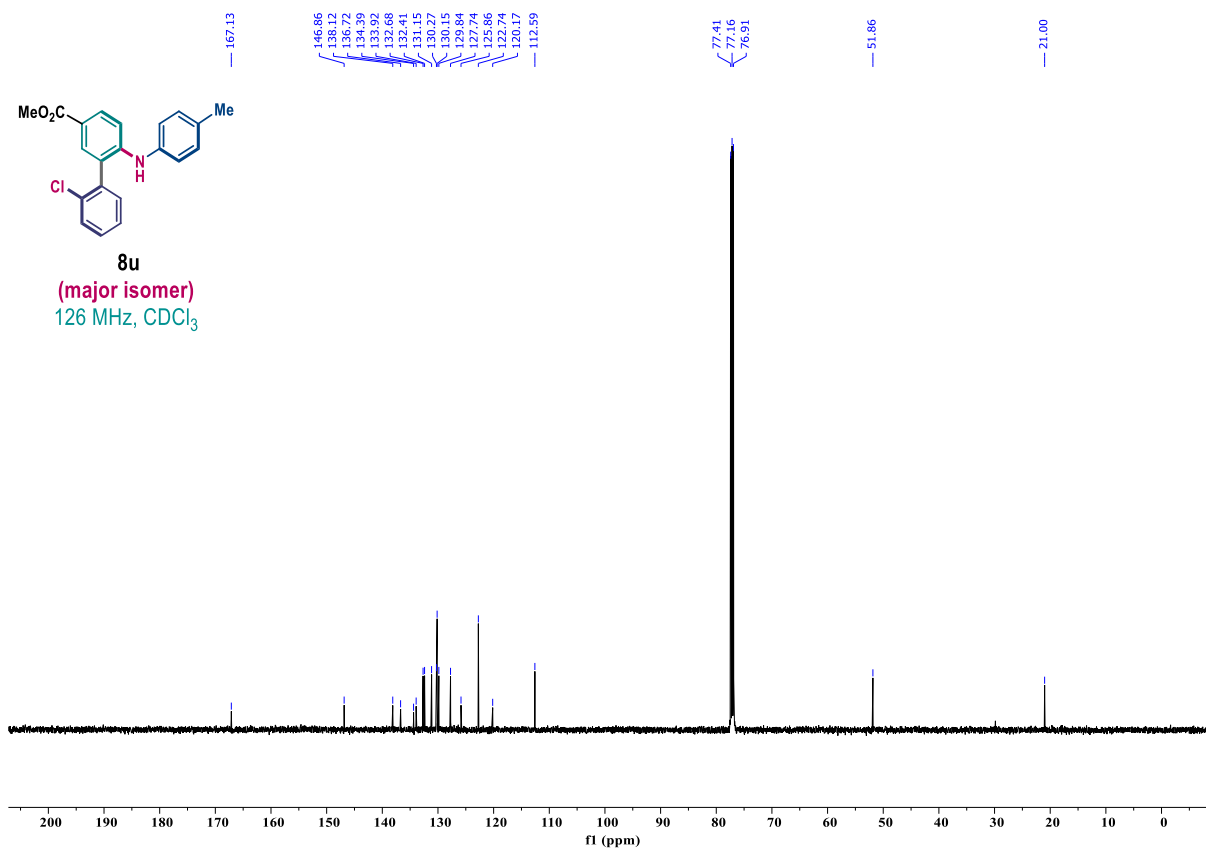

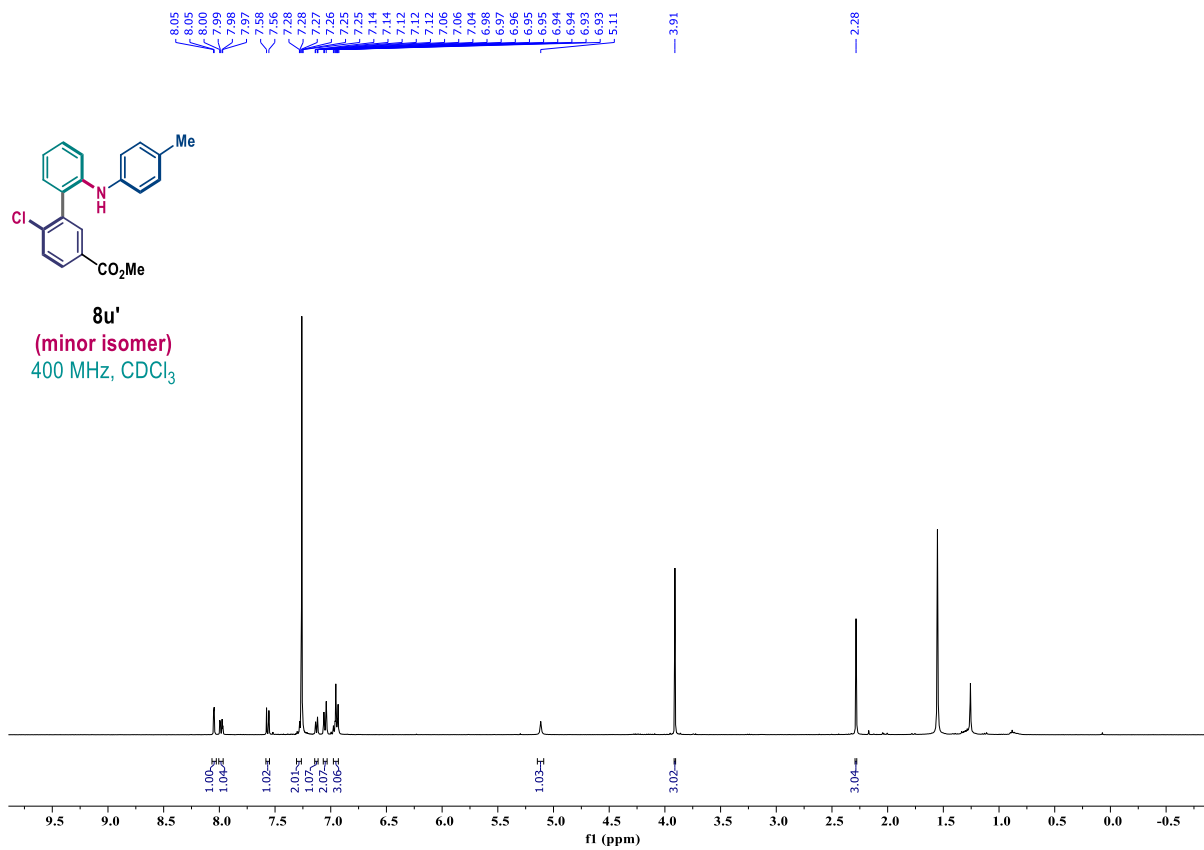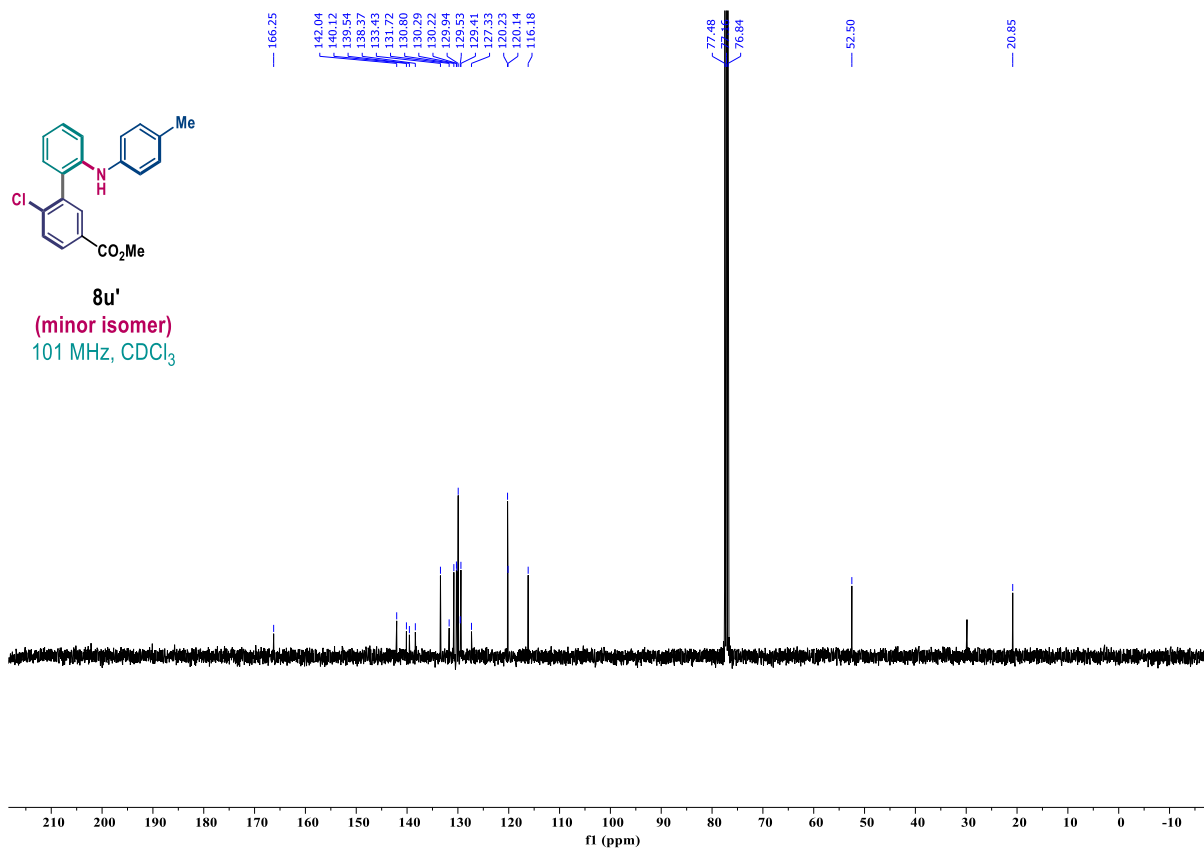

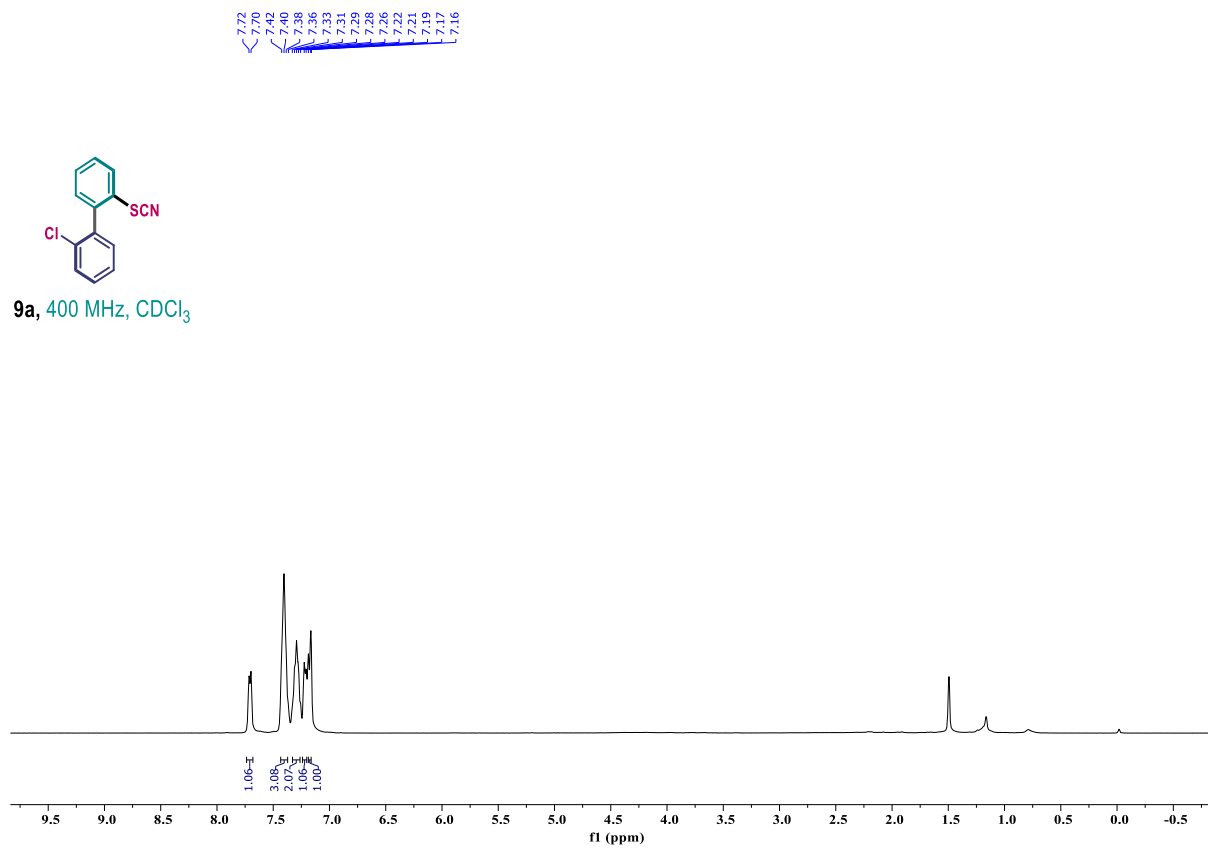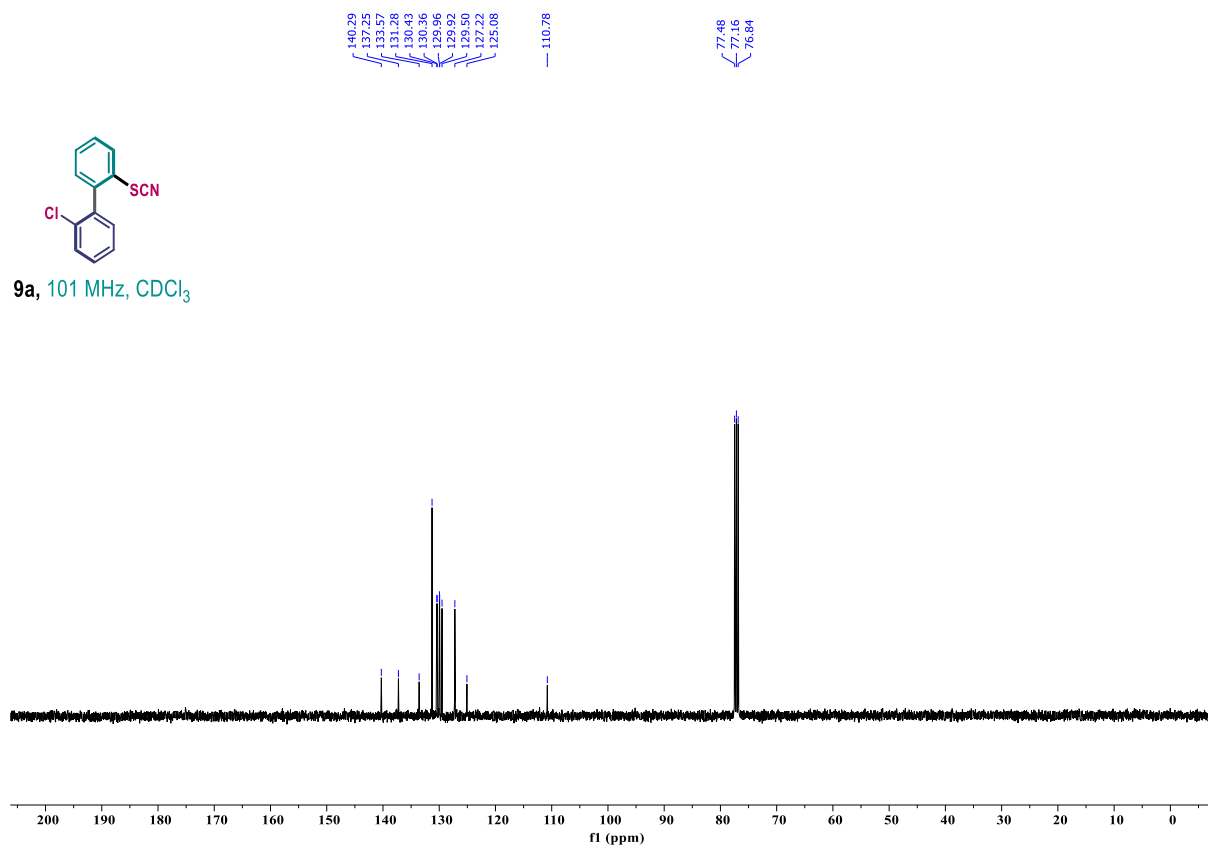

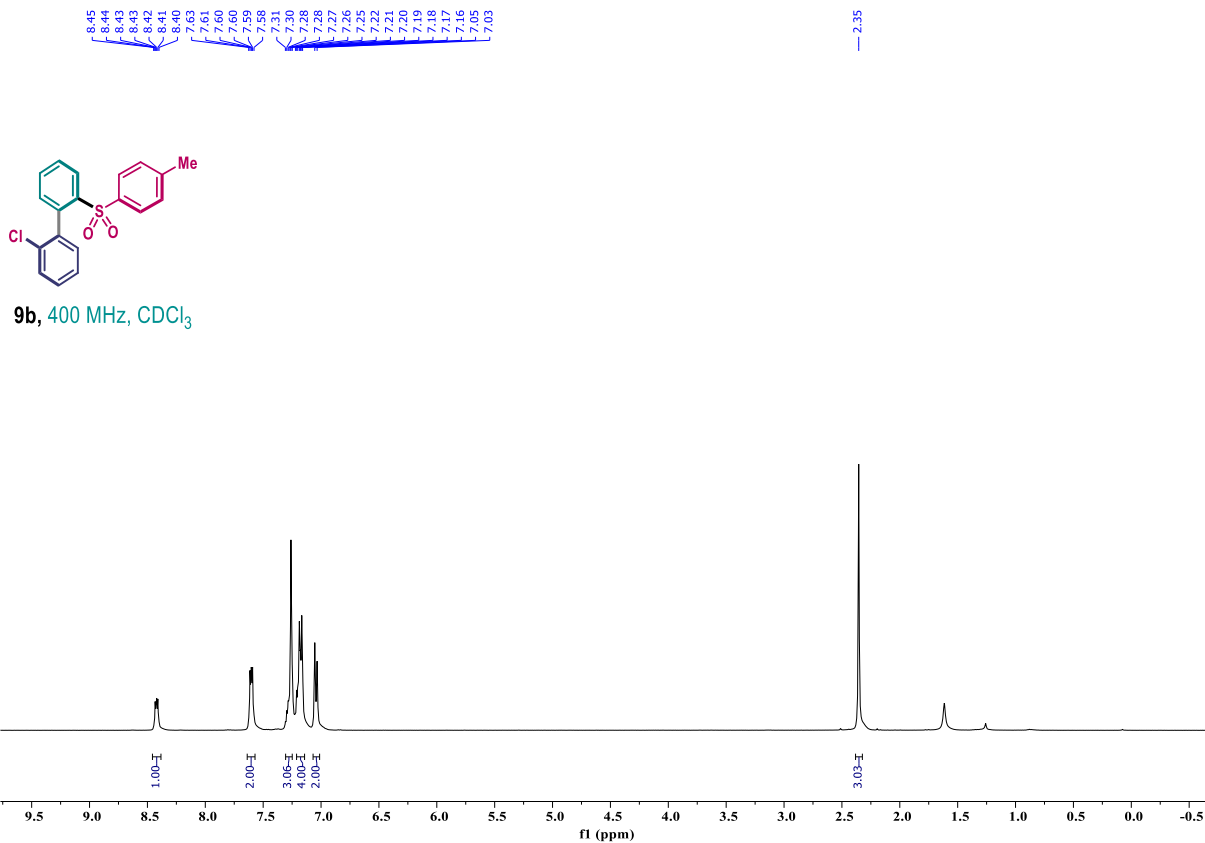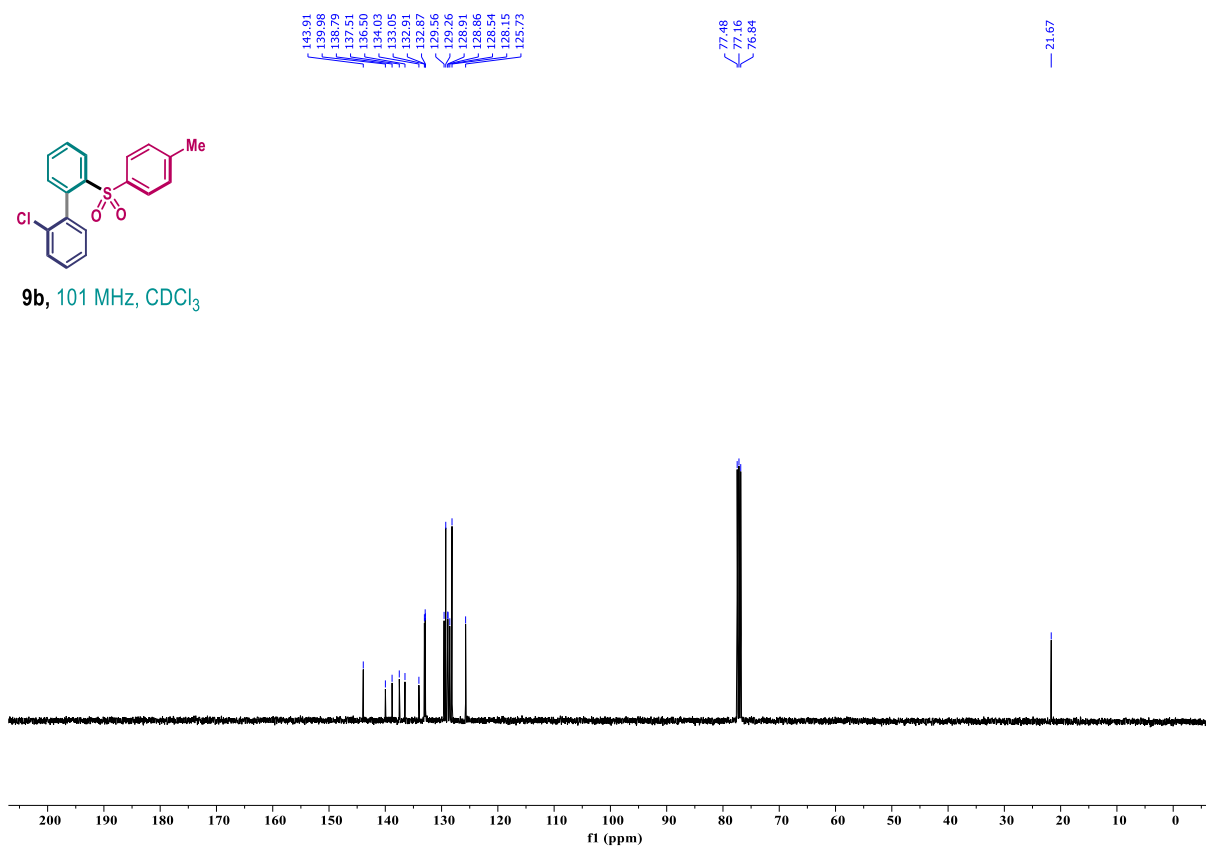

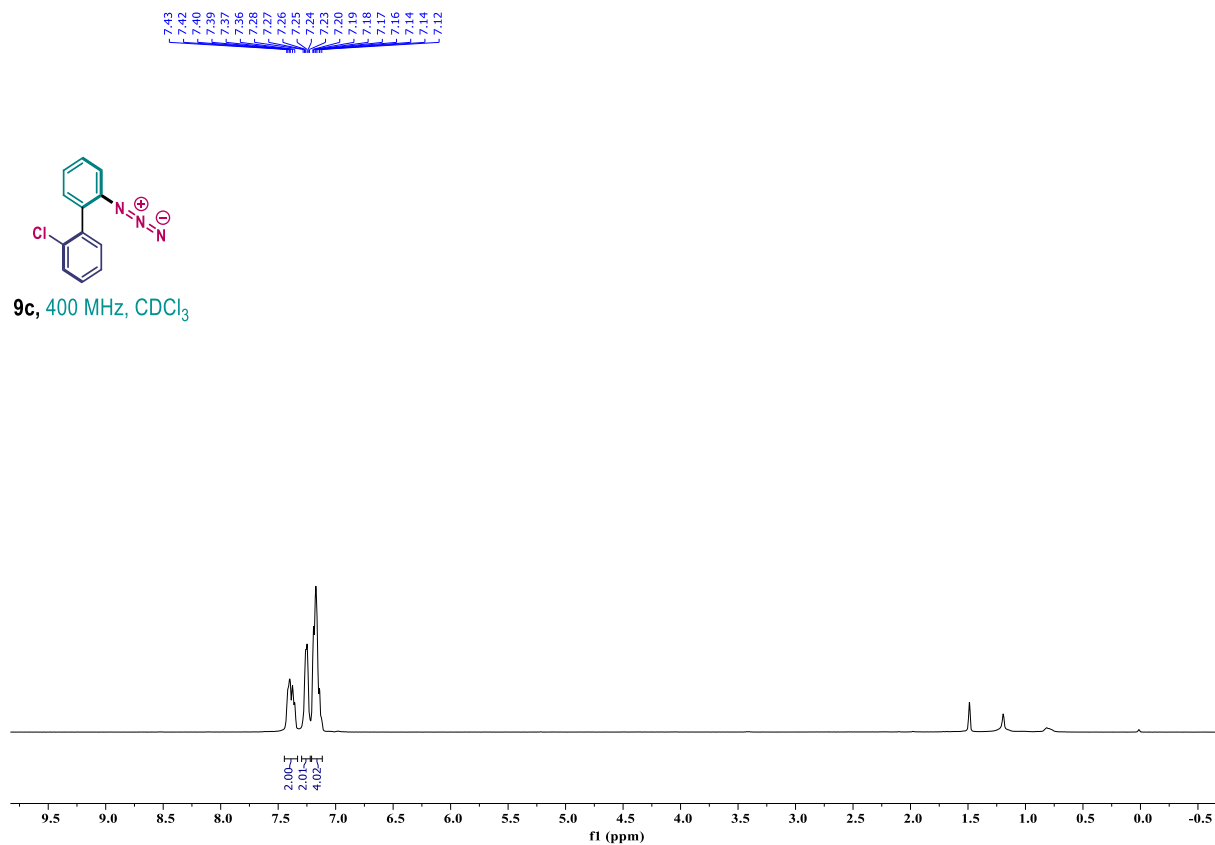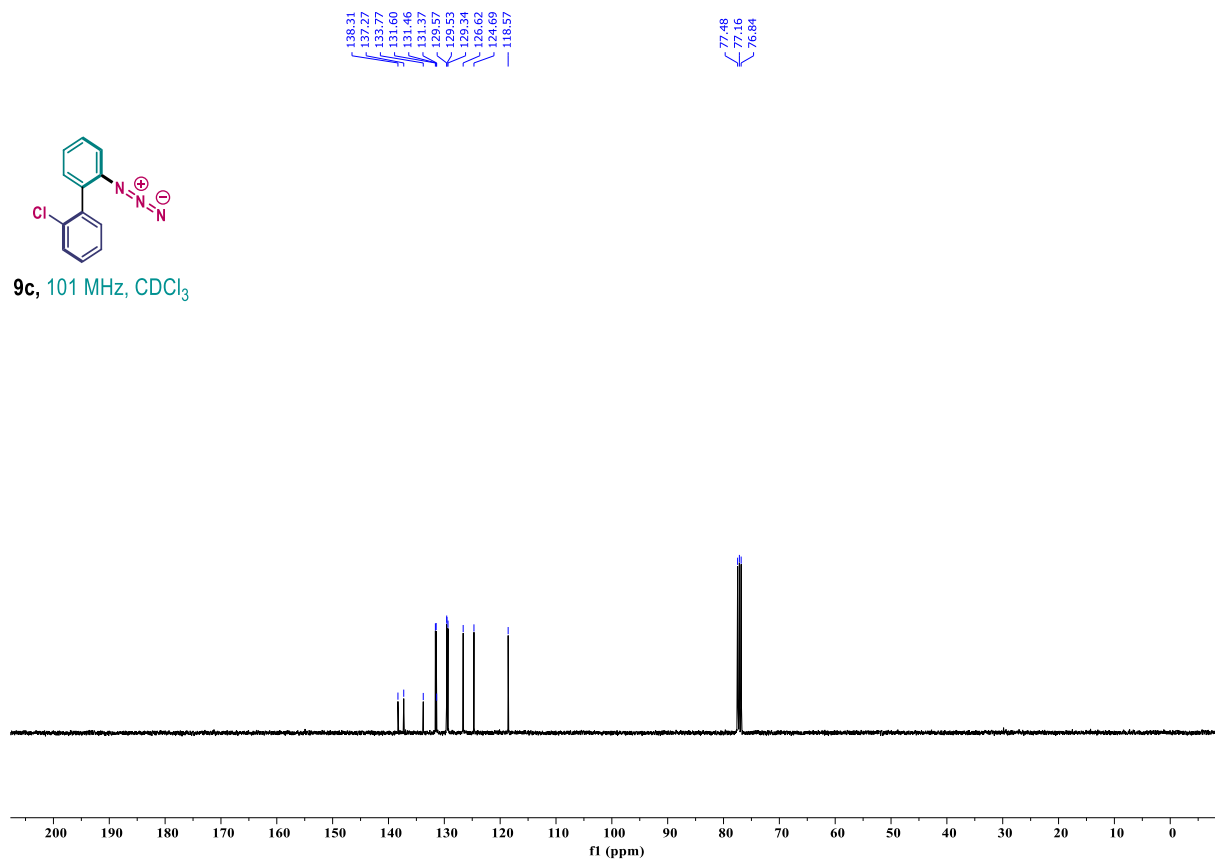

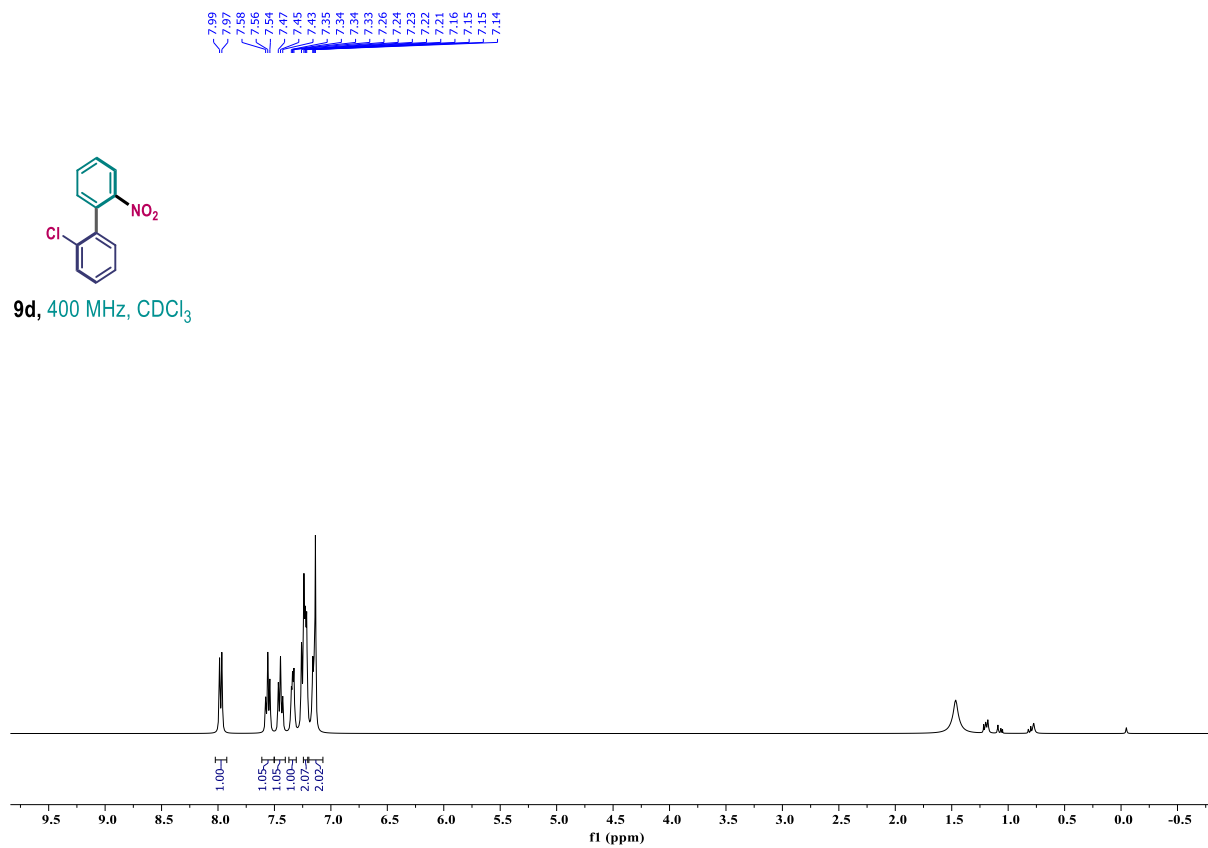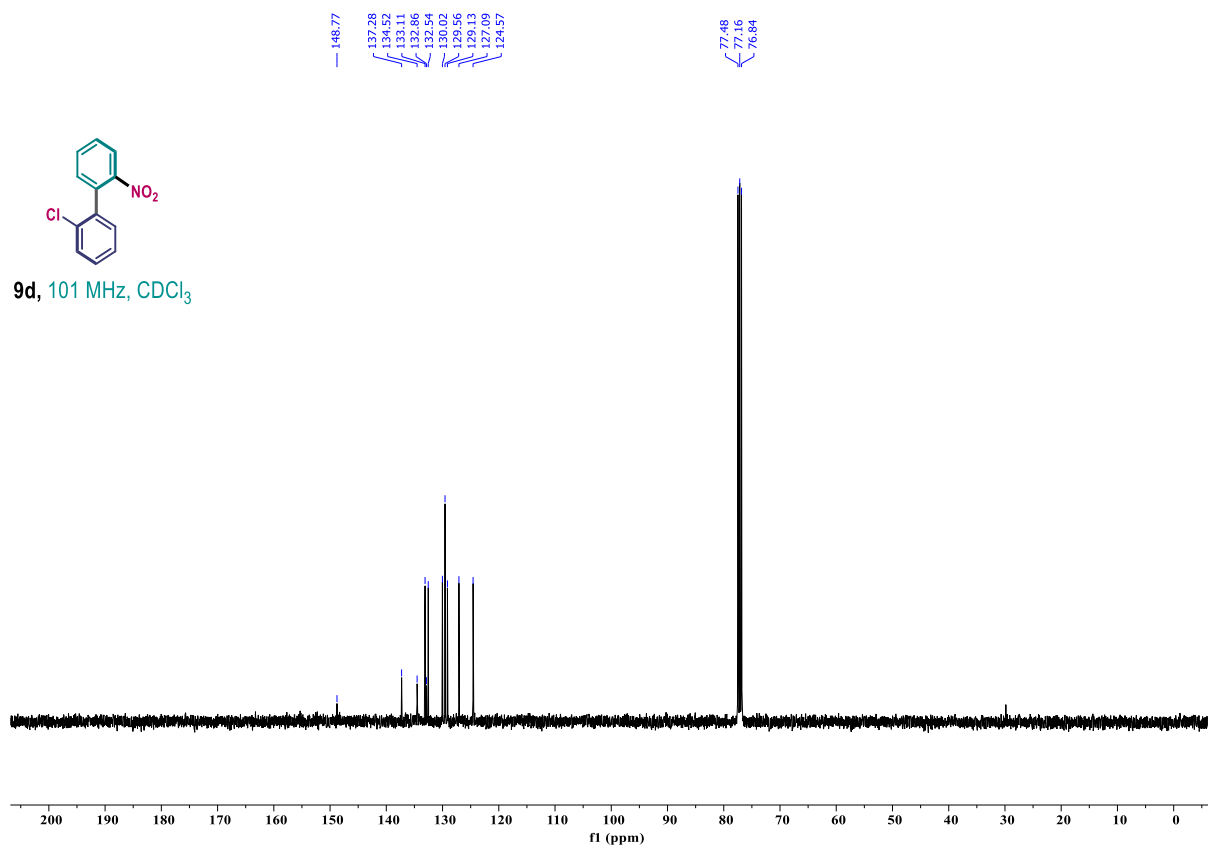



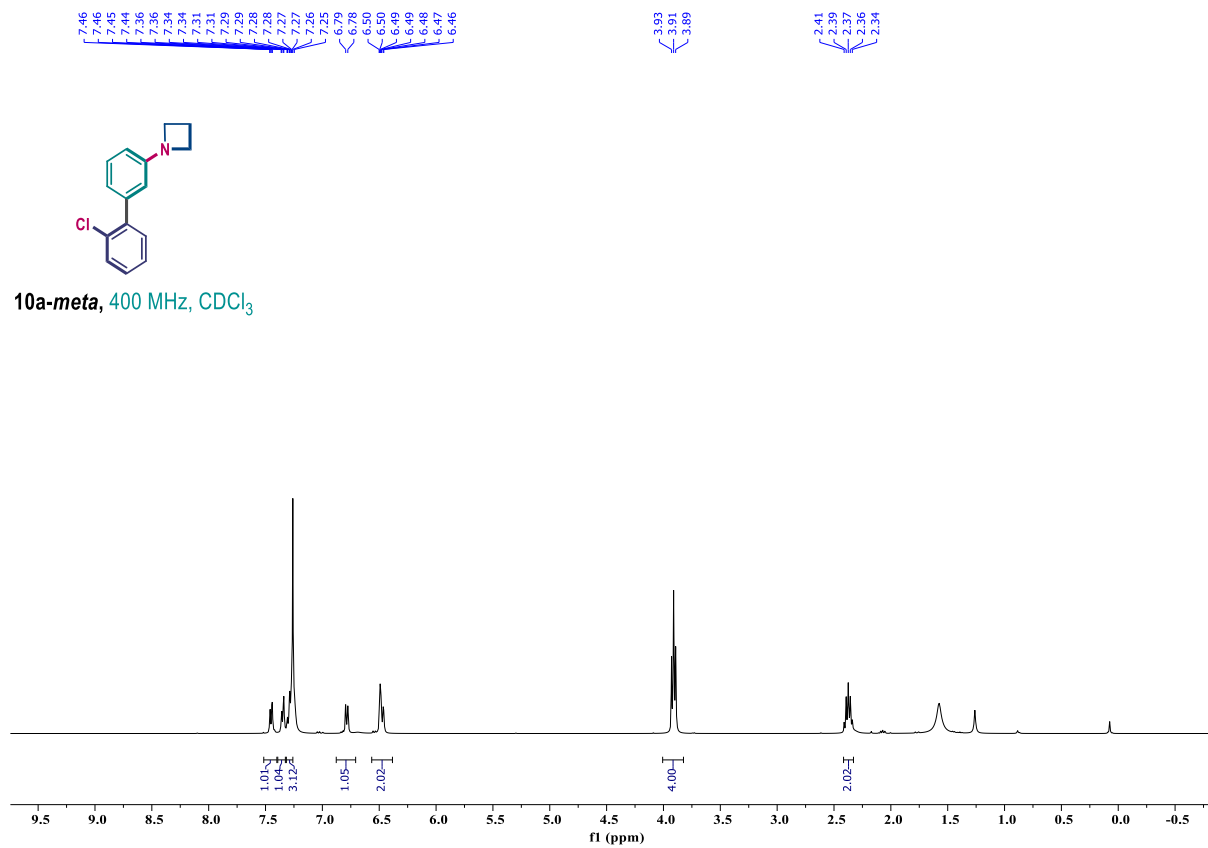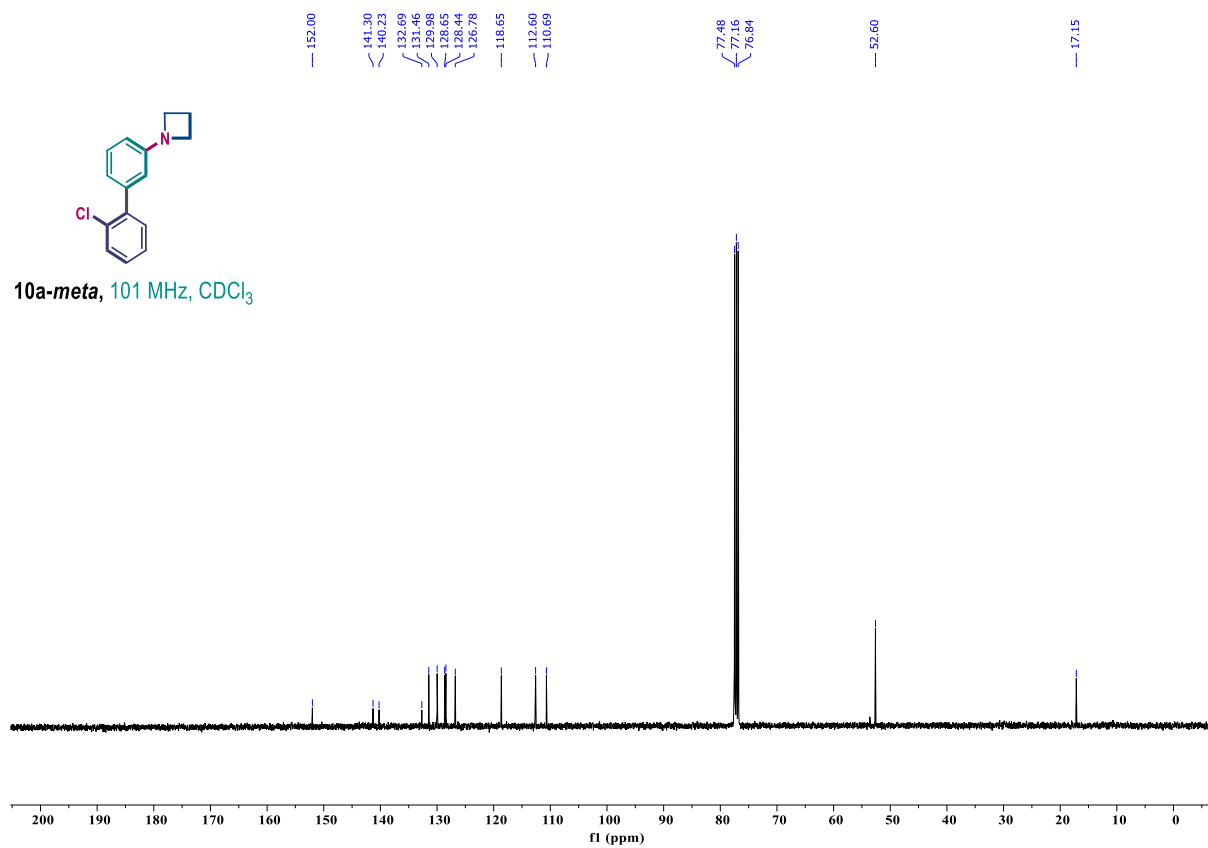

7.46  
7.45  
7.44  
7.44  
7.43  
7.43  
7.42  
7.41  
7.36  
7.35  
7.35  
7.34  
7.33  
7.33  
7.29  
7.28  
7.28  
7.27  
7.27  
7.26  
7.25  
7.25  
7.23  
7.23  
7.05  
7.05  
7.03  
7.03  
6.84  
6.84  
6.82  
6.82  
6.80  
6.80  
6.56  
6.56  
6.54  
6.54  
3.54  
3.52  
3.51  
3.49  
3.44  
3.42  
3.40  
3.38  
2.11  
2.09  
2.08  
2.06  
2.04

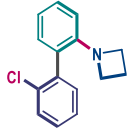

10a-ortho, 400 MHz, CDCl<sub>3</sub>

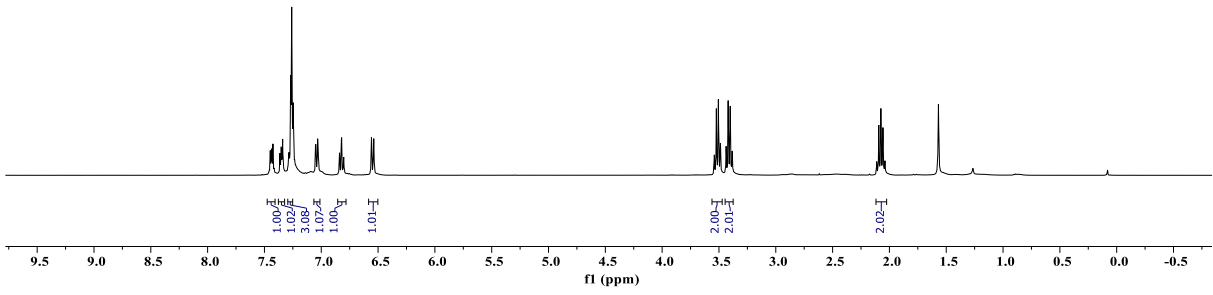

149.98  
139.98  
134.29  
132.55  
131.51  
129.36  
128.62  
128.51  
128.32  
126.82  
117.71  
112.81  
77.48  
77.06  
76.84  
53.60  
17.09

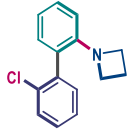

10a-ortho, 101 MHz, CDCl<sub>3</sub>

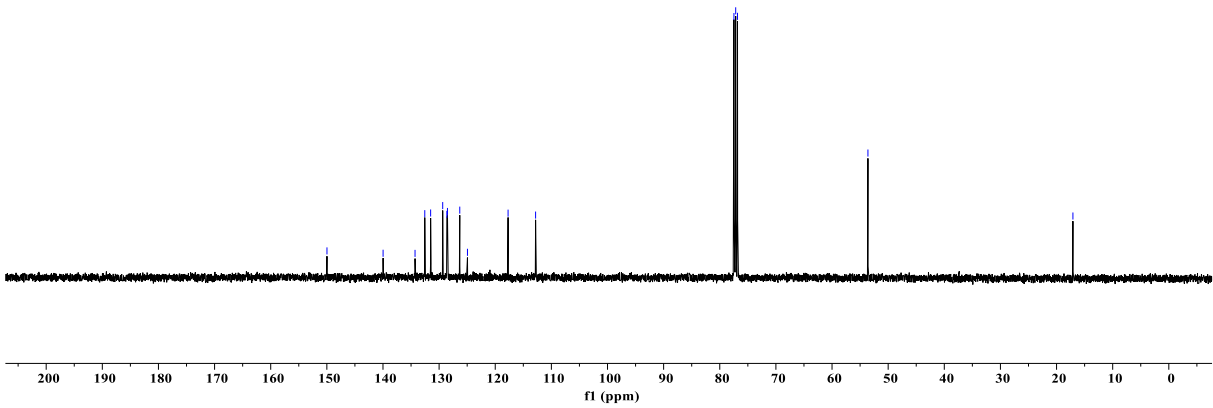

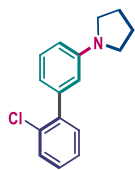

10b-meta, 400 MHz, CDCl<sub>3</sub>

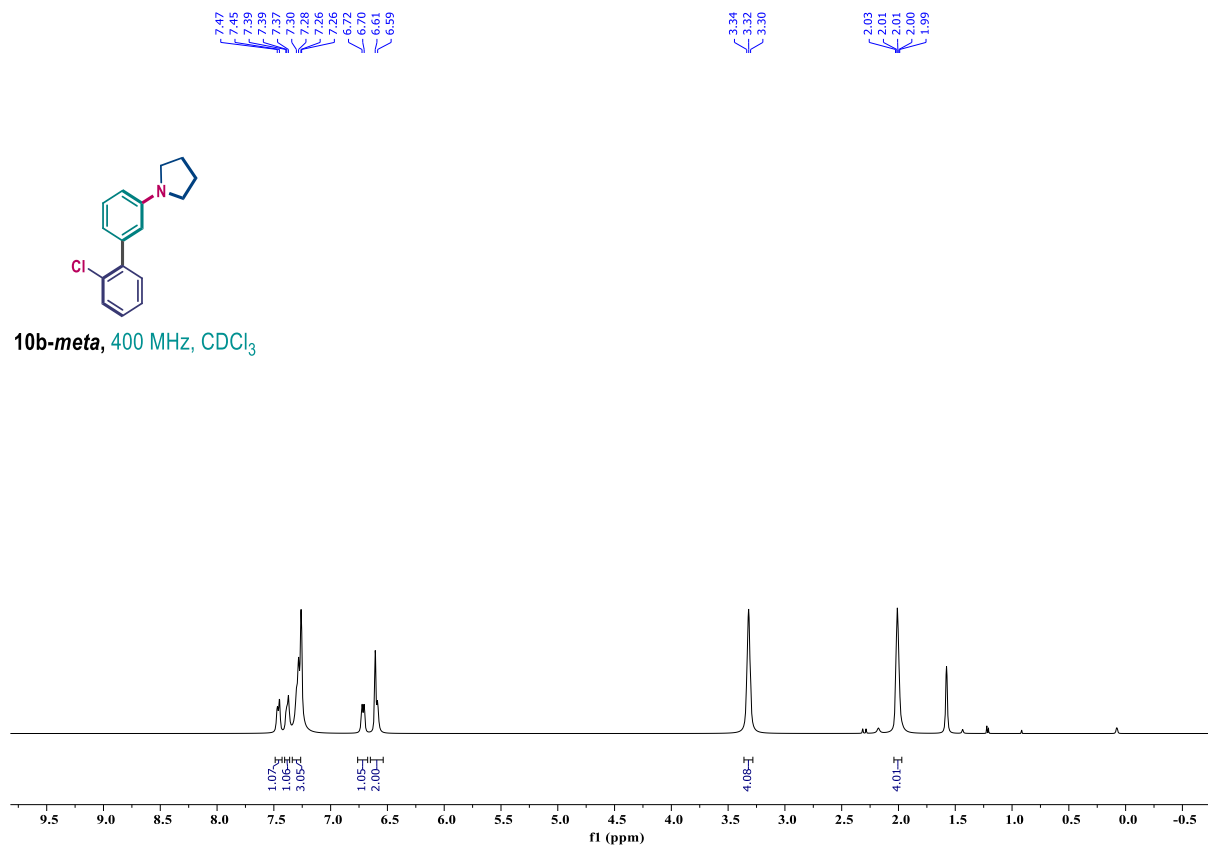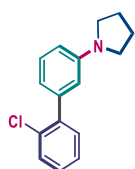

10b-meta, 101 MHz, CDCl<sub>3</sub>

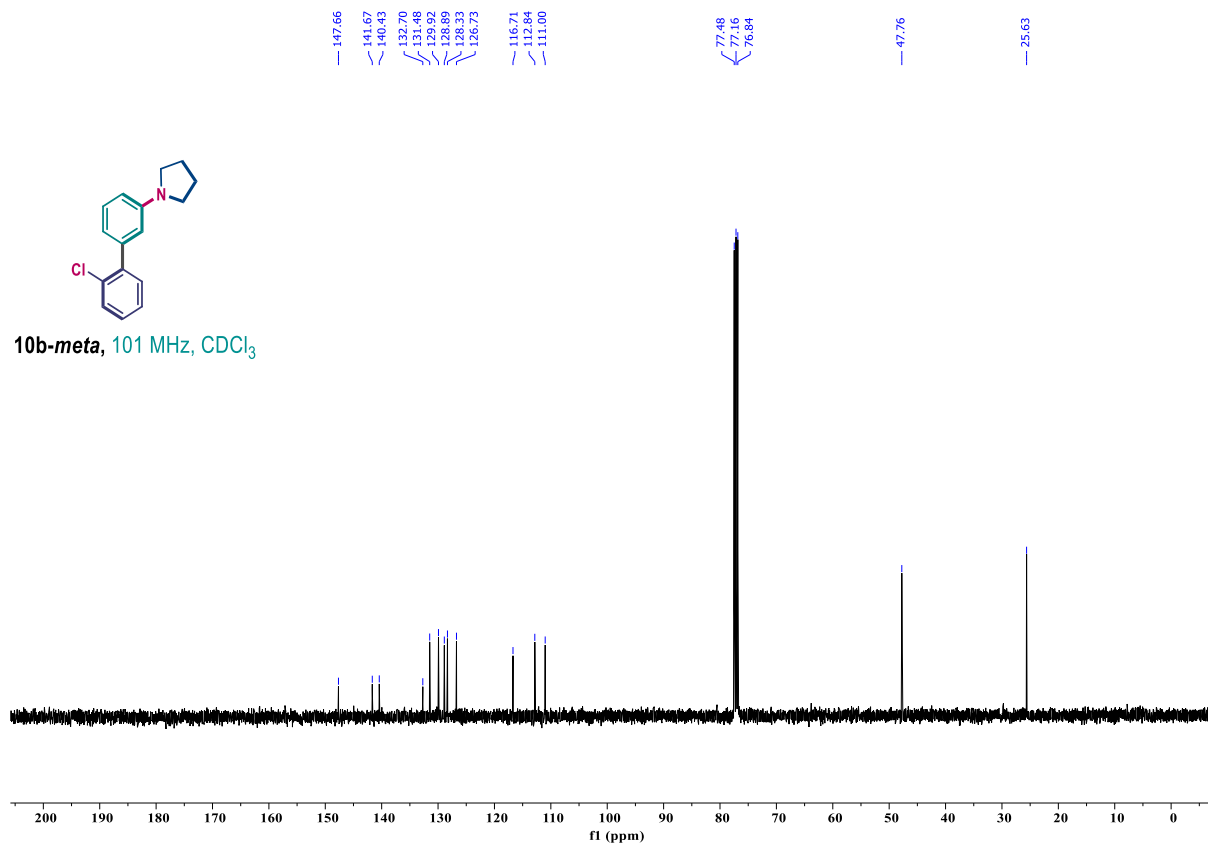

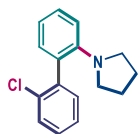

10b-ortho, 400 MHz, CDCl<sub>3</sub>

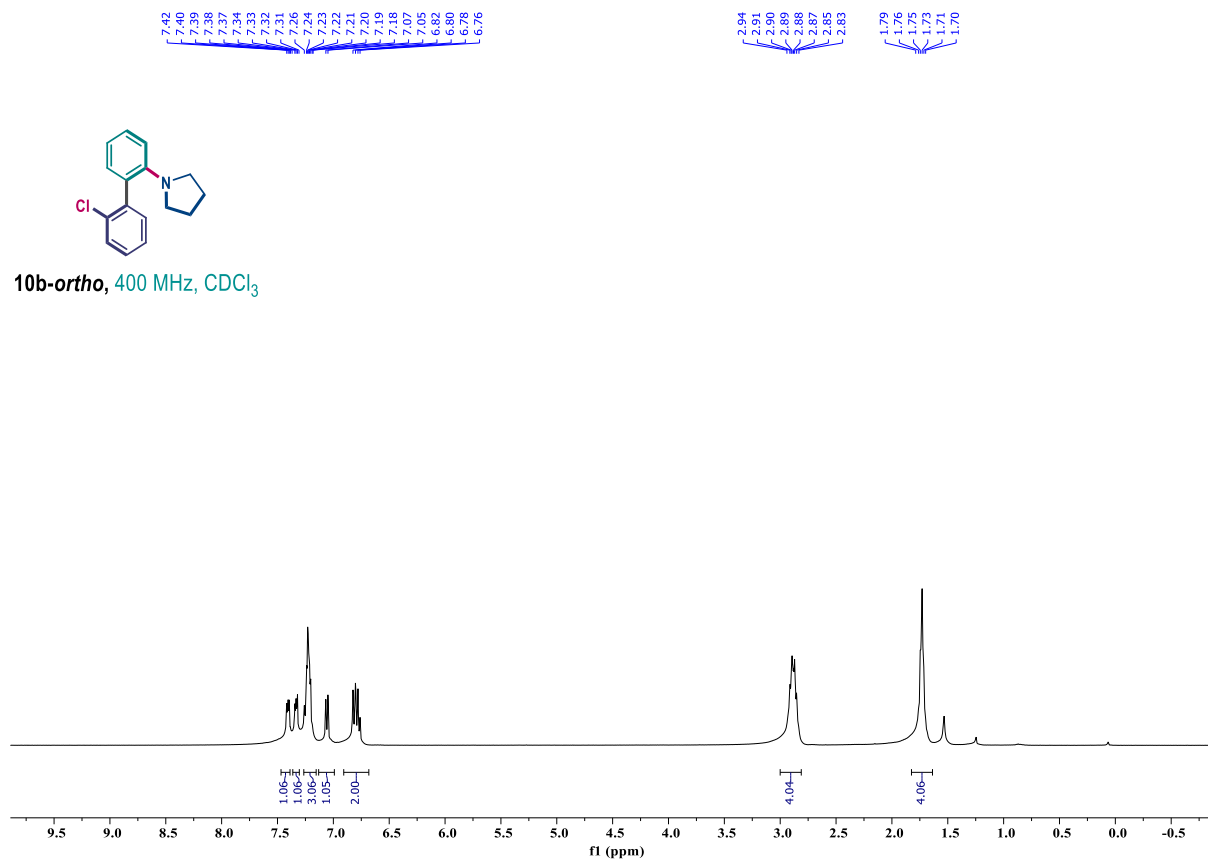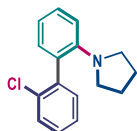

10b-ortho, 101 MHz, CDCl<sub>3</sub>

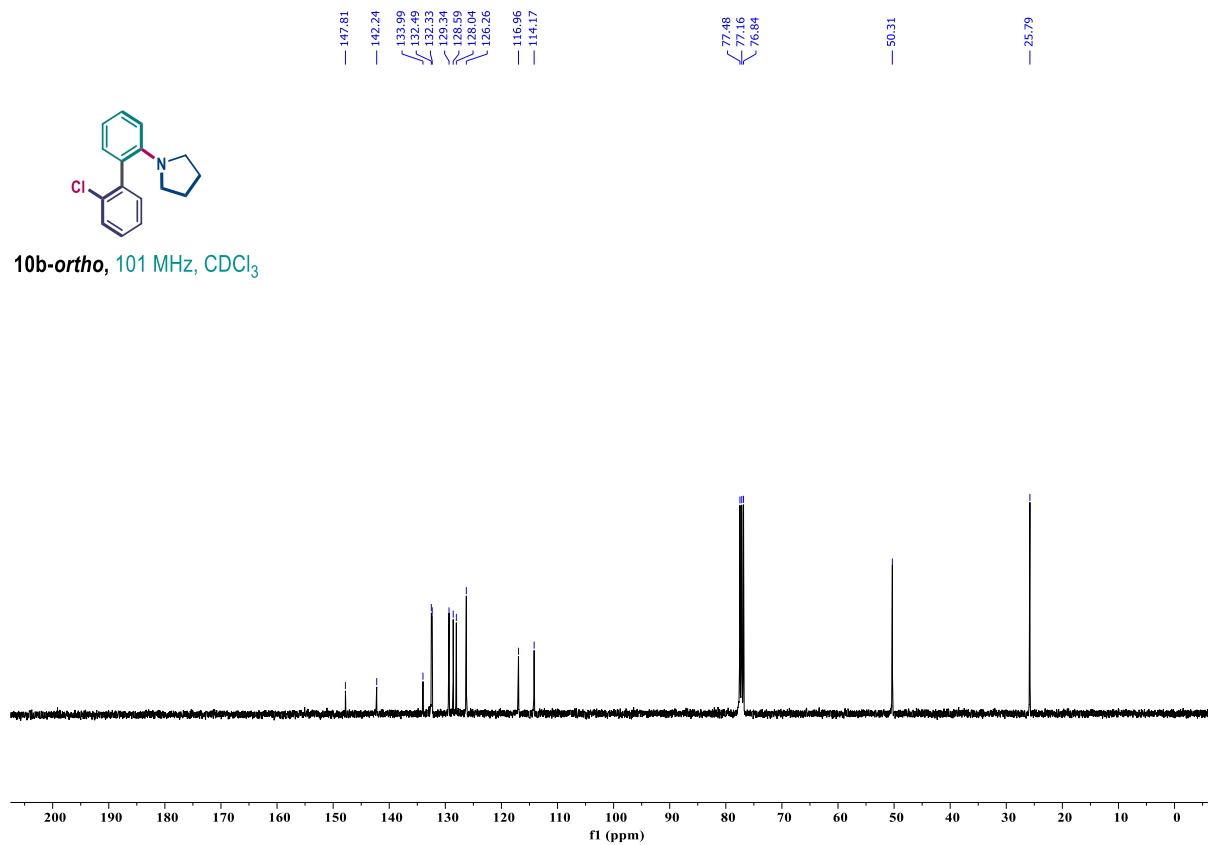

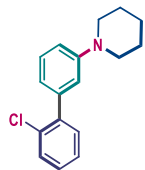

10c, 400 MHz, CDCl<sub>3</sub>

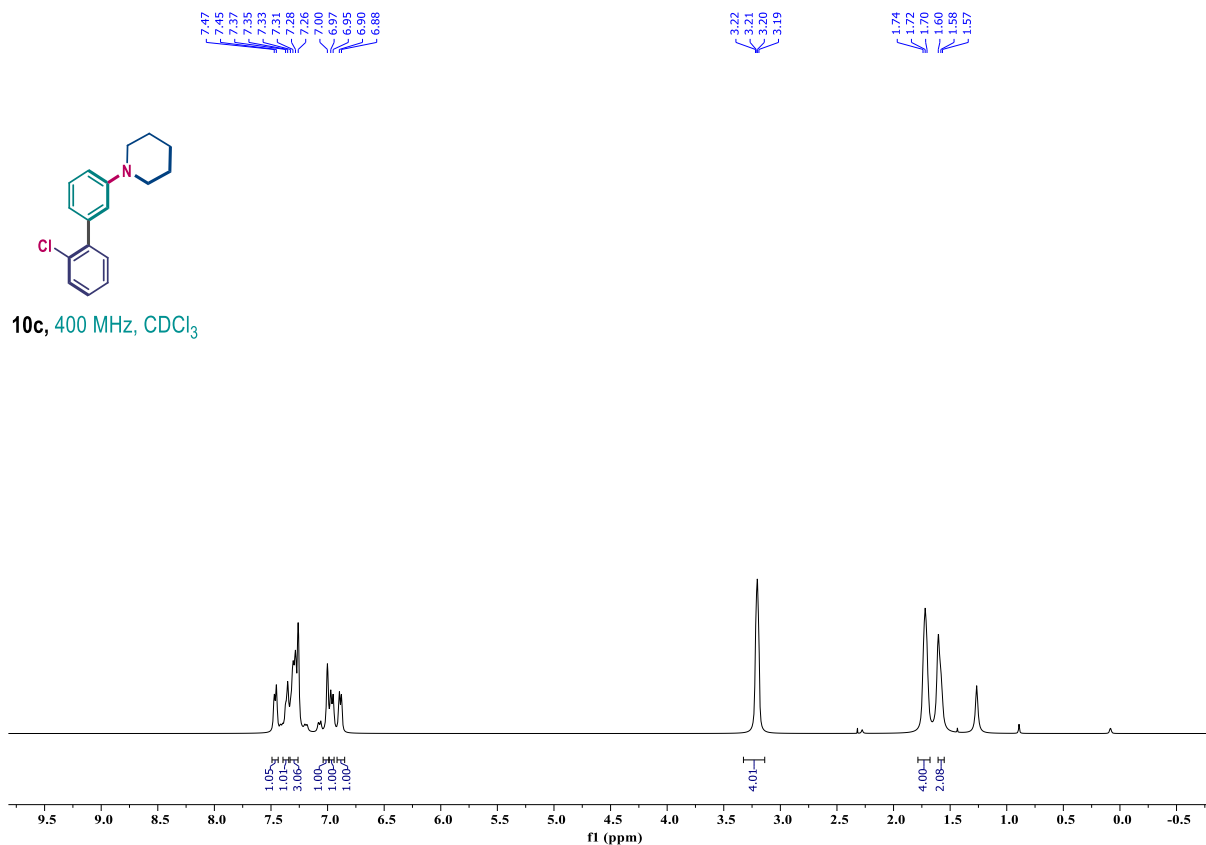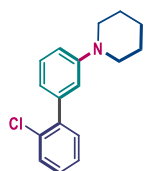

10c, 101 MHz, CDCl<sub>3</sub>

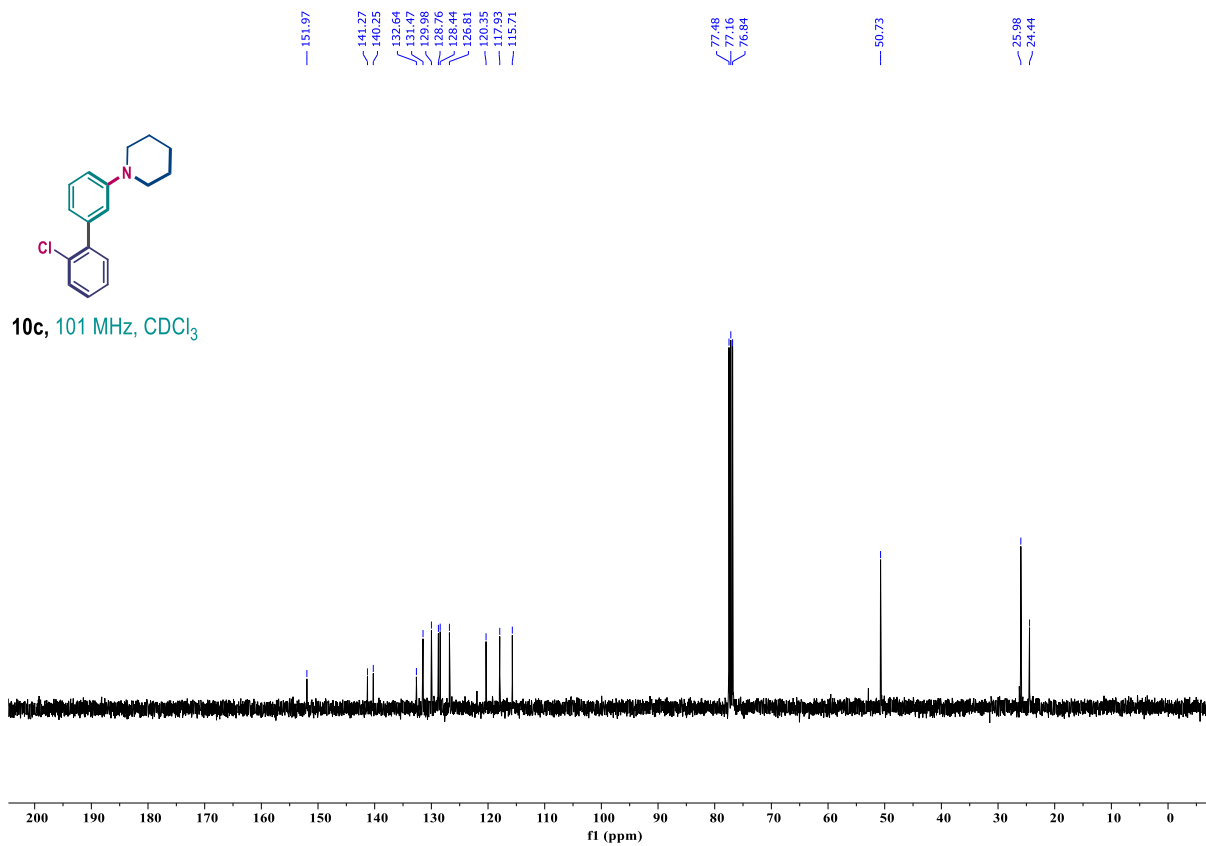

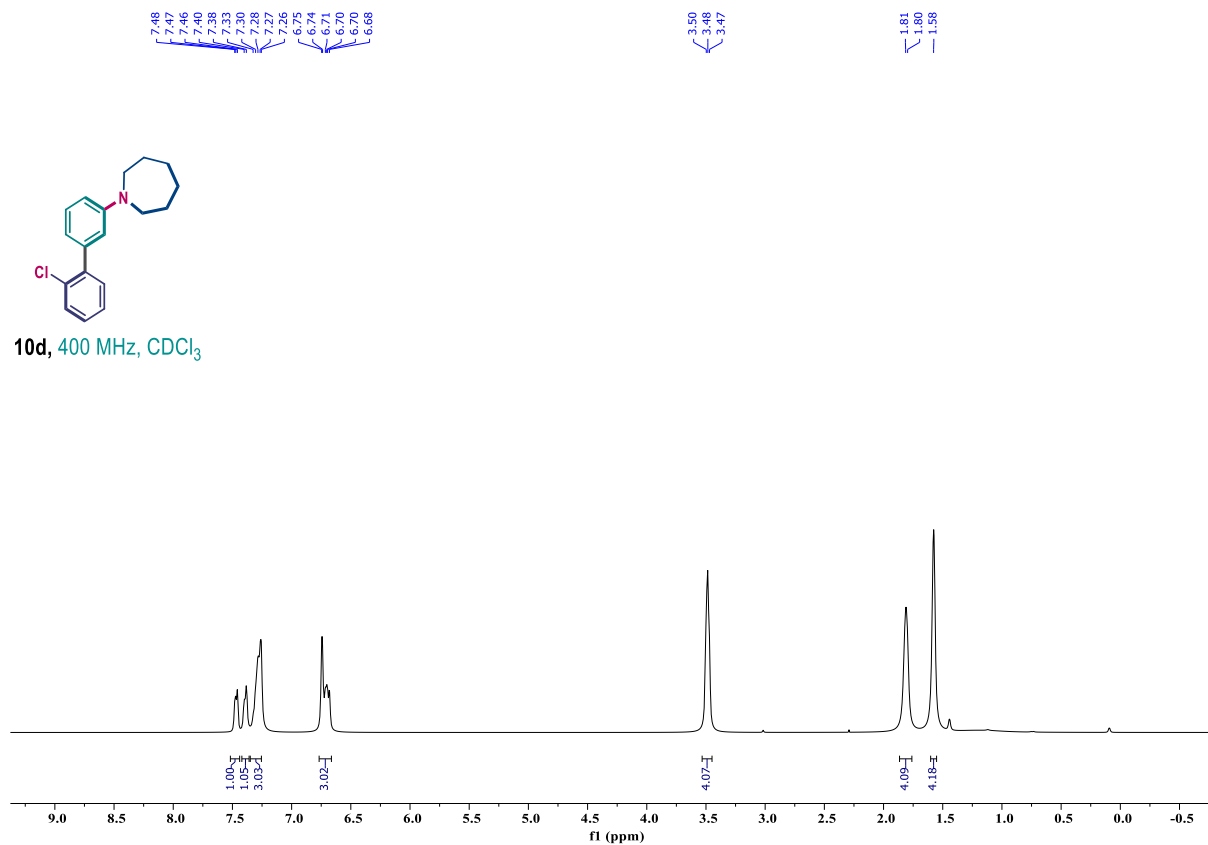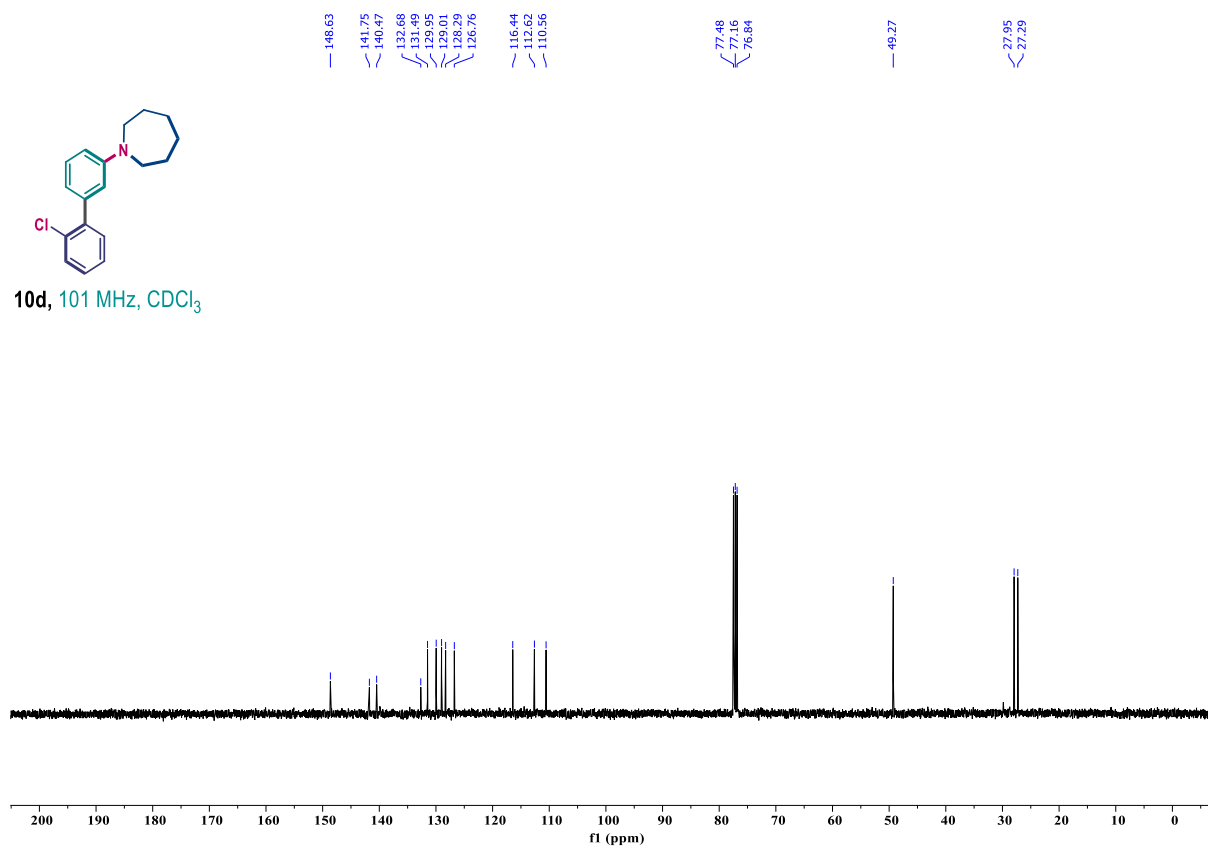

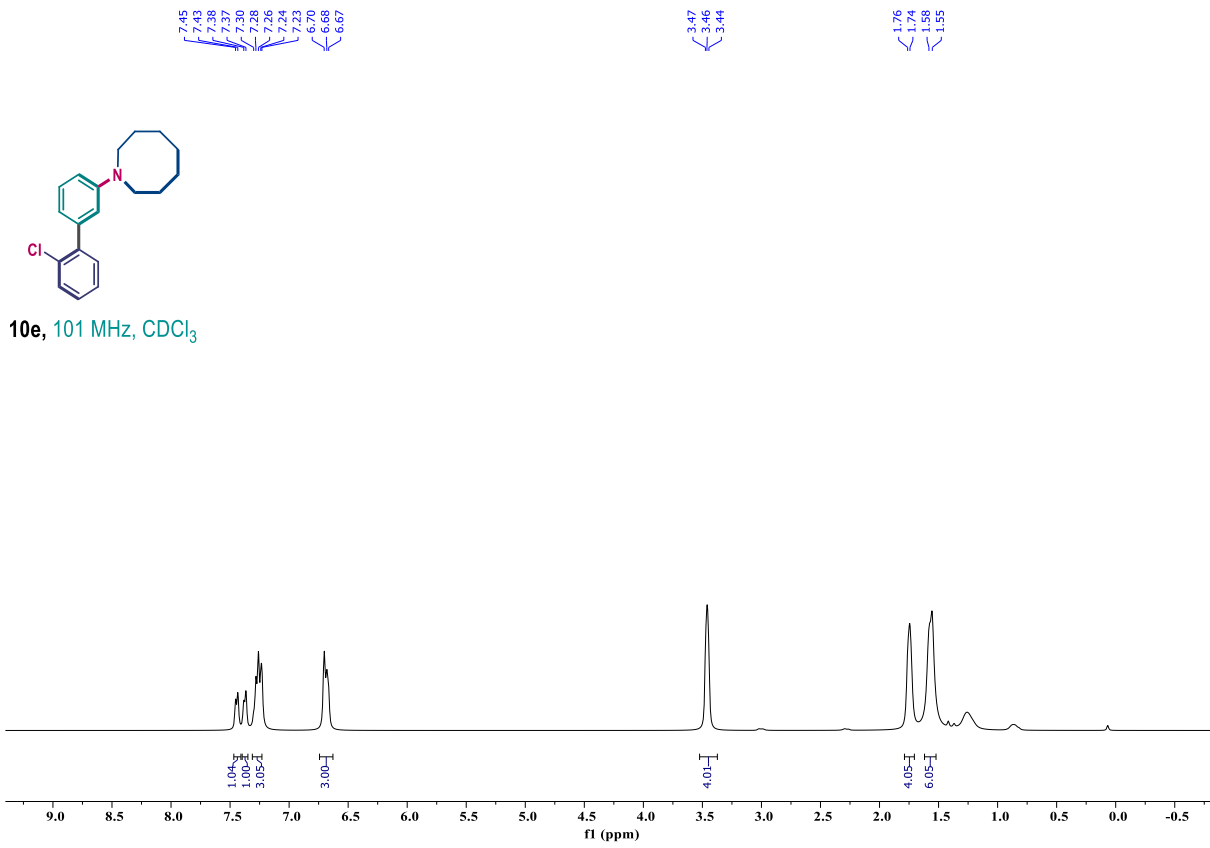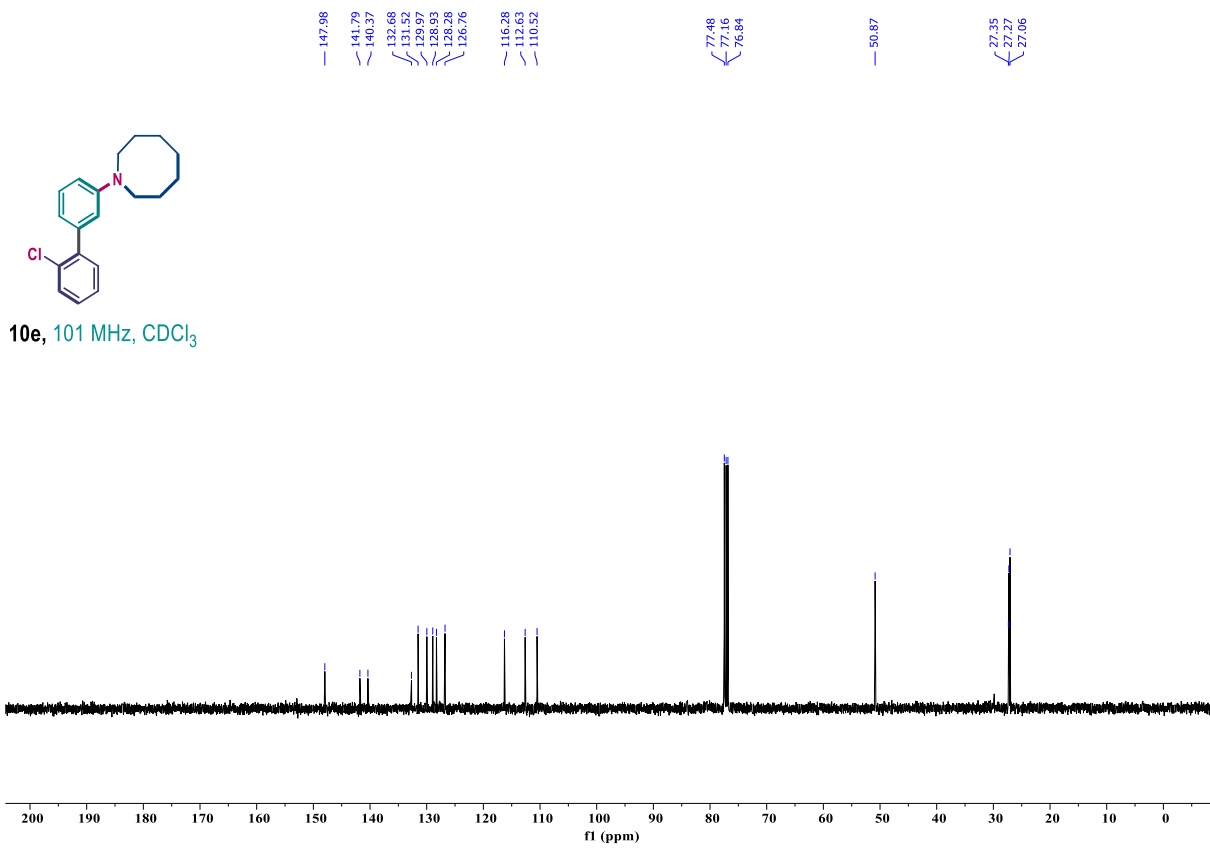

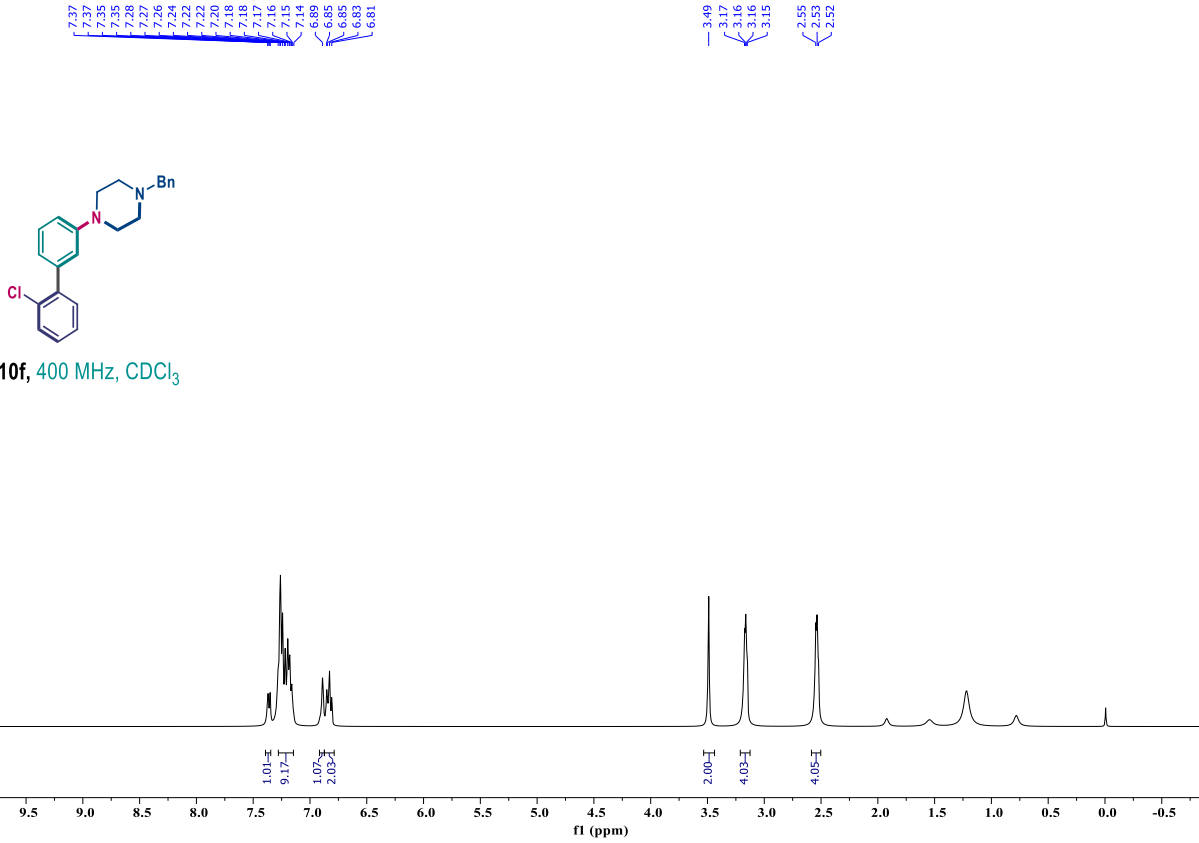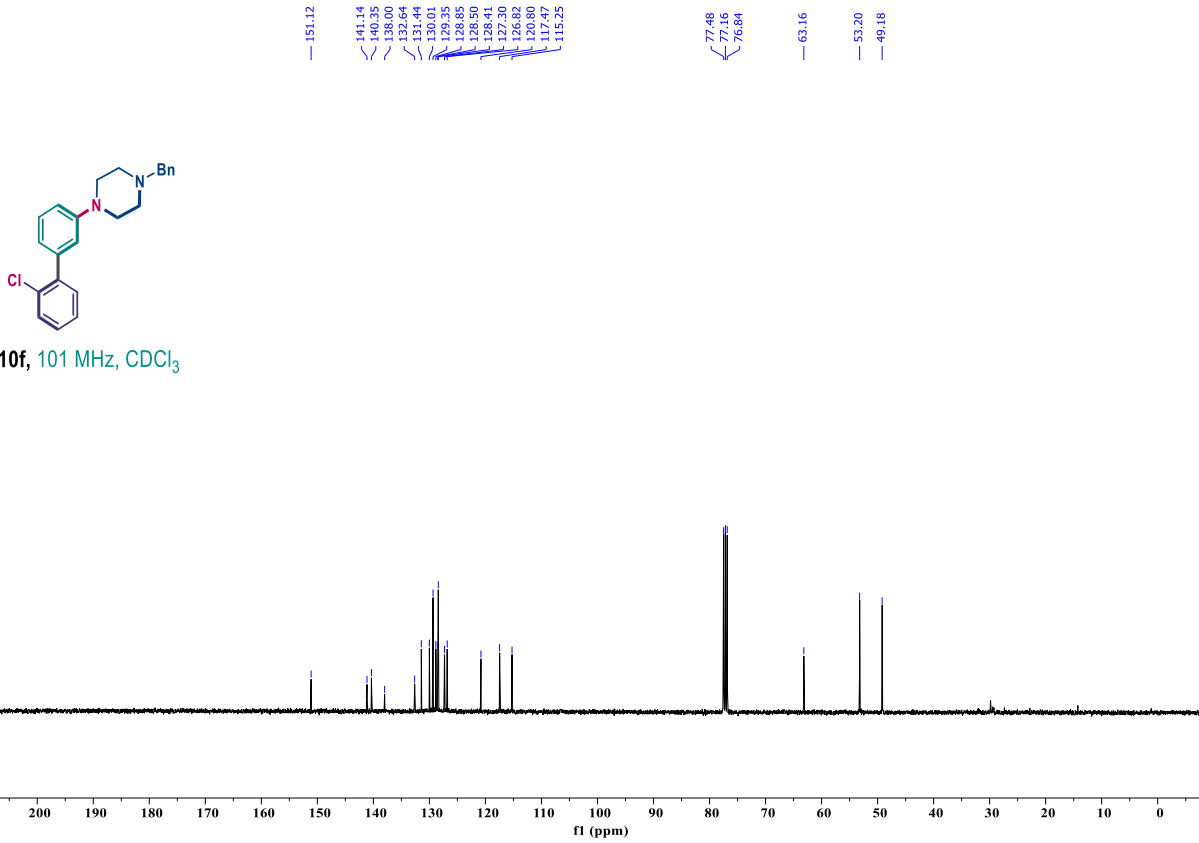



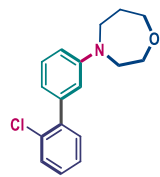

10g, 400 MHz, CDCl<sub>3</sub>

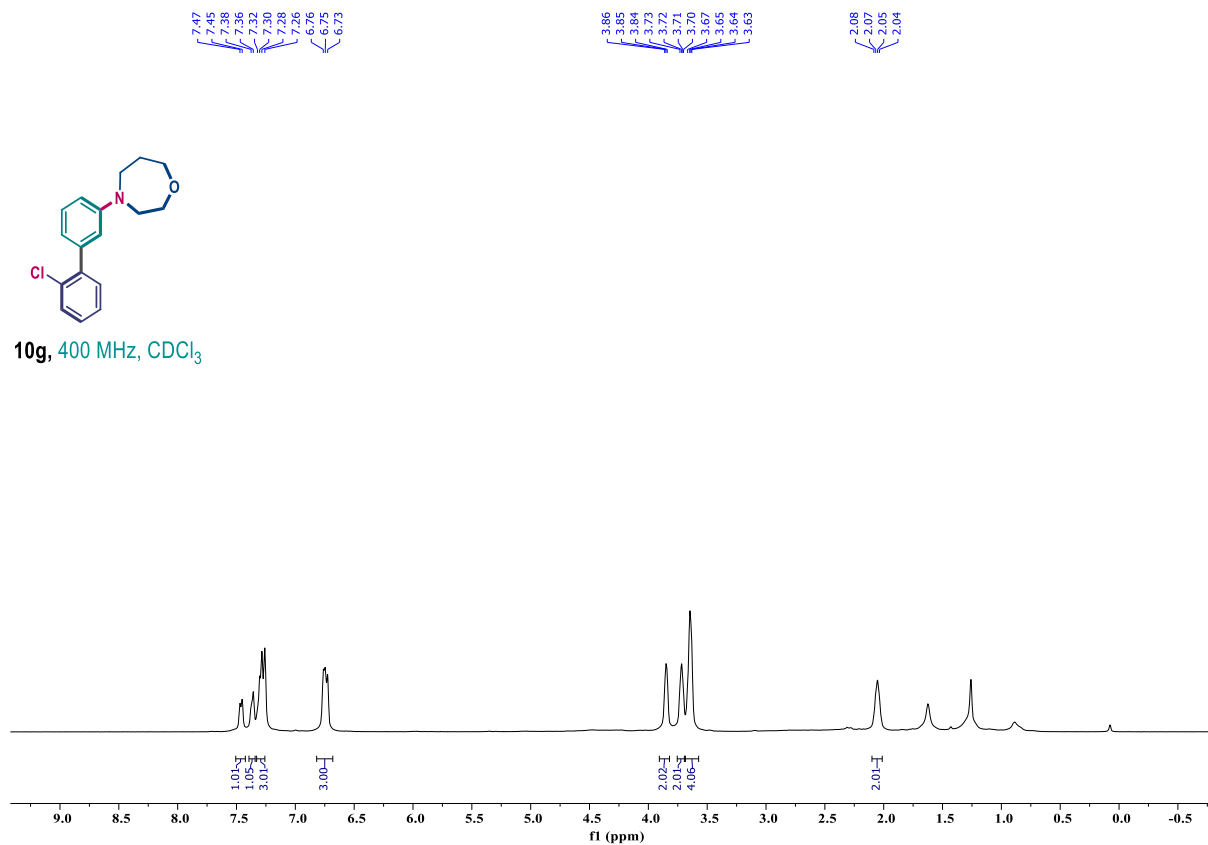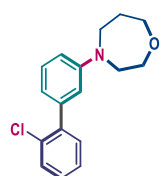

10g, 101 MHz, CDCl<sub>3</sub>

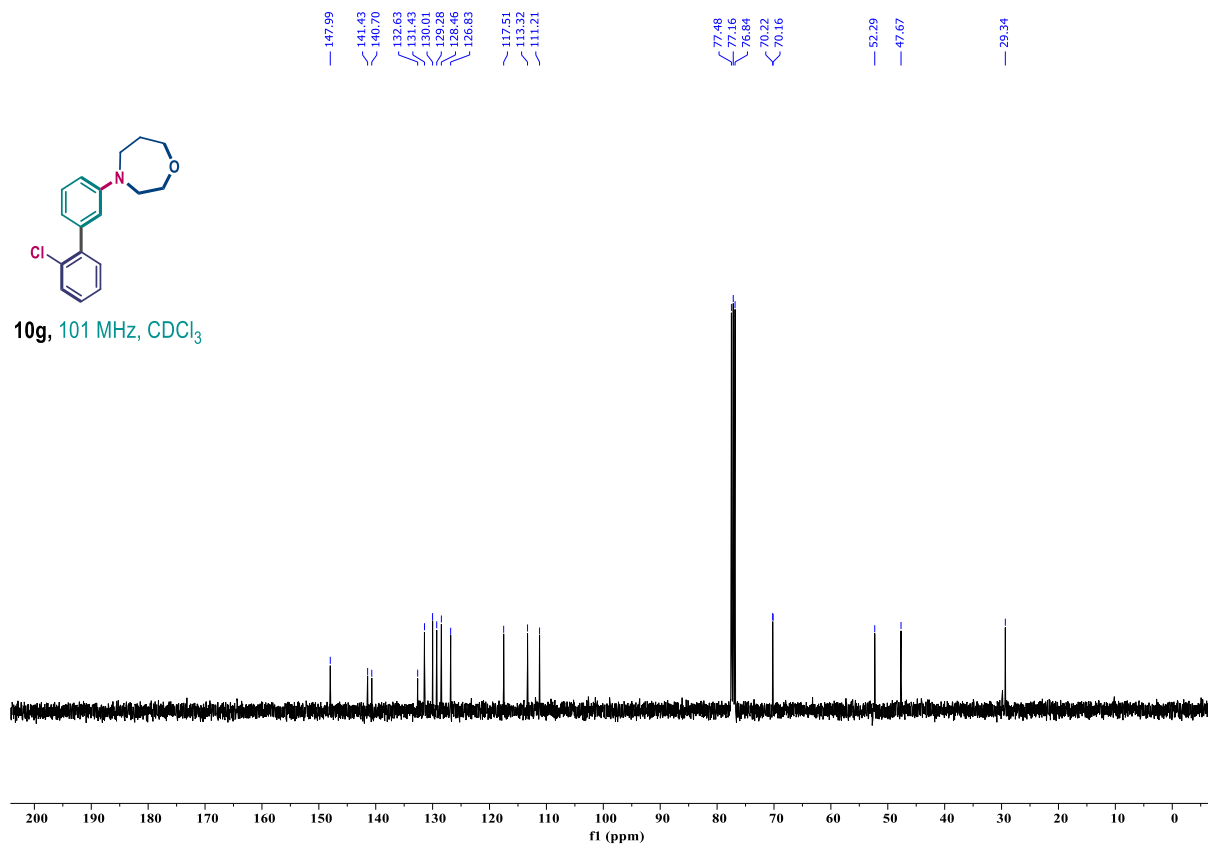

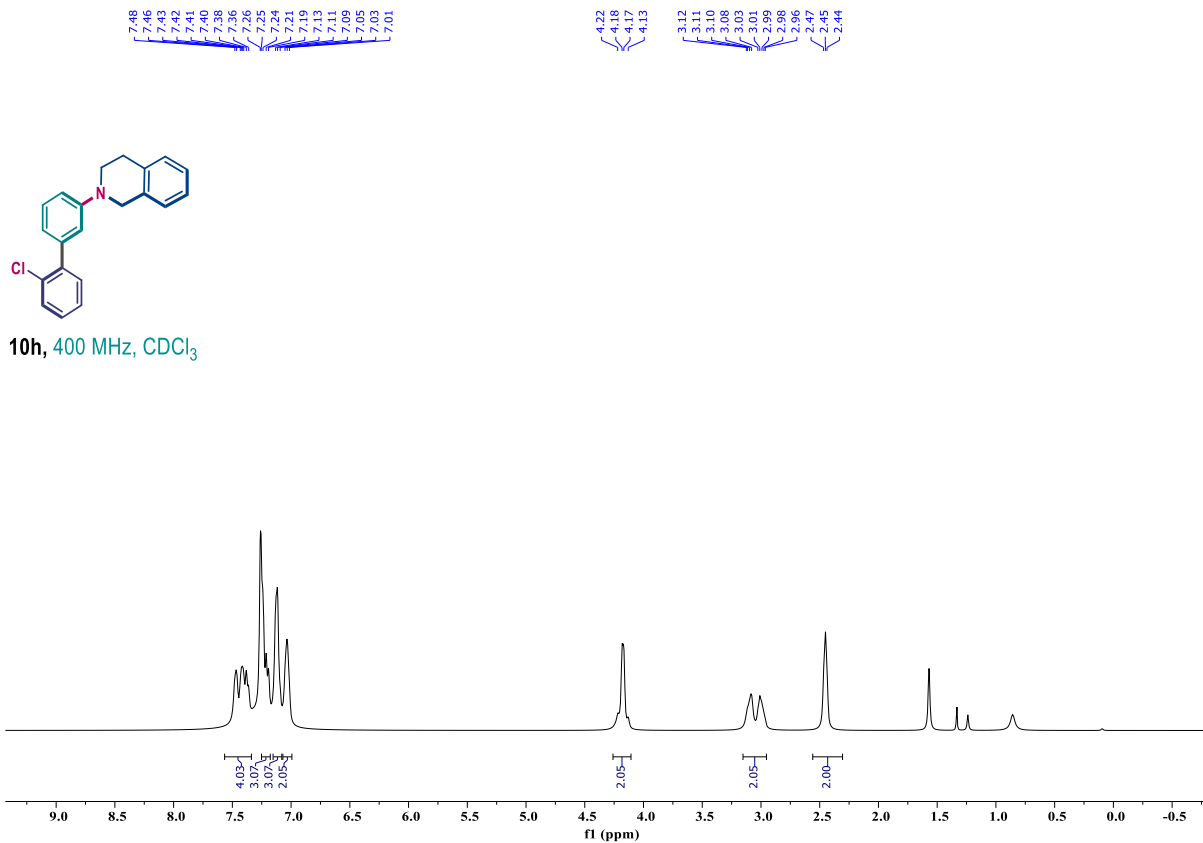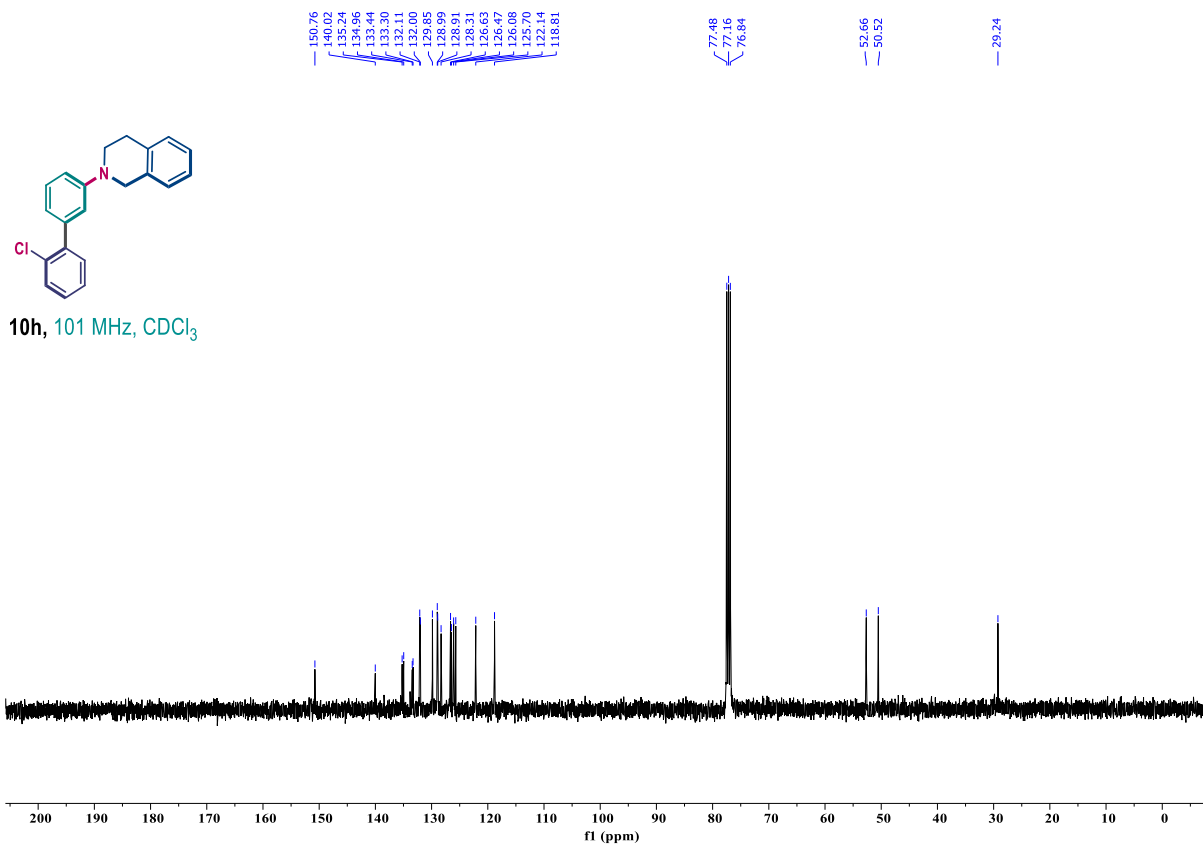

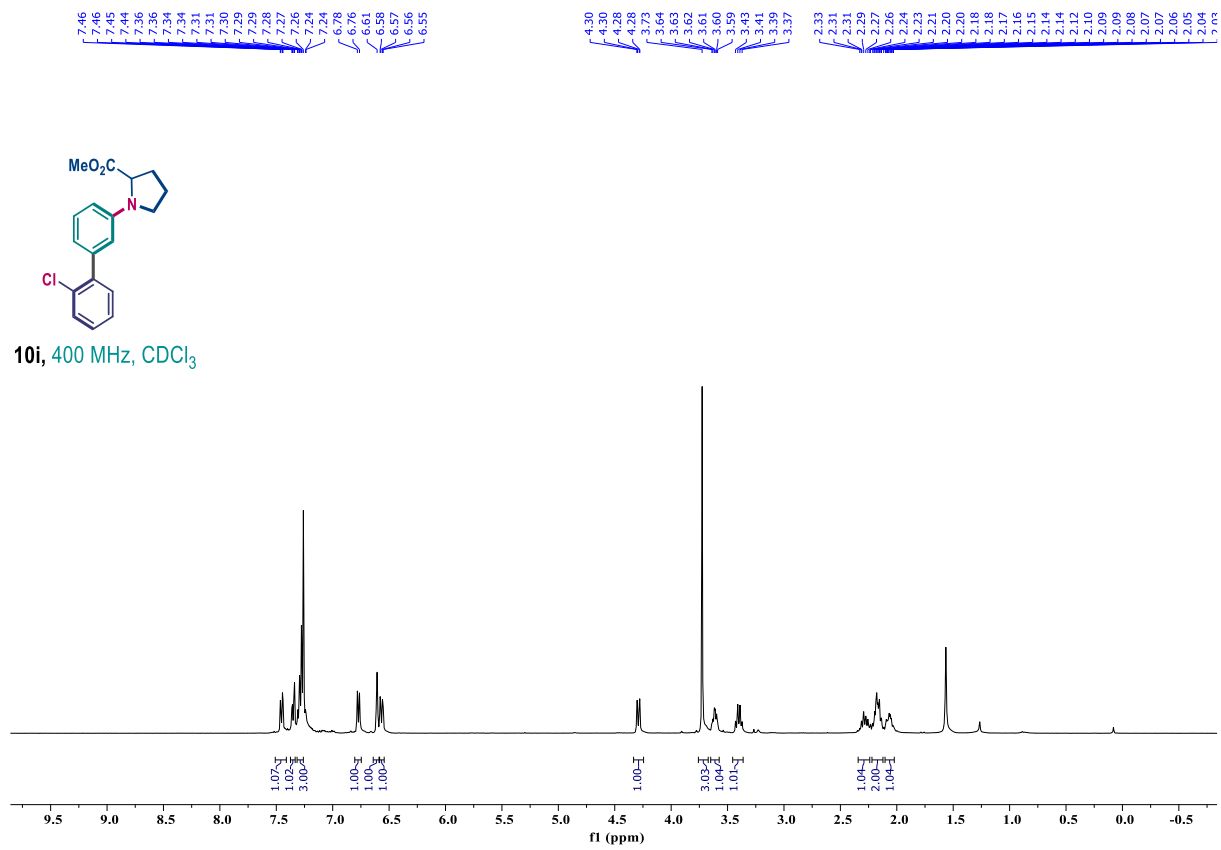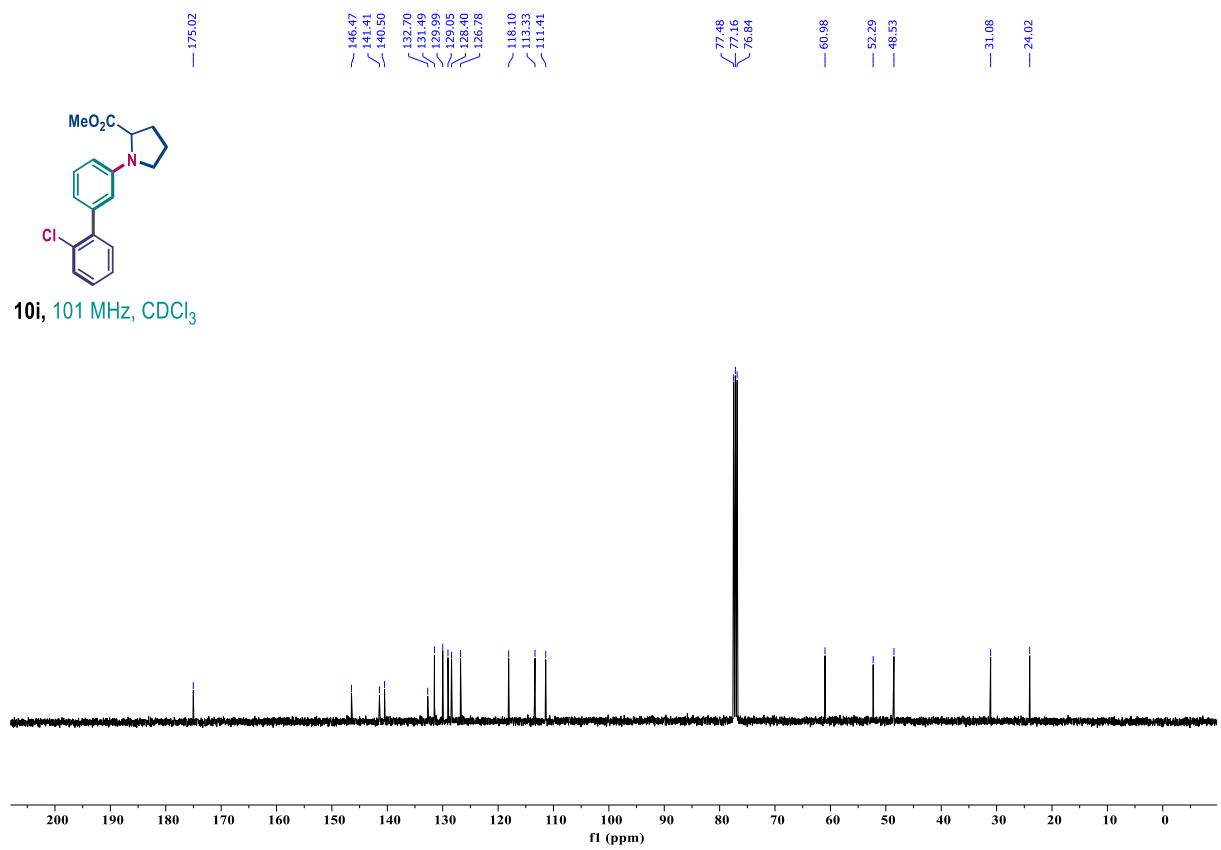

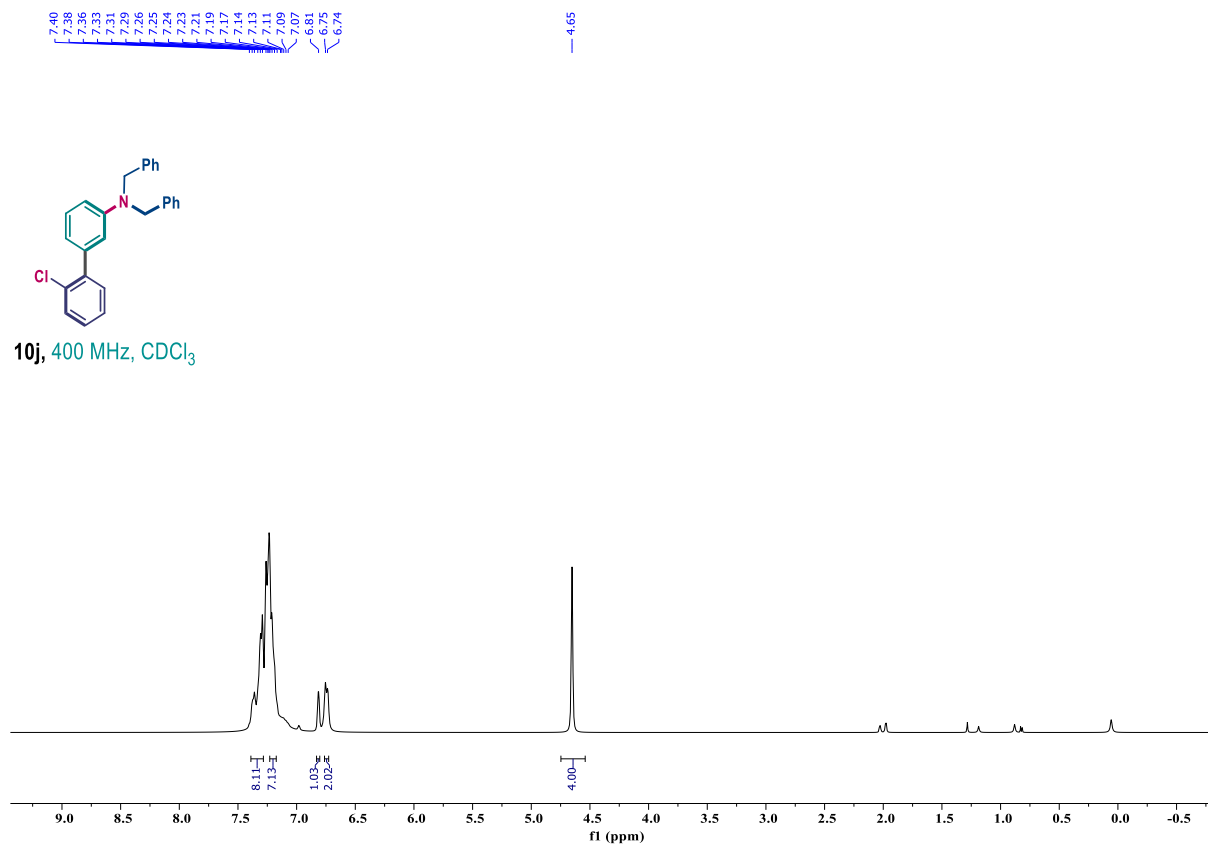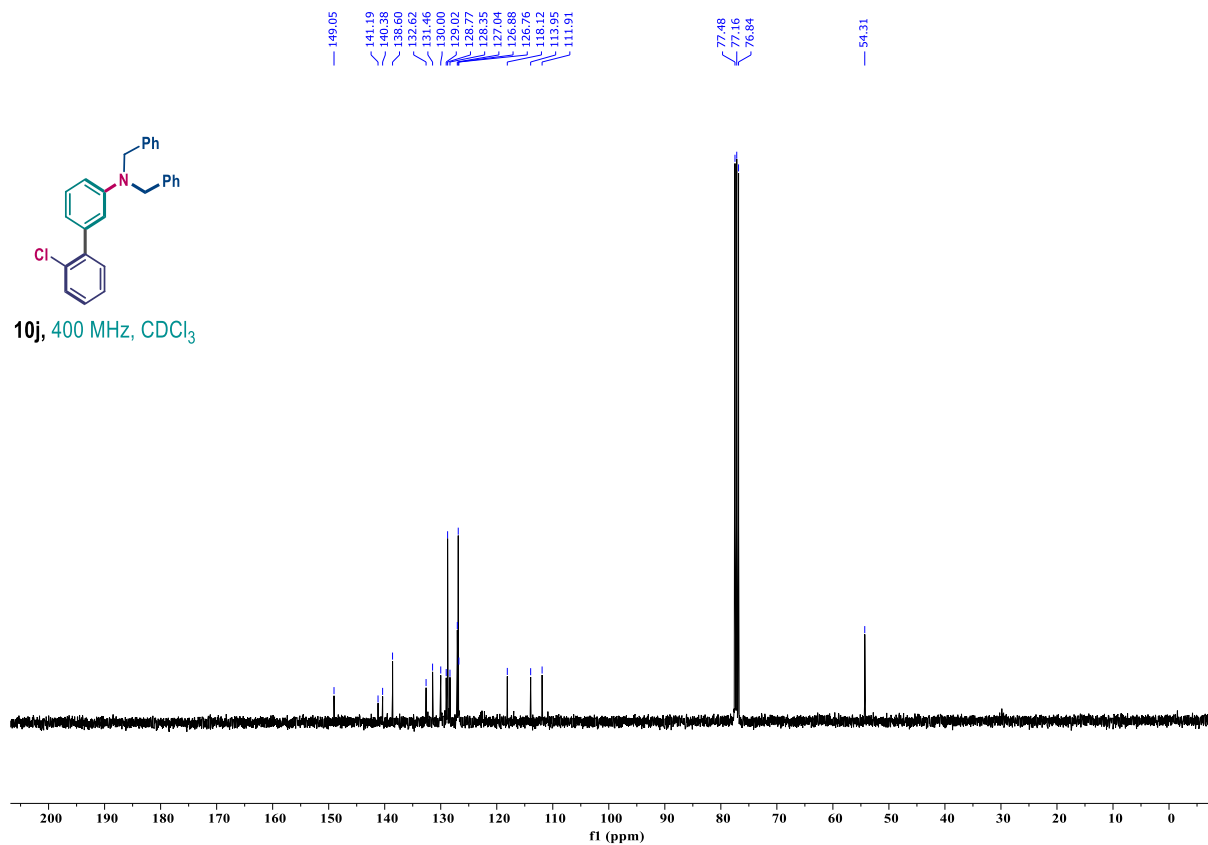

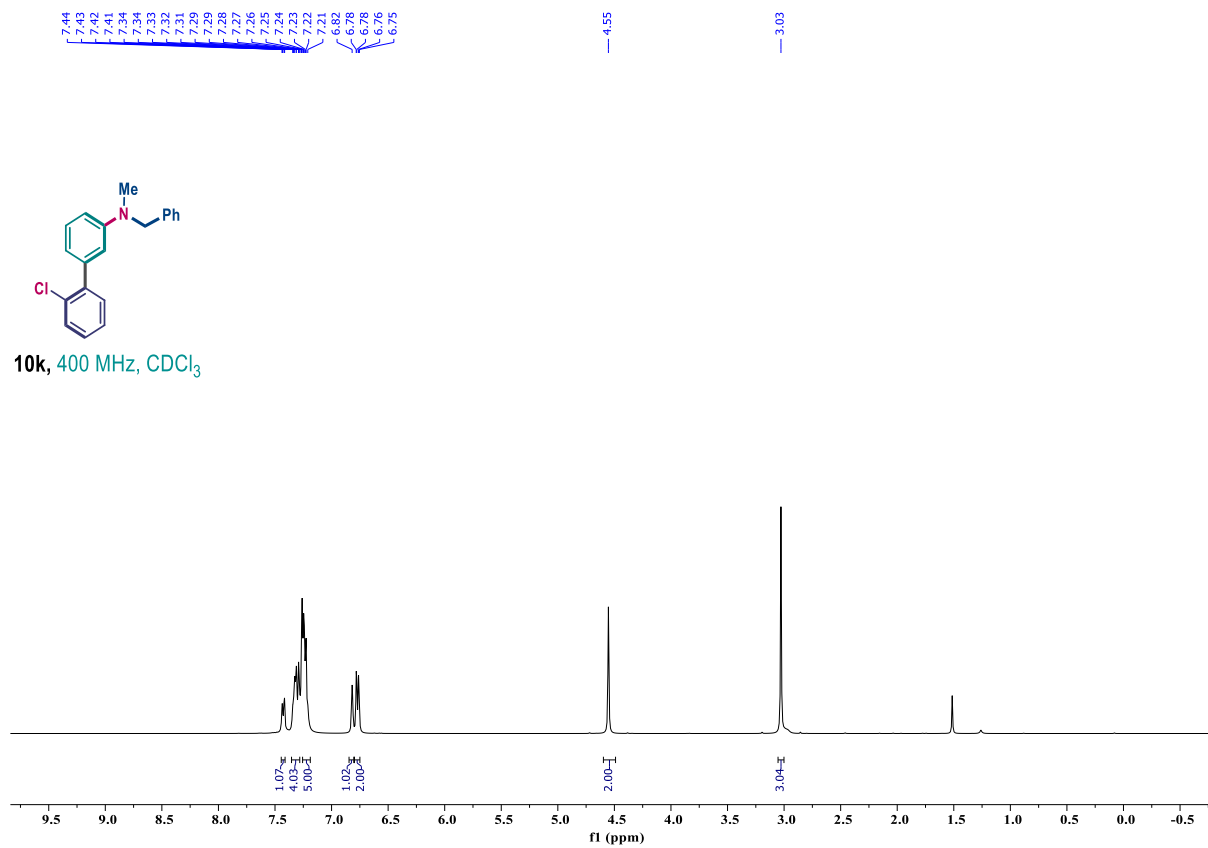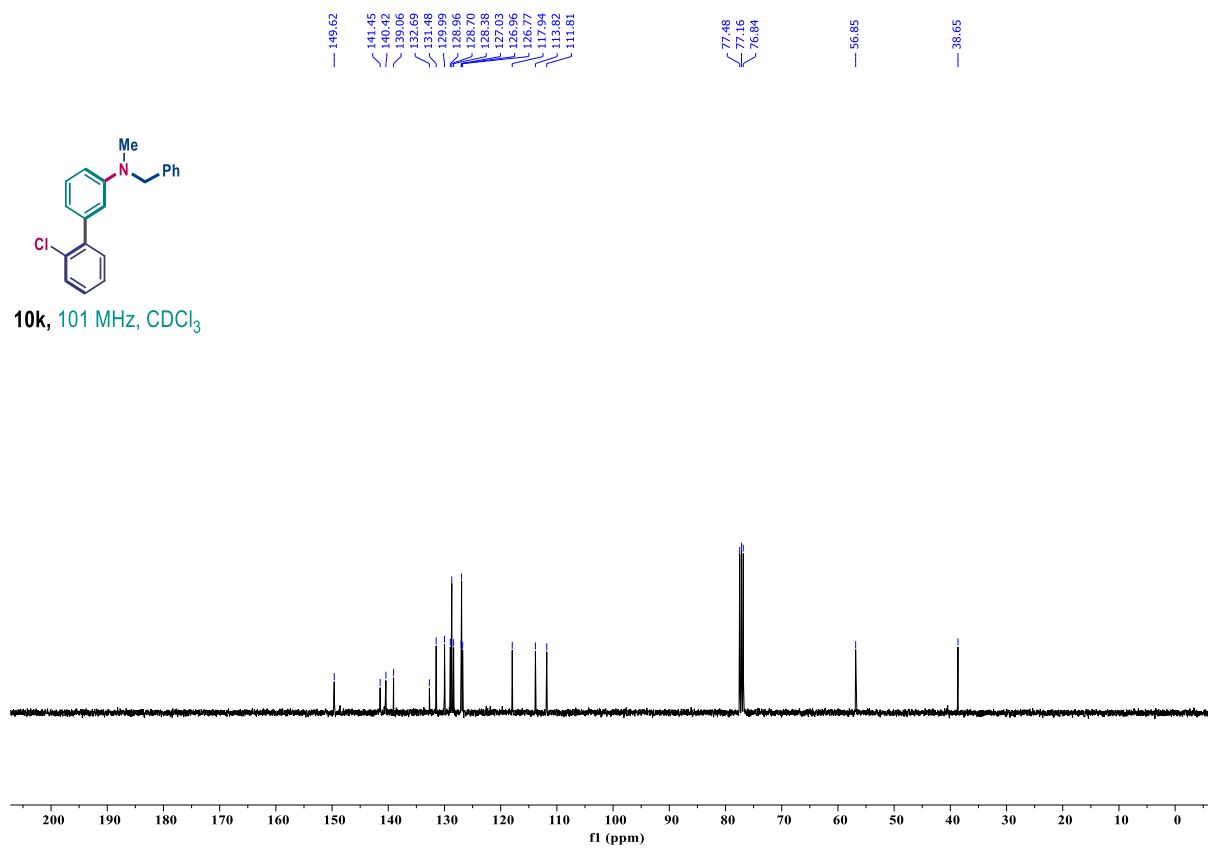

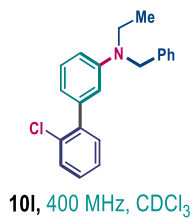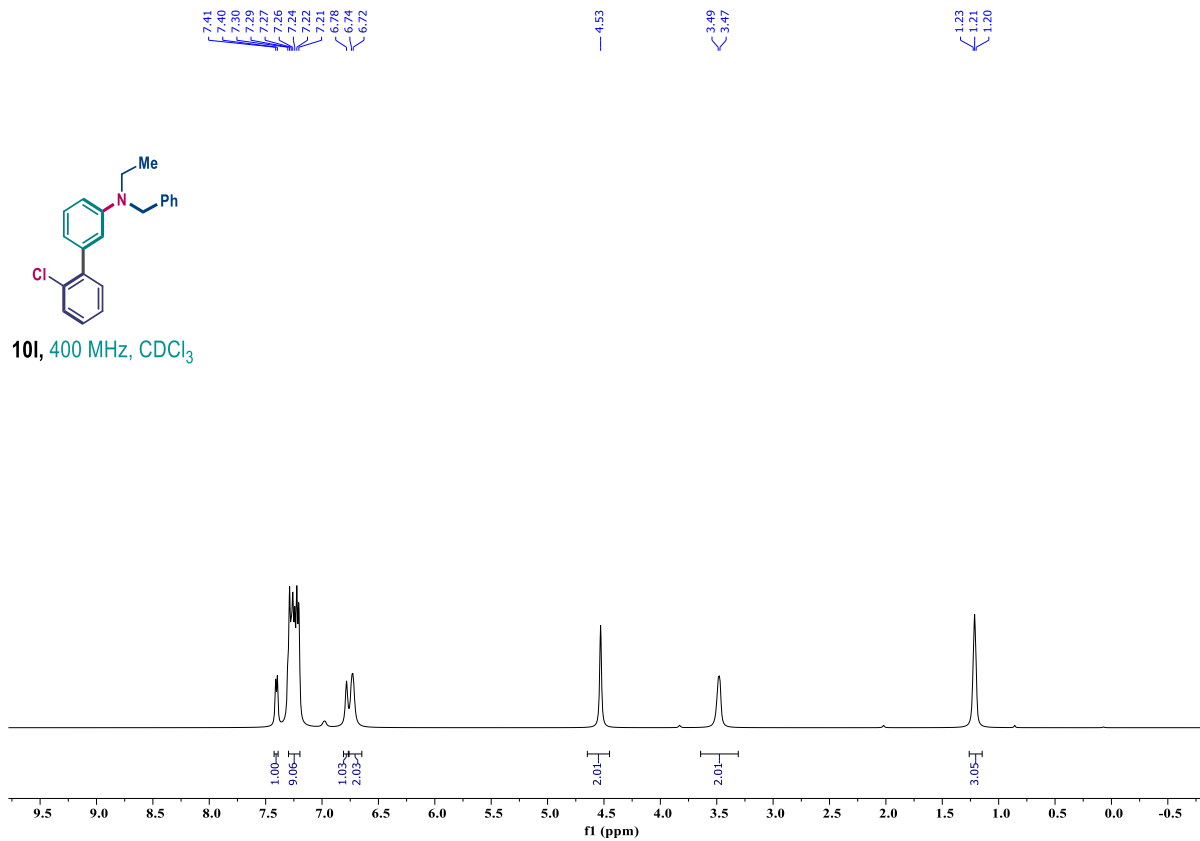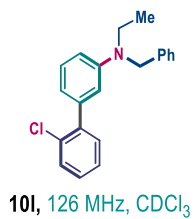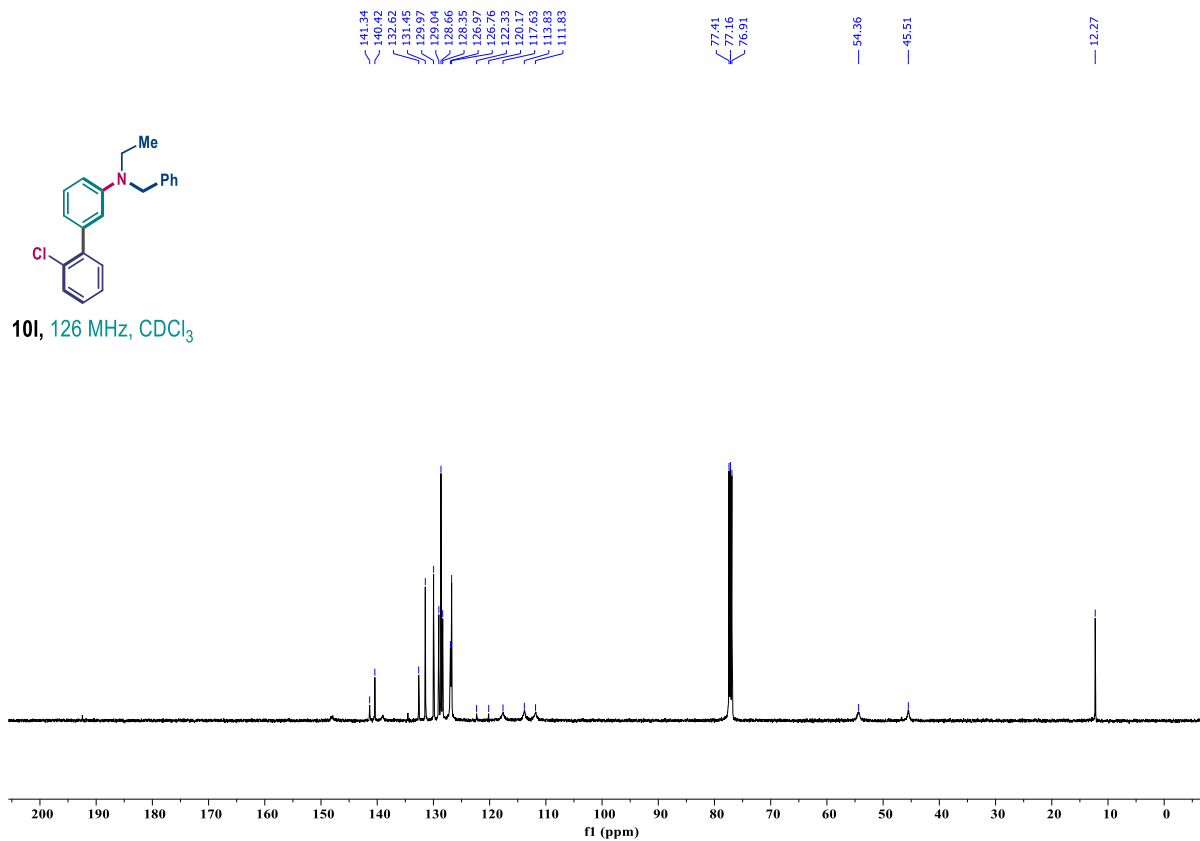

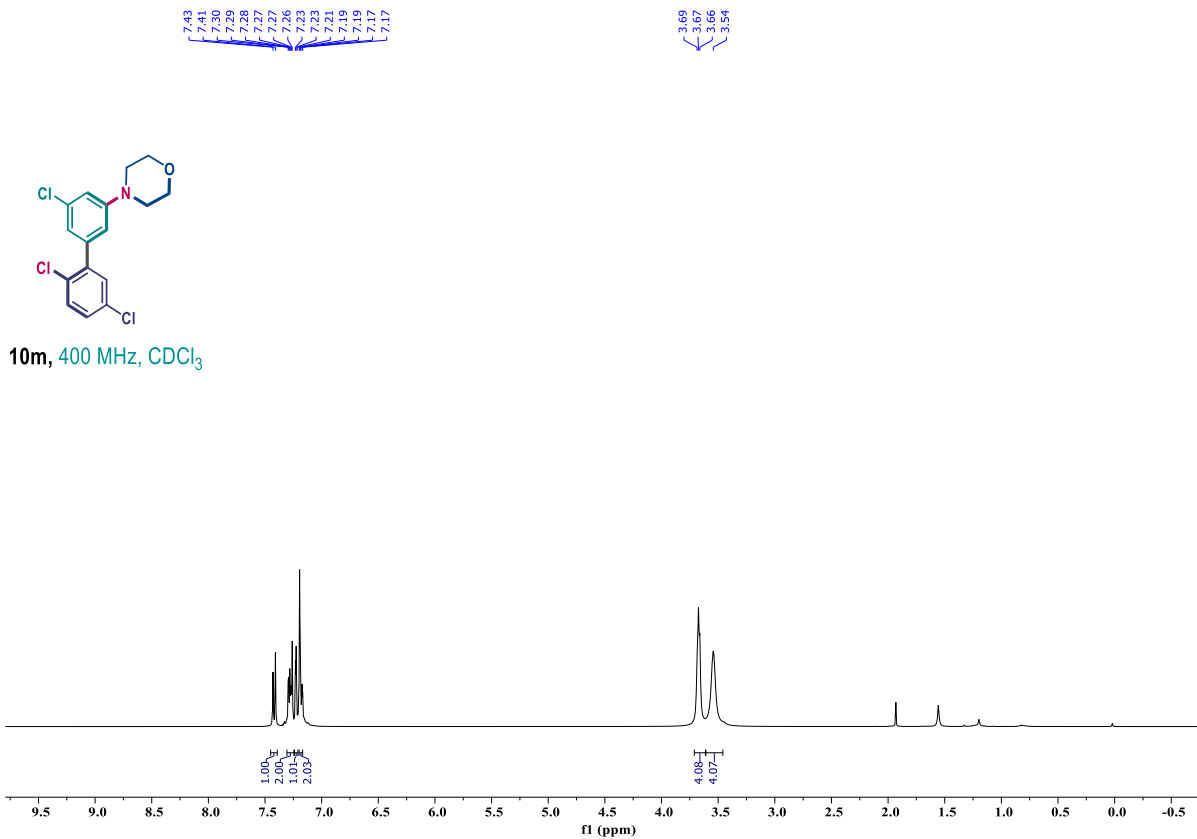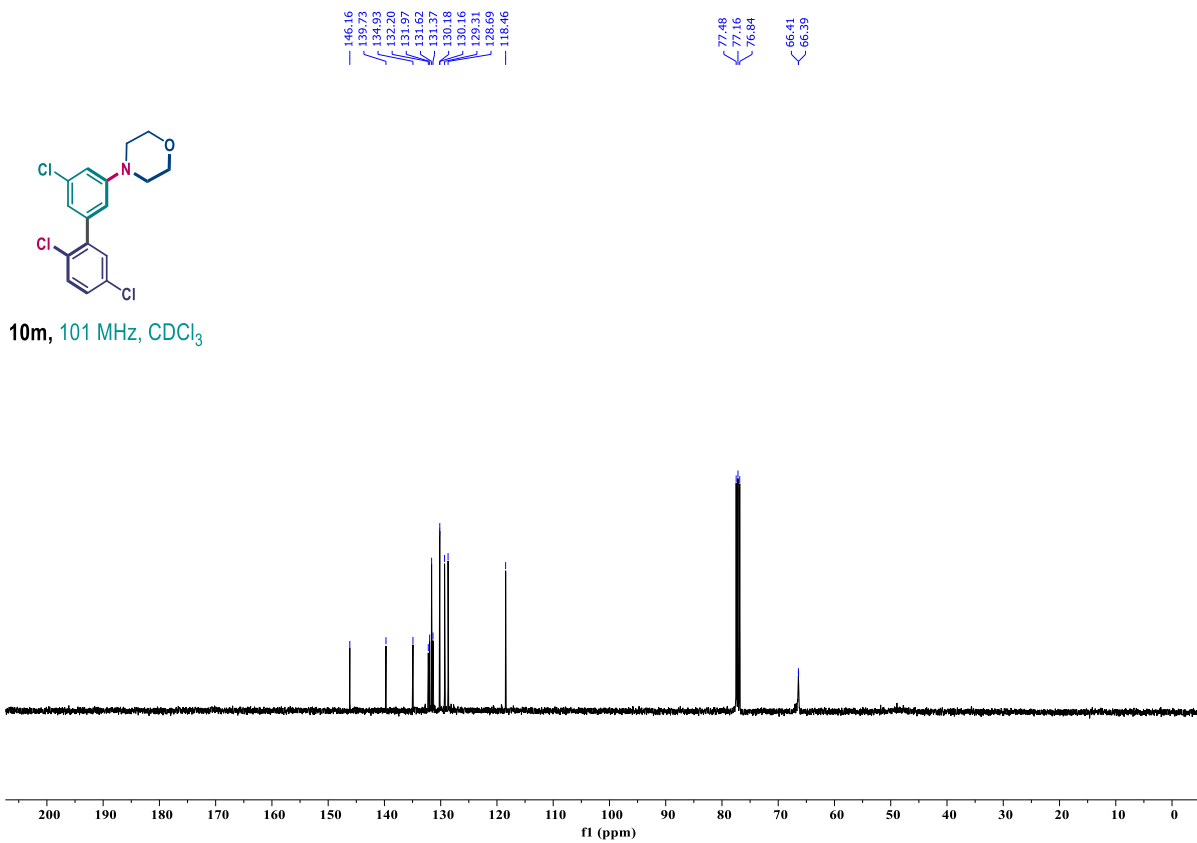

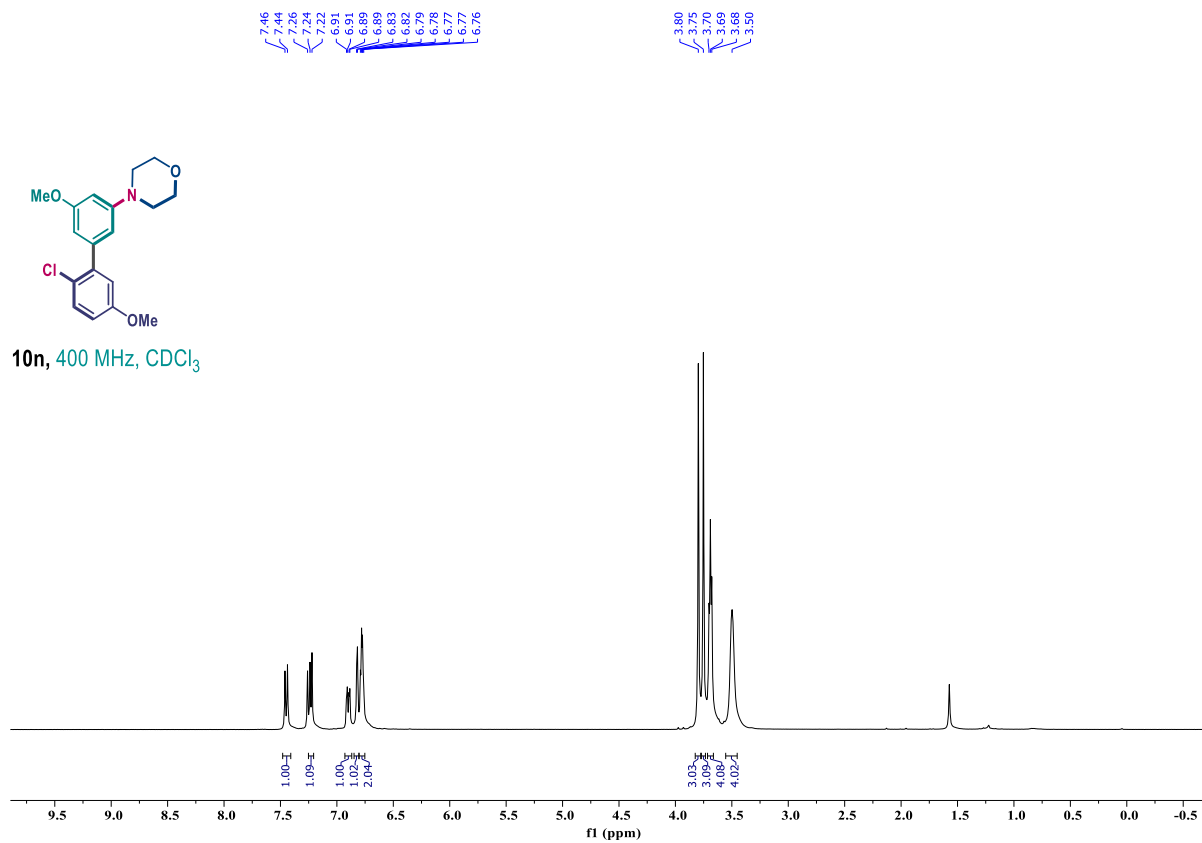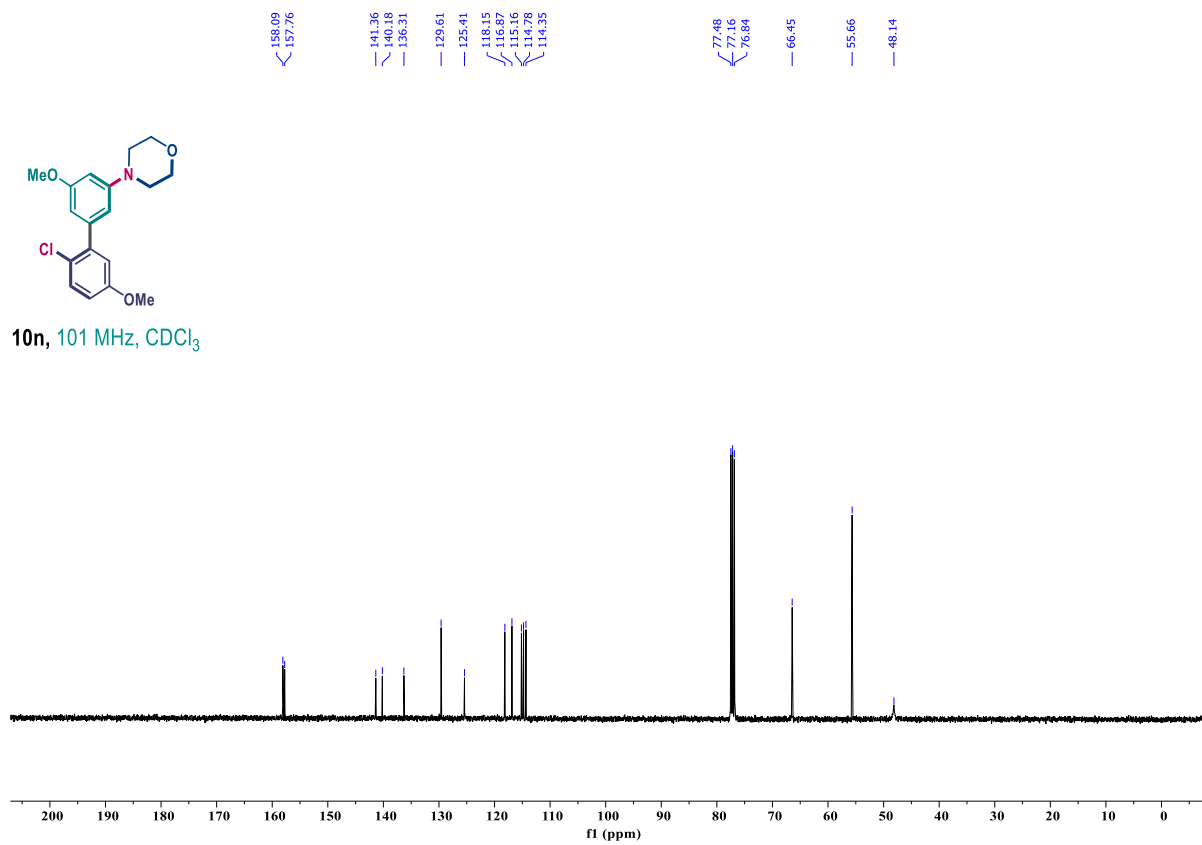



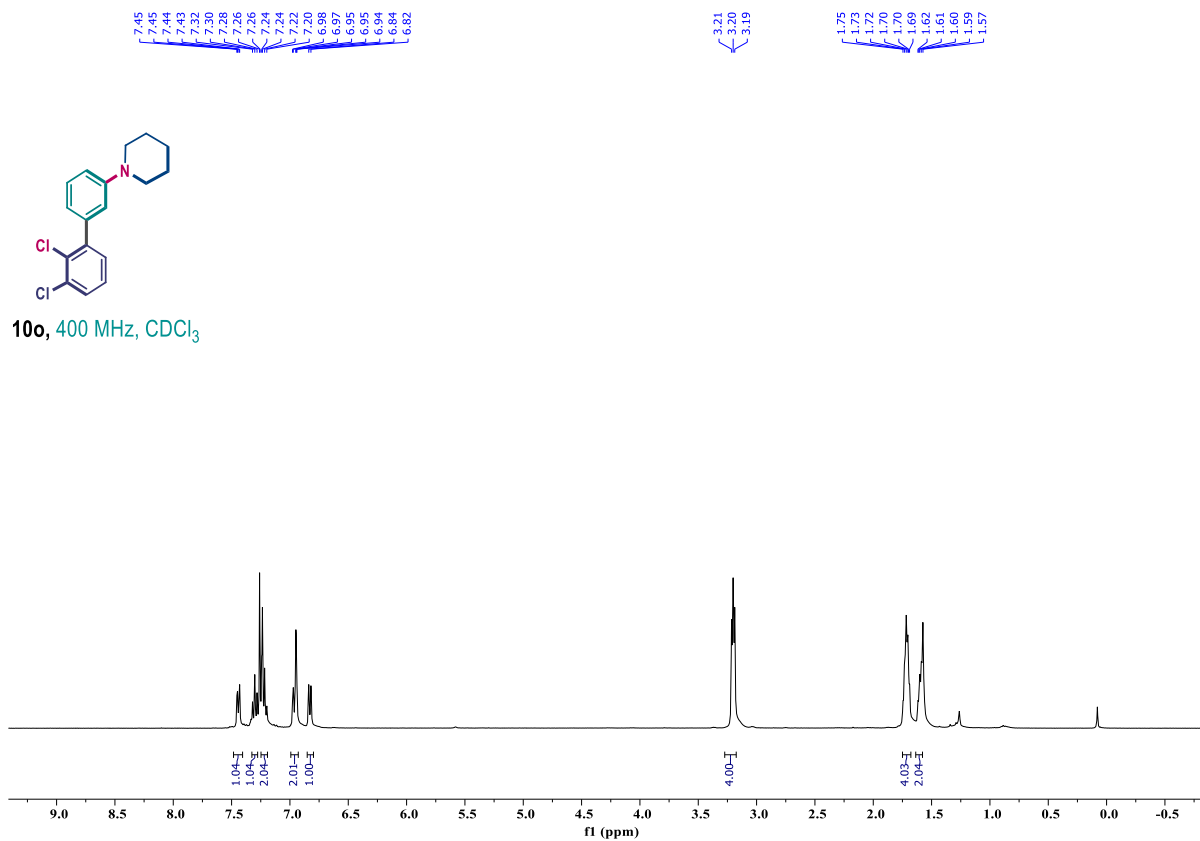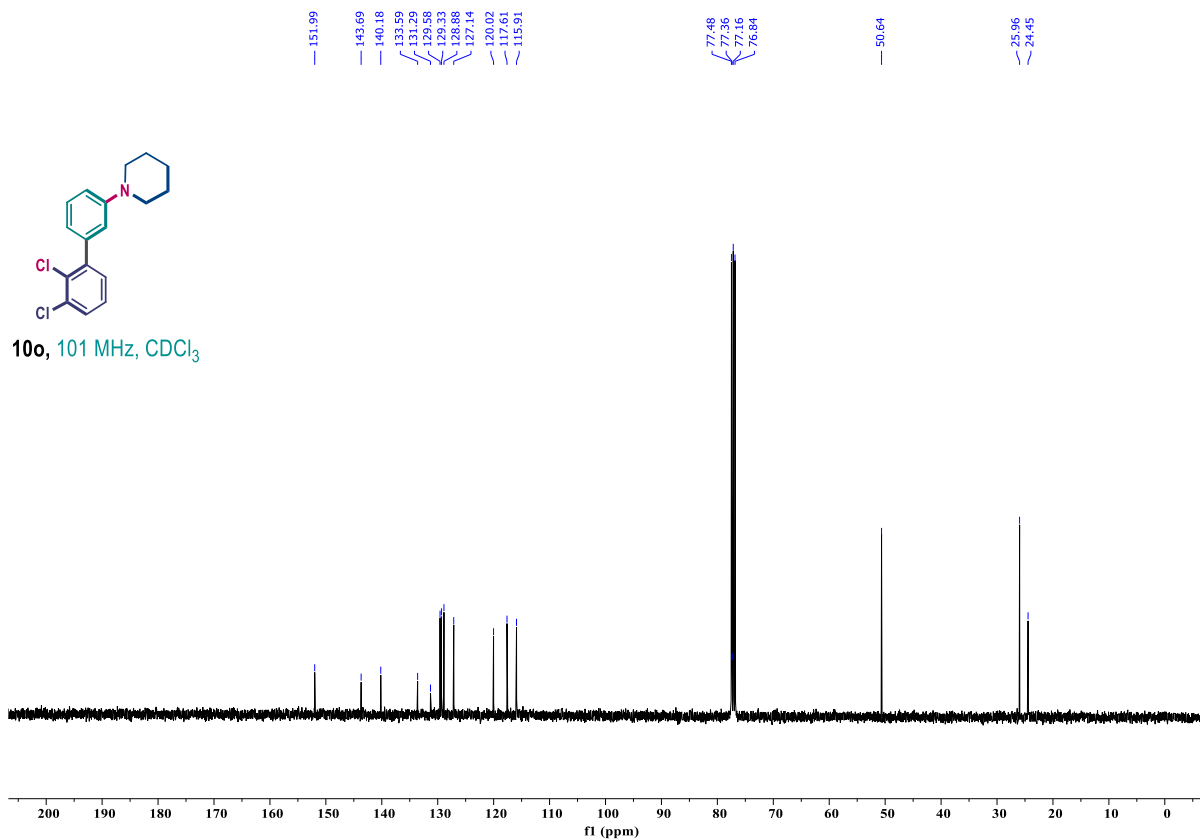

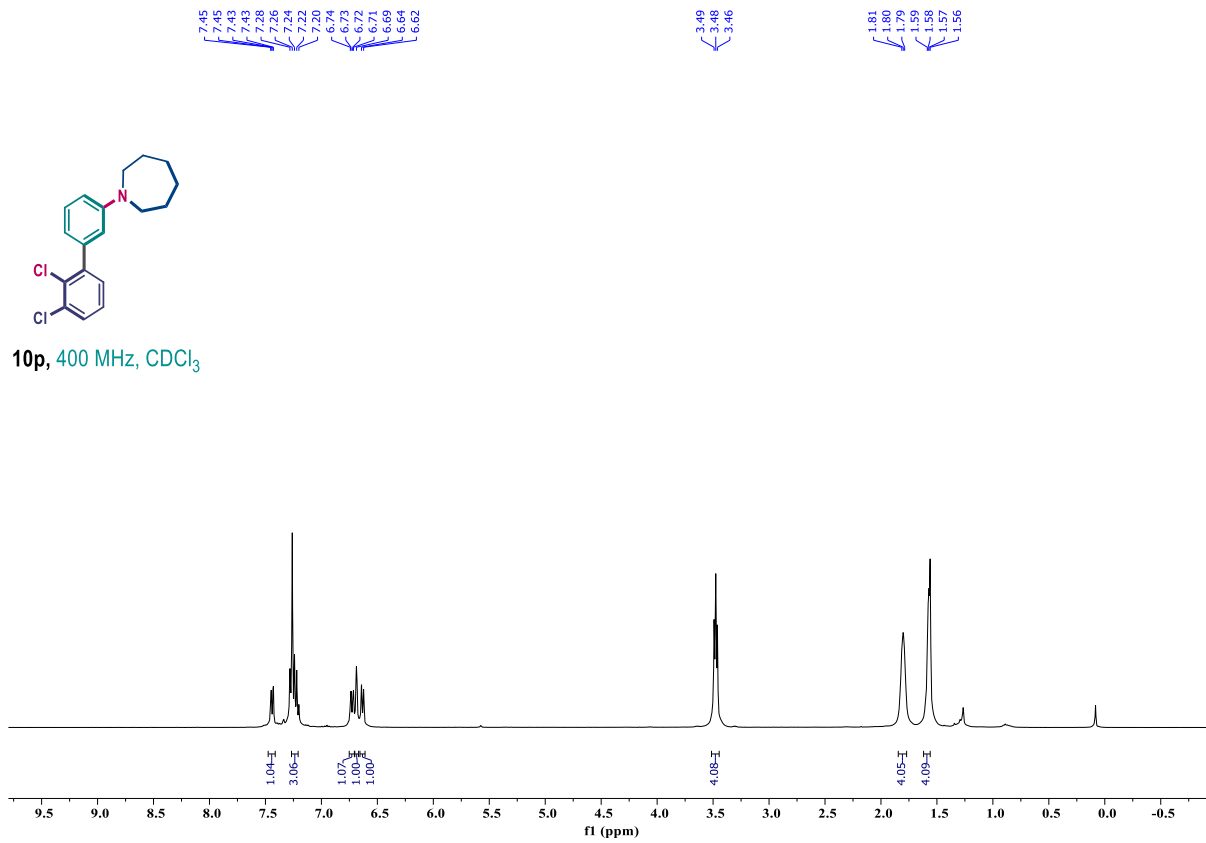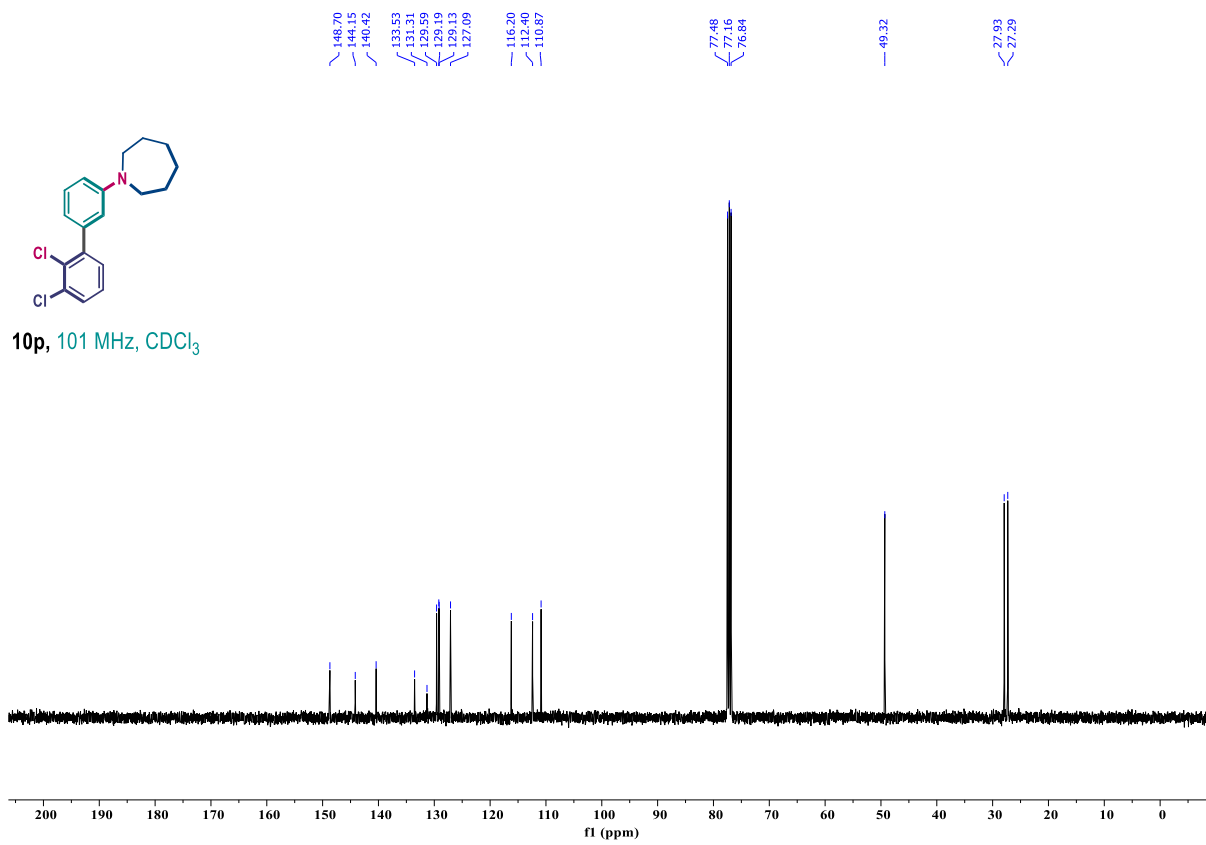

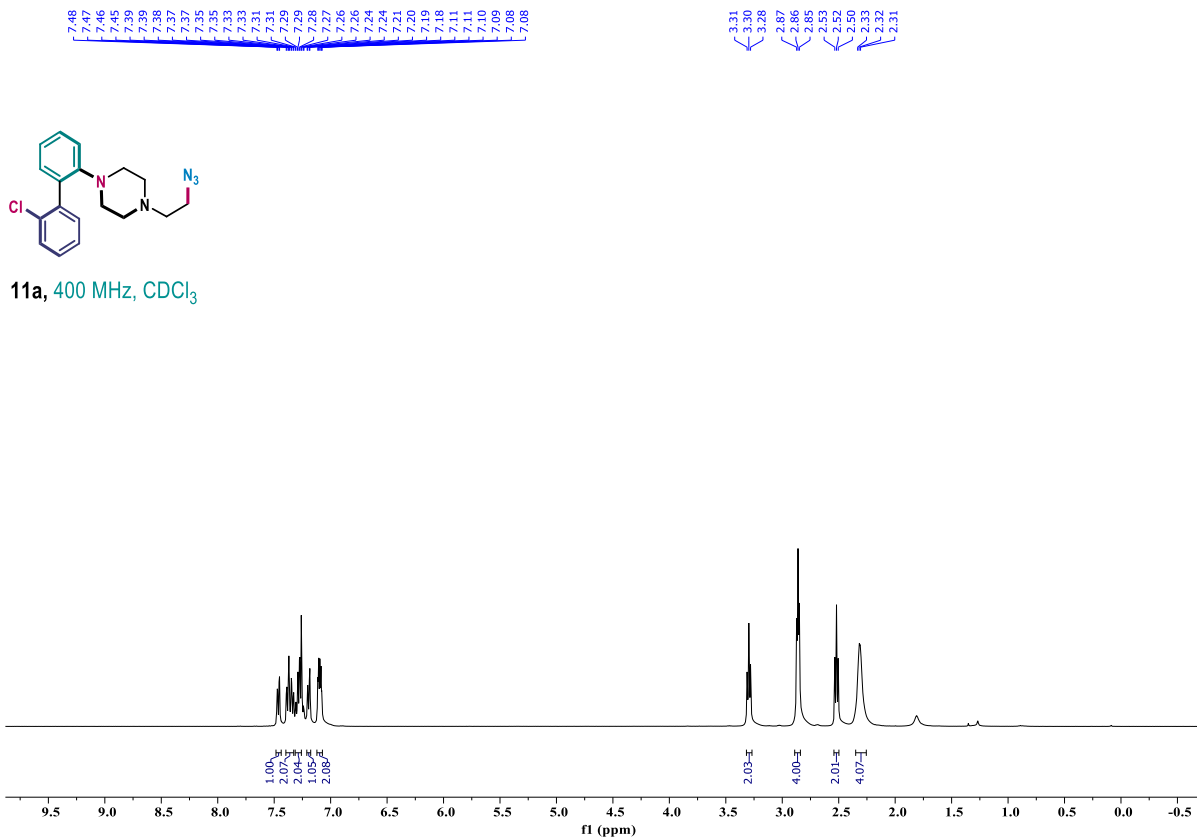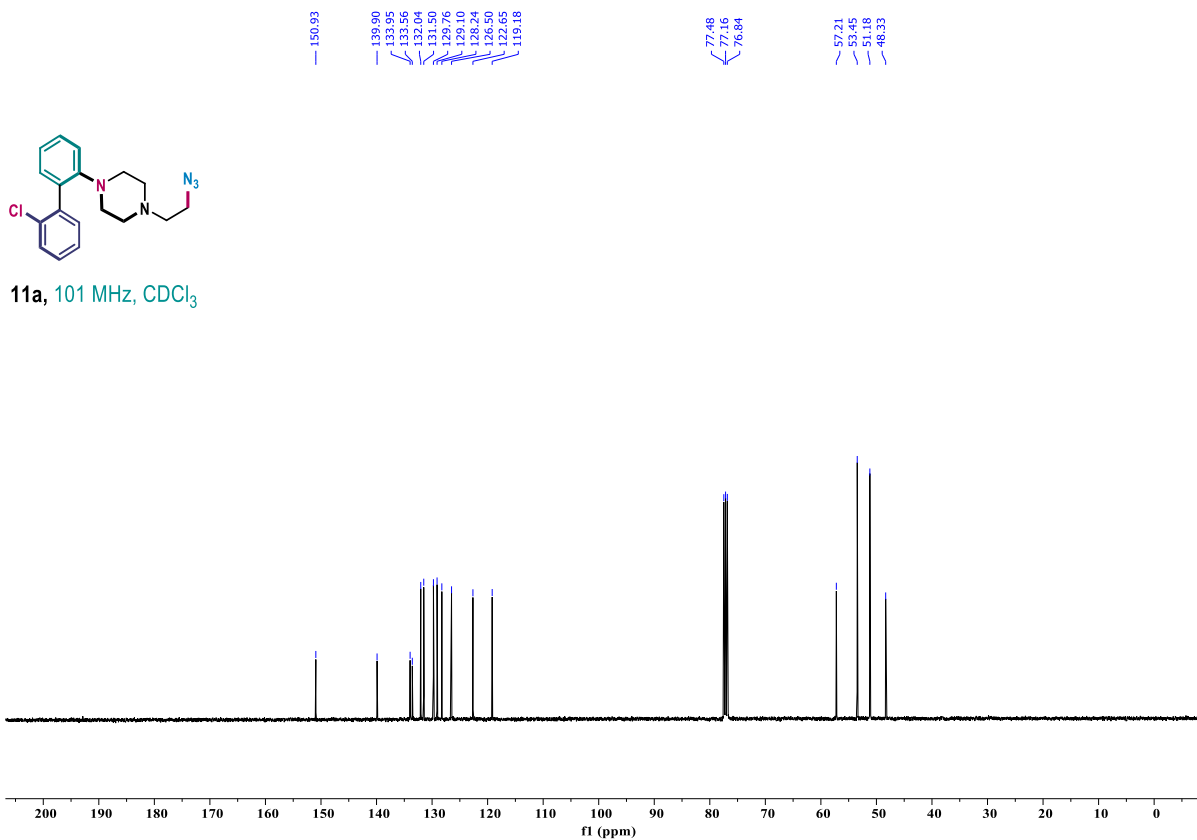

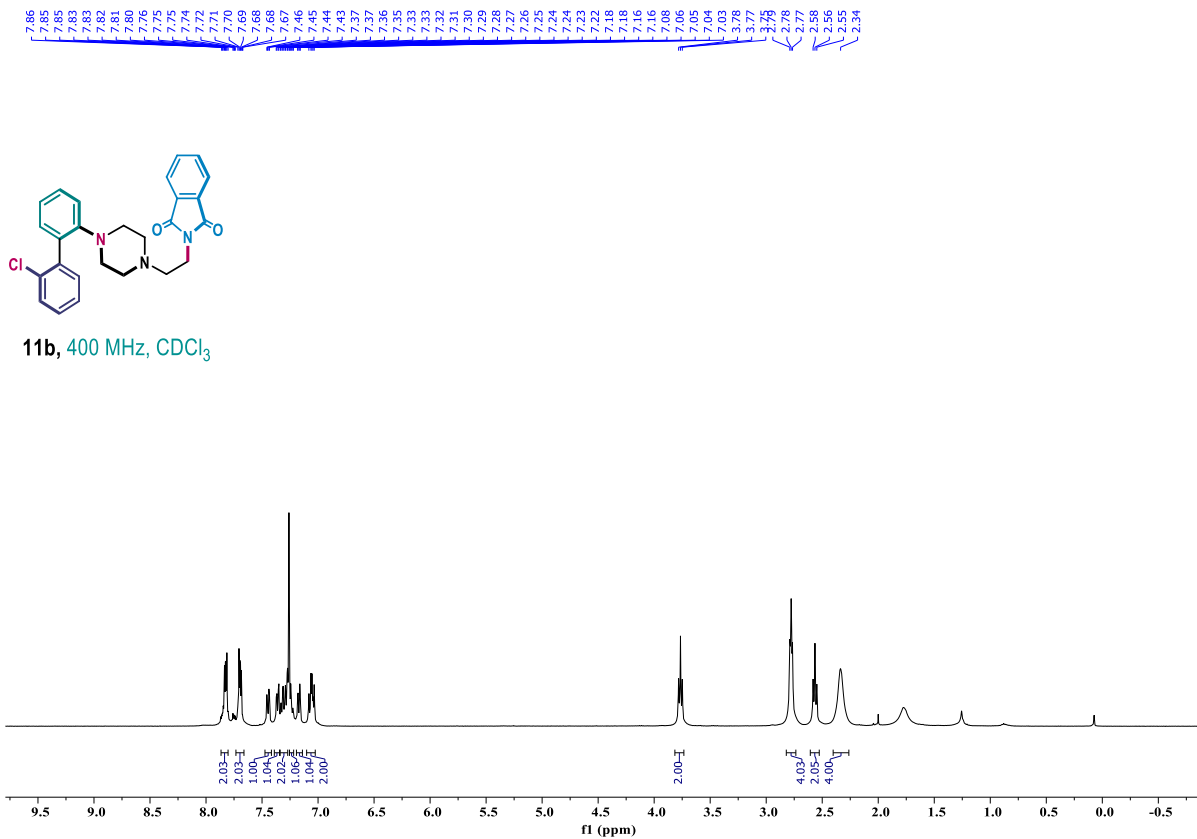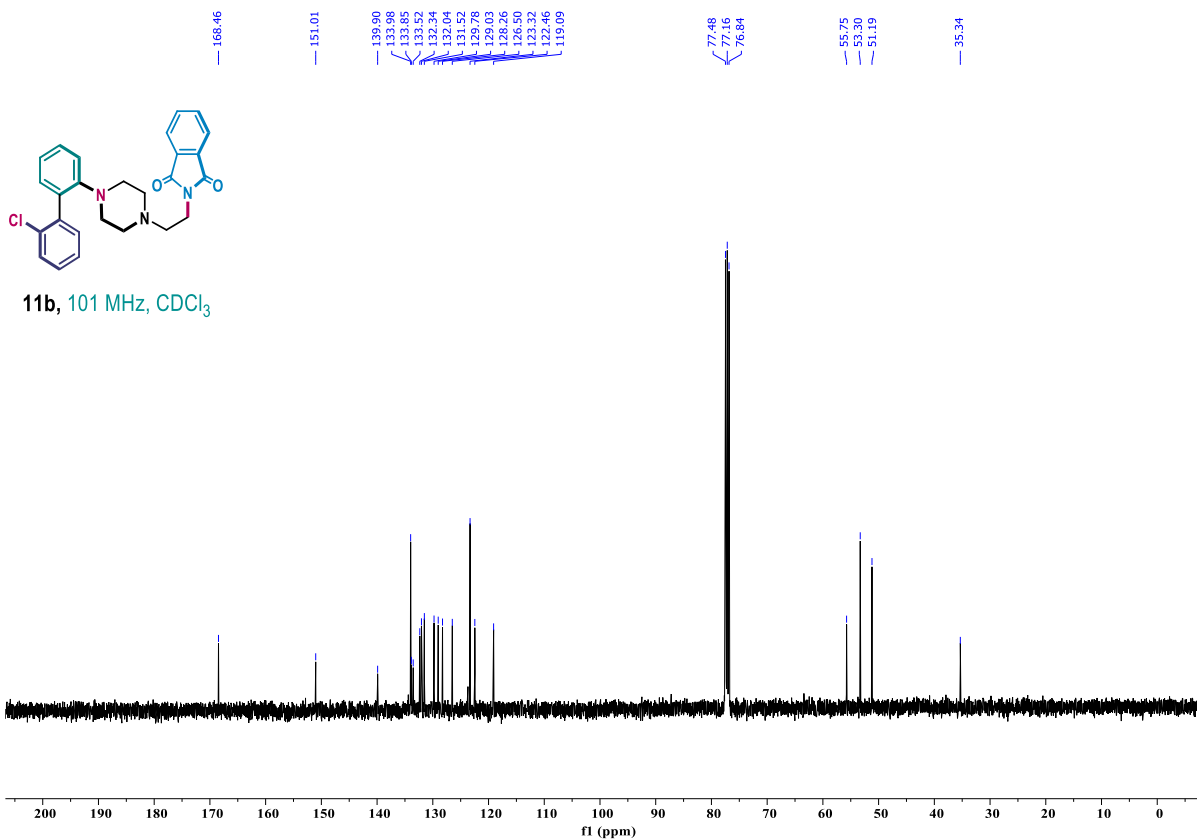

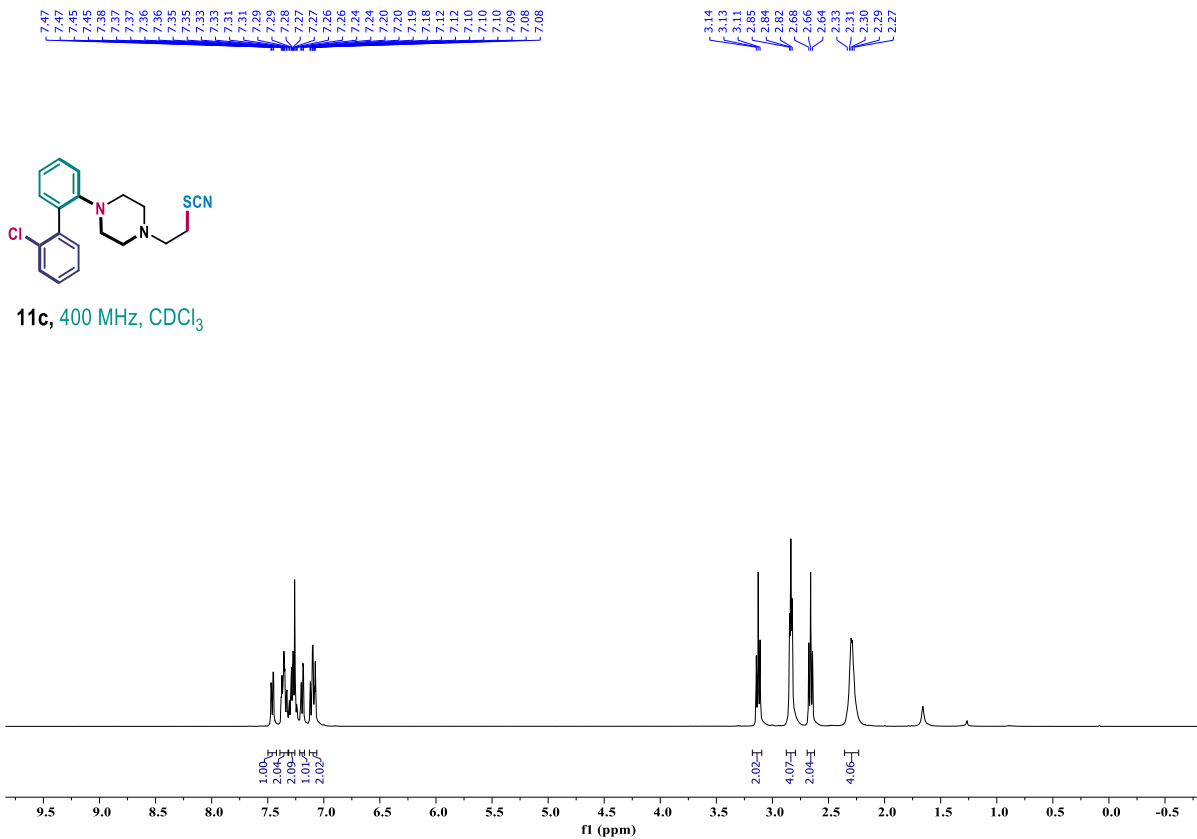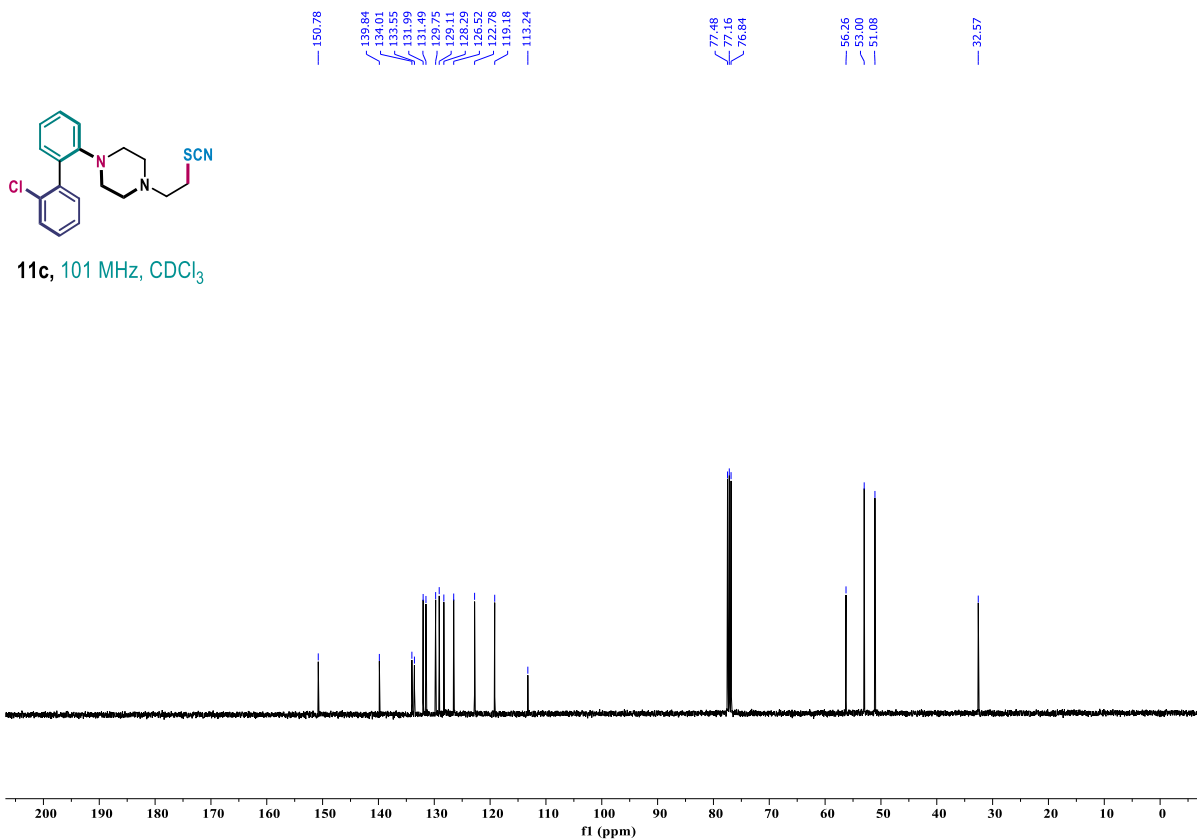

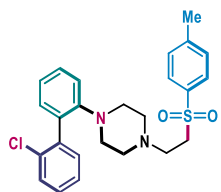

11d, 400 MHz, CDCl<sub>3</sub>

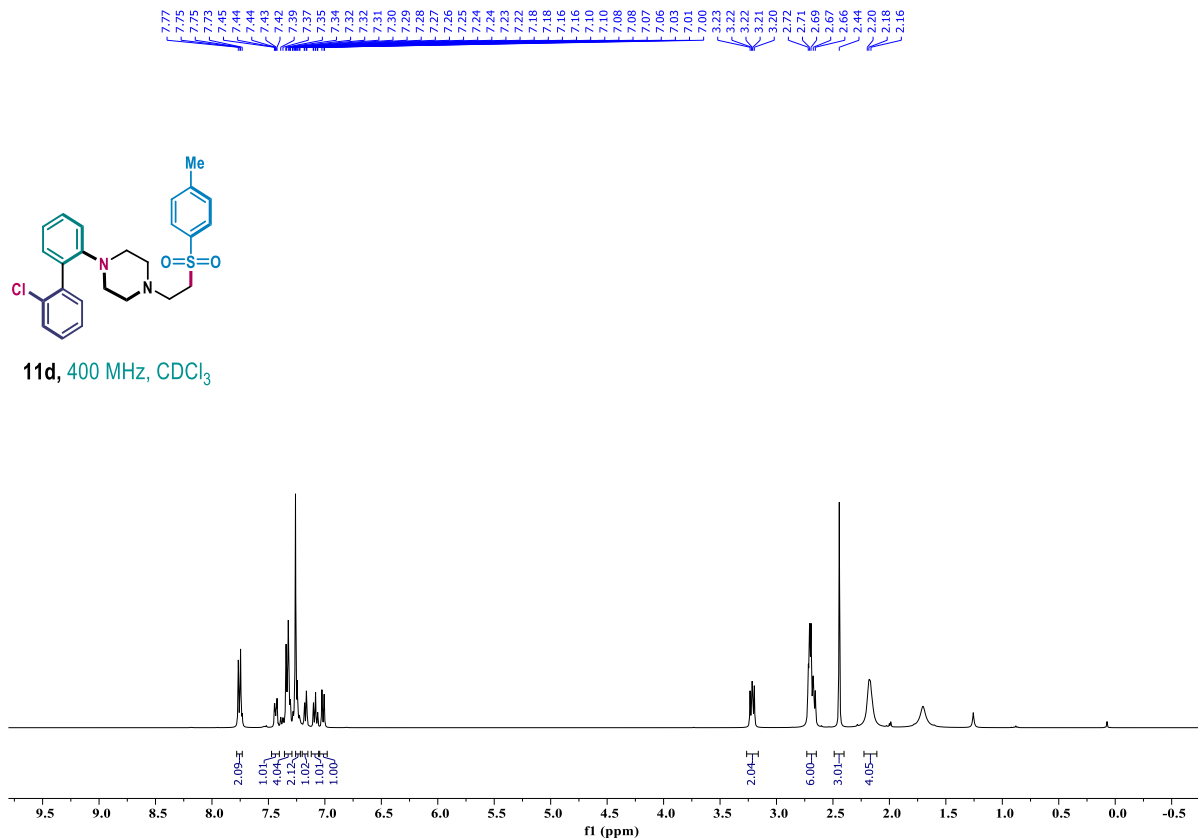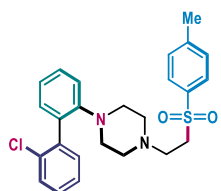

11d, 101 MHz, CDCl<sub>3</sub>

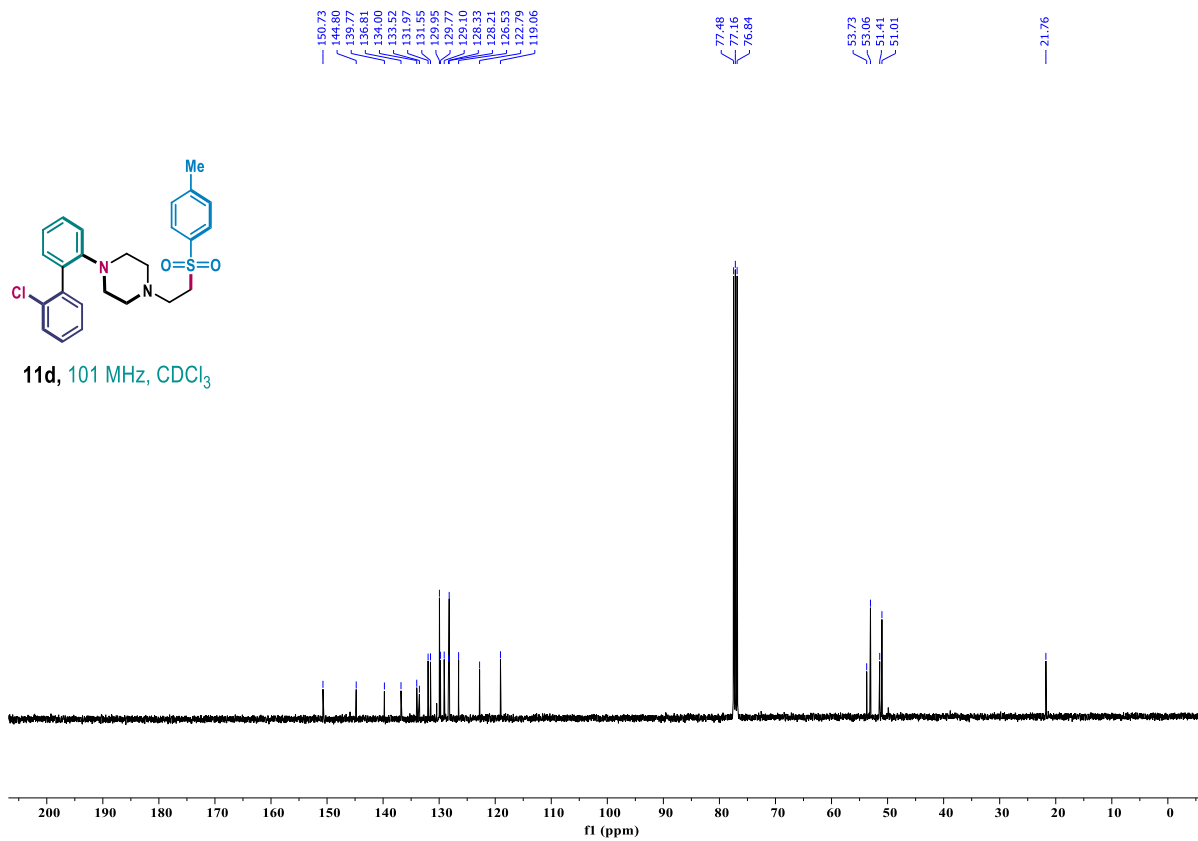



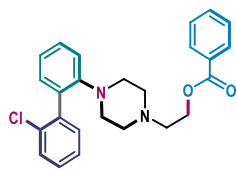

11f, 400 MHz, CDCl<sub>3</sub>

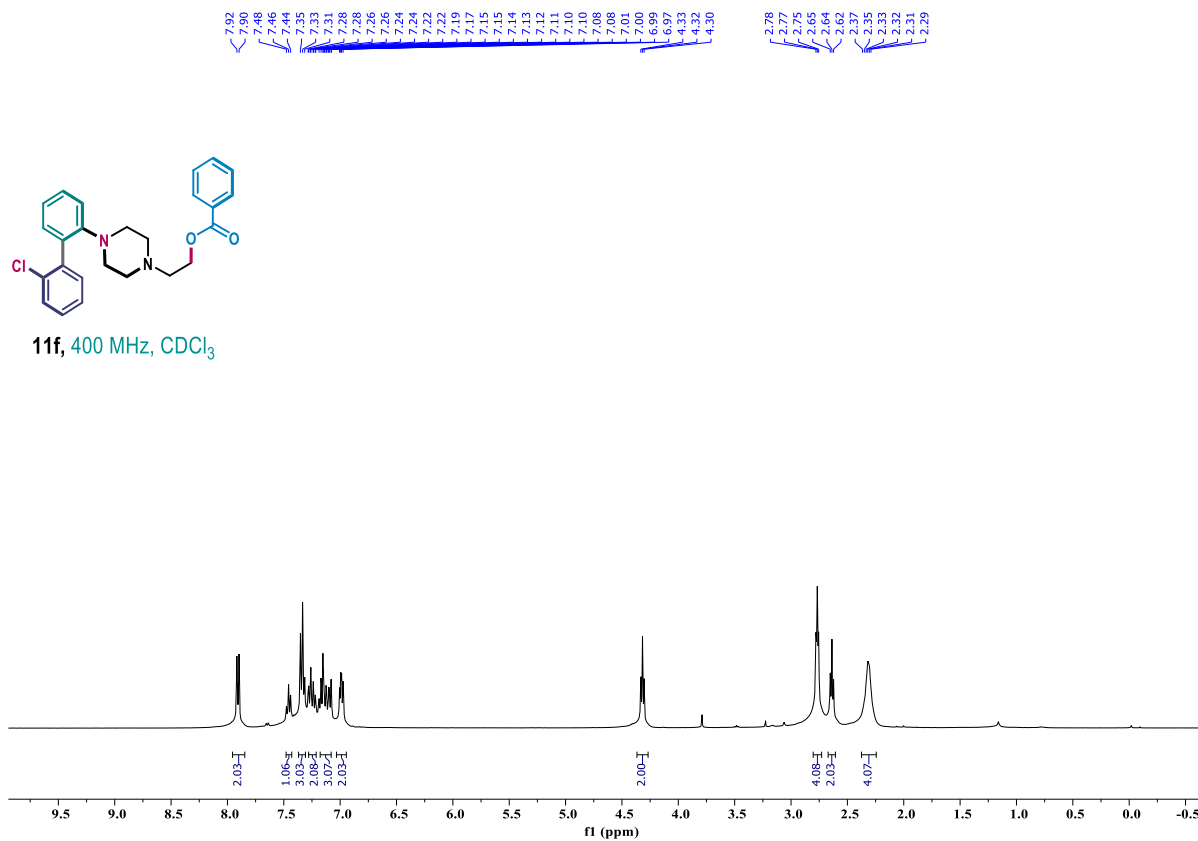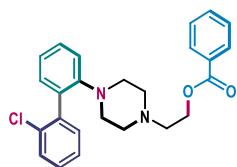

11f, 101 MHz, CDCl<sub>3</sub>

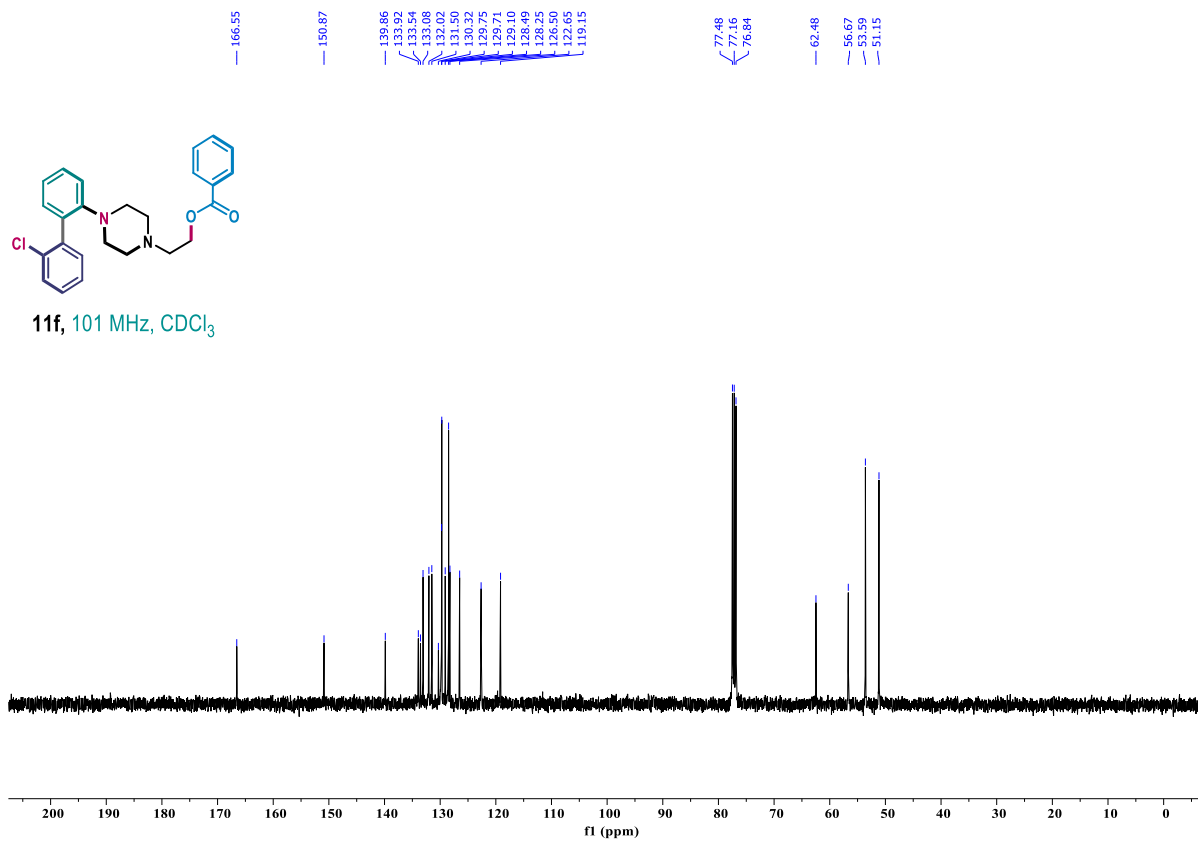



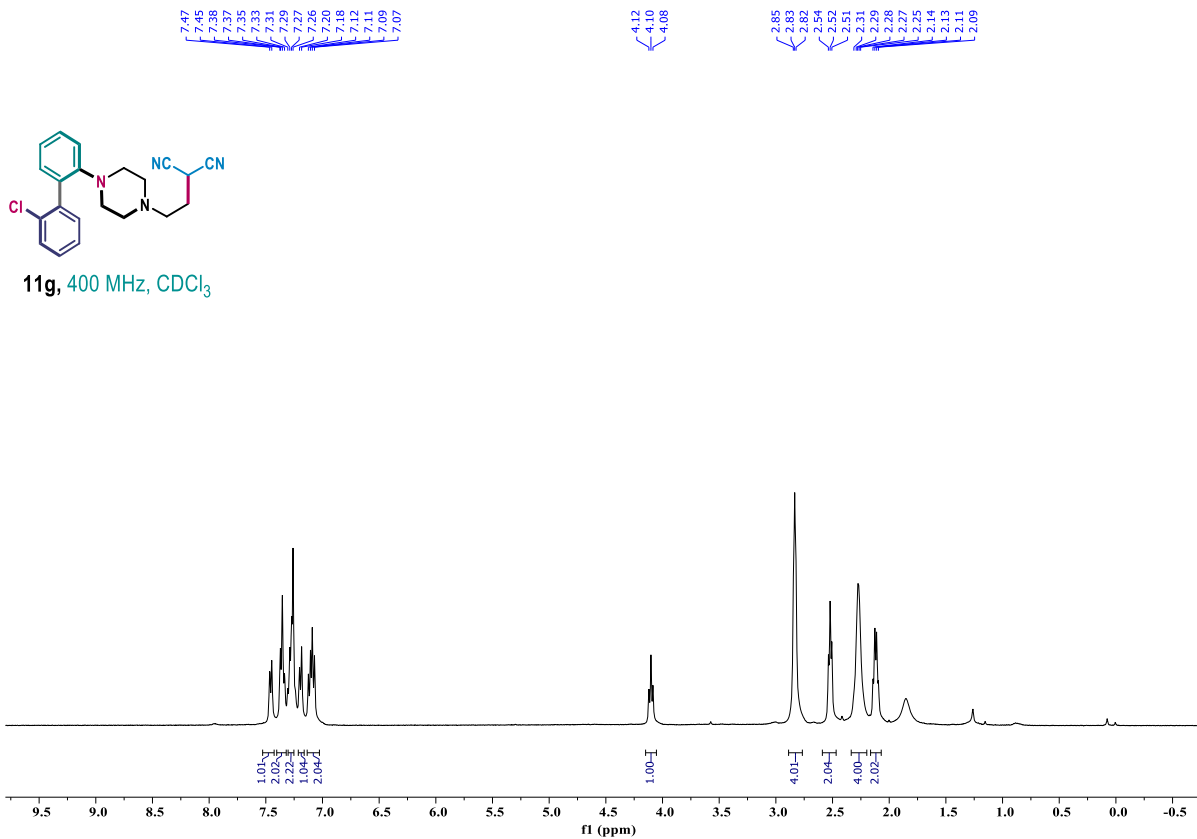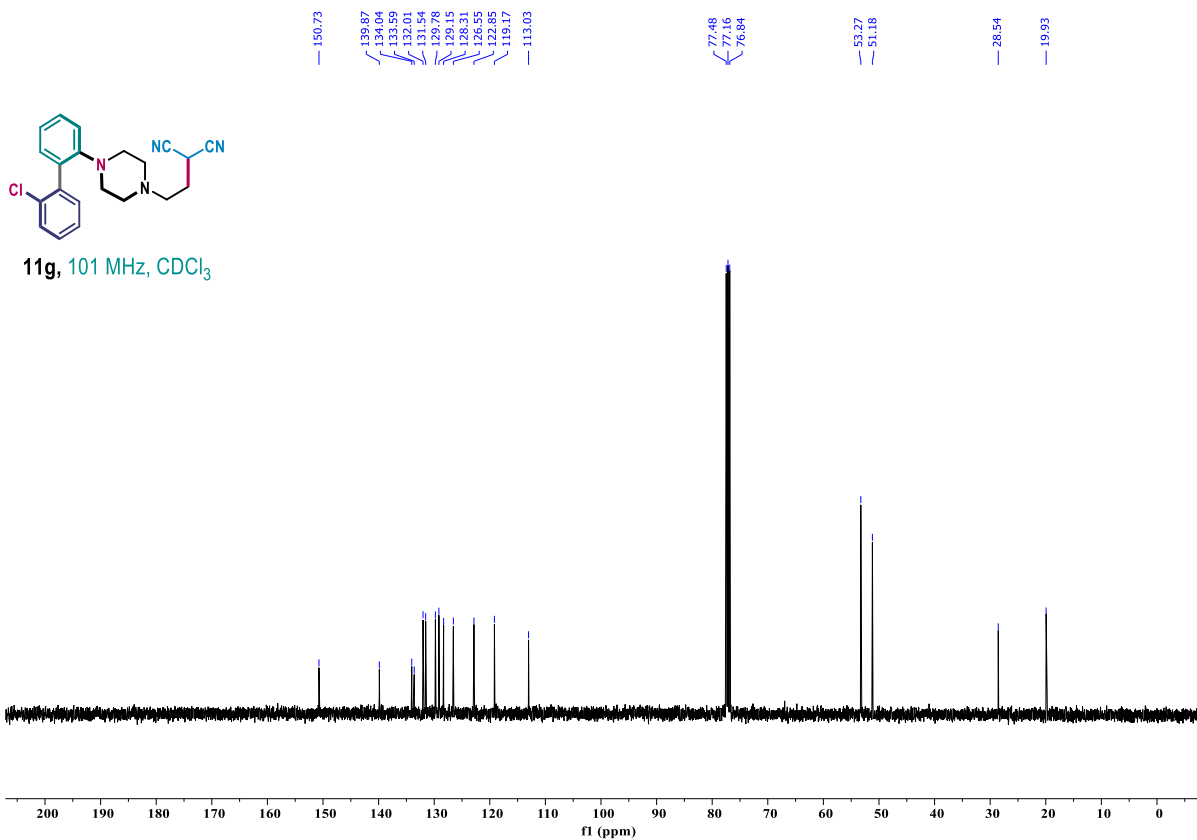

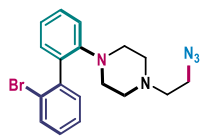

11h, 400 MHz, CDCl<sub>3</sub>

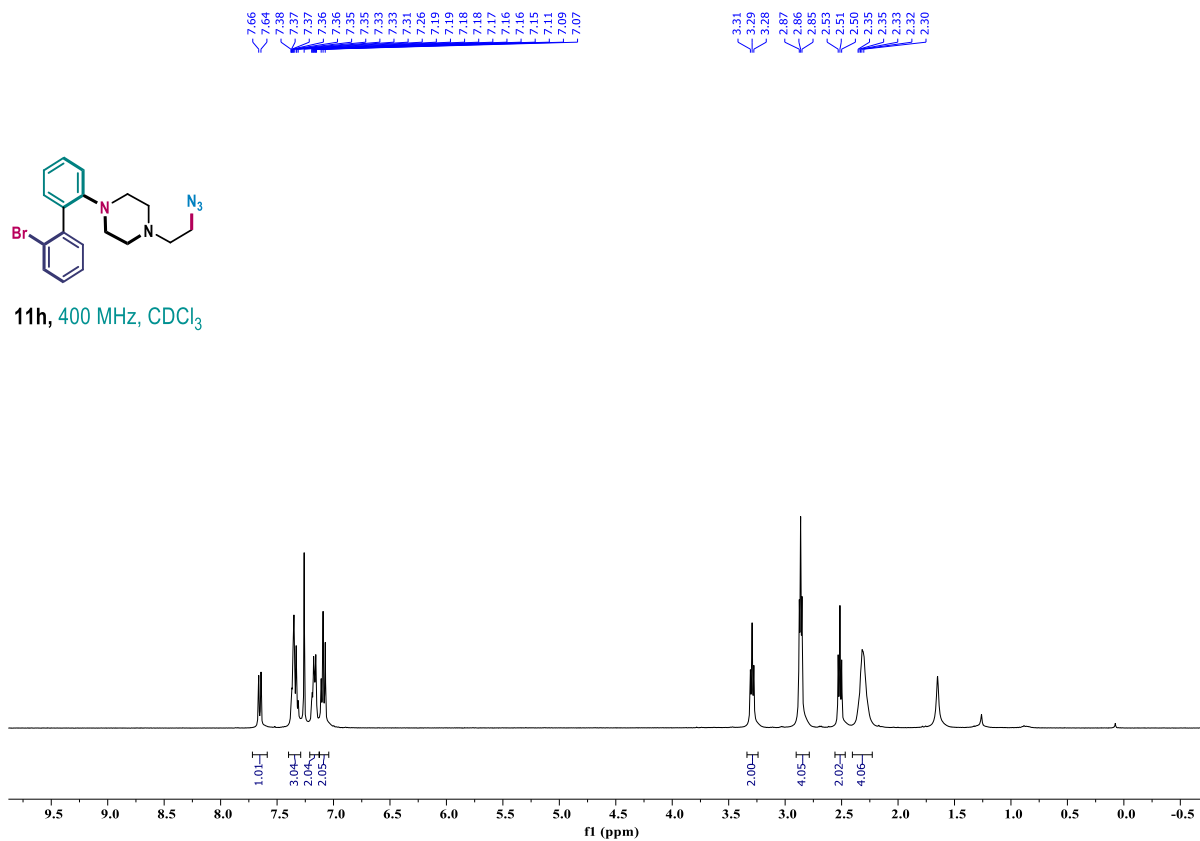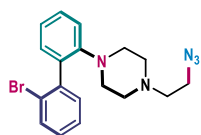

11h, 101 MHz, CDCl<sub>3</sub>

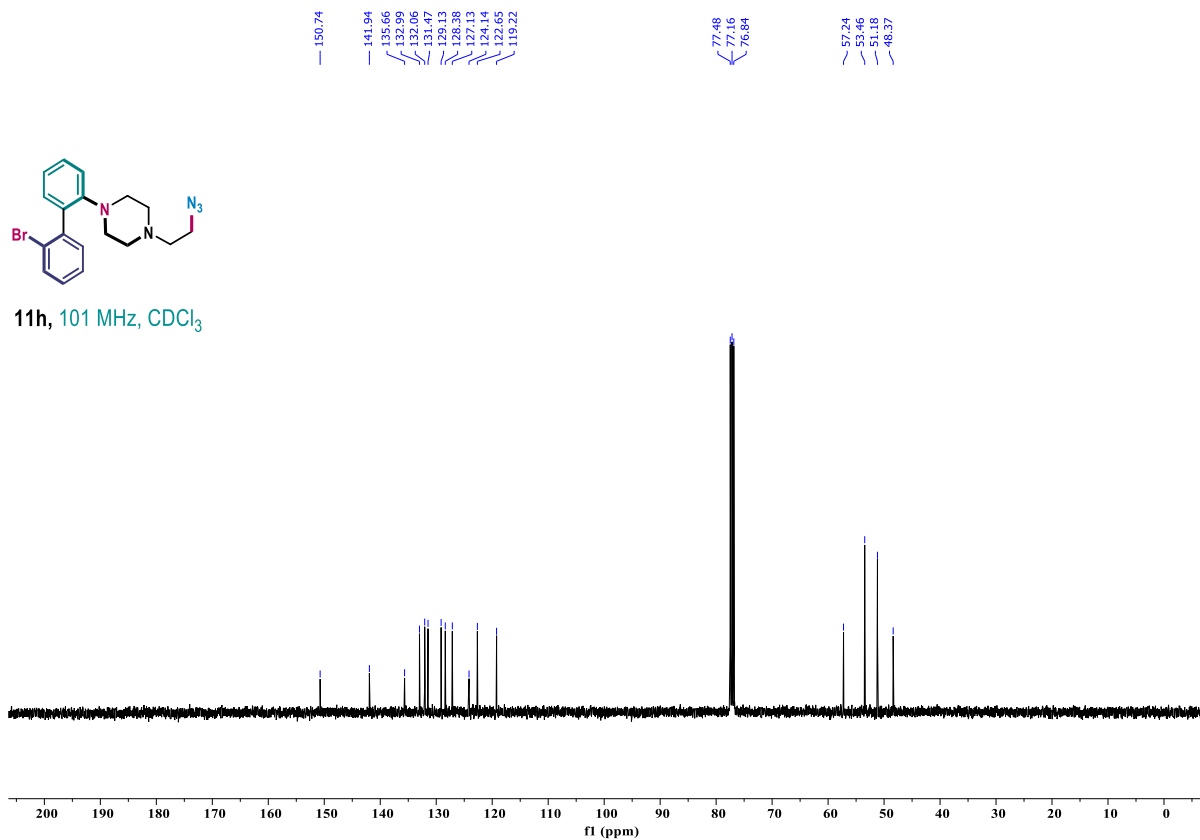

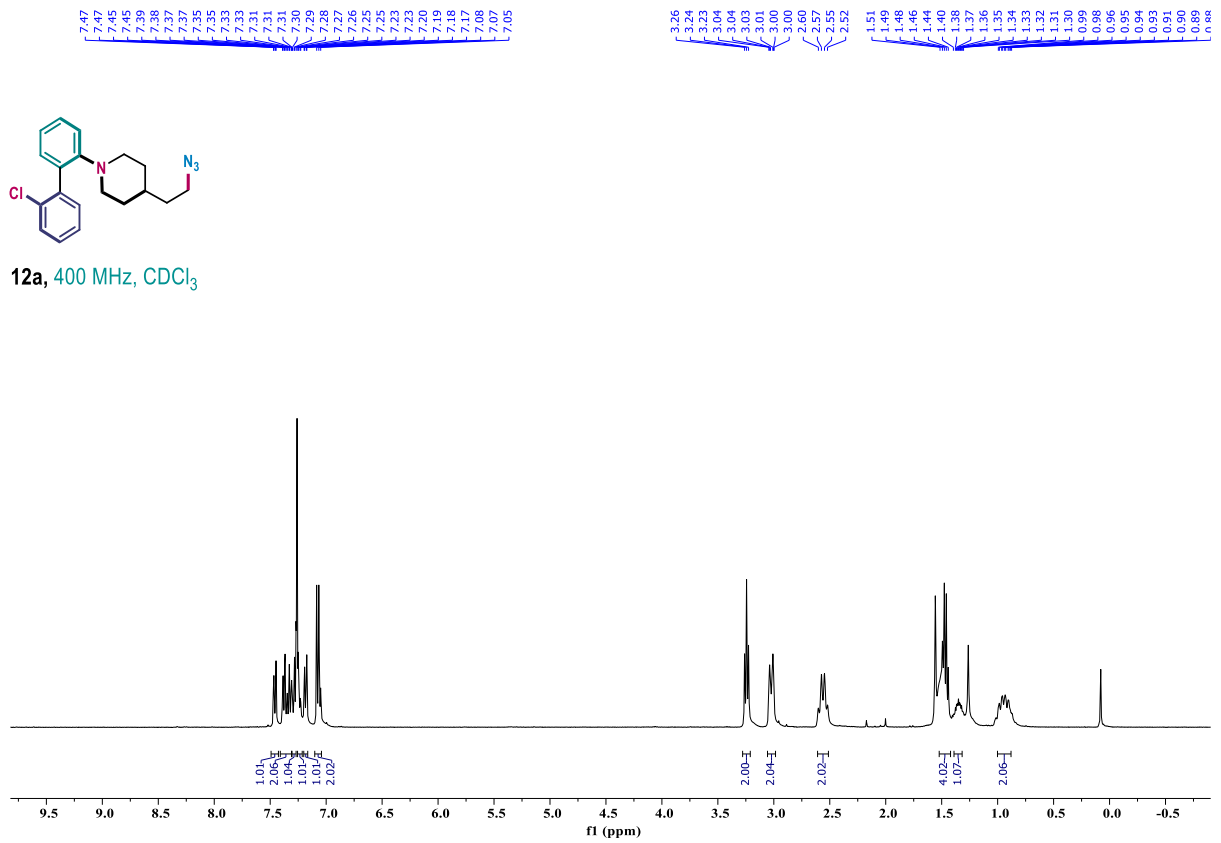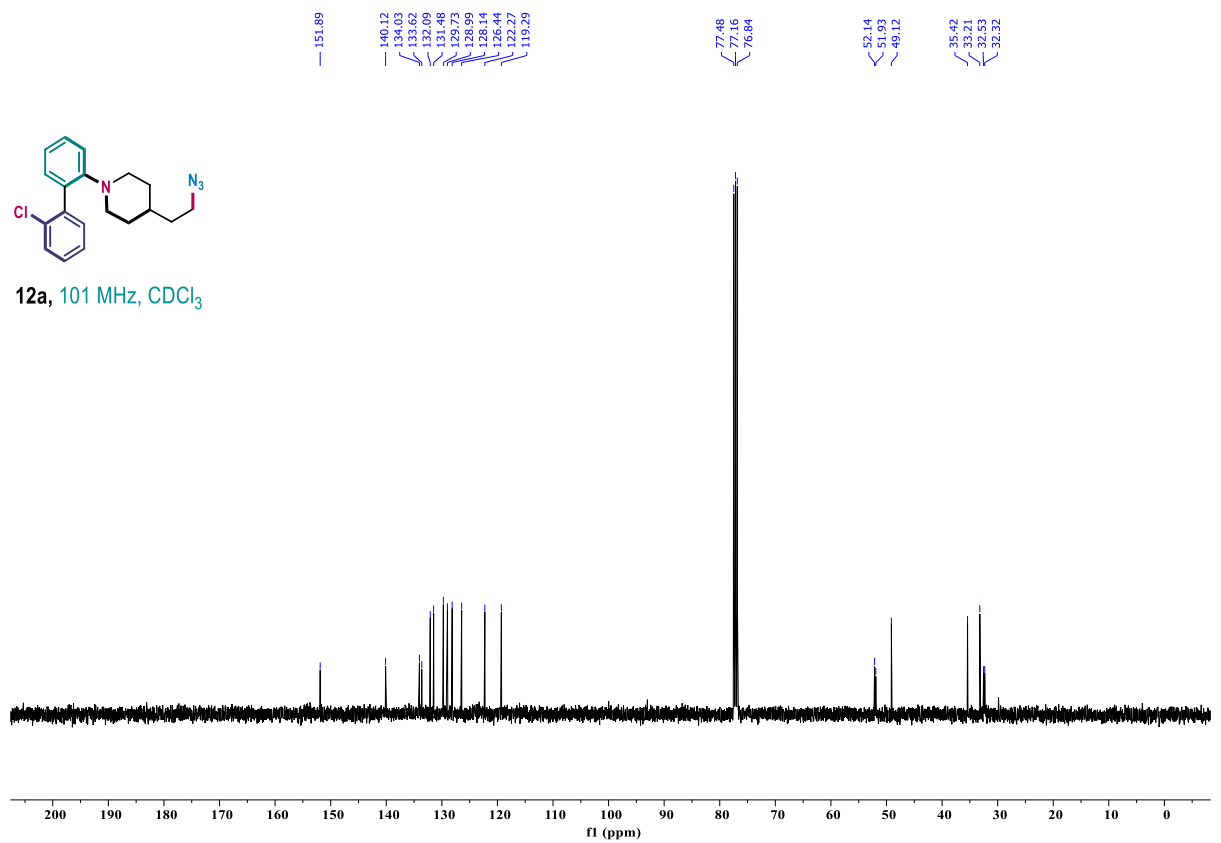

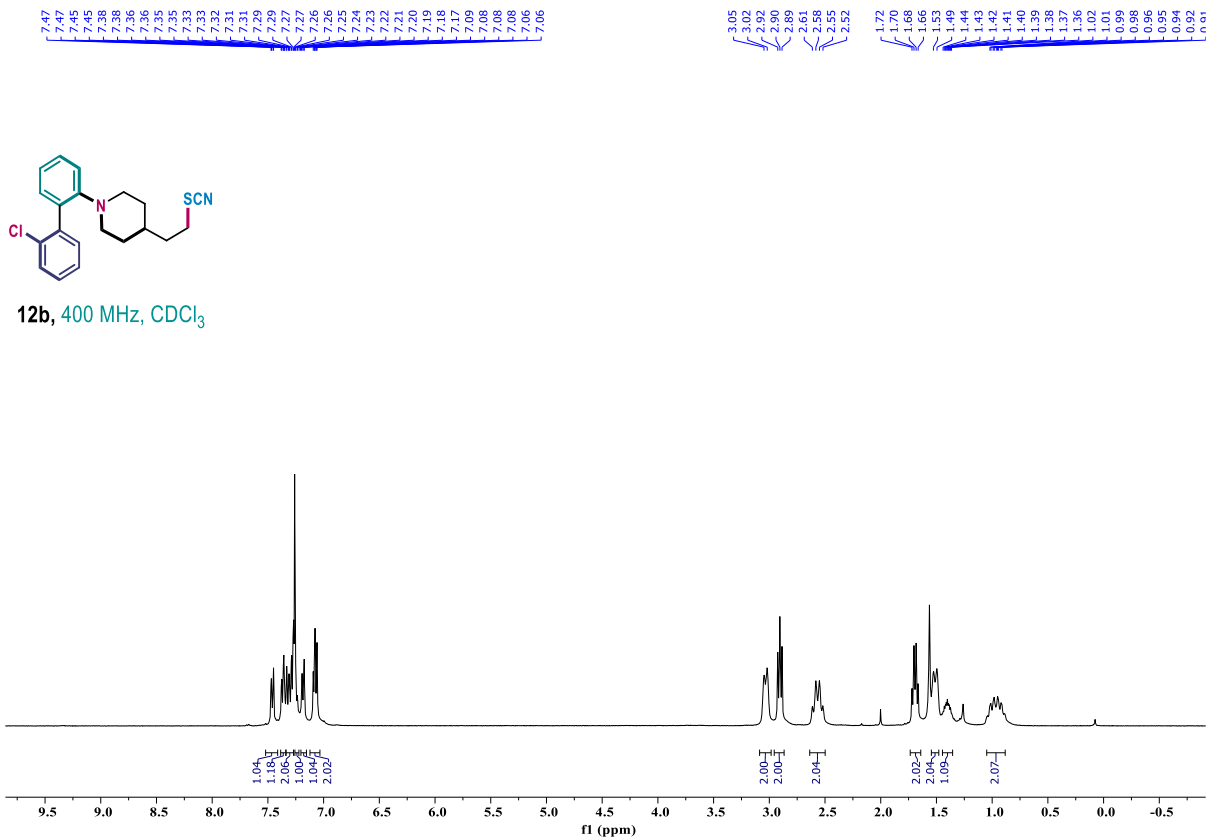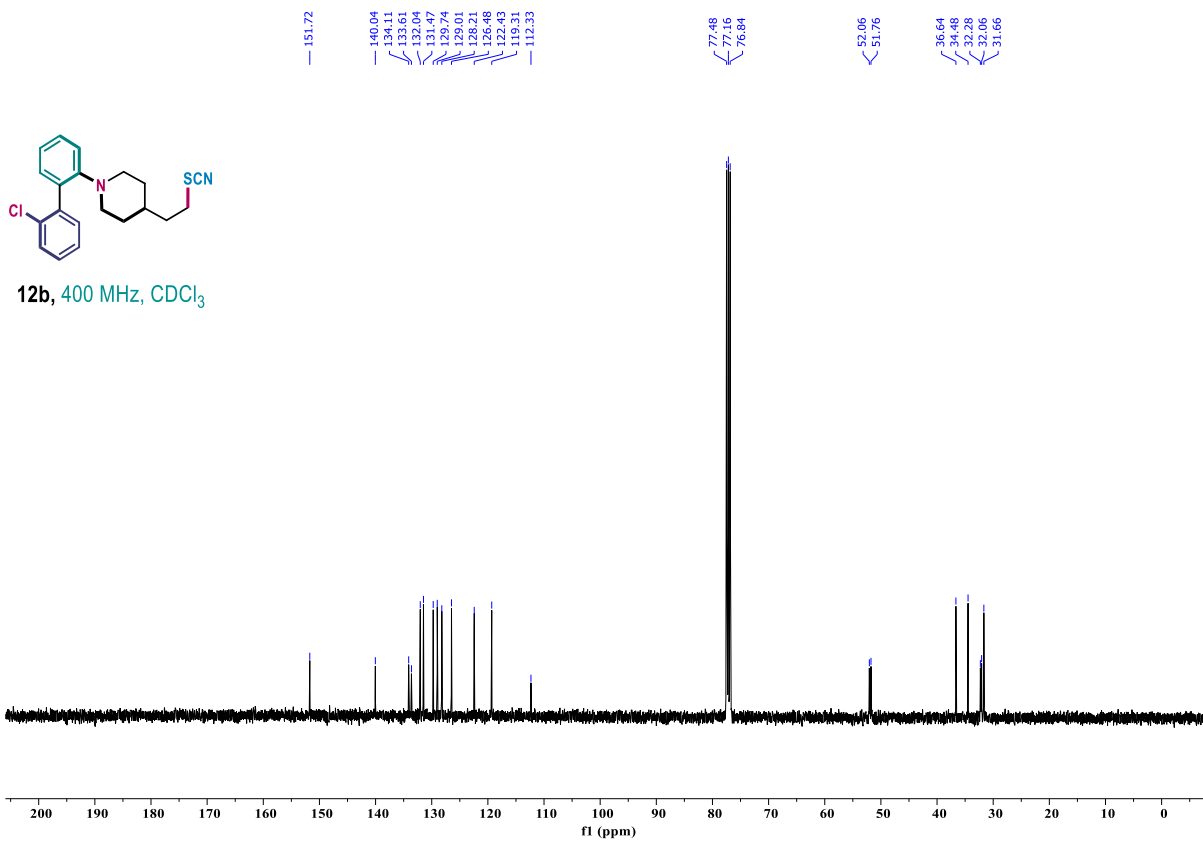

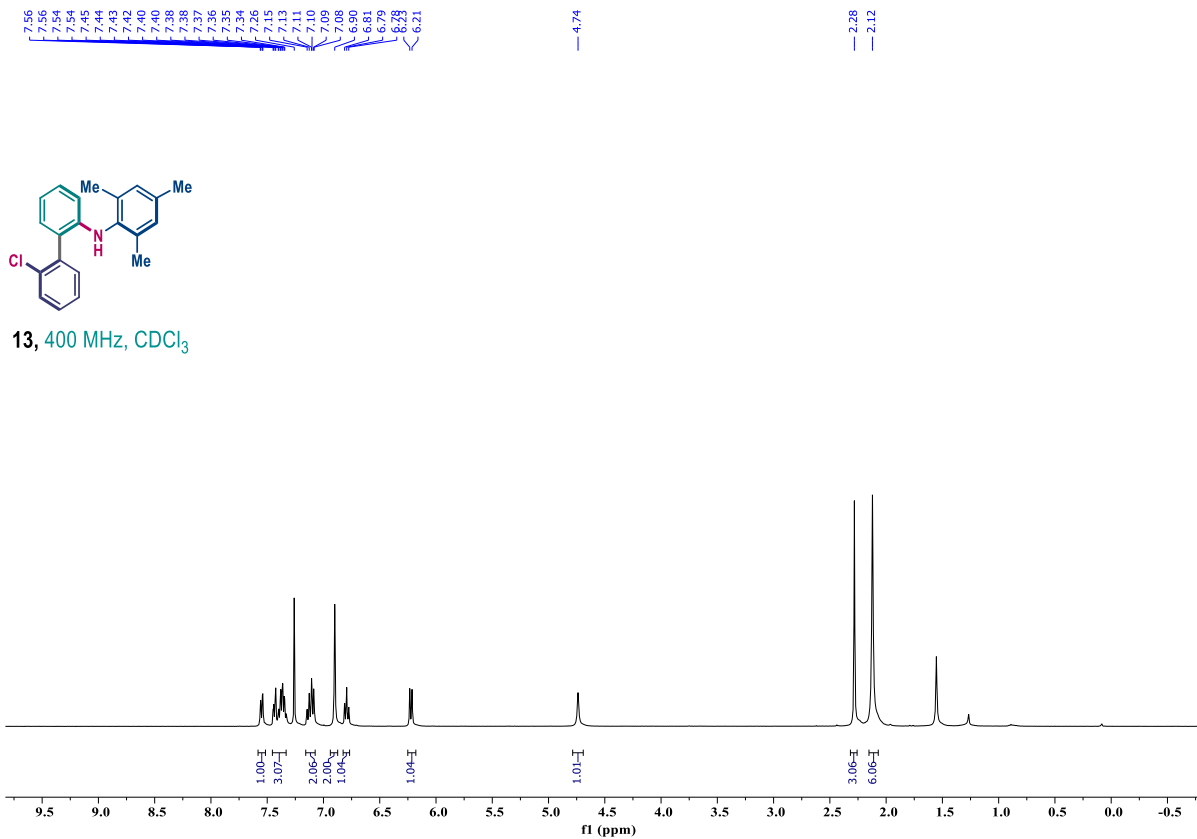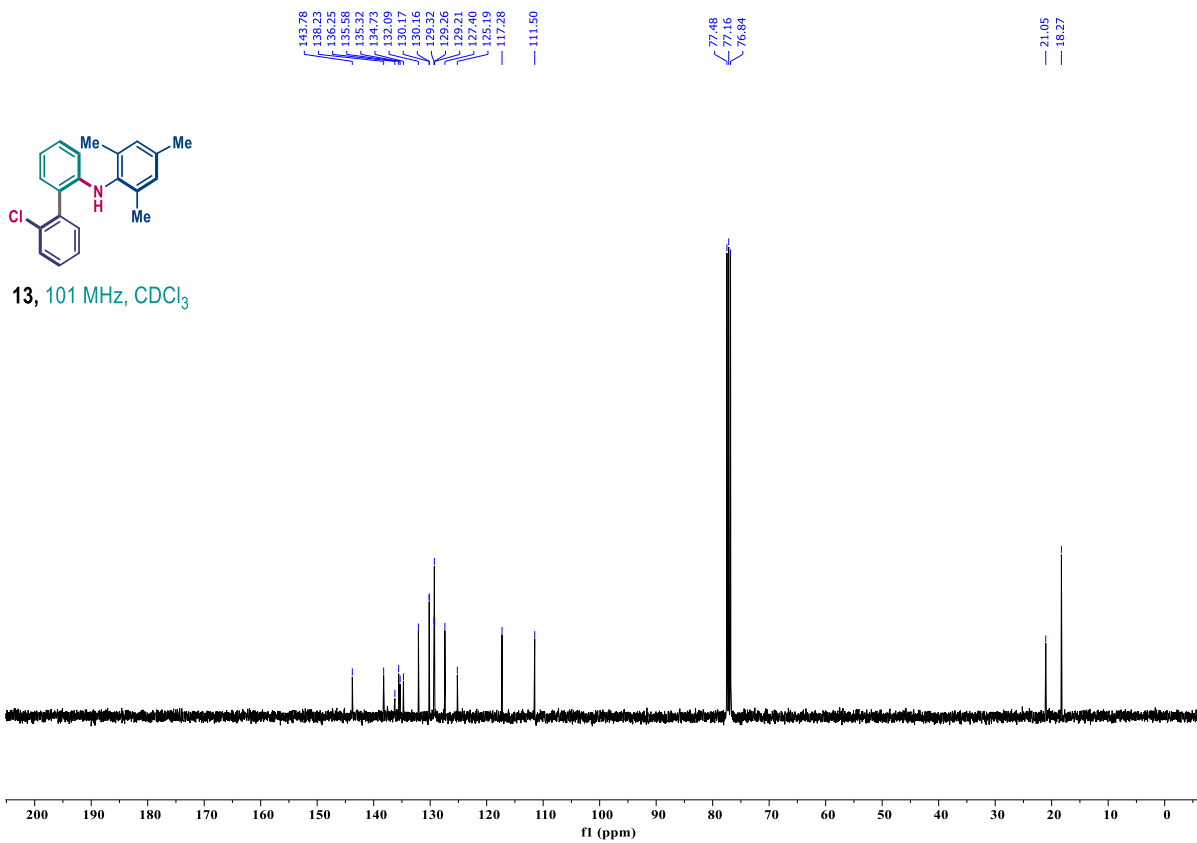

7.52  
7.51  
7.51  
7.50  
7.50  
7.49  
7.48  
7.48  
7.36  
7.35  
7.34  
7.34  
7.33  
7.33  
7.32  
7.32  
7.31  
7.30  
7.30  
7.29  
7.29  
7.27  
7.27  
7.27  
7.26  
7.26  
7.25  
7.25  
7.25  
7.24  
7.24  
7.23  
7.16  
7.15  
7.14  
7.14  
7.13  
7.13  
7.10  
7.09  
7.08  
7.08  
7.07  
7.06  
7.05  
7.05  
7.04  
6.96  
6.94  
5.77  
5.77  
5.53

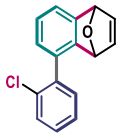

14, 400 MHz, CDCl<sub>3</sub>

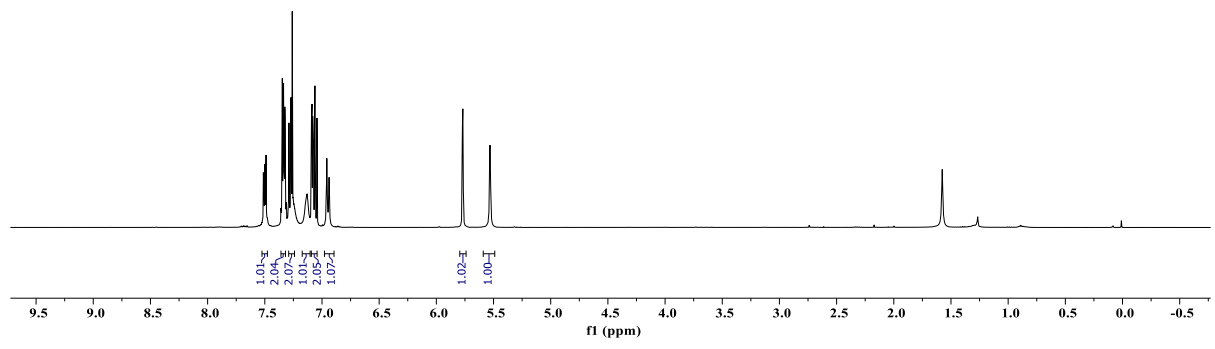

149.01  
148.48  
142.95  
138.60  
132.88  
132.66  
131.95  
129.92  
129.15  
126.99  
126.44  
125.18  
119.70  
82.71  
81.82  
77.48  
77.16  
76.84

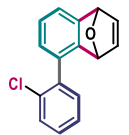

14, 101 MHz, CDCl<sub>3</sub>

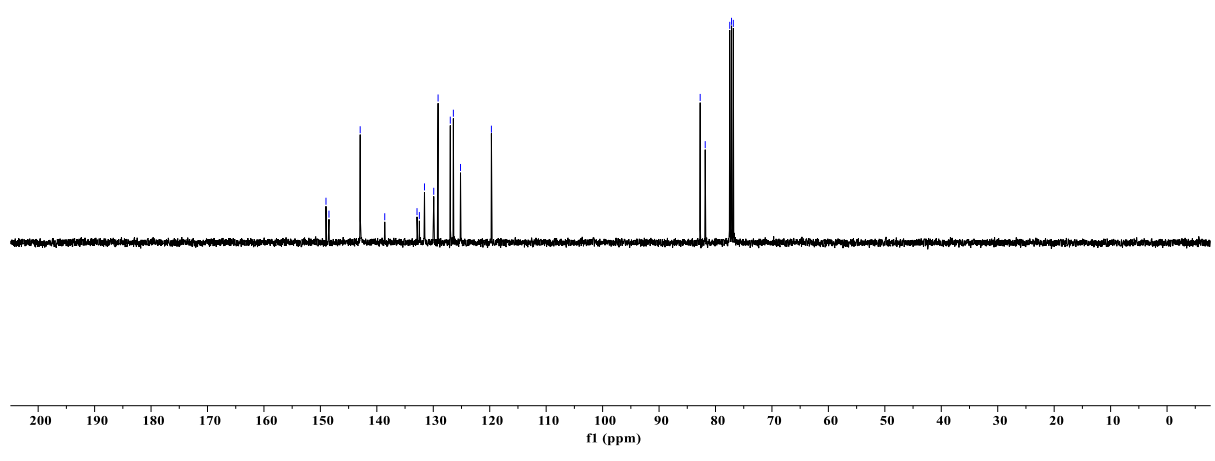

Supplement: d4sc04108a1.pdf [file d4sc04108a1.pdf]
